# Supplementary material for: Interleukin-17A released from intestinal γδT cells induces cytokine storm in mice with severe dengue
Source: Research Square preprint supplement (doi:10.21203/rs.3.rs-1983205/v1), 2022-09-16
Supplement: Supplementary file 1 [file 88de65f91e16253aa2473101.xlsx]

## Sheet: Microarray Liver
		day3vsmock					day3&a-TNFvsmock					day4vsmock			ProbeID	GeneSymbol	fold change	p-value
ProbeID	GeneSymbol	fold change	p-value		ProbeID	GeneSymbol	fold change	p-value		ProbeID	GeneSymbol	fold change	p-value		A_66_P140856	Gm4588	-3.10464	0.00380673
A_66_P140976	Rpl15	-2.17506	0.000252637		A_66_P140543	F730048M01Rik	-2.2589	0.00124373		A_66_P140856	Gm4588	-4.46204	0.000266282		A_66_P140474		2.54953	0.0241733
A_66_P140543	F730048M01Rik	-2.80887	2.74628e-05		A_66_P140474		3.23075	0.000691482		A_66_P139683	Zbp1	2.49831	0.0427422		A_66_P140185	Rgs9	-2.36206	0.0211938
A_66_P140533		2.44644	0.00352574		A_66_P140200	Olfr120	-2.30896	0.00190814		A_66_P139618	Stfa2	46.9803	0.000106964		A_66_P140103	Itga4	2.55869	0.00996521
A_66_P140507	Lhpp	-2.17147	0.00219498		A_66_P139683	Zbp1	5.9833	0.0300756		A_66_P139387	Prlr	-2.13305	0.0475533		A_66_P139683	Zbp1	4.83775	0.00271289
A_66_P140474		3.83247	0.000398654		A_66_P139618	Stfa2	3.78374	0.0151792		A_66_P138829	Ndufs8	-2.34649	0.000571733		A_66_P139618	Stfa2	7.7654	0.0037488
A_66_P140452	Map1a	-2.48719	0.000100894		A_66_P139615	Gm12409	3.13854	0.000334145		A_66_P138673	Whamm	-2.31351	0.0169369		A_66_P138956	Gm9908	-2.44786	0.033153
A_66_P140223	1810024B03Rik	-2.48769	0.000143667		A_66_P139196	Baz1a	3.54973	7.35517e-05		A_66_P138053	Gm9917	5.94414	0.0084181		A_66_P138212	Dock2	2.29928	0.032998
A_66_P140076		-2.99788	0.000132251		A_66_P139032	Gm10125	3.13405	0.00087956		A_66_P137909	2900002K06Rik	2.22544	0.047811		A_66_P138072	Esr1	2.2385	0.0318794
A_66_P139683	Zbp1	11.2441	9.86154e-05		A_66_P138319	Acox2	-2.91477	0.000195889		A_66_P137268	Abcc6	-3.84327	4.30148e-05		A_66_P138053	Gm9917	2.81848	0.038359
A_66_P139666	Tmem229a	2.21245	0.00588408		A_66_P138308	Cndp2	-2.21136	0.00283726		A_66_P137210	9130409J20Rik	-3.04554	0.00206617		A_66_P138046	Gm12298	-2.03819	0.0164907
A_66_P139618	Stfa2	8.24162	0.0037878		A_66_P138072	Esr1	3.13561	0.0131975		A_66_P136778	Mapk15	-3.9327	0.000135733		A_66_P137943	Tctn2	2.15345	0.00197525
A_66_P139615	Gm12409	3.52608	0.00171713		A_66_P138047	Gfm1	-2.05597	0.00114318		A_66_P136354	Lcp2	3.92739	0.0302389		A_66_P137909	2900002K06Rik	2.60257	0.010132
A_66_P139586	Gm813	2.11461	0.00282336		A_66_P137794	Gpr161	2.36481	0.00891717		A_66_P136186	Wee1	-2.03374	0.0465489		A_66_P137890	Gm9054	-2.25372	0.00455777
A_66_P139196	Baz1a	4.5965	0.000943096		A_66_P137605	Mb21d1	2.61542	0.0390687		A_66_P135403	AI481877	-3.52798	0.00908986		A_66_P137219	Elane	-2.18122	0.00595841
A_66_P139032	Gm10125	2.50033	0.00560313		A_66_P136930		-2.35435	0.0103098		A_66_P135391	Igfbp2	-2.63054	0.0419643		A_66_P137210	9130409J20Rik	-2.42442	0.00441409
A_66_P138976	Lpin2	-3.1203	0.00701416		A_66_P136735	1700023F02Rik	-2.05643	0.0402461		A_66_P135372	4933434I20Rik	-4.50969	0.000710493		A_66_P136930		-2.16313	0.0036971
A_66_P138929	Lox	-2.70208	0.0239678		A_66_P136354	Lcp2	3.87229	0.0368705		A_66_P135165	Nfib	-2.54126	0.0103738		A_66_P136778	Mapk15	-2.65747	0.0221094
A_66_P138584	Mnd1	-3.24426	0.000295054		A_66_P136215	Cnbd2	-2.85487	0.0266345		A_66_P134984	Gm15441	5.6418	0.0120061		A_66_P136354	Lcp2	4.17032	0.0160578
A_66_P138363		2.76269	0.00453266		A_66_P136109	Slc9c1	-2.2322	0.00193588		A_66_P134808	Nos1ap	9.72351	0.00284991		A_66_P135700	Cyp2d11	-2.21253	0.000534148
A_66_P138319	Acox2	-2.35311	0.000252758		A_66_P135700	Cyp2d11	-4.67594	0.00671094		A_66_P134775	Pter	-2.21635	0.00290044		A_66_P135391	Igfbp2	-2.23616	0.0202769
A_66_P138308	Cndp2	-3.58759	0.000136576		A_66_P135651	Capn9	-2.20322	0.0323032		A_66_P134534	Atl2	2.09677	0.00218076		A_66_P135372	4933434I20Rik	-5.41056	0.000382249
A_66_P138212	Dock2	2.10783	0.000649357		A_66_P135018	Krtap5-1	2.47443	0.00409882		A_66_P134474	Ang3	2.97432	0.000121535		A_66_P135323	Tyr	-2.91847	0.0387917
A_66_P138137	Pnp	2.13974	0.00325784		A_66_P135003	Gm5531	2.3432	0.000559668		A_66_P134457	Sntg1	2.14624	0.0292123		A_66_P135165	Nfib	-2.07855	0.0333992
A_66_P138072	Esr1	4.42951	0.00204251		A_66_P134808	Nos1ap	7.38112	0.0171969		A_66_P134453	I830077J02Rik	2.91068	0.015633		A_66_P134808	Nos1ap	13.2294	0.00605299
A_66_P138053	Gm9917	2.7927	0.037876		A_66_P134704	Gm4952	-5.49465	0.034275		A_66_P134383	Gm5079	-2.53177	0.0012674		A_66_P134674	Far1	2.61356	0.0216571
A_66_P138047	Gfm1	-2.52331	0.000168068		A_66_P134474	Ang3	3.12533	0.00680975		A_66_P134297	Olfr978	4.96968	0.0250488		A_66_P134474	Ang3	3.20069	0.000247734
A_66_P137660	Fam166b	-2.13616	0.03827		A_66_P134441	Pcnxl3	2.02343	0.00671718		A_66_P134265	Fam47e	-3.57914	0.0120016		A_66_P134383	Gm5079	-2.53932	0.00168151
A_66_P137654	Smpd2	-3.0389	5.14788e-05		A_66_P134171	Adck1	3.28085	0.00178717		A_66_P133450	Dnajb9	2.28376	0.0165814		A_66_P134297	Olfr978	4.16501	0.0344303
A_66_P137605	Mb21d1	3.40454	0.00756155		A_66_P133450	Dnajb9	2.30653	0.0283171		A_66_P133397	Chi3l4	4.23776	0.00147636		A_66_P134181	Aym1	-2.0394	0.00399974
A_66_P137268	Abcc6	-3.09294	0.000202626		A_66_P133255	Prkch	3.77501	0.000275405		A_66_P133328	Tpd52	2.23406	0.00438455		A_66_P133397	Chi3l4	2.42735	0.0112014
A_66_P136930		-3.01809	0.001332		A_66_P133244	Vcl	-2.78671	0.000160765		A_66_P133269	Hesx1	5.63776	0.0499404		A_66_P133255	Prkch	2.47106	0.00100072
A_66_P136778	Mapk15	-3.01851	0.00363021		A_66_P132971	4930429E23Rik	-4.44143	0.002402		A_66_P133255	Prkch	3.02667	0.0454198		A_66_P132218	Gm4430	3.70954	0.00422193
A_66_P136749	Trim43c	-2.31684	8.88415e-05		A_66_P132870		2.88496	0.0003131		A_66_P133148	Aoah	5.96767	0.0224348		A_66_P131389	Ugt2b38	-2.52755	0.00586515
A_66_P136735	1700023F02Rik	-3.19751	0.00399589		A_66_P132657	Epha6	-2.10465	0.00325105		A_66_P132888	Dhfr	-3.336	0.000342888		A_66_P130650	Gm9979	-2.40872	0.0368846
A_66_P136372	Mrpl9	-2.36138	9.042e-05		A_66_P132515	Chmp4c	2.5262	0.00561508		A_66_P132832	Myzap	2.54912	0.0367429		A_66_P130115	Fads2	-2.75763	0.00021094
A_66_P136364		-2.05424	0.00171346		A_66_P132218	Gm4430	4.03675	0.0063829		A_66_P132249	Akr1c13	-2.10452	0.00222118		A_66_P130035	Klk1b24	-3.86036	0.00272136
A_66_P136354	Lcp2	8.0309	0.00322306		A_66_P131851	Kcnmb1	-2.05486	0.00307345		A_66_P132218	Gm4430	6.90844	0.00120391		A_66_P129958	A430048G15Rik	-3.80018	0.000903536
A_66_P136186	Wee1	-3.41659	0.0392118		A_66_P131398	Ror2	-2.24322	0.00174645		A_66_P132062	Gm5608	6.45558	0.0282001		A_66_P129893	1700047M11Rik	2.90778	0.000242752
A_66_P136109	Slc9c1	-2.31101	0.0150363		A_66_P131389	Ugt2b38	-2.8398	0.0132955		A_66_P131389	Ugt2b38	-3.0017	0.017414		A_66_P129800	Rab8b	2.55439	0.00273487
A_66_P136099	Coasy	-2.04102	0.000153638		A_66_P131235	Gucy2g	-2.21471	0.00256215		A_66_P131091	Rabl6	-2.03194	0.000469497		A_66_P129769	Sik2	2.62995	0.0422442
A_66_P136095	Ctnna3	-3.02802	3.44367e-05		A_66_P131169	LOC100862268	-2.25803	0.0013133		A_66_P130650	Gm9979	-3.03142	0.000208186		A_66_P128942	Mipep	-3.04607	0.00187577
A_66_P135947	Col6a4	-2.61992	7.96273e-05		A_66_P130855		-2.23327	0.021292		A_66_P130416	Arsb	-2.69035	0.000532301		A_66_P127262		-2.15192	0.0143305
A_66_P135700	Cyp2d11	-6.69117	1.35698e-05		A_66_P130663	Gm15628	-2.17328	0.00109998		A_66_P130115	Fads2	-3.73212	0.0012584		A_66_P127161	Cyp2u1	-2.71779	5.96949e-05
A_66_P135651	Capn9	-2.83909	0.0117195		A_66_P130650	Gm9979	-2.42204	0.0154155		A_66_P130100	Rab23	-2.00511	0.000788657		A_66_P126877	Vmn1r214	-4.80443	0.00502364
A_66_P135391	Igfbp2	-5.12955	0.00129324		A_66_P130348	4930520P13Rik	2.41253	0.00830384		A_66_P130035	Klk1b24	-10.5424	0.000172599		A_66_P126640	Car8	-4.86701	0.00059676
A_66_P135372	4933434I20Rik	-3.42555	0.0117994		A_66_P130100	Rab23	-2.138	0.0111582		A_66_P129958	A430048G15Rik	-2.8126	0.0433558		A_66_P126563	Ptges3l	-2.28361	0.00406488
A_66_P135106	Slco3a1	2.0184	0.0012643		A_66_P129769	Sik2	3.01381	0.0265573		A_66_P129893	1700047M11Rik	2.30872	0.00322997		A_66_P126313	Rhof	4.68724	0.0054488
A_66_P135018	Krtap5-1	2.79774	0.00396559		A_66_P129622	Phldb3	-2.56945	0.00472178		A_66_P129800	Rab8b	2.21142	0.00323845		A_66_P125973	1700025N23Rik	-3.04333	0.0329241
A_66_P134808	Nos1ap	26.3927	0.000184709		A_66_P129508	Hyls1	2.47598	0.0478123		A_66_P129763	Gm6329	-2.34095	0.0121621		A_66_P125741	Ripply2	-2.61747	0.0367083
A_66_P134704	Gm4952	-14.3742	4.93339e-05		A_66_P129444	Pnkp	-2.39262	0.000193341		A_66_P129710	Pion	-3.07897	0.00129561		A_66_P125734	Tnip2	2.15314	0.0489542
A_66_P134674	Far1	3.36486	0.00144308		A_66_P129209	Gm12511	-6.38841	0.0098068		A_66_P129619	Gm2011	-2.19453	0.00139093		A_66_P125701	Gm4673	2.03542	0.0218108
A_66_P134474	Ang3	3.38701	5.84433e-05		A_66_P128963	Cyp2d9	-13.9159	0.000198109		A_66_P129377	Gm7644	3.90694	0.0171221		A_66_P125392	Atp8b4	-2.16776	0.00439028
A_66_P134453	I830077J02Rik	4.00013	0.00532271		A_66_P128636	Cd209g	3.00392	0.0179017		A_66_P129263	Lekr1	4.56081	0.0100389		A_66_P124806	Tlr4	2.43698	0.00286125
A_66_P134441	Pcnxl3	2.20797	0.00297748		A_66_P128537	Isg15	3.79155	0.0105802		A_66_P129153	Ptk6	-3.55292	0.00862869		A_66_P124677	Ipcef1	5.00817	0.0256908
A_66_P134394	Pde6c	-9.19245	8.81172e-05		A_66_P128525	Slfn5	-2.69651	0.00949977		A_66_P128942	Mipep	-3.30703	0.0236561		A_66_P124420		-5.15822	0.000430867
A_66_P134383	Gm5079	-2.35042	0.00302856		A_66_P128058	Map7d2	4.96597	0.00677176		A_66_P128923	4930544I03Rik	-3.40665	0.0184208		A_66_P124139	Ikzf1	5.26232	0.000129505
A_66_P134355	Lrrtm3	-2.64335	5.80263e-05		A_66_P127563		2.43926	0.016693		A_66_P128199	Fzd5	-2.7065	0.0019648		A_66_P123209	Vmn1r56	2.61174	0.00976553
A_66_P134297	Olfr978	9.68127	0.00630294		A_66_P127464	Zbed4	4.16457	0.00493259		A_66_P128058	Map7d2	3.02834	0.00823091		A_66_P122828	Spata31	-2.28212	0.0129738
A_66_P134265	Fam47e	-4.25577	0.000189962		A_66_P127411	Acat2	-2.02087	0.00153078		A_66_P127411	Acat2	-2.45664	0.00094581		A_66_P122211	Olfr248	-2.08083	0.0298728
A_66_P134171	Adck1	2.74506	0.00336242		A_66_P127161	Cyp2u1	-5.06092	3.96037e-05		A_66_P127262		-2.13703	0.0205236		A_66_P121446	Gm7969	3.24176	0.008925
A_66_P134090	Grpel2	-2.17899	0.000395907		A_66_P126848	Gm5635	2.54103	0.0257952		A_66_P127161	Cyp2u1	-2.83853	0.00897971		A_66_P121086	Map3k8	2.62423	0.0147815
A_66_P134051	Gm7135	-2.76095	4.7196e-05		A_66_P126640	Car8	-3.48211	0.000670555		A_66_P126877	Vmn1r214	-7.27357	0.00133485		A_66_P121059	Mirg	4.81926	0.0391036
A_66_P133520	Glmn	-3.21003	8.46019e-05		A_66_P126336	4930563M20Rik	5.07993	0.00100475		A_66_P126640	Car8	-10.8851	7.40546e-05		A_66_P120732	Gpr45	-2.74633	0.020285
A_66_P133450	Dnajb9	3.61688	0.000285796		A_66_P126155	Flt3	2.7397	0.0488201		A_66_P126415		2.29195	0.035195		A_66_P120707	Ston2	2.66373	0.0371109
A_66_P133404	2810417H13Rik	3.89721	9.71434e-05		A_66_P126019		3.59991	0.00853909		A_66_P126336	4930563M20Rik	2.52675	0.0333446		A_66_P120603	Trps1	3.16231	0.00931364
A_66_P133270	Mfsd1	-2.55347	0.00017185		A_66_P125741	Ripply2	-3.05742	0.0033272		A_66_P126293	Itgb3	6.73551	6.71235e-05		A_66_P120572	Gm14488	-2.84538	0.00140732
A_66_P133255	Prkch	6.87497	1.50465e-05		A_66_P125709	D930032P07Rik	2.70137	0.00857004		A_66_P126147	Spink5	-3.39952	0.0125001		A_66_P119968	Clec4a1	4.13061	0.00111503
A_66_P133149	Cyp2j8	-2.41621	0.00188864		A_66_P125392	Atp8b4	-4.71629	0.0014567		A_66_P124806	Tlr4	2.83905	0.00552393		A_66_P119350	2310040G24Rik	-2.29283	0.0368375
A_66_P133148	Aoah	9.007	2.522e-05		A_66_P125161	1700057H15Rik	2.51832	0.000291941		A_66_P124724	Rnf19b	-2.73705	0.00765614		A_66_P119034	Pla2g7	7.8716	0.00123437
A_66_P132971	4930429E23Rik	-5.6613	0.00852099		A_66_P125047		-2.03238	0.00307594		A_66_P124659	Mark1	3.91358	0.000974891		A_66_P118989	Zfp644	-2.2734	0.00183297
A_66_P132888	Dhfr	-2.40421	0.00156555		A_66_P124806	Tlr4	2.09661	0.0305619		A_66_P124420		-3.09954	0.00513086		A_66_P118579		-2.89617	0.00664094
A_66_P132870		3.15401	0.00498021		A_66_P124775	Cntnap5b	-2.09499	0.00262707		A_66_P124254	Gm9910	3.67604	0.0260163		A_66_P118165		-2.76784	0.00203625
A_66_P132657	Epha6	-2.21883	0.00706899		A_66_P124677	Ipcef1	2.85224	0.00779287		A_66_P124139	Ikzf1	2.8465	0.00200723		A_66_P116812		-3.04129	0.00555154
A_66_P132249	Akr1c13	-3.40556	0.000252646		A_66_P124420		-2.74964	0.00850773		A_66_P123635	Csf2rb	2.93657	0.00290451		A_66_P116326	Tlcd2	-3.68545	0.0496403
A_66_P132222	Mlph	2.33408	0.0327145		A_66_P124284	Tmem90a	-2.22569	0.00189587		A_66_P123526	4930504D19Rik	-2.29126	0.0085577		A_66_P116250	Efhd2	2.434	0.0320322
A_66_P132218	Gm4430	4.33913	0.0134345		A_66_P124164		3.9795	0.00828948		A_66_P123209	Vmn1r56	2.35486	0.00680517		A_66_P116126	Sdhb	-2.04763	0.00574363
A_66_P132062	Gm5608	4.60227	0.0480226		A_66_P124139	Ikzf1	2.87506	0.0441114		A_66_P122828	Spata31	-3.16538	0.014655		A_66_P115949	Myo9a	2.21177	0.0328192
A_66_P131979	Cdc6	2.32916	0.0280739		A_66_P124114	Adamts17	3.10917	0.011267		A_66_P122621	Gm9889	-4.67887	0.00439539		A_66_P115098	Nfia	3.16748	0.00129863
A_66_P131931	Aurkc	2.49478	7.02941e-05		A_66_P123704	Ulbp1	2.20574	0.0158729		A_66_P122559	Myct1	-2.4298	0.00940013		A_66_P115080		-3.1762	0.0255538
A_66_P131896	Olfr117	-2.36486	8.86375e-05		A_66_P123432	4930447J18Rik	-3.77896	0.0234712		A_66_P122086	9030619P08Rik	-7.56087	0.000983352		A_66_P114784	Pla2g7	3.85739	0.00822718
A_66_P131530	Rpp30	-2.64814	0.00272099		A_66_P123357	Gm829	-2.05046	0.00328202		A_66_P121770	Ilf2	-2.51138	5.88795e-05		A_66_P114768	Bach2	-2.10742	0.0412413
A_66_P131398	Ror2	-2.33237	0.0121768		A_66_P123209	Vmn1r56	3.12841	0.000173626		A_66_P121495	Psat1	3.0642	0.00760896		A_66_P114722	Pdp2	-2.15475	0.00177132
A_66_P131389	Ugt2b38	-5.01542	0.00044608		A_66_P122699	Cux2	12.0025	0.0157281		A_66_P121480	Sardh	-2.58867	0.00245601		A_66_P114700	Kcna7	-2.28484	0.00275325
A_66_P131137		-3.11014	0.00035309		A_66_P122115	Cdhr3	-2.10462	0.00328		A_66_P121459	Cenpa	-2.51678	0.00269609		A_66_P114167	LOC100862627	-2.45879	0.00757479
A_66_P131008	Trpm5	5.44706	0.000629602		A_66_P122086	9030619P08Rik	6.30037	0.000365456		A_66_P121446	Gm7969	8.89181	0.000278812		A_66_P113868	Cdh3	3.2579	0.00510042
A_66_P130960	Psmd11	-2.22091	9.64434e-05		A_66_P121972	Gm8298	-2.14389	0.00267368		A_66_P121086	Map3k8	3.65864	0.00569602		A_66_P113749	Il2rg	3.75271	0.00236325
A_66_P130882	Eif3e	-2.65093	2.15856e-05		A_66_P121933	Klra8	-2.02328	0.00188326		A_66_P121077	Spata24	3.79782	0.0309761		A_66_P113599		-3.05511	0.0269233
A_66_P130663	Gm15628	-2.70665	6.9024e-05		A_66_P121924	A330043C09Rik	-2.09842	0.0324056		A_66_P121059	Mirg	4.4549	0.0142944		A_66_P113268	Mme	-13.3507	0.0021859
A_66_P130650	Gm9979	-2.92948	0.0425225		A_66_P121459	Cenpa	-2.24292	0.00694753		A_66_P121053	Sftpd	2.67623	0.00395952		A_66_P113262	Galnt14	5.24956	0.00559006
A_66_P130528	Olfr582	-2.6246	6.06791e-05		A_66_P121077	Spata24	-3.21334	0.0377159		A_66_P120732	Gpr45	-2.48833	0.00175052		A_66_P113245	Mfng	2.22606	0.0018636
A_66_P130517	Lepr	-2.45862	7.92299e-05		A_66_P121012	Gm6602	-2.35248	0.0368145		A_66_P120603	Trps1	3.16393	0.00103632		A_66_P112816	B4galt6	4.04847	0.00995378
A_66_P130416	Arsb	-2.07479	0.00187744		A_66_P120605	Fbxo34	-2.29614	0.0470877		A_66_P120572	Gm14488	-3.55528	0.000297841		A_66_P112305	Myo1f	5.82366	0.00146761
A_66_P130348	4930520P13Rik	2.2334	0.00986412		A_66_P120603	Trps1	2.70213	0.011478		A_66_P120567	Anxa1	2.92644	0.00351453		A_66_P111781	4930432M17Rik	-2.11122	0.0082947
A_66_P130213		2.09371	0.000115888		A_66_P120472	Pglyrp2	-2.01113	0.000564324		A_66_P120140		-3.82301	0.0325499		A_66_P111660	Mt1	4.26965	0.00502643
A_66_P130115	Fads2	-4.85895	5.26508e-06		A_66_P119968	Clec4a1	2.39926	0.0256764		A_66_P120125	D0H4S114	-9.23043	0.00160583		A_66_P111562	Ccnd1	-2.00945	0.00485834
A_66_P130100	Rab23	-3.21203	0.000899686		A_66_P119771	Nme8	-2.01197	0.00229177		A_66_P119968	Clec4a1	5.21718	0.00124701		A_66_P111011	Gata3	3.57722	0.00572944
A_66_P130067	1700054K19Rik	-2.66346	4.66719e-05		A_66_P119045		-2.24425	0.0272281		A_66_P119884	Wdr91	-2.48879	0.000771948		A_66_P110742		3.25547	0.000549431
A_66_P130035	Klk1b24	-2.17926	0.000145844		A_66_P118989	Zfp644	-3.03036	0.029369		A_66_P119518	Tuba8	5.45117	0.00910437		A_66_P110343	Snx10	2.36446	0.00263237
A_66_P129893	1700047M11Rik	2.34684	0.000193835		A_66_P118772	Tmem136	-2.07154	0.00626241		A_66_P119350	2310040G24Rik	-5.22184	0.000116387		A_66_P110251	Tmem91	-2.07461	0.00853791
A_66_P129800	Rab8b	3.01421	0.000175794		A_66_P118139	Gm11669	2.78179	0.0310536		A_66_P119174	Cmtm6	-2.3342	6.91924e-05		A_66_P110104	Myo18b	-2.0254	0.00485396
A_66_P129769	Sik2	3.87712	0.0118524		A_66_P118123	Gabrg2	-2.12249	0.00159239		A_66_P119034	Pla2g7	19.3602	0.000261371		A_66_P109986	Cd33	6.29735	0.00710227
A_66_P129730	Pdia3	2.01843	0.00939286		A_66_P117727	Lipo4	3.17131	0.000429811		A_66_P118772	Tmem136	3.44183	0.0137299		A_66_P109802	Ces3b	-3.07484	0.009239
A_66_P129622	Phldb3	-3.00562	0.000414967		A_66_P117477	Dlk1	2.29192	0.00350567		A_66_P118600	Lama1	-2.60822	0.00123129		A_66_P109474	Rtn4ip1	-2.17808	0.00193098
A_66_P129619	Gm2011	-2.1487	0.00153283		A_66_P116597		-2.44594	0.00153776		A_66_P118579		-2.34508	0.014447		A_66_P108793	Gm7628	2.29715	0.013375
A_66_P129484	Tmed9	2.68376	0.0275255		A_66_P116451	2210039B01Rik	-2.27774	0.0107472		A_66_P118165		-2.11474	0.00690071		A_66_P108692		-2.36138	0.000605213
A_66_P129444	Pnkp	-2.76638	0.000256607		A_66_P116326	Tlcd2	-3.09224	0.0124928		A_66_P118091	Tor3a	2.94173	0.00105949		A_66_P108603	E030018B13Rik	13.1613	0.0128183
A_66_P129427		-2.25371	0.00201427		A_66_P116250	Efhd2	2.59554	0.0128168		A_66_P117727	Lipo4	2.02883	0.0163835		A_66_P108247	Ucp3	3.80635	0.000962956
A_66_P129263	Lekr1	2.21475	0.017967		A_66_P116226	Tpgs2	-3.011	0.0107162		A_66_P117417	Pvrl3	-2.13547	0.000388784		A_66_P108059	Ttc39c	-2.24315	0.0209038
A_66_P129209	Gm12511	-6.06839	0.011882		A_66_P116206	Defb3	-2.15728	0.00278093		A_66_P116860	5031434O11Rik	6.89195	0.0179502		A_66_P107583	Rhox3a	-2.26188	0.0348116
A_66_P129153	Ptk6	-7.82686	0.00853832		A_66_P116092	Ints9	2.74163	0.000985601		A_66_P116326	Tlcd2	-7.12675	3.1464e-05		A_66_P107174		-2.10325	0.0125435
A_66_P128963	Cyp2d9	-23.0326	4.3502e-07		A_66_P115056	Gpn1	-2.46303	0.000487424		A_66_P116250	Efhd2	4.48826	0.0180395		A_66_P107129	3300005D01Rik	2.05617	0.0398679
A_66_P128942	Mipep	-2.06457	5.15129e-05		A_66_P114582		-2.12928	0.000962131		A_66_P116226	Tpgs2	-4.24837	0.00927886		A_66_P106983	Gm3916	-3.10297	0.0499779
A_66_P128918	Hacl1	-2.78349	7.09651e-05		A_66_P114558	Krtap1-3	-2.20763	0.00269365		A_66_P116126	Sdhb	-2.32904	0.00290766		A_66_P106789		4.82711	0.000373531
A_66_P128537	Isg15	3.84827	0.000663612		A_66_P114381	Ypel2	-2.6828	0.00766518		A_66_P115949	Myo9a	2.49487	0.0319221		A_66_P106744	Syce3	-4.89843	0.00590732
A_66_P128446	Ttpa	-2.11066	0.000578743		A_66_P114054	Sco2	-2.99521	0.00764628		A_66_P115098	Nfia	3.06722	0.00483757		A_66_P106572	Olfr156	-3.10495	0.00341741
A_66_P128128		2.50302	0.0309175		A_66_P113892	Smim6	2.19681	0.000650937		A_66_P114797		-2.49497	0.000495117		A_66_P106385	Daf2	2.67738	0.020585
A_66_P128058	Map7d2	10.3913	0.0012536		A_66_P113868	Cdh3	5.6331	0.00252949		A_66_P114784	Pla2g7	9.99987	0.0025272		A_66_P106238	Gm5106	-2.35569	0.0464731
A_66_P127969	Bcat1	2.16792	0.0413217		A_66_P113818	Lca5	-3.23756	0.0465569		A_66_P114722	Pdp2	-2.20783	0.0230476		A_66_P106148	Raet1c	-2.1436	0.0255461
A_66_P127563		2.70169	0.00758058		A_66_P113749	Il2rg	3.56329	0.0382941		A_66_P114700	Kcna7	-2.94716	0.00344249		A_66_P105830	1700028B04Rik	-2.00369	0.00105613
A_66_P127464	Zbed4	4.42078	0.000760865		A_66_P113498	Gm2668	-2.34767	0.00984156		A_66_P114167	LOC100862627	-3.68545	0.00829545		A_66_P105270	Hao1	-2.2362	0.00201071
A_66_P127411	Acat2	-2.05666	0.0085698		A_66_P113490	Sh2b2	2.18118	0.000182279		A_66_P113892	Smim6	-3.37559	0.000827111		A_66_P105074	Enpp5	-2.07936	0.00907544
A_66_P127161	Cyp2u1	-6.45738	0.003255		A_66_P113262	Galnt14	9.06487	0.0402828		A_66_P113868	Cdh3	3.70339	0.00220988		A_66_P104980	Tceal5	5.62539	0.0317937
A_66_P126877	Vmn1r214	-2.12187	0.000873042		A_66_P113141	Gm9878	-3.35005	0.0434752		A_66_P113662	Tmem62	2.87861	0.00611959		A_66_P104945	Krt24	2.58699	0.012316
A_66_P126819	Gm10851	-2.42199	0.000139755		A_66_P112816	B4galt6	4.01272	0.0146611		A_66_P113599		-3.17404	0.00447618		A_66_P104296	1700112E06Rik	3.27942	0.00804268
A_66_P126640	Car8	-4.93802	0.000311621		A_66_P112797	Olfr825	-2.07871	0.00226983		A_66_P113268	Mme	-21.9554	9.07073e-05		A_66_P103027	Clec9a	3.35457	0.00223941
A_66_P126586	Gm7963	-2.16559	0.00423936		A_66_P112664	Rgsl1	-2.06889	0.00286776		A_66_P113262	Galnt14	8.029	0.00154806		A_66_P102722	Bsph1	2.3998	0.0421909
A_66_P126485	Fam69a	-2.6314	0.00154661		A_66_P112532	Olfr292	-2.07079	0.00162902		A_66_P112853	Eif1a	2.86911	0.000290417		A_66_P102374	Calb1	2.98644	0.0066846
A_66_P126416	Gm11426	-2.79291	2.39222e-05		A_66_P111660	Mt1	4.05981	0.00537181		A_66_P112816	B4galt6	8.17597	0.00288457		A_66_P102250	Gcsh	-2.66488	0.00631761
A_66_P126336	4930563M20Rik	7.10882	0.000377646		A_66_P111584		-2.00269	0.00670868		A_66_P112551	Shf	-2.18398	0.00060809		A_66_P101930	Lce3b	-2.20805	0.00215233
A_66_P126313	Rhof	2.37878	0.00875903		A_66_P111562	Ccnd1	2.02071	0.0330594		A_66_P112495	Scn4b	-3.83981	0.00582143		A_66_P101879	Cyp2u1	-3.58319	0.00120921
A_66_P126293	Itgb3	9.55833	2.26696e-05		A_66_P111426	Lce1a2	2.20914	0.0019115		A_66_P112482	Tmem184c	2.71817	8.46633e-05		A_66_P101835	Cd38	2.80437	0.00559898
A_66_P126155	Flt3	6.42661	0.00509527		A_66_P111301	Mplkip	-2.17304	0.00198096		A_66_P112461		-2.02582	0.00945683		A_66_P101703	Krtap5-5	-2.11151	0.0254227
A_66_P126019		3.69625	0.00801666		A_66_P111224		-2.15002	0.00301039		A_66_P112305	Myo1f	4.40989	0.00253817		A_66_P101394	Gm11190	-3.28589	0.0202077
A_66_P125973	1700025N23Rik	-4.00367	0.0263899		A_66_P111090	Sctr	2.05247	0.0451904		A_66_P111858		-2.12868	0.000963345		A_66_P101013	Tssk4	-2.3923	0.00386193
A_66_P125925	Cntn2	2.36108	0.00456465		A_66_P111035	Epb4.1l5	-2.35044	0.00318097		A_66_P111781	4930432M17Rik	-2.36747	0.00271299		A_66_P100853		4.01877	0.00858667
A_66_P125741	Ripply2	-2.34493	0.00952197		A_66_P110881	Prr16	-2.1136	0.0326202		A_66_P111660	Mt1	5.08515	0.00369683		A_66_P100840		-2.16152	0.00379939
A_66_P125734	Tnip2	2.48601	0.000299232		A_66_P110798	Rn45s	-2.3612	0.00402977		A_66_P111562	Ccnd1	-3.69095	0.00149009		A_65_P20799	Abi2	2.82429	0.0354059
A_66_P125722	Cyb5	-2.06027	0.00376542		A_66_P110687	Taf1a	-2.01171	0.0162564		A_66_P111011	Gata3	5.27352	0.00398705		A_65_P20641	Fads2	-2.7271	0.0356372
A_66_P125709	D930032P07Rik	4.17255	0.000380116		A_66_P110633	Apol9b	2.56655	0.0047347		A_66_P110742		7.81726	0.000392169		A_65_P20249	Prkcb	3.34079	0.00351628
A_66_P125392	Atp8b4	-2.56627	0.00760617		A_66_P110532	Zfp945	-2.67999	0.0298311		A_66_P110633	Apol9b	-8.34852	2.99633e-06		A_65_P19933	Zdhhc23	2.26085	0.0469908
A_66_P125209	Kif2c	2.00833	0.0156213		A_66_P110425	Kif6	-4.65062	0.0153629		A_66_P110343	Snx10	3.29531	0.00464864		A_65_P19832	Ttr	-2.17766	0.010291
A_66_P125161	1700057H15Rik	3.13901	6.09134e-05		A_66_P110343	Snx10	2.16742	0.02127		A_66_P110251	Tmem91	-2.0678	0.00306105		A_65_P19089	Esrrg	-4.38974	0.041398
A_66_P125035	Duxbl2	-4.38045	0.0498745		A_66_P109986	Cd33	4.17735	0.00360462		A_66_P110161	Eppk1	2.14362	5.42623e-05		A_65_P18948	Ppm1h	2.25284	0.000313187
A_66_P124866	Dcdc2c	-2.75934	0.00293136		A_66_P109802	Ces3b	-2.81312	0.00602001		A_66_P109986	Cd33	12.3781	2.21854e-05		A_65_P17476	Gse1	2.23168	0.0402647
A_66_P124806	Tlr4	2.19834	0.00219347		A_66_P109474	Rtn4ip1	-2.66917	0.000232161		A_66_P109978	Bnip2	2.2823	0.0393495		A_65_P17218	Mndal	2.03511	0.0134633
A_66_P124775	Cntnap5b	-2.60313	7.59882e-05		A_66_P109471	Olfr293	-2.39173	0.000655989		A_66_P109802	Ces3b	-7.31373	0.000291989		A_65_P15245	Nrp2	2.62557	0.000367677
A_66_P124677	Ipcef1	3.36562	3.06532e-05		A_66_P109460	Mtfr2	-2.31187	0.00106173		A_66_P109800	Gcsh	-2.04812	0.00114288		A_65_P13527	Osbpl8	-2.09274	0.00650171
A_66_P124420		-4.89817	0.000734442		A_66_P109080	Lrguk	-2.0916	0.00295289		A_66_P109681		33.8312	0.0301897		A_65_P13459	Cd300lb	3.89561	0.013361
A_66_P124254	Gm9910	3.50822	0.0106129		A_66_P108979	Olfr1535	-3.09657	0.00873645		A_66_P109474	Rtn4ip1	-2.30634	0.000906179		A_65_P12104	Tmtc1	2.32003	0.0184802
A_66_P124164		3.69737	0.00286225		A_66_P108636	Defb4	-2.58008	0.00179627		A_66_P109220	Mettl20	2.6816	0.0242529		A_65_P11092	Tspan15	3.62725	0.000964126
A_66_P124139	Ikzf1	5.81873	0.000223448		A_66_P108622	Gtpbp10	-2.04258	0.000156922		A_66_P109012	Gm715	-3.7621	0.00406255		A_65_P09285	2610524H06Rik	4.95798	0.037334
A_66_P124114	Adamts17	5.28641	0.00167481		A_66_P108609	LOC101055871	-2.00273	0.00311068		A_66_P108810	Reln	-2.60313	0.00195918		A_65_P08507	Adam23	4.16818	0.00163687
A_66_P123824	Sorl1	2.25846	0.00288544		A_66_P108474	Gm19843	2.3479	0.0242648		A_66_P108692		-2.05745	0.00173459		A_65_P06603	Ahr	2.29017	0.00418008
A_66_P123743		-2.38478	7.21471e-05		A_66_P108380	A330021E22Rik	4.00124	0.0131525		A_66_P108603	E030018B13Rik	169.651	9.60911e-05		A_65_P06147	Fgfr3	-2.75718	0.0023982
A_66_P123704	Ulbp1	3.14864	0.00422324		A_66_P108059	Ttc39c	-7.47546	0.00229603		A_66_P108380	A330021E22Rik	8.16619	0.00684445		A_65_P03022	Cdc14b	-2.13592	0.00504122
A_66_P123635	Csf2rb	2.50762	2.40401e-06		A_66_P107745	1110020A21Rik	-2.84887	0.00158792		A_66_P108247	Ucp3	6.14228	0.000279458		A_65_P02177	Gstm4	-4.34391	0.00126858
A_66_P123527	Ndufb4	-2.00266	0.000924594		A_66_P107379	Mdk	2.14936	0.0161495		A_66_P108188	Car5a	-7.71825	6.70911e-05		A_55_P2472435	Gbp3	3.06074	0.00444517
A_66_P123448	Pigx	-2.19552	0.000261345		A_66_P107231	Loxl4	-3.01513	0.0416572		A_66_P108152	Cbr1	-2.00891	0.000295534		A_55_P2467450		-2.51569	0.000426774
A_66_P123432	4930447J18Rik	-5.13954	0.0297625		A_66_P107129	3300005D01Rik	2.25262	0.0043134		A_66_P108059	Ttc39c	-3.74097	0.00156366		A_55_P2452259	Gls	2.21064	0.0032178
A_66_P123209	Vmn1r56	3.45314	5.90367e-05		A_66_P106948	Gm9926	-2.97579	0.0049885		A_66_P107745	1110020A21Rik	-2.61447	4.91451e-05		A_55_P2427377	3110068a07rik	-2.15084	0.00715371
A_66_P122468		-2.34173	0.000390547		A_66_P106760	Adam32	-3.29834	0.020327		A_66_P107484	Trbv13-1	-2.18921	0.0225788		A_55_P2425938	2810468N07Rik	2.04865	0.00685873
A_66_P122317	Gm10091	2.40937	0.0107898		A_66_P106750	Magi2	2.35857	0.00563934		A_66_P107437	Sfxn5	-3.62615	0.00359018		A_55_P2422650	5031425E22Rik	-2.09255	0.00381634
A_66_P122290	Mettl8	-3.41706	2.87938e-05		A_66_P106661	Slc7a1	2.33638	0.0482855		A_66_P107038	Prcp	2.00301	0.00147168		A_55_P2422074	BC025933	-3.50505	0.00274728
A_66_P121976	Slc4a11	-3.27066	0.0231751		A_66_P106421	Ccdc30	-2.67367	0.00453432		A_66_P106760	Adam32	-4.83581	0.0322739		A_55_P2421597	Tnc	-2.01615	0.00419195
A_66_P121933	Klra8	-2.49531	9.78217e-05		A_66_P106090	Rpa3	-2.14901	0.000136327		A_66_P106744	Syce3	-3.45784	0.00879508		A_55_P2420724	AL118220	-3.1428	0.0016819
A_66_P121924	A330043C09Rik	-2.96306	0.00278418		A_66_P105784	Rag2	-2.15518	0.00181623		A_66_P106611	Gna14	-3.15106	0.0020015		A_55_P2419495	1110028F11Rik	-2.34106	0.0367761
A_66_P121623	Rsrc1	-2.472	0.00607018		A_66_P105736	Net1	-2.18287	0.0207568		A_66_P106525	AI427809	-2.30383	0.00727326		A_55_P2417224	AI447881	2.45373	0.0329562
A_66_P121502	Gm5485	-2.43527	0.000140632		A_66_P105270	Hao1	-3.20423	0.00143358		A_66_P106421	Ccdc30	-3.29285	0.0328818		A_55_P2417003		-2.89619	0.0119229
A_66_P121480	Sardh	-2.68216	0.000761276		A_66_P105234	Olfr1049	-2.01984	0.0028954		A_66_P106090	Rpa3	-2.51758	7.65749e-05		A_55_P2416494	8430426J06Rik	2.49687	0.0206714
A_66_P121459	Cenpa	-3.28694	0.00124524		A_66_P105074	Enpp5	-2.00441	0.00486484		A_66_P105270	Hao1	-2.1133	0.00603456		A_55_P2415701	4930518P08Rik	-3.39897	0.0468625
A_66_P121193	Gm7480	2.03556	0.0176173		A_66_P104945	Krt24	5.82341	4.66392e-05		A_66_P105074	Enpp5	-2.01657	0.00163583		A_55_P2412349	AW111846	-2.71292	0.00812206
A_66_P121117	Serpina1d	-2.58244	0.00100639		A_66_P104559	4932413F04Rik	2.41847	0.00723363		A_66_P104980	Tceal5	54.7779	0.000477181		A_55_P2410875	C030037D09Rik	-3.17051	0.000184127
A_66_P121086	Map3k8	3.81859	0.00671311		A_66_P104473	Polg2	-2.18142	0.00687778		A_66_P104296	1700112E06Rik	3.51792	0.0361632		A_55_P2406852	Lix1	2.31009	0.0470319
A_66_P121077	Spata24	-4.01821	0.0010244		A_66_P104301	Acpt	-2.04916	0.00327652		A_66_P104134	Homer1	-2.00936	0.00255674		A_55_P2404808	2210406H18Rik	3.66464	0.0128187
A_66_P121059	Mirg	4.50751	0.000121464		A_66_P104296	1700112E06Rik	4.17216	0.034207		A_66_P103027	Clec9a	2.32546	0.00952623		A_55_P2403453	BC037032	-2.26816	0.000835771
A_66_P121012	Gm6602	-2.90262	0.0149681		A_66_P104180	2310015D24Rik	-2.53706	0.0313538		A_66_P102722	Bsph1	2.99446	0.0269855		A_55_P2402929	B430203I24Rik	2.19446	0.0312863
A_66_P120736	Bnip3	-2.2266	0.00373137		A_66_P103231		2.04376	0.0110837		A_66_P102374	Calb1	4.69158	0.00150237		A_55_P2399688	Glipr2	4.9778	0.00398934
A_66_P120605	Fbxo34	-2.55865	0.00259536		A_66_P102879	Thra	-2.06865	0.0060681		A_66_P102250	Gcsh	-5.51116	0.0179504		A_55_P2387915	Gm10804	-3.22352	0.00536674
A_66_P120603	Trps1	4.99694	0.000427074		A_66_P102722	Bsph1	5.25166	0.0115215		A_66_P101930	Lce3b	-3.12922	0.00532239		A_55_P2384009	C81489	5.1839	0.0172524
A_66_P120494	Duoxa1	2.85475	0.000829534		A_66_P102657		-2.05097	0.0032985		A_66_P101879	Cyp2u1	-3.56323	0.00308547		A_55_P2383283	2310001H17Rik	-2.26418	0.00100804
A_66_P120472	Pglyrp2	-2.68079	3.49337e-05		A_66_P102374	Calb1	3.24173	0.014678		A_66_P101835	Cd38	3.31895	0.0073916		A_55_P2383248	4930422N03Rik	4.46141	0.000909476
A_66_P120380	Apol10b	3.72295	0.00542064		A_66_P102265	1700119I11Rik	-2.10716	0.00247675		A_66_P101536		2.40701	0.00309972		A_55_P2376547	4930558K02Rik	3.2553	0.0415814
A_66_P120125	D0H4S114	-2.79457	0.00220354		A_66_P102110		-4.74552	0.0196416		A_66_P101407	Acat3	-2.45417	9.00517e-05		A_55_P2372528	4122401K19Rik	-6.55511	0.0266334
A_66_P120003		-2.82297	0.000567427		A_66_P101942	Gm9706	2.59774	0.0313899		A_66_P100419		-8.19257	0.000301222		A_55_P2372228	A430104N18Rik	7.04967	0.00516006
A_66_P119968	Clec4a1	5.10819	0.000210458		A_66_P101879	Cyp2u1	-2.98995	0.000399501		A_65_P20641	Fads2	-2.83302	0.0248765		A_55_P2370250	Syn3	-2.23143	0.00178184
A_66_P119812	Gm9981	-2.24698	0.00247777		A_66_P101563	Krtap13	-2.27635	0.00123378		A_65_P20249	Prkcb	2.63713	0.00887962		A_55_P2369191	Ggta1	2.48446	0.0416651
A_66_P119771	Nme8	-2.56396	3.13981e-05		A_66_P101407	Acat3	-2.15389	0.000165514		A_65_P20167	Hyou1	2.1956	0.0272794		A_55_P2367007	C330020G15Rik	-3.18751	0.0262616
A_66_P119350	2310040G24Rik	-3.55707	5.0626e-05		A_66_P101393	A530001N23Rik	-3.60355	0.0390191		A_65_P19933	Zdhhc23	2.1949	0.0415172		A_55_P2364916	8030402F09Rik	2.17885	0.00267836
A_66_P119174	Cmtm6	-2.30557	6.90307e-05		A_66_P101380	D430020J02Rik	-9.84569	0.00129281		A_65_P19089	Esrrg	-3.85601	0.00446268		A_55_P2362096	4921516I12Rik	-3.21765	0.00285486
A_66_P119034	Pla2g7	4.65157	0.00255832		A_66_P101261	Gm3367	-2.47478	0.0095131		A_65_P17602	Pgm5	-3.34702	0.000647589		A_55_P2361652	LOC101056045	2.71999	0.00467361
A_66_P118989	Zfp644	-4.35667	0.000377589		A_66_P101192	Dppa4	-2.00472	0.00314581		A_65_P16796	Psd4	2.30442	0.00615316		A_55_P2358399	1700111N16Rik	-3.04369	0.031079
A_66_P118741	Vmn1r37	-4.58835	0.00251347		A_66_P100451	1700074P13Rik	-2.99539	0.0172587		A_65_P16688	Taok2	2.19003	0.00306482		A_55_P2357254	5330430P22Rik	-2.40204	0.0305236
A_66_P118579		-2.18125	0.00421536		A_66_P100268		2.3089	0.00203742		A_65_P16483	Pdzk1	-2.03882	0.0117712		A_55_P2356840	1600020E01Rik	3.17188	0.00537382
A_66_P118513	42989	2.84909	0.000201656		A_66_P100029	Klra7	-4.32824	0.0033793		A_65_P15875	Chpf2	2.20224	0.0105651		A_55_P2354296	1700028E10Rik	2.16996	0.00214574
A_66_P118430	Slc17a2	2.76982	0.00708554		A_65_P20249	Prkcb	2.19368	0.0386123		A_65_P14951	Cblb	2.05589	0.00494461		A_55_P2351193	Snora47	-3.90286	0.00573122
A_66_P118139	Gm11669	6.2549	0.00332743		A_65_P19933	Zdhhc23	2.32743	0.027802		A_65_P13527	Osbpl8	-2.70727	0.000196659		A_55_P2350553	4933405D12Rik	-3.66617	0.0108989
A_66_P118004	Rab3ip	-2.15869	0.000344984		A_65_P19832	Ttr	-2.07137	0.0168725		A_65_P13459	Cd300lb	2.08121	0.0419413		A_55_P2348948	4933413C19Rik	3.72004	0.0396045
A_66_P117727	Lipo4	5.70128	0.0382918		A_65_P19089	Esrrg	-2.68294	0.0393419		A_65_P12104	Tmtc1	3.69431	0.00475138		A_55_P2347756	AU040972	3.0287	6.27461e-05
A_66_P117682		-2.04348	0.000134661		A_65_P18935	Grin1	3.40879	2.07426e-05		A_65_P11773	Adi1	-2.00193	0.00112707		A_55_P2347384	D430040L24Rik	3.10725	0.00707156
A_66_P117578	Mtmr7	-3.80315	0.00125309		A_65_P17869	Rpf1	2.37304	0.0215504		A_65_P11632	Usp14	-2.46708	0.000852171		A_55_P2345116	1700109K24Rik	2.18624	0.0373689
A_66_P117477	Dlk1	3.21469	0.000483338		A_65_P17602	Pgm5	-2.34884	0.0143036		A_65_P11092	Tspan15	2.234	0.0106729		A_55_P2344598	E330037I15Rik	2.82916	0.00761341
A_66_P117248	C330022B21Rik	-2.71374	4.13125e-05		A_65_P16750	Psma8	-2.87951	0.0388637		A_65_P08507	Adam23	3.96571	0.000560271		A_55_P2344244	4930556H04Rik	-2.57052	0.0465121
A_66_P116912	Tia1	3.2105	0.049445		A_65_P16688	Taok2	2.26791	0.00194435		A_65_P08465	Tlk2	2.08309	0.00201896		A_55_P2337074	Mid1	3.52048	0.00288847
A_66_P116812		-2.42821	0.00939293		A_65_P16680	B4galt5	2.23547	0.00125177		A_65_P06872	Fam210a	-2.67517	0.00153899		A_55_P2337073	Mid1	5.34424	0.0050767
A_66_P116678	Rps8	-2.13281	0.00168307		A_65_P16208	Baz1a	2.14013	0.0228819		A_65_P06147	Fgfr3	-2.88299	0.00136257		A_55_P2337033	2310065F04Rik	-2.04663	0.00651685
A_66_P116597		-3.03369	0.000108343		A_65_P15518	Arfgap1	3.01059	0.028999		A_65_P03022	Cdc14b	-2.93542	0.000941835		A_55_P2336173	Mirg	11.7212	0.0145754
A_66_P116451	2210039B01Rik	-4.5549	0.00157891		A_65_P15245	Nrp2	4.48177	0.00033332		A_65_P02327	Pogk	-2.01341	0.0346931		A_55_P2334684	Rsf1	-2.18723	0.0144969
A_66_P116360		-2.43785	0.000912538		A_65_P14834	9530059O14Rik	-2.25305	0.00186545		A_65_P02177	Gstm4	-7.52454	0.00072589		A_55_P2334424	D630024D03Rik	-3.7115	0.00432061
A_66_P116326	Tlcd2	-8.00654	1.16116e-06		A_65_P12955	Sec16a	2.21516	0.020749		A_65_P01991	Prrg4	7.52046	0.000977881		A_55_P2334097		-2.47102	0.0488277
A_66_P116250	Efhd2	2.17272	0.0278947		A_65_P11853	Arhgap28	-2.04273	0.0225055		A_55_P2449750	1700047I17Rik2	2.72879	0.00283439		A_55_P2332194	Gm15998	2.86376	0.0179943
A_66_P116226	Tpgs2	-3.07137	0.0331038		A_65_P11216		2.94129	0.00291046		A_55_P2444515	Akap2	2.00478	0.00791933		A_55_P2331974		-2.40822	0.000110304
A_66_P116126	Sdhb	-2.52373	0.000800003		A_65_P10491	Raph1	2.91606	0.00128967		A_55_P2438722	Ifnar1	2.27857	0.0243267		A_55_P2330545	Zfp81	-2.47699	0.00276285
A_66_P116092	Ints9	3.3591	0.0125215		A_65_P07450	Brd8	3.50142	0.046336		A_55_P2431862	Srpk2	-2.12567	0.00102089		A_55_P2329180	Ccdc148	2.01997	0.0021572
A_66_P115996	Ccbl1	-2.75354	0.00367466		A_65_P07038	Ddx20	-2.00223	0.0171124		A_55_P2427685	Agl	-2.1521	7.31869e-05		A_55_P2328647	4930567K12Rik	-2.39583	0.0119079
A_66_P115949	Myo9a	3.52915	0.00178312		A_65_P06872	Fam210a	-2.02316	0.00301578		A_55_P2426941	Gprin3	-2.7245	0.00163776		A_55_P2327769	Il13ra2	2.68749	0.00973695
A_66_P115699	Olfr980	-2.91367	0.0084039		A_65_P05396	Rad18	-2.08037	0.0108547		A_55_P2425938	2810468N07Rik	2.75423	0.00863821		A_55_P2326260	4930525G20Rik	-3.25622	0.00310995
A_66_P115539	Gm11240	-2.42442	0.00308437		A_65_P04961	Ntrk2	3.32727	0.0359421		A_55_P2425661	1200014J11Rik	-2.52583	0.00116714		A_55_P2325038	Acsm2	-3.8214	0.0205458
A_66_P115098	Nfia	2.63685	0.00475401		A_65_P04827	Cwc25	3.30756	0.00327103		A_55_P2424988	C78228	6.5505	0.035878		A_55_P2324425	5830403F22Rik	-2.39335	0.0016441
A_66_P115056	Gpn1	-3.07677	0.00170477		A_65_P03874	Nav2	2.0492	0.0281033		A_55_P2424767	Hecw1	2.48894	0.0408872		A_55_P2322064	F830005D05Rik	8.44036	0.0022997
A_66_P114804	Gm7325	2.25757	0.0082699		A_65_P03022	Cdc14b	-2.19115	0.00380262		A_55_P2423463	5730433K22Rik	2.41359	0.0492209		A_55_P2320283	Hmga2-ps1	2.39312	0.00295212
A_66_P114722	Pdp2	-2.42542	0.0124701		A_65_P02323	Sec22b	2.98632	0.00258342		A_55_P2422164	C130093G08Rik	4.16609	0.00371918		A_55_P2318934	1200007C13Rik	6.18949	0.00685737
A_66_P114616	Gm13498	-2.83898	0.00850446		A_65_P02321	Usp36	2.17994	0.00862228		A_55_P2422074	BC025933	-3.08215	0.00108013		A_55_P2318584	Aqp8	-11.6195	0.0194022
A_66_P114589	4930597O21Rik	2.51083	0.0153553		A_65_P02177	Gstm4	-2.92246	0.00807308		A_55_P2420724	AL118220	-2.18222	0.0451183		A_55_P2317570	1700051A21Rik	2.54833	0.0229265
A_66_P114582		-2.63929	7.71466e-05		A_65_P02171	C2cd5	-2.11609	0.00312614		A_55_P2419495	1110028F11Rik	-2.71335	0.0362138		A_55_P2316783	Grm5	-2.71204	0.00979046
A_66_P114445		-5.49076	0.0109361		A_55_P2472435	Gbp3	3.09261	0.0176804		A_55_P2417224	AI447881	2.43695	0.0353897		A_55_P2308743	A430106A12Rik	2.17921	0.000337982
A_66_P114307		-3.79149	0.0424375		A_55_P2465382		4.20666	0.0116594		A_55_P2416494	8430426J06Rik	4.91103	0.000475627		A_55_P2308738	Mb21d2	2.43921	0.00104017
A_66_P114054	Sco2	-3.31715	0.00276769		A_55_P2452259	Gls	2.06698	0.0201435		A_55_P2415472	4931408D14Rik	-2.54803	0.00388822		A_55_P2303972	D830044D21Rik	-3.63694	0.0180518
A_66_P113868	Cdh3	15.9695	0.00116079		A_55_P2449750	1700047I17Rik2	2.76205	0.00177933		A_55_P2412349	AW111846	-4.66592	0.000899079		A_55_P2303868	5033421B08Rik	-2.67459	0.00747925
A_66_P113749	Il2rg	7.55945	4.98069e-05		A_55_P2435613	Xpo7	2.33878	0.0237312		A_55_P2412319	A830052D11Rik	-3.79536	0.000258471		A_55_P2300661	AW050198	-2.31785	0.0022844
A_66_P113659	Ripply1	2.21265	0.0115683		A_55_P2431862	Srpk2	-2.14105	0.000983772		A_55_P2408415	Kcnq1ot1	2.97255	0.0107323		A_55_P2295786	Fam63b	-2.97749	0.0490947
A_66_P113599		-2.98183	0.00953241		A_55_P2429225	Psrc1	-2.33098	0.0422368		A_55_P2407751	Tomm20l	3.33388	0.0492494		A_55_P2293013	Ces2a	-5.46532	0.0112287
A_66_P113556	Wnt16	2.07163	0.00928241		A_55_P2426799	D530017H19Rik	2.6252	0.00623596		A_55_P2406852	Lix1	2.14913	0.0315519		A_55_P2289819	Cd163	15.3443	0.00540779
A_66_P113487	Pacsin2	-2.04754	6.13332e-06		A_55_P2425442	D030036P13Rik	-2.28994	0.0306762		A_55_P2404808	2210406H18Rik	5.88188	0.0437228		A_55_P2289770	Scamp1	2.34108	0.0393588
A_66_P113268	Mme	-7.41113	0.00199303		A_55_P2424767	Hecw1	-2.49884	0.0343223		A_55_P2403453	BC037032	-2.25984	0.00077242		A_55_P2289040	AI429363	3.43027	0.0123149
A_66_P113262	Galnt14	19.6193	0.000344692		A_55_P2423616	2900057C01Rik	4.60752	7.04275e-05		A_55_P2402929	B430203I24Rik	2.00494	0.0305717		A_55_P2288690	1700066J03Rik	-2.36196	0.0199501
A_66_P112853	Eif1a	2.21761	0.000601383		A_55_P2423586	Eya1	-2.77515	0.0192831		A_55_P2399688	Glipr2	3.47261	0.0070565		A_55_P2282904		-3.09654	0.00826991
A_66_P112816	B4galt6	4.7763	0.00610061		A_55_P2422650	5031425E22Rik	-4.36655	0.0147784		A_55_P2399499	B930025P03Rik	5.25351	0.00348023		A_55_P2279824	AW492981	-2.31975	0.0220216
A_66_P112797	Olfr825	-2.57688	7.6065e-05		A_55_P2422438		-3.8144	0.00184746		A_55_P2398264	LOC552912	-2.46867	0.0129004		A_55_P2279685	2900076A07Rik	-2.64871	0.00935279
A_66_P112623	Psmc6	-2.06234	0.000478036		A_55_P2421597	Tnc	-4.66103	0.000409555		A_55_P2397400		3.56896	0.00122578		A_55_P2279140	F830014O18Rik	4.19897	0.0473997
A_66_P112573	Isg20	3.89007	0.00199075		A_55_P2420983	6330575P09Rik	3.57581	0.00321708		A_55_P2395911	D2Ertd295e	3.43878	0.0160739		A_55_P2278727	Gm2085	-2.60804	0.0232392
A_66_P112551	Shf	-2.65339	1.40327e-05		A_55_P2420928	2900016J10Rik	2.50037	0.0176147		A_55_P2394308	Fst	2.62005	0.0241477		A_55_P2277171	Gm10134	3.83153	0.0035585
A_66_P112532	Olfr292	-2.56268	8.65235e-05		A_55_P2420694		-5.9981	0.00540701		A_55_P2391534	4930459C07Rik	3.88624	0.0498544		A_55_P2275109	9530034A14Rik	-2.13612	0.00365947
A_66_P112305	Myo1f	7.77947	0.000479802		A_55_P2420591	2010001M06Rik	-3.13161	0.00457624		A_55_P2389900	Gpr64	3.52765	0.03755		A_55_P2272221		-2.15452	0.00578744
A_66_P111858		-2.18048	0.000165373		A_55_P2418745	D230034L24Rik	2.53001	0.0330784		A_55_P2385148	Gm14634	2.32648	0.029318		A_55_P2266178	AI790276	11.1258	0.000275727
A_66_P111798	Znrf2	-2.0507	4.79584e-05		A_55_P2418581	4930539C22Rik	-2.51438	0.00546238		A_55_P2384009	C81489	7.99745	0.00105688		A_55_P2263342	1700029M20Rik	-2.53745	0.0405266
A_66_P111747	Pgk1	-2.40507	3.29837e-05		A_55_P2416097	A130082J08Rik	3.54258	0.0267453		A_55_P2383897		3.36373	0.0445757		A_55_P2262081	4930563F15Rik	2.86918	0.0279786
A_66_P111660	Mt1	4.53367	0.00414977		A_55_P2415910	9330199F22Rik	-2.1682	0.00159595		A_55_P2383283	2310001H17Rik	-5.03772	0.000242851		A_55_P2261772	C230098O21Rik	2.14115	0.0143596
A_66_P111601		-2.69121	0.000111419		A_55_P2415701	4930518P08Rik	-3.55463	0.0379779		A_55_P2383248	4930422N03Rik	4.82755	0.000395429		A_55_P2258832	5230400M03Rik	2.72116	0.00821067
A_66_P111584		-2.01604	0.0409061		A_55_P2415387	Lrriq4	-4.32554	0.00308692		A_55_P2381926	Jam2	2.17307	0.0447908		A_55_P2258366	C030009H01Rik	-2.04362	0.00710457
A_66_P111515	LOC101055727	-2.5721	8.87506e-05		A_55_P2415029		2.19071	0.0126227		A_55_P2381821	6430706H07Rik	5.2639	0.0253427		A_55_P2258261	1810008I18Rik	-2.42682	0.0294314
A_66_P111426	Lce1a2	2.46597	0.00101374		A_55_P2413964	1700048M11Rik	2.58466	0.0287273		A_55_P2377645	Armcx4	2.57133	0.0104897		A_55_P2257381	E330011O21Rik	-2.0565	0.00128017
A_66_P111322	Tmem178b	-2.02788	0.0105448		A_55_P2412924	2210011G09Rik	-2.25771	0.0329538		A_55_P2376547	4930558K02Rik	2.79965	0.0130771		A_55_P2256423	2810019C22Rik	-2.00821	0.0437567
A_66_P111301	Mplkip	-3.69167	3.53846e-05		A_55_P2412214	D830015G02Rik	-2.62965	0.0247491		A_55_P2376423	Igkv4-72	-2.27673	0.00421756		A_55_P2255449		-2.7261	0.0232488
A_66_P111224		-2.69199	8.1079e-05		A_55_P2410626	A430061O12Rik	2.33069	0.0250079		A_55_P2376363	4930432F04Rik	2.17297	0.00180117		A_55_P2255399	F630048H11Rik	2.02598	0.0343913
A_66_P111090	Sctr	2.53044	0.0201005		A_55_P2410586	9330156P08Rik	3.33302	0.00541799		A_55_P2372528	4122401K19Rik	-5.64611	0.0324248		A_55_P2254779	AU020094	-2.13524	0.00371732
A_66_P111035	Epb4.1l5	-6.51301	0.0273786		A_55_P2408588	Arntl	-13.7944	0.00192754		A_55_P2372228	A430104N18Rik	4.09224	0.016885		A_55_P2251181	2900076A13Rik	2.06722	0.0171903
A_66_P111011	Gata3	2.18433	0.0374885		A_55_P2408415	Kcnq1ot1	3.61631	0.00572701		A_55_P2371281	9030601B04Rik	2.65679	0.0078553		A_55_P2249556	A630081D01Rik	3.74502	0.0125755
A_66_P110798	Rn45s	-2.32553	0.000416513		A_55_P2408355	BB166591	2.53364	0.0265878		A_55_P2368366	2010320M18Rik	-2.11092	0.000538145		A_55_P2248315	2310043M15Rik	6.55142	0.0027592
A_66_P110769	Cabyr	-4.07909	0.00250326		A_55_P2408175	4930412F09Rik	-2.12799	0.00378445		A_55_P2367461	Acer2	2.81569	0.0288353		A_55_P2245920	Lrrc8a	2.00932	0.00413799
A_66_P110746	Olfr1249	-2.10225	0.0142623		A_55_P2406852	Lix1	2.56983	9.77029e-05		A_55_P2367007	C330020G15Rik	-5.3656	0.0442594		A_55_P2245904	9530003O04Rik	-2.07519	0.00111942
A_66_P110742		5.79891	5.33219e-05		A_55_P2405436	2210408F21Rik	-2.04469	0.00186852		A_55_P2364703	9430037G07Rik	3.14169	0.0352069		A_55_P2243367	Ap1g1	-2.02644	0.00385984
A_66_P110715	Gm7244	-2.31425	9.23812e-05		A_55_P2404733	LOC552909	2.37112	0.0407451		A_55_P2363883	AI428898	-2.19337	0.0451985		A_55_P2241553	9330133O14Rik	2.0496	0.0398794
A_66_P110687	Taf1a	-2.10797	0.00018125		A_55_P2404479	4930435N07Rik	-2.15506	0.0070201		A_55_P2363587	9530004P13Rik	-2.64517	0.0356956		A_55_P2235059	6230415J03Rik	-2.1186	0.00388469
A_66_P110425	Kif6	-3.06656	0.019817		A_55_P2403620	Gm10389	3.1429	0.0212115		A_55_P2363040	1700007J24Rik	-3.21155	0.00147593		A_55_P2234979	3110027N22Rik	2.1041	0.0357237
A_66_P110343	Snx10	4.08602	0.000378182		A_55_P2402929	B430203I24Rik	2.25977	0.00319394		A_55_P2362601	D4Ertd681e	2.34403	0.037262		A_55_P2232410	AI195470	-2.66282	0.0112969
A_66_P110251	Tmem91	-2.50722	0.000402957		A_55_P2402756	A330049N07Rik	-2.02344	0.00473302		A_55_P2361437	Pitpnc1	-2.04891	0.0360818		A_55_P2232325		-4.07119	0.00350146
A_66_P110241	Wdr64	-2.42455	0.000124429		A_55_P2402134	9130020K20Rik	2.10781	0.0123251		A_55_P2358399	1700111N16Rik	-2.7543	0.0305476		A_55_P2228122	BC024137	-4.42529	0.0472508
A_66_P109996	Nlrp4g	-2.93357	0.00047662		A_55_P2399718		2.46957	0.0171086		A_55_P2357860	4933415E08Rik	-2.11332	0.00237706		A_55_P2226660	5033418A18Rik	2.47291	0.00331426
A_66_P109986	Cd33	5.0495	0.000201427		A_55_P2399688	Glipr2	3.17713	0.0119579		A_55_P2353853	4933402C06Rik	2.10674	0.00253013		A_55_P2221647	AI605517	5.80986	0.0115881
A_66_P109941	Mamdc4	2.05528	0.047987		A_55_P2398915	D2Ertd640e	3.04723	0.0111982		A_55_P2351193	Snora47	-7.95442	0.000195336		A_55_P2221365	4930421J07Rik	2.11601	0.0193436
A_66_P109802	Ces3b	-5.2759	0.000672161		A_55_P2397599	B930025B16Rik	2.4864	0.027587		A_55_P2349148	5830408B19Rik	-2.89669	0.000156149		A_55_P2219581	C76332	-2.3566	0.00867103
A_66_P109800	Gcsh	-2.46186	0.000127877		A_55_P2397504	D130046C19Rik	2.38255	0.00384893		A_55_P2347756	AU040972	3.58271	0.000115282		A_55_P2219059	Lmnb2	2.32927	0.0286359
A_66_P109681		41.6639	0.00100441		A_55_P2397400		2.69546	0.0298601		A_55_P2347384	D430040L24Rik	5.5225	0.0035856		A_55_P2216976	D13Ertd608e	6.56935	0.00532168
A_66_P109474	Rtn4ip1	-3.08203	0.000711419		A_55_P2395911	D2Ertd295e	3.06767	0.0134593		A_55_P2347073	AI662501	2.23371	0.00110777		A_55_P2214348	4930469K13Rik	4.87357	0.000690545
A_66_P109471	Olfr293	-2.58421	0.00115799		A_55_P2395371	1700015C15Rik	-2.79239	0.00748662		A_55_P2344598	E330037I15Rik	4.72525	0.000368464		A_55_P2209046	B830008H07Rik	-2.04414	0.00435663
A_66_P109460	Mtfr2	-2.89204	3.99786e-05		A_55_P2395111	4930429F11Rik	-2.41339	0.000739981		A_55_P2337074	Mid1	2.33088	0.0103759		A_55_P2208463	6820426E19Rik	-3.24938	0.000276892
A_66_P109243	Gm6416	-2.43678	0.000129134		A_55_P2395018	5830411N06Rik	-2.57157	0.0132473		A_55_P2337073	Mid1	4.27642	0.00590063		A_55_P2202539	BC028789	2.49869	0.0187949
A_66_P109080	Lrguk	-2.17861	0.0132667		A_55_P2393734	4933421H12Rik	2.39125	0.0364626		A_55_P2336173	Mirg	11.4576	0.00135481		A_55_P2201866	2310047N11Rik	-5.34635	0.000917166
A_66_P108979	Olfr1535	-2.70888	0.000600997		A_55_P2391065	Cep128	-5.42364	0.000763741		A_55_P2334942		2.80525	0.00100075		A_55_P2200029	Dleu2	-3.28927	0.0483253
A_66_P108965	Smpdl3b	3.12394	0.00271752		A_55_P2391000	4933430L12Rik	-2.85071	0.00533545		A_55_P2334629		-3.90468	0.0363206		A_55_P2199202	Il22	-4.1637	0.0353445
A_66_P108918	Olfr1129	-2.21242	0.00220832		A_55_P2390776	1810064F22Rik	-3.11305	0.000365496		A_55_P2334424	D630024D03Rik	-10.6937	0.00130009		A_55_P2199118	Bend4	2.47246	0.0188385
A_66_P108692		-2.52217	0.000248008		A_55_P2390348	5330411O13Rik	-2.10227	0.000332367		A_55_P2332926	2810037O22Rik	-3.20595	0.00943567		A_55_P2198983	4930415C11Rik	-4.61729	0.00346878
A_66_P108672	Mtg1	-2.49364	0.000413125		A_55_P2389900	Gpr64	2.75869	0.00164236		A_55_P2330545	Zfp81	-2.27384	0.00248665		A_55_P2197998	D4Ertd58e	-3.83177	0.006426
A_66_P108636	Defb4	-2.61878	0.00852361		A_55_P2389893		-3.57669	0.0148772		A_55_P2329180	Ccdc148	2.48227	0.000495086		A_55_P2193512	AI661384	3.36189	0.0405713
A_66_P108622	Gtpbp10	-2.44821	0.000148464		A_55_P2389818		-2.25034	0.00837001		A_55_P2328647	4930567K12Rik	-2.8736	0.00178474		A_55_P2188817	4921507G05Rik	-2.05689	0.0419552
A_66_P108609	LOC101055871	-2.47292	0.000102236		A_55_P2389308		-4.23428	0.0230785		A_55_P2326260	4930525G20Rik	-2.62979	0.00755332		A_55_P2187918	Cep55	50.5781	0.00209235
A_66_P108451		14.8969	5.0839e-05		A_55_P2388428	4631405K08Rik	-3.00861	0.0185007		A_55_P2326205	2810405F17Rik	2.61854	0.0205547		A_55_P2187909	4930560O18Rik	-3.05111	0.0130426
A_66_P108380	A330021E22Rik	11.7453	0.000519194		A_55_P2386256	D130062J10Rik	2.11475	0.00408969		A_55_P2325038	Acsm2	-12.7243	0.00203657		A_55_P2187076	Sncg	-2.58378	0.00416415
A_66_P108188	Car5a	-4.65415	0.000319162		A_55_P2386236	Ceacam2	-3.11397	0.000833079		A_55_P2324886	D930027P08Rik	3.2446	0.0114737		A_55_P2186978		5.0069	0.00453642
A_66_P108152	Cbr1	-2.05836	0.00889839		A_55_P2384009	C81489	5.86046	0.0274727		A_55_P2322555	5930433N17Rik	2.76802	0.00554333		A_55_P2186929		5.26944	0.021212
A_66_P108059	Ttc39c	-18.882	4.65298e-06		A_55_P2383902	8030453O22Rik	2.48143	0.0111348		A_55_P2322139	C530042K13Rik	-4.34018	0.0127568		A_55_P2186648	Bard1	2.45727	0.0138478
A_66_P107878	Gm2670	-2.95065	0.00975397		A_55_P2383283	2310001H17Rik	-2.49164	0.00596687		A_55_P2322064	F830005D05Rik	4.38096	0.00415101		A_55_P2186405	Phc1	-2.54863	0.0294726
A_66_P107745	1110020A21Rik	-4.02932	4.53206e-05		A_55_P2382105	BC035044	3.60556	0.0125086		A_55_P2320313	Kcnb1	2.04039	0.00647987		A_55_P2186080	Gm12680	4.62038	0.00144216
A_66_P107523	Gm6360	-2.441	0.0001315		A_55_P2380428	5430416G10Rik	-2.10211	0.0021424		A_55_P2320283	Hmga2-ps1	3.1456	0.000449564		A_55_P2185840	Nnmt	5.55484	0.000809774
A_66_P107437	Sfxn5	-3.62035	0.000553959		A_55_P2379480		2.76372	0.000633306		A_55_P2319035	AW011956	-2.45555	0.00533339		A_55_P2185826	Cyp3a13	3.45994	8.49923e-05
A_66_P107379	Mdk	2.40805	0.00292644		A_55_P2378129	D11Ertd80e	-2.13285	0.000972341		A_55_P2318934	1200007C13Rik	13.7294	0.0384257		A_55_P2185821	Cyp3a13	3.05354	0.000124241
A_66_P107129	3300005D01Rik	3.60564	0.000167798		A_55_P2376193		-2.20262	0.00280805		A_55_P2318584	Aqp8	-33.2298	0.00148908		A_55_P2185605	Cd48	5.34658	0.00213691
A_66_P106968		-3.03245	0.000183453		A_55_P2375121	AI225934	2.13499	0.0191772		A_55_P2317665	E2f1	-3.55687	0.000132761		A_55_P2185367		-5.68786	0.000230245
A_66_P106948	Gm9926	-3.72855	0.00176651		A_55_P2374337	A130071D04Rik	2.76384	0.021847		A_55_P2317570	1700051A21Rik	3.08062	0.00962088		A_55_P2185160		-2.16749	0.00437256
A_66_P106836	Kmo	-2.18314	0.00125383		A_55_P2372890		4.51183	0.0135422		A_55_P2316783	Grm5	-2.08865	0.0056018		A_55_P2184796	Pcdhb18	3.03277	0.0492576
A_66_P106789		4.68381	0.000219198		A_55_P2371301	4930413E15Rik	2.05464	0.00616837		A_55_P2315012	4930458D05Rik	6.46089	0.0144991		A_55_P2184601	Itgal	4.51897	3.09074e-05
A_66_P106760	Adam32	-3.57889	0.00227605		A_55_P2371281	9030601B04Rik	2.71702	0.0421162		A_55_P2308743	A430106A12Rik	2.59122	0.00049072		A_55_P2184459		4.29917	0.000469115
A_66_P106750	Magi2	3.20112	0.000320409		A_55_P2371242	C80171	-2.99284	0.00825452		A_55_P2304507	Noxa1	3.81264	0.00959831		A_55_P2184189	Ncf2	4.87337	0.00128635
A_66_P106744	Syce3	-6.20249	0.0393522		A_55_P2370210	1700025K04Rik	-2.64777	0.0059754		A_55_P2303972	D830044D21Rik	-7.27073	0.00234901		A_55_P2184123	Atp1a4	4.8653	0.0114828
A_66_P106661	Slc7a1	6.00661	0.00039183		A_55_P2364763	4930597L12Rik	-2.08624	0.00297923		A_55_P2303868	5033421B08Rik	-2.26658	0.00162004		A_55_P2183955	Olfr97	2.81723	0.0222202
A_66_P106585	Sae1	-2.46308	0.000165434		A_55_P2364241	Nhsl2	2.66694	0.0254307		A_55_P2303478		-2.39451	0.00125339		A_55_P2183692	Rgs19	3.48067	0.00189172
A_66_P106584	Pot1a	2.81619	0.00527451		A_55_P2364211	2810428J06Rik	2.08305	0.0217647		A_55_P2303310	C730036E19Rik	-15.9775	0.00054034		A_55_P2183438	Runx1	11.6753	0.00327162
A_66_P106583		-2.12519	3.97342e-05		A_55_P2363902	2610020P09Rik	2.11437	0.0223529		A_55_P2295786	Fam63b	-4.35856	0.00865204		A_55_P2183208	Prl2c1	-2.92964	0.0294275
A_66_P106536	2010107E04Rik	-2.06252	0.000287732		A_55_P2363040	1700007J24Rik	-2.21666	0.0117818		A_55_P2294692	2810030D12Rik	3.44924	0.0231286		A_55_P2183010	P2rx7	2.4617	0.0285747
A_66_P106497		-2.02117	0.0319215		A_55_P2362877	4930471E19Rik	-3.51384	0.0464431		A_55_P2293414	1700001C19Rik	-3.07015	9.29361e-06		A_55_P2182820	Arl14	-2.67783	0.0437268
A_66_P106421	Ccdc30	-7.62855	9.71855e-05		A_55_P2362601	D4Ertd681e	2.83493	0.0170366		A_55_P2293013	Ces2a	-16.8417	6.7791e-06		A_55_P2182795	Plcg1	-2.67272	0.00728524
A_66_P106388	Ms4a4c	2.90907	0.00539143		A_55_P2362391	E130112N10Rik	-2.25116	0.00496323		A_55_P2291776	4833447P13Rik	-2.448	0.00858081		A_55_P2182740	2310047D07Rik	3.7267	0.010737
A_66_P106385	Daf2	2.67037	0.0240463		A_55_P2362356		-2.38539	0.0151061		A_55_P2289819	Cd163	35.4716	0.0017348		A_55_P2182467	Slamf6	3.69004	0.0330351
A_66_P106334		-3.81249	0.00346602		A_55_P2361652	LOC101056045	2.40556	0.0172716		A_55_P2289800	Fryl	3.39345	0.0261325		A_55_P2182372		-4.47571	0.0108781
A_66_P106148	Raet1c	-3.63319	0.00424492		A_55_P2361437	Pitpnc1	2.05364	0.0089515		A_55_P2289040	AI429363	5.35947	0.00382702		A_55_P2182358	Arid3a	2.46176	0.0255328
A_66_P106090	Rpa3	-2.895	5.85843e-05		A_55_P2360501		3.72599	0.0076809		A_55_P2289035	B230308N11Rik	-2.45094	0.000676928		A_55_P2182273	Bin2	6.57728	0.00100876
A_66_P105784	Rag2	-2.67949	4.48896e-05		A_55_P2360356	4933401D09Rik	-2.46444	0.0333599		A_55_P2288825	Fcamr	2.01542	0.00678648		A_55_P2181963	Gm8369	8.85928	0.0176935
A_66_P105735		-2.26446	0.0444281		A_55_P2360271	9530056K15Rik	-2.06592	0.00335993		A_55_P2288645	LOC497255	4.0305	0.0146299		A_55_P2181753	Bdh1	-2.26903	8.67595e-05
A_66_P105270	Hao1	-4.03465	7.57937e-06		A_55_P2360251	4930597G03Rik	-2.30128	0.0131042		A_55_P2288232	Gucy1a2	-2.0461	0.00141292		A_55_P2181557	Nnmt	2.59325	0.000804351
A_66_P105234	Olfr1049	-2.49548	9.4017e-05		A_55_P2359110	A230005M16Rik	-2.93066	0.0142917		A_55_P2282361	1300015D01Rik	11.2893	0.0250956		A_55_P2181348		-2.57768	0.00808832
A_66_P105074	Enpp5	-3.58445	4.24174e-06		A_55_P2358027		-2.03665	0.0130508		A_55_P2281818	LOC433347	10.6381	0.00179369		A_55_P2180949	Lcp2	3.67217	0.00108543
A_66_P105046	Il18	-2.23949	7.95789e-05		A_55_P2357751	4930552N02Rik	-2.01092	0.0467036		A_55_P2281095	2610002M06Rik	-2.0737	0.000326501		A_55_P2180899	Aldh3a2	-3.96355	5.88602e-05
A_66_P105009	4930472D16Rik	-2.42693	0.000124884		A_55_P2357254	5330430P22Rik	-8.91713	0.00110849		A_55_P2280821	Dlc1	-2.94124	0.00144626		A_55_P2180866	Tbc1d21	-2.82747	0.0270162
A_66_P104945	Krt24	5.10237	0.000581872		A_55_P2356840	1600020E01Rik	2.57069	0.0170314		A_55_P2279957	5730414N17Rik	-2.80406	0.0051152		A_55_P2180861		4.18237	0.00443997
A_66_P104815	Ecm1	-3.10017	0.000203052		A_55_P2356263	Anks1b	-2.49405	0.0246352		A_55_P2279690	2900076A07Rik	3.65126	0.0189227		A_55_P2180769	Gls	3.11827	0.00626128
A_66_P104559	4932413F04Rik	2.22599	0.00508963		A_55_P2353194	AU042950	-2.03092	0.00299139		A_55_P2279685	2900076A07Rik	-2.24469	0.0205734		A_55_P2180531	Sik3	-2.08117	0.000738514
A_66_P104473	Polg2	-4.623	2.9803e-05		A_55_P2353181	C130030K03Rik	-2.28728	0.0223381		A_55_P2279140	F830014O18Rik	4.04295	0.0246597		A_55_P2180415	Cd72	2.64358	0.0165877
A_66_P104437	5730577I03Rik	-2.02252	0.0146665		A_55_P2351465	5830403M04Rik	-3.15103	0.0335179		A_55_P2278965	5430420F09Rik	3.03356	0.0438418		A_55_P2180216	Zfp940	6.00364	0.000198566
A_66_P104422	Ckap4	2.98839	0.013488		A_55_P2351024	E430024P14Rik	-3.59226	0.0112712		A_55_P2278775	9130016M20Rik	-2.11792	0.00163556		A_55_P2180056	1500004F05Rik	-3.7039	0.000614611
A_66_P104296	1700112E06Rik	7.7361	0.000828869		A_55_P2349752	8030494B02Rik	2.82545	0.0418144		A_55_P2277171	Gm10134	6.36719	0.00295675		A_55_P2179676	Spp2	-2.05041	0.000456929
A_66_P104180	2310015D24Rik	-3.21625	0.0124368		A_55_P2347906	B230303A05Rik	-2.47152	0.00227004		A_55_P2275109	9530034A14Rik	-2.01229	0.00737978		A_55_P2179599	Gbp8	5.00907	0.000375984
A_66_P103232		7.97601	0.0206003		A_55_P2347384	D430040L24Rik	3.24507	0.00597413		A_55_P2274378	AW549542	-8.79178	0.00574424		A_55_P2179572	Slc18a3	-2.4361	0.0150112
A_66_P103231		2.21248	0.00387494		A_55_P2347058		-2.05227	0.0025449		A_55_P2270137	B930036G03Rik	-2.34556	0.000342142		A_55_P2179309	A630033H20Rik	2.36837	0.0303151
A_66_P103229	Foxl1	-2.68232	4.37061e-05		A_55_P2346639	Sec14l3	-2.1122	0.00273068		A_55_P2269700	Ccdc163	-2.59684	0.014497		A_55_P2178801	Ugt1a10	-4.15369	0.028003
A_66_P103027	Clec9a	2.24751	0.0156344		A_55_P2345444	4933436I20Rik	-3.14748	0.0123692		A_55_P2269497	Pdp1	2.2628	0.0391307		A_55_P2178800	Ugt1a10	-3.65776	0.00363397
A_66_P103015		-2.47292	0.000100702		A_55_P2341110	Gm13704	-2.07643	0.00294825		A_55_P2266744	B930095M22Rik	-2.69397	0.00248498		A_55_P2178678	P2rx5	2.14494	0.0137572
A_66_P102722	Bsph1	9.92892	0.0009322		A_55_P2340758	4930554N03Rik	-2.10189	0.00289588		A_55_P2266679	Mettl21c	-3.07393	0.0457575		A_55_P2178388		-2.15839	0.00458581
A_66_P102374	Calb1	4.97597	0.00197549		A_55_P2339601	AW060742	-2.26063	0.0265709		A_55_P2263342	1700029M20Rik	-4.95014	0.00302155		A_55_P2178127	42979	3.33867	0.0256871
A_66_P102346		-2.82079	5.93864e-05		A_55_P2338598	Wdfy4	-2.01632	0.00261939		A_55_P2262753	9530053J19Rik	4.39258	0.0031459		A_55_P2177911	Lepr	6.31549	0.0409535
A_66_P102265	1700119I11Rik	-2.28335	0.0087079		A_55_P2337416	C030010L15Rik	-2.5123	0.00571462		A_55_P2262081	4930563F15Rik	3.82154	0.0120745		A_55_P2177659	Mast1	-2.12293	0.000636277
A_66_P102250	Gcsh	-3.18051	0.000806761		A_55_P2336173	Mirg	7.31527	0.0030368		A_55_P2261772	C230098O21Rik	2.89732	0.00754113		A_55_P2177658	Mast1	-2.51527	0.00625592
A_66_P102110		-5.5978	0.0135275		A_55_P2336078	4933404K13Rik	-4.10972	0.0466944		A_55_P2258832	5230400M03Rik	3.15014	0.00624065		A_55_P2177371	Gm3086	-2.65704	0.00604752
A_66_P102090	Pkmyt1	3.29217	0.00453339		A_55_P2335768	4831407H17Rik	-2.23115	0.00133903		A_55_P2258261	1810008I18Rik	-3.47113	0.000644365		A_55_P2177248	Ccdc162	-2.00993	0.0369247
A_66_P102076	Cep68	-2.25576	0.00103155		A_55_P2335185	4930500F04Rik	-2.62198	0.0125552		A_55_P2258159	E330032C10Rik	-2.32977	0.00863447		A_55_P2177013	Cldn23	-2.21794	0.00893194
A_66_P101942	Gm9706	2.91491	0.00098583		A_55_P2335120	A130033P14	-2.2161	0.00188991		A_55_P2255449		-3.82115	0.00112288		A_55_P2176753		2.31626	0.0489349
A_66_P101938	Lce1k	3.72393	0.0229488		A_55_P2334884		-2.15267	0.00173376		A_55_P2252601	4930481B07Rik	-2.54336	0.000404219		A_55_P2176535	Cyp2j5	-2.17581	0.0199898
A_66_P101879	Cyp2u1	-3.63478	0.000234509		A_55_P2334424	D630024D03Rik	-3.55801	0.00164556		A_55_P2252105	4921530L18Rik	2.57684	0.0129323		A_55_P2176530	1110057K04Rik	-2.05305	0.00242539
A_66_P101835	Cd38	2.32052	0.007146		A_55_P2334112	1700096K18Rik	-2.40147	0.00128668		A_55_P2251974	A930038B10Rik	-2.1941	0.0272121		A_55_P2176325	Prex1	2.19798	0.00421937
A_66_P101563	Krtap13	-2.83386	3.09262e-05		A_55_P2332401		-2.64964	0.00404436		A_55_P2248315	2310043M15Rik	4.39206	0.0106847		A_55_P2175545	Gys2	-2.08339	0.0158161
A_66_P101473	Fbxl3	-2.07477	4.24076e-05		A_55_P2330173	4930474G06Rik	2.22305	0.00535854		A_55_P2246700		-2.03123	0.0117202		A_55_P2175489	Sfxn5	-2.38165	0.00653463
A_66_P101407	Acat3	-2.76292	0.000649078		A_55_P2329313	C530014P21Rik	2.80537	0.00696019		A_55_P2245920	Lrrc8a	2.07573	2.51209e-05		A_55_P2175065		-3.7056	0.0112954
A_66_P101107	Brd7	2.11613	0.0061645		A_55_P2329298	Gm12758	-2.25791	0.0469801		A_55_P2244871		3.16692	0.0232311		A_55_P2175060	Ppapdc1b	2.56338	0.030122
A_66_P100853		4.33269	0.000113143		A_55_P2328920	Tle4	2.10431	0.0132096		A_55_P2234889		-2.48915	0.0156794		A_55_P2174524		4.47525	0.000405217
A_66_P100850	Gm2990	-2.62307	0.000161462		A_55_P2328092		2.73707	0.000865524		A_55_P2234164		2.47916	0.00229728		A_55_P2174490	Cd37	5.71928	0.00322147
A_66_P100840		-4.67812	1.46496e-07		A_55_P2328013	9630017O17	2.20549	0.00205421		A_55_P2233462	2700022O18Rik	2.17682	0.0432616		A_55_P2174401	Ccdc42b	-3.09107	0.00469147
A_66_P100820	D230030E09Rik	3.88895	0.0156068		A_55_P2327518	1500032P08Rik	3.16563	0.0188638		A_55_P2232754	Smarcal1	-2.60983	0.00108145		A_55_P2174067	Cerk	2.472	0.0195634
A_66_P100794	Magea5	-2.56052	8.87218e-05		A_55_P2326647	9530078M16Rik	-2.03665	0.00170339		A_55_P2232410	AI195470	-7.16212	0.000539971		A_55_P2173526	A230070E04Rik	-2.2985	0.000922851
A_66_P100586		2.22861	0.0257172		A_55_P2326205	2810405F17Rik	4.3536	0.00371115		A_55_P2232325		-3.17255	0.00069881		A_55_P2173438	Arhgap4	2.21148	0.0149651
A_66_P100419		-4.80998	0.00208808		A_55_P2322620		-2.28192	0.00959241		A_55_P2230913	Etv6	2.06106	0.00012317		A_55_P2173398		-6.16944	0.00100196
A_66_P100268		2.34288	0.00138036		A_55_P2322555	5930433N17Rik	4.30007	0.0010714		A_55_P2230484	5033403F01Rik	3.83412	0.00304405		A_55_P2173210	Gm16340	3.86797	0.015578
A_66_P100262	Olfr1471	-2.10921	0.00172543		A_55_P2322382	A930009E08Rik	3.11523	0.0182472		A_55_P2230154	A730046J19Rik	-2.95677	0.00333576		A_55_P2172956	Cnih2	-2.03926	0.023633
A_66_P100113		-2.3021	0.000108088		A_55_P2322064	F830005D05Rik	4.77187	0.00276112		A_55_P2229244	E430022K19Rik	4.97488	0.00976185		A_55_P2172852	Ptplad2	2.87452	1.03199e-05
A_66_P100029	Klra7	-5.48098	0.0014148		A_55_P2321889	4933404I11Rik	-2.03165	0.0030566		A_55_P2228122	BC024137	-10.416	0.000234672		A_55_P2172022	B4galt1	2.15024	0.00182881
A_65_P20799	Abi2	2.70714	0.0230123		A_55_P2321453	D11Ertd726e	2.11128	0.0141859		A_55_P2227321	Ptprd	-2.06078	0.000487582		A_55_P2172001	Mrgpra2a	5.69894	0.000723624
A_65_P20683	Gm1070	2.14465	0.0010729		A_55_P2321125	D230040A04Rik	3.45237	0.00152942		A_55_P2223282	B130019D13Rik	-2.08369	0.00597797		A_55_P2171658	Stx3	3.64054	0.000952811
A_65_P20641	Fads2	-2.70995	8.34399e-05		A_55_P2320840	B930053N02Rik	-3.32849	0.0376382		A_55_P2221647	AI605517	5.82858	0.0112137		A_55_P2171413	Me1	-3.68752	0.000622162
A_65_P20249	Prkcb	3.74502	0.000363921		A_55_P2320263	C030007I01Rik	3.08341	0.0154506		A_55_P2221365	4930421J07Rik	3.07072	0.00376373		A_55_P2171348	Grm2	-2.47842	0.0135015
A_65_P20167	Hyou1	5.28183	0.000370415		A_55_P2318955	4930417H01Rik	-2.14557	0.002963		A_55_P2221236	AU024180	-8.05691	0.00123243		A_55_P2171258	Gm13180	-2.24674	0.017068
A_65_P19832	Ttr	-2.316	0.00286267		A_55_P2318584	Aqp8	-3.05282	0.00715243		A_55_P2221165	Il22ra1	3.00518	0.016043		A_55_P2171116	Lgals3	5.54152	0.00170328
A_65_P19319	Soga1	2.25596	3.76623e-05		A_55_P2317570	1700051A21Rik	3.45107	0.00518101		A_55_P2220899	B230303O12Rik	-2.52267	0.0233323		A_55_P2170881	Arhgap26	-7.14199	0.00643242
A_65_P19138	42801	-2.19015	0.000119109		A_55_P2315762		-2.42286	0.000694037		A_55_P2219059	Lmnb2	2.14576	0.0108725		A_55_P2170834		-2.65749	0.0216914
A_65_P19089	Esrrg	-5.40811	0.00358093		A_55_P2314396		4.56763	0.034411		A_55_P2214348	4930469K13Rik	6.56259	5.9442e-06		A_55_P2170519	4933406I18Rik	-3.89813	0.0246014
A_65_P18948	Ppm1h	3.25014	0.000152909		A_55_P2314229	C920021A13	2.30691	0.0121698		A_55_P2210724	Trcg1	3.31778	0.0188628		A_55_P2170464		-3.42111	0.0383742
A_65_P18935	Grin1	3.34699	0.00139387		A_55_P2312654	BB070754	2.59628	0.0273867		A_55_P2210011	Mroh1	3.44054	0.0310053		A_55_P2170454	Gsta2	-33.2702	0.00285223
A_65_P17869	Rpf1	2.65781	0.0173825		A_55_P2308835	E130110O22Rik	-2.08972	0.000106489		A_55_P2209308	9530083O12Rik	3.14989	0.0406647		A_55_P2170439		-3.45292	0.00492783
A_65_P17602	Pgm5	-3.59937	0.00572057		A_55_P2308743	A430106A12Rik	3.22116	0.00146891		A_55_P2209298		2.65036	0.0371174		A_55_P2170345	Gm6729	-2.0574	0.00103032
A_65_P16750	Psma8	-4.02697	0.0199613		A_55_P2308239	Ccr9	-2.54337	0.0014888		A_55_P2209046	B830008H07Rik	-2.56872	0.00157694		A_55_P2170064	Catsperd	-2.87082	0.00312413
A_65_P16688	Taok2	2.31859	0.0032911		A_55_P2307603	R74862	-2.77701	0.00809787		A_55_P2207342	LOC101056197	-3.89805	0.00109961		A_55_P2170009	Lactb2	-2.46882	0.0065317
A_65_P16208	Baz1a	2.70106	0.00802597		A_55_P2307339	1700087I21Rik	-2.59729	0.00454347		A_55_P2207186	Slc30a7	-4.15022	0.00131487		A_55_P2169953		2.94577	0.0260493
A_65_P15689	Mut	-2.24988	0.000798125		A_55_P2305005	A430105J06Rik	-2.90891	0.034602		A_55_P2206254	LOC627096	-3.52615	0.0187448		A_55_P2169669	Csf1	2.44379	0.0128981
A_65_P15518	Arfgap1	3.10962	0.0304178		A_55_P2304010	AU015230	-3.87726	0.018791		A_55_P2204396	6030458E02Rik	2.29102	0.0359905		A_55_P2169586	Ccdc80	2.51311	0.00897419
A_65_P15245	Nrp2	4.7178	0.00158136		A_55_P2303972	D830044D21Rik	-2.22244	0.00171379		A_55_P2203284		2.72195	0.000550585		A_55_P2169559	Tnfrsf13b	-2.09311	0.0119056
A_65_P13713	Ank3	-2.51589	0.00118306		A_55_P2303868	5033421B08Rik	-2.48443	0.00299968		A_55_P2201866	2310047N11Rik	-5.83452	2.18069e-05		A_55_P2169415	Cgn	-2.05326	0.000351902
A_65_P13527	Osbpl8	-2.38541	0.000366406		A_55_P2302973	Kdm5d	-4.64502	0.0259854		A_55_P2200029	Dleu2	-2.56718	0.0383584		A_55_P2169356		2.9662	0.00140076
A_65_P13459	Cd300lb	4.0023	0.000586604		A_55_P2302195	0610040F04Rik	-2.05694	0.00622481		A_55_P2199202	Il22	-2.49691	0.0143067		A_55_P2169259	Cyp3a25	-2.44807	0.011214
A_65_P13209	Ctsd	-3.04923	5.04789e-05		A_55_P2301995	D930002L09Rik	-2.36132	0.000726184		A_55_P2198983	4930415C11Rik	-7.67052	0.0034412		A_55_P2169234	Pycr1	10.7382	0.00283211
A_65_P12955	Sec16a	2.70947	0.00815584		A_55_P2301941	A530030E21Rik	2.3878	0.0169535		A_55_P2197998	D4Ertd58e	-2.14828	0.0241111		A_55_P2169124	Slc22a30	-2.829	0.039234
A_65_P11504	Zfp85-rs1	-2.1675	0.00154734		A_55_P2301516	Pet100	-3.43764	0.041483		A_55_P2196185	4930412C18Rik	-2.85521	0.0113267		A_55_P2169104	Tenm4	-3.05724	0.043437
A_65_P11216		3.54139	0.00224646		A_55_P2301063	9930024M15Rik	2.13368	0.00794976		A_55_P2195202	1700016K05Rik	-3.74831	0.0242227		A_55_P2168990	Tmsb10	2.34747	0.0181875
A_65_P10491	Raph1	3.75647	0.000760375		A_55_P2299186	4930412L05Rik	2.11348	0.0109591		A_55_P2193809	9530062K07Rik	-2.55225	0.04064		A_55_P2168823		7.13923	0.000640414
A_65_P09778	Thada	-2.39149	0.00779272		A_55_P2298158	D8Ertd620e	-2.07231	0.00267382		A_55_P2192662	Lepr	18.519	0.00285939		A_55_P2168736	Relb	2.11756	0.000125008
A_65_P09285	2610524H06Rik	3.16237	0.0338767		A_55_P2295671	D9Ertd720e	2.03758	0.00079937		A_55_P2192577	H2bfm	-2.99641	0.0454842		A_55_P2168722	Fmo5	-3.70435	0.0120901
A_65_P09032	Rab43	-2.25543	0.000109984		A_55_P2294617		-2.04297	0.00224467		A_55_P2190299	Fggy	-2.60017	0.00207952		A_55_P2168643	Khk	-2.41101	0.000359304
A_65_P08971	F3	-4.58891	0.00665377		A_55_P2293013	Ces2a	-2.31997	0.0120951		A_55_P2188106	2510003B16Rik	-2.30172	0.00234478		A_55_P2168233	Gm1661	-2.02346	0.0383453
A_65_P08864	Dph5	2.47018	0.000439106		A_55_P2293007	AI662175	-2.07545	0.00228499		A_55_P2187918	Cep55	58.8748	0.0017689		A_55_P2167728	Gm10451	2.06799	0.00207838
A_65_P08507	Adam23	2.5849	0.00271471		A_55_P2292881	Gm20757	-2.05477	0.00328868		A_55_P2187909	4930560O18Rik	-3.12906	0.0145231		A_55_P2167092	Cdk15	-2.66104	0.000228132
A_65_P07450	Brd8	4.84719	0.0218553		A_55_P2292737	2310002F09Rik	-2.27047	0.0325197		A_55_P2187076	Sncg	-3.34256	0.00152646		A_55_P2166501	Cd44	4.99279	0.00077092
A_65_P07038	Ddx20	-2.09972	0.00949518		A_55_P2292435	Slc8a1	-2.36601	0.00287035		A_55_P2187053	Tpm1	-2.19322	0.0213236		A_55_P2166069	2310079G19Rik	-2.51151	0.000613853
A_65_P06872	Fam210a	-2.5566	0.000320031		A_55_P2291796	2810403G07Rik	-2.52506	0.0359578		A_55_P2187034		-2.51958	0.000158448		A_55_P2166024	Vmn1r63	-2.47195	0.0126208
A_65_P06446	Tfrc	2.05057	0.0193253		A_55_P2291776	4833447P13Rik	-2.00891	0.0127912		A_55_P2186961		-7.12954	3.22903e-06		A_55_P2165979	Olfr9	-2.09856	0.0380963
A_65_P06147	Fgfr3	-2.40993	0.00298052		A_55_P2289800	Fryl	-2.01097	0.034511		A_55_P2186808	Gm12620	2.17794	0.0035102		A_55_P2165869	Cebpb	2.04337	0.00864829
A_65_P05456	Naa11	-2.94491	0.0156549		A_55_P2289707	Cacnb4	-5.16084	0.0066286		A_55_P2186584	Shmt1	-2.69486	0.00183253		A_55_P2165234	2300005B03Rik	-2.31963	0.000261267
A_65_P05252	Cdc25a	2.25895	0.000766238		A_55_P2288825	Fcamr	-2.45757	0.000993031		A_55_P2186558	Tmem242	-2.21382	0.00807092		A_55_P2165199	Cxcr6	3.26522	0.00902496
A_65_P04847	Vgll3	-2.64591	0.00167768		A_55_P2288690	1700066J03Rik	-2.93231	0.0176756		A_55_P2186395		-2.2855	0.0387676		A_55_P2165091	Acnat2	3.95459	0.00791849
A_65_P04827	Cwc25	3.2005	0.015782		A_55_P2288047	Igkv6-15	-2.5946	0.00225547		A_55_P2186302	Gm9866	-7.15295	0.00153045		A_55_P2164714	C7	-2.04838	0.0158508
A_65_P03874	Nav2	2.56529	0.00561348		A_55_P2287760	0610038L08Rik	-2.08038	0.00269509		A_55_P2186080	Gm12680	7.17053	5.59183e-05		A_55_P2164609	Gm960	-2.83217	0.00241893
A_65_P03442	Pgk1	-2.38055	2.59367e-07		A_55_P2287260	Snap23	2.32929	0.0139374		A_55_P2186038		-3.37624	0.00487535		A_55_P2164428	Cd27	2.96088	0.0411936
A_65_P03022	Cdc14b	-3.76916	1.89558e-05		A_55_P2286176	C030009O12Rik	-2.04809	0.00464106		A_55_P2186005	Sphk1	2.59035	0.0303301		A_55_P2164075	Gm10804	-5.35905	0.0256687
A_65_P02958	Rnf13	-2.26858	8.87328e-05		A_55_P2283551	2810455B08Rik	2.62455	0.0355559		A_55_P2185910	Mbtps2	2.09069	0.00400906		A_55_P2163873	Uox	-2.93595	0.002301
A_65_P02323	Sec22b	3.46454	0.000915221		A_55_P2282904		-5.54167	1.6341e-05		A_55_P2185905	Nrg4	20.5948	8.9365e-05		A_55_P2163774	Crip1	3.16179	0.0138552
A_65_P02321	Usp36	2.1887	0.00023471		A_55_P2281818	LOC433347	-2.2875	0.0152202		A_55_P2185900	Nrg4	29.8245	0.000261325		A_55_P2163263		5.6592	0.000156684
A_65_P02177	Gstm4	-8.35737	0.00108533		A_55_P2280511	4930553P18Rik	-2.32217	0.0126862		A_55_P2185840	Nnmt	8.39629	5.45223e-05		A_55_P2163098	Akr1c18	-2.96603	0.00563389
A_55_P2472435	Gbp3	2.48586	0.00495734		A_55_P2279997	4930549C15Rik	2.42805	0.0256193		A_55_P2185826	Cyp3a13	2.27002	0.0114349		A_55_P2163090	Gm10220	-2.26064	0.0312992
A_55_P2471752	Pcdhac2	-2.5386	0.000143657		A_55_P2279762	6330415B21Rik	2.76972	0.026642		A_55_P2185821	Cyp3a13	2.66748	0.00137059		A_55_P2162970		-4.12302	0.0105904
A_55_P2465382		3.50636	0.00500808		A_55_P2279250	D8Ertd503e	-2.20822	0.000252619		A_55_P2185605	Cd48	3.11893	0.00192916		A_55_P2162880	Cyp3a57	-2.4707	0.0205692
A_55_P2461067	Guf1	-2.72765	0.000519293		A_55_P2279140	F830014O18Rik	4.08513	0.0228345		A_55_P2185367		-5.32716	0.000507225		A_55_P2162870	Cnksr2	-3.30298	0.00839798
A_55_P2459006	Agphd1	-2.43878	0.000248266		A_55_P2279035	9030419F21Rik	3.23181	0.00443473		A_55_P2185330	Gm10914	3.62952	0.0301299		A_55_P2162472		-3.02006	0.00113938
A_55_P2452259	Gls	2.13286	0.000592793		A_55_P2278845	3830408C21Rik	-2.74254	0.0383559		A_55_P2184601	Itgal	4.26206	0.00198734		A_55_P2162394	Pdp1	2.54481	0.0149262
A_55_P2449750	1700047I17Rik2	2.93543	0.000576288		A_55_P2278727	Gm2085	-2.91663	0.0199811		A_55_P2184459		5.50352	0.000721143		A_55_P2162002	Pkhd1	-2.55473	0.00100697
A_55_P2448776	Mdn1	2.79225	0.0441063		A_55_P2278531	C920008N22Rik	2.20078	0.0253117		A_55_P2184440	Hint1	7.2562	0.000640469		A_55_P2161923	Rabgap1	-2.06379	0.00350244
A_55_P2438722	Ifnar1	2.20875	0.0167588		A_55_P2277171	Gm10134	2.61672	0.0192503		A_55_P2184314		2.86065	0.0428108		A_55_P2161865	Pdlim7	-2.2694	0.0164923
A_55_P2437253	Nae1	-2.6708	5.57934e-05		A_55_P2277014	AA522020	3.07052	0.0124308		A_55_P2184189	Ncf2	6.3029	0.00165941		A_55_P2161824	Arr3	2.3155	0.0357
A_55_P2435613	Xpo7	2.35755	0.00123186		A_55_P2275402	9330177L23Rik	2.38494	0.00616682		A_55_P2184028		-2.19482	0.00800896		A_55_P2161640	Slc38a1	2.50035	0.036762
A_55_P2431862	Srpk2	-2.17319	0.000100837		A_55_P2274508	4933416E03Rik	-2.42592	0.00074029		A_55_P2183955	Olfr97	3.9488	0.00309088		A_55_P2161465	Gm10516	-2.03879	0.0395109
A_55_P2431118	Itsn1	2.17257	0.00243793		A_55_P2273959	G930009F23Rik	-2.18358	0.0028164		A_55_P2183940	Olfr47	4.50792	0.00858638		A_55_P2161423	Hif3a	2.53006	0.005714
A_55_P2429714	Timmdc1	-2.09112	0.000291999		A_55_P2272748		-2.06747	0.00556123		A_55_P2183692	Rgs19	3.16243	0.00909867		A_55_P2161410	Serpina3m	2.0019	0.00773587
A_55_P2428514	Retn	-3.09659	0.0482568		A_55_P2271416	1700022F17Rik	-2.02709	0.00149379		A_55_P2183438	Runx1	20.6986	0.0036006		A_55_P2161347	Acmsd	-2.02727	0.0160002
A_55_P2426941	Gprin3	-2.85731	0.000185644		A_55_P2270740		2.06958	0.0121852		A_55_P2183433	Rab30	11.0909	0.000181601		A_55_P2161055	Trp63	3.82903	0.00462218
A_55_P2426799	D530017H19Rik	3.21307	0.00337246		A_55_P2269988	5930438M14Rik	-2.60379	0.0020618		A_55_P2183338	Marveld3	7.63637	0.000101552		A_55_P2160686	Tsc22d1	-3.93048	0.000132875
A_55_P2425442	D030036P13Rik	-3.53981	0.0270383		A_55_P2269819	Fam107a	-2.16963	0.0383835		A_55_P2183172	Rdx	-2.17786	0.00486651		A_55_P2160243		-2.32989	0.0487778
A_55_P2425437	D030036P13Rik	2.13093	0.00108009		A_55_P2269254	5730419F03Rik	2.1585	0.00384982		A_55_P2183010	P2rx7	2.00824	0.0422823		A_55_P2159934	Rnf186	-4.79959	0.0439197
A_55_P2425190	Nhsl2	2.56767	0.0127966		A_55_P2267240	4930471G03Rik	-2.06014	0.0215908		A_55_P2182795	Plcg1	-2.35172	0.0167794		A_55_P2159830	Yaf2	-2.17269	0.000103824
A_55_P2424767	Hecw1	-3.3895	0.00207553		A_55_P2266285	6330522J23Rik	2.51782	0.00487686		A_55_P2182770	LOC101056551	-2.38922	0.0472431		A_55_P2159717	Gm5591	-2.94726	0.0166059
A_55_P2423616	2900057C01Rik	4.69922	0.00187423		A_55_P2266178	AI790276	2.09046	0.010783		A_55_P2182740	2310047D07Rik	2.72407	0.016361		A_55_P2159565	Tas2r131	-2.63794	0.000981788
A_55_P2423586	Eya1	-3.5576	0.00151119		A_55_P2266013	Gm13032	5.65429	0.00150804		A_55_P2182736	Limd2	-2.00205	0.0108745		A_55_P2159555	Adamts4	2.98931	0.0191306
A_55_P2422961	C130021H21Rik	3.36525	0.0450756		A_55_P2263728	AU045094	-2.31146	0.000386079		A_55_P2182452	Tnfsf15	-2.13397	0.019842		A_55_P2159264	Lifr	-3.83476	0.0257715
A_55_P2422650	5031425E22Rik	-6.76198	8.56391e-05		A_55_P2263337	4930459I23Rik	-2.08349	0.00330447		A_55_P2182358	Arid3a	5.28244	0.000888419		A_55_P2158990	Jun	3.36508	0.0494544
A_55_P2422438		-4.79463	0.00862073		A_55_P2263098	A130078K24Rik	2.62814	0.00125575		A_55_P2182273	Bin2	6.58243	0.00118472		A_55_P2158592	Sirpb1a	12.0981	0.00098253
A_55_P2422164	C130093G08Rik	2.74672	0.0116288		A_55_P2263053	Hal	-3.4027	0.0103253		A_55_P2181753	Bdh1	-3.64817	0.000310738		A_55_P2158522	Pbx1	-3.17034	0.00043506
A_55_P2421597	Tnc	-5.29598	0.000189312		A_55_P2262753	9530053J19Rik	2.70966	0.0128138		A_55_P2181752	Apol7a	-3.17877	0.02481		A_55_P2157814	Gmds	2.21461	0.0255177
A_55_P2420983	6330575P09Rik	3.74449	0.0244522		A_55_P2262743	Gm671	-2.11779	0.000441866		A_55_P2181557	Nnmt	2.61604	0.000670938		A_55_P2157307		2.60884	0.00252898
A_55_P2420928	2900016J10Rik	2.53316	0.0216401		A_55_P2262560	5730471H19Rik	2.19679	0.00149629		A_55_P2181348		-2.31913	0.00384185		A_55_P2157225	Nqo2	-3.062	0.00747383
A_55_P2420694		-8.95536	0.00698923		A_55_P2262272	4930443O20Rik	-2.89356	0.0191317		A_55_P2181009	Gpr180	-2.49737	0.0123873		A_55_P2157205	Cdx1	-2.7446	0.00542318
A_55_P2420591	2010001M06Rik	-3.38647	0.0183217		A_55_P2261882	D230040J21Rik	2.13949	0.0127593		A_55_P2180949	Lcp2	2.41644	0.00405348		A_55_P2157023	Sox17	2.46158	0.0208834
A_55_P2418824	4930527F14Rik	3.86596	0.000151971		A_55_P2259500	D130012P04Rik	2.05735	0.00659115		A_55_P2180899	Aldh3a2	-4.11826	0.00185498		A_55_P2157008	Ear10	4.39604	0.00213182
A_55_P2418745	D230034L24Rik	3.32082	0.011247		A_55_P2259120	D7Ertd143e	-2.10694	0.00227965		A_55_P2180866	Tbc1d21	-2.24363	0.0157206		A_55_P2156978		-2.28277	0.0156681
A_55_P2418581	4930539C22Rik	-3.10342	0.00115014		A_55_P2258832	5230400M03Rik	3.3763	0.00480427		A_55_P2180861		10.5838	0.00031703		A_55_P2156930	Sytl3	2.58796	0.00210188
A_55_P2418111	C76472	-2.35132	0.000173424		A_55_P2256943	C230030N03Rik	-2.12515	0.00400857		A_55_P2180459		-2.20544	0.00253001		A_55_P2156464	Nt5c3l	2.1357	0.0167749
A_55_P2417379	4930434F21Rik	-2.71797	3.98486e-05		A_55_P2256586	4930573O21Rik	3.80854	0.00767242		A_55_P2180425	Uqcc	-2.05838	0.000296964		A_55_P2156304	Kcnj16	3.36916	0.00397884
A_55_P2417224	AI447881	3.3142	0.0126282		A_55_P2256506	AU045717	-2.58991	0.0343866		A_55_P2180216	Zfp940	6.47052	2.21064e-05		A_55_P2156186	BC028528	2.32583	0.00496202
A_55_P2416097	A130082J08Rik	3.1508	0.0359984		A_55_P2256423	2810019C22Rik	-2.13363	0.0293276		A_55_P2180091	Lrrc28	2.87711	0.000191467		A_55_P2155931	BC096441	2.60926	0.0004022
A_55_P2415701	4930518P08Rik	-2.84863	0.0295995		A_55_P2256388	4930467D21Rik	-2.04908	0.0032831		A_55_P2180056	1500004F05Rik	-3.60904	0.000983594		A_55_P2155504	Lck	12.1087	0.000919404
A_55_P2415387	Lrriq4	-5.69243	0.00224867		A_55_P2255628	9430013L14Rik	2.62556	0.00579169		A_55_P2179974	Spsb1	-2.36266	0.0121604		A_55_P2155347	Grk4	3.27183	0.00681105
A_55_P2415029		2.91151	0.00213642		A_55_P2255399	F630048H11Rik	3.69253	0.00452328		A_55_P2179964	Prickle4	-2.94172	0.00967162		A_55_P2155312	Dock3	-2.75158	0.00063382
A_55_P2414909	4933411B09Rik	2.04717	0.00162896		A_55_P2253607	E030013I19Rik	-2.07642	0.00276057		A_55_P2179676	Spp2	-2.35385	0.00232289		A_55_P2155197	Tnfrsf22	2.13274	0.0218703
A_55_P2413964	1700048M11Rik	2.75922	0.0228038		A_55_P2253289		2.99336	0.0374561		A_55_P2179599	Gbp8	2.70064	0.0427226		A_55_P2155146	Klrc3	3.27095	0.0422266
A_55_P2413069	4933427I22Rik	-2.29273	0.000111173		A_55_P2251999	Mpp2	-2.59086	0.0233817		A_55_P2179572	Slc18a3	-3.08374	0.00647389		A_55_P2154982	Cd8b1	12.6235	0.00373455
A_55_P2412859	5830468K08Rik	2.1311	0.0253219		A_55_P2251181	2900076A13Rik	3.08417	0.00976131		A_55_P2179296	Mad2l1	-3.03972	0.000473307		A_55_P2154977	Rpap3	5.35238	0.000567645
A_55_P2412349	AW111846	-3.20461	0.000783019		A_55_P2250424	9530029O12Rik	2.70956	0.00364427		A_55_P2179271	Ccdc30	-7.24453	0.0187512		A_55_P2154782		-2.06407	0.00733322
A_55_P2412319	A830052D11Rik	-3.19897	0.000893783		A_55_P2249897		2.64232	0.00359323		A_55_P2178971		-2.78049	0.0313673		A_55_P2154425	Cd320	-2.16866	0.0495641
A_55_P2410626	A430061O12Rik	2.56611	0.0366432		A_55_P2249556	A630081D01Rik	3.20205	0.0383099		A_55_P2178800	Ugt1a10	-9.71135	1.9642e-05		A_55_P2154200	Olfr612	-7.43396	0.00169308
A_55_P2410586	9330156P08Rik	2.72164	0.0180121		A_55_P2248315	2310043M15Rik	2.86974	0.0288648		A_55_P2178653		4.89845	0.000285126		A_55_P2153620	Ahnak	-2.0644	0.000697591
A_55_P2410151		2.11987	0.00617185		A_55_P2247010	4930511E03Rik	-4.29325	0.0160264		A_55_P2178388		-2.78839	0.00290541		A_55_P2153191		-2.50166	0.0304526
A_55_P2408415	Kcnq1ot1	6.28624	0.00149306		A_55_P2246147	D7Ertd495e	-3.45658	0.0062285		A_55_P2178287	LOC100046147	-2.54596	0.0269871		A_55_P2152607	Cyp4a12b	-4.39306	0.0152729
A_55_P2408355	BB166591	3.64921	0.0298645		A_55_P2244677	6720422M22Rik	2.57612	0.0159581		A_55_P2178064	LOC101056486	2.10762	0.00076108		A_55_P2152248	Cpe	2.31639	0.048008
A_55_P2408175	4930412F09Rik	-2.42344	0.00230164		A_55_P2243998	Dcst1	2.52372	0.0363644		A_55_P2178036	Serpina6	-353.643	5.22102e-05		A_55_P2152225	Ihh	-3.80517	0.00565736
A_55_P2407344	Fam92a	2.62851	0.00995267		A_55_P2243676	1700057H21Rik	-3.79604	0.0246056		A_55_P2177911	Lepr	22.2641	0.00265655		A_55_P2151986	Gngt2	2.55153	0.000935474
A_55_P2406977	Olfr643	-2.56428	9.65118e-05		A_55_P2242690	D2Ertd127e	2.0575	0.00940686		A_55_P2177899	Dact1	-3.98751	0.00668159		A_55_P2151956		-6.4512	0.0251257
A_55_P2406852	Lix1	3.48938	0.00546341		A_55_P2240688		4.06345	0.00750342		A_55_P2177658	Mast1	-2.62895	0.00284586		A_55_P2151685	Pira11	3.48344	0.00206217
A_55_P2406802	4930511J24Rik	-2.34878	0.0001052		A_55_P2240523	D930049A15Rik	-3.66803	0.0262139		A_55_P2177371	Gm3086	-3.43666	0.00796502		A_55_P2151609	Sorl1	5.74848	0.0011788
A_55_P2406506	Tuba-rs1	2.99321	0.000104772		A_55_P2239499	Tmevpg1	-2.25631	0.00117066		A_55_P2176731	Prdx6	-2.36853	0.00337367		A_55_P2151556	C8g	-2.54003	0.00742748
A_55_P2405784	BC023202	-2.4289	0.000142545		A_55_P2238406	6330407A03Rik	3.14486	0.0301946		A_55_P2176729	Prdx6	-2.0987	0.00670561		A_55_P2151428	Fut9	2.13099	0.0397182
A_55_P2405353	C430002E04Rik	-3.01732	5.17055e-05		A_55_P2237440		-2.23285	0.00121413		A_55_P2176535	Cyp2j5	-2.8778	0.000426173		A_55_P2151121	Sgcz	-2.07196	0.0240418
A_55_P2404808	2210406H18Rik	8.90618	0.000790186		A_55_P2237360	1700008O03Rik	-2.09732	0.00300295		A_55_P2175400	Zfp467	-2.0691	0.0333031		A_55_P2150876	Als2cr12	-4.46608	0.0219746
A_55_P2404733	LOC552909	3.05988	0.00605761		A_55_P2237129	St6galnac5	-2.21879	0.000880223		A_55_P2175296		-2.78141	0.0359819		A_55_P2150603		-4.16744	0.0157497
A_55_P2404484	1700001L05Rik	-3.8298	0.000604631		A_55_P2236823	6430590A07Rik	3.38096	0.0108189		A_55_P2175065		-6.73326	0.00104523		A_55_P2150476		-2.54932	0.0176189
A_55_P2403620	Gm10389	3.43795	0.0137401		A_55_P2235895	A630072L19Rik	3.59403	0.00295557		A_55_P2175060	Ppapdc1b	3.53242	0.00257004		A_55_P2149896	Fam211a	17.4354	0.000411388
A_55_P2403453	BC037032	-2.43646	0.000250721		A_55_P2235426	1700069L16Rik	-2.10814	0.0024763		A_55_P2174935	Mn1	-2.03803	0.000667827		A_55_P2149654	Dtx3	4.18027	0.000263428
A_55_P2402929	B430203I24Rik	3.411	0.000631379		A_55_P2233462	2700022O18Rik	2.58352	0.0256889		A_55_P2174524		3.80447	0.0367275		A_55_P2149363	6430548M08Rik	3.12529	0.00120215
A_55_P2402781	B230216N24Rik	2.24083	0.0111289		A_55_P2232325		-2.14354	0.0113052		A_55_P2174490	Cd37	7.2176	0.00257008		A_55_P2149288	Cmya5	-2.13105	0.0132777
A_55_P2402756	A330049N07Rik	-2.49413	0.000368862		A_55_P2231750	4921513H07Rik	-3.54457	0.0206476		A_55_P2174401	Ccdc42b	-2.65834	0.00405807		A_55_P2148873	Cat	-2.00013	0.00404189
A_55_P2402527		-2.02823	0.00985353		A_55_P2231747		2.5521	0.0291555		A_55_P2174067	Cerk	3.71955	0.0068654		A_55_P2148519	5830403L16Rik	-2.33401	0.0175066
A_55_P2402312		-2.76693	0.000470807		A_55_P2231342	A030010E16Rik	-2.27162	0.00371395		A_55_P2173982	Rrm2	-2.4394	0.0424972		A_55_P2148071	LOC101056526	-13.1562	0.021026
A_55_P2402134	9130020K20Rik	2.21267	0.0120228		A_55_P2230968	D930050J11	3.35158	0.0197328		A_55_P2173892	Isg20	2.203	0.0313049		A_55_P2147831	Gimap4	2.84896	0.00522792
A_55_P2401646	Trdn	-2.41819	0.000359961		A_55_P2229239	9430014F16Rik	2.18236	0.00106532		A_55_P2173832	Gpr125	-2.27128	0.00652258		A_55_P2147803	Madcam1	2.96746	0.00369757
A_55_P2401403	C030046G05	2.15876	0.00404861		A_55_P2228122	BC024137	-2.70848	0.00169023		A_55_P2173526	A230070E04Rik	-2.11383	0.0340488		A_55_P2147791	Fam129c	2.26451	0.00765535
A_55_P2399718		2.7635	0.007965		A_55_P2226660	5033418A18Rik	2.45455	0.0372417		A_55_P2173452		2.22791	0.00237779		A_55_P2147736	Dpysl4	-2.71332	0.0055344
A_55_P2399688	Glipr2	4.82334	0.000535374		A_55_P2222557	1600022D10Rik	-2.91517	0.00860146		A_55_P2173398		-7.29422	0.000926534		A_55_P2147712	Ctla4	2.93657	0.0169069
A_55_P2398788	Rnf112	7.42854	0.0103153		A_55_P2221901		-2.2336	0.00273841		A_55_P2173333	Plcb4	2.60126	0.00178137		A_55_P2147487	Cyth3	7.77893	0.000541553
A_55_P2397854		2.19555	0.0377656		A_55_P2221647	AI605517	5.71756	0.0215657		A_55_P2173210	Gm16340	4.44013	0.006739		A_55_P2147315	Olfr1441	-7.21405	0.000560343
A_55_P2397599	B930025B16Rik	2.94262	0.00500084		A_55_P2221365	4930421J07Rik	3.27047	0.0104878		A_55_P2172852	Ptplad2	3.49531	0.00258921		A_55_P2147250	Caprin2	-2.18324	3.36538e-05
A_55_P2397504	D130046C19Rik	2.76215	0.0100687		A_55_P2221236	AU024180	-3.151	0.0236966		A_55_P2172832	Kcne1l	-2.11664	0.0215743		A_55_P2147220	Ak2	-2.03189	0.0273399
A_55_P2397400		3.36388	0.000424427		A_55_P2220683	4833419A21Rik	-2.25878	0.00354834		A_55_P2172375		-2.14403	0.00018524		A_55_P2146848	Olfr681	-2.189	0.0101851
A_55_P2395911	D2Ertd295e	4.74486	0.00486479		A_55_P2220342	C230094B09Rik	2.17508	0.0384646		A_55_P2172001	Mrgpra2a	9.54207	0.000581632		A_55_P2146495	Gm10554	-2.33423	0.0342915
A_55_P2395371	1700015C15Rik	-3.47675	0.0026076		A_55_P2219731	AI413759	-7.32014	0.000282456		A_55_P2171658	Stx3	5.63444	0.000116616		A_55_P2146254	Ifitm1	3.01213	0.000265625
A_55_P2395111	4930429F11Rik	-2.61168	0.00397307		A_55_P2219581	C76332	-2.80842	0.00984664		A_55_P2171413	Me1	-2.38159	0.00646712		A_55_P2146177	Cerk	2.37976	0.00167718
A_55_P2395018	5830411N06Rik	-2.72406	0.020842		A_55_P2217598	D10Ertd755e	-2.08978	0.00943232		A_55_P2171406	Tm7sf2	-3.59555	0.00142002		A_55_P2145977	Fbxw15	2.90917	0.0363935
A_55_P2393734	4933421H12Rik	3.49122	0.0072519		A_55_P2217553	1700085C21Rik	-2.08872	0.00311859		A_55_P2171378	Pdzk1ip1	-3.0749	0.0147161		A_55_P2145913	Gm9975	-2.85925	7.6907e-05
A_55_P2393483	6430584L05Rik	-2.06622	0.00396803		A_55_P2215142	4930515I15	-2.32804	0.0136389		A_55_P2171348	Grm2	-2.73368	0.00380454		A_55_P2145833	Dmpk	3.39438	0.000688425
A_55_P2391065	Cep128	-3.96594	5.17768e-05		A_55_P2214348	4930469K13Rik	7.90547	0.000482277		A_55_P2171303	Bin3	2.00029	0.0200105		A_55_P2145617	Krt80	-2.82387	0.0090222
A_55_P2390776	1810064F22Rik	-2.64954	0.00142292		A_55_P2213828	4933412E12Rik	2.2111	0.0105534		A_55_P2171116	Lgals3	5.9055	0.00186218		A_55_P2145262	Pex5l	-2.14246	0.0251225
A_55_P2390348	5330411O13Rik	-2.88129	3.35503e-05		A_55_P2212259	4930539J05Rik	-2.44448	0.0183225		A_55_P2170881	Arhgap26	-11.2868	0.00112282		A_55_P2145224		2.61712	0.0349642
A_55_P2389900	Gpr64	4.14018	0.00285433		A_55_P2210724	Trcg1	4.26596	0.0135153		A_55_P2170876	Tcp10b	3.00067	0.00222237		A_55_P2144716	Hecw2	2.22562	0.0429414
A_55_P2389818		-2.09869	0.00674641		A_55_P2210213	4732423E21Rik	2.27063	0.018842		A_55_P2170834		-2.47853	0.0287978		A_55_P2144651		2.08485	0.00515179
A_55_P2389518	5430437J10Rik	2.57015	0.000955051		A_55_P2209308	9530083O12Rik	-2.82646	0.0186865		A_55_P2170737	Igf2bp2	2.22947	0.0373258		A_55_P2144526	Fam65b	3.63977	0.00521164
A_55_P2389308		-4.99292	0.00609801		A_55_P2209298		3.43829	0.00316118		A_55_P2170681	Cdca8	-3.88544	0.0430035		A_55_P2144512		-2.24008	0.00238369
A_55_P2387915	Gm10804	-7.57376	0.00156479		A_55_P2209053	2900001G08Rik	-2.22362	0.00520741		A_55_P2170519	4933406I18Rik	-7.2525	0.000471454		A_55_P2144386	Emr1	3.21593	0.00869618
A_55_P2386256	D130062J10Rik	2.58621	0.00173326		A_55_P2208836	4930432N10Rik	-2.2469	0.00217349		A_55_P2170515		2.48237	0.0237918		A_55_P2144372	Mmp24	-2.81626	0.0222853
A_55_P2386236	Ceacam2	-2.00738	0.00156909		A_55_P2208443	9330109K16Rik	-2.56675	0.00388269		A_55_P2170464		-3.97334	0.00350033		A_55_P2144126		2.35085	0.027383
A_55_P2384671		-2.10289	0.0381312		A_55_P2208260	D230019N24Rik	2.17459	0.0398209		A_55_P2170454	Gsta2	-38.5627	0.0078002		A_55_P2144090		-2.1398	0.0442693
A_55_P2384521	Ankrd33b	-3.27257	0.00278257		A_55_P2207220	Gm10065	3.98384	0.0037272		A_55_P2170439		-3.75771	0.0362941		A_55_P2143976	Kcnd1	-2.3483	0.0242584
A_55_P2384009	C81489	11.6718	0.000184755		A_55_P2205638	D17H6S56E-5	2.31755	0.0124508		A_55_P2170394	Gm2518	2.2895	0.000316913		A_55_P2143923	Slc13a2	-5.11168	0.00913022
A_55_P2383902	8030453O22Rik	2.5288	0.017221		A_55_P2204804	Dclk1	2.72691	0.00919043		A_55_P2170009	Lactb2	-2.58159	0.0236817		A_55_P2143765	Ugt1a6b	-2.03506	0.00383521
A_55_P2383897		2.35537	0.0248806		A_55_P2204491		-2.98405	0.0150777		A_55_P2169963	Gm13152	-2.755	0.00751131		A_55_P2143436		-3.69038	0.0488972
A_55_P2383877	2810040C05Rik	3.14629	0.022118		A_55_P2204396	6030458E02Rik	12.7199	0.000434652		A_55_P2169953		4.00499	0.00350326		A_55_P2143279	Nkd2	2.10826	0.00530329
A_55_P2383283	2310001H17Rik	-3.72197	0.000972921		A_55_P2204227	B530045E10Rik	-3.89784	0.0186104		A_55_P2169669	Csf1	2.11095	0.029544		A_55_P2143251	Rims3	4.4126	0.00389835
A_55_P2383248	4930422N03Rik	3.1464	0.00323237		A_55_P2202539	BC028789	2.67218	0.00602165		A_55_P2169457	Mfsd4	-2.20267	0.027163		A_55_P2143070	Ass1	-2.2345	0.0327991
A_55_P2382741	AI314604	-3.40441	0.00168376		A_55_P2201866	2310047N11Rik	-6.36233	0.000321765		A_55_P2169259	Cyp3a25	-2.98458	0.0167922		A_55_P2143042	Gm8096	2.25887	0.0093249
A_55_P2382105	BC035044	14.9004	2.07728e-05		A_55_P2201733	4930571K23Rik	-8.71519	0.00449066		A_55_P2169234	Pycr1	19.1988	0.000585605		A_55_P2143041	Phgdh	6.57151	0.00587867
A_55_P2381926	Jam2	2.26634	0.00159962		A_55_P2201454	2310079F09Rik	2.99085	0.0106535		A_55_P2169124	Slc22a30	-9.43589	0.000964577		A_55_P2142858	Parp9	4.19162	0.0155093
A_55_P2381821	6430706H07Rik	4.26135	0.024239		A_55_P2201426	Gm11381	-2.58954	0.00615374		A_55_P2169104	Tenm4	-2.60642	0.028403		A_55_P2142724		-3.53456	0.011838
A_55_P2380806	Gm2115	-2.5286	0.02536		A_55_P2200618	LOC552902	2.61404	0.0185215		A_55_P2168736	Relb	3.25977	0.0173		A_55_P2142662		11.9661	0.000219799
A_55_P2380428	5430416G10Rik	-2.59953	6.20514e-05		A_55_P2200319		-2.89089	0.0291816		A_55_P2168722	Fmo5	-7.1242	1.0287e-05		A_55_P2142650		-2.15523	0.00821124
A_55_P2379624	BC037438	2.05732	0.0118464		A_55_P2199457	B230378P21Rik	-2.20264	0.00102071		A_55_P2168663	Atp5k	-2.00412	0.00152999		A_55_P2142430	Bank1	2.22269	0.0370895
A_55_P2379480		2.60858	0.0419452		A_55_P2199202	Il22	-2.13848	0.0215282		A_55_P2168643	Khk	-3.33287	8.1246e-05		A_55_P2142425	Gm19333	4.02683	0.00852346
A_55_P2378827	LOC553096	2.0615	0.0263837		A_55_P2199178	C030010L15Rik	-2.36857	0.000888259		A_55_P2168588	Cdk9	2.25351	0.00226065		A_55_P2142232	Serpina3i	31.4457	0.0190326
A_55_P2378707	4930509J09Rik	-3.00515	0.0012764		A_55_P2199118	Bend4	2.15409	0.0467943		A_55_P2168301	Slc46a1	-2.0445	0.000580896		A_55_P2142226	Serpina3f	5.90153	0.0107214
A_55_P2377645	Armcx4	2.01766	0.0494987		A_55_P2198648	5830420C07Rik	4.73314	0.00637883		A_55_P2168233	Gm1661	-2.12595	0.0105282		A_55_P2142028	Clip4	-3.05224	0.0365854
A_55_P2377261		-2.34989	0.00150106		A_55_P2197914	Srgap1	2.35253	0.0210788		A_55_P2167840	Gm14151	-2.11324	0.0484687		A_55_P2141826		-2.52618	0.000504755
A_55_P2376547	4930558K02Rik	2.33956	0.023457		A_55_P2196922	Kcnq1ot1	2.4714	0.0178725		A_55_P2167776		3.14315	0.00400236		A_55_P2141105	Ighv5-12	3.01849	0.000365622
A_55_P2376363	4930432F04Rik	2.0462	0.0292192		A_55_P2195859	E130218I03Rik	-2.62955	0.0238951		A_55_P2167728	Gm10451	2.03619	0.0018593		A_55_P2141068	Mcu	-2.07075	0.0299845
A_55_P2375121	AI225934	2.95902	0.00700307		A_55_P2195202	1700016K05Rik	-3.43089	0.00144042		A_55_P2167630	6330416G13Rik	3.48471	0.0030928		A_55_P2141058	Gm4477	-3.47463	0.0495271
A_55_P2374337	A130071D04Rik	4.047	0.00217679		A_55_P2195187	4933424G05Rik	-2.78634	0.0374002		A_55_P2167294	Gm4466	3.26602	0.0146664		A_55_P2140751		3.38189	0.00143364
A_55_P2374162	4930542N06Rik	-2.84012	7.66045e-05		A_55_P2195157	Dbn1	2.04825	0.013224		A_55_P2167092	Cdk15	-3.12074	0.000649803		A_55_P2140449	B3galt4	2.12558	0.015015
A_55_P2373872		-2.00517	0.0375086		A_55_P2195077	1700066D14Rik	-3.25522	0.00348212		A_55_P2166501	Cd44	6.6527	0.00141152		A_55_P2140390		-2.1227	0.0470124
A_55_P2373515		2.12844	0.0401292		A_55_P2194054	C030014A21Rik	-2.37951	0.00758039		A_55_P2166069	2310079G19Rik	-4.05944	0.00392175		A_55_P2140171		-2.21466	0.00214586
A_55_P2372890		3.97622	0.0289007		A_55_P2193419	4731420N21	2.60244	0.00197501		A_55_P2165869	Cebpb	2.00428	0.00988316		A_55_P2140042	Krt31	-2.64434	0.00322556
A_55_P2372228	A430104N18Rik	7.39432	0.00494362		A_55_P2193301		-3.65339	0.0371738		A_55_P2165839	Cebpe	-3.6271	0.0144292		A_55_P2140002	Tnfaip8	2.99903	0.00171001
A_55_P2371281	9030601B04Rik	3.22924	0.00916718		A_55_P2192662	Lepr	4.76312	0.00642006		A_55_P2165299	Mybpc1	2.8651	0.00736032		A_55_P2139703	Krtap5-4	-3.23013	0.0181972
A_55_P2371242	C80171	-2.83217	0.016161		A_55_P2192397	A330023F24Rik	2.20168	0.0357532		A_55_P2165234	2300005B03Rik	-2.05824	0.00175772		A_55_P2139587		-2.3654	0.044672
A_55_P2370419	AA409749	-2.44448	0.00303133		A_55_P2190212	AU044157	-2.02708	0.00280536		A_55_P2165091	Acnat2	7.74714	3.60292e-05		A_55_P2139546	B3gnt3	2.62738	0.0233795
A_55_P2370210	1700025K04Rik	-5.78588	0.000882961		A_55_P2189893	A630073K07Rik	2.45366	0.0140262		A_55_P2164909	D10Jhu81e	-2.43752	0.0144065		A_55_P2139236	A730020M07Rik	-2.96354	5.5303e-05
A_55_P2368625	Sp4	-2.58502	0.000410838		A_55_P2189461	9030425P06Rik	2.46026	0.0447423		A_55_P2164609	Gm960	-3.91233	0.00223778		A_55_P2139089	Slc22a28	-3.97419	0.00416858
A_55_P2368580	4930418C01Rik	-2.4431	0.000123799		A_55_P2187260		-2.2212	0.000584522		A_55_P2164534	Dtl	-3.02143	0.045885		A_55_P2139087	Slc22a28	-6.62585	0.00624266
A_55_P2368435	4930442G15Rik	-3.07191	0.00476586		A_55_P2187235		-2.39928	0.00065943		A_55_P2164408	Asb16	-3.94178	0.00371553		A_55_P2139014	Lcn6	-2.47755	0.0485034
A_55_P2365958	Helt	-2.31089	0.000177602		A_55_P2187211		-2.3012	0.000967346		A_55_P2163873	Uox	-4.25843	0.000558478		A_55_P2138718	Gm14483	-2.0846	0.0258303
A_55_P2364763	4930597L12Rik	-2.62014	9.02548e-05		A_55_P2187141	Pdcd1lg2	-2.21004	0.00533316		A_55_P2163263		5.9265	6.01409e-05		A_55_P2138591	Cyb5rl	-2.40846	0.0015011
A_55_P2364241	Nhsl2	3.1949	0.0100542		A_55_P2187053	Tpm1	-2.15419	0.0169434		A_55_P2163128	0610042G04Rik	2.28444	0.000340647		A_55_P2138306		2.80276	0.00206885
A_55_P2362635	Slc9a3	-2.45877	0.00415544		A_55_P2186942		-2.08479	0.00228571		A_55_P2162970		-8.16013	0.000208403		A_55_P2137611	Irgm2	2.49514	0.0107707
A_55_P2362601	D4Ertd681e	4.30769	0.00415182		A_55_P2186584	Shmt1	-2.14003	0.00582264		A_55_P2162965	Ptms	-2.34747	0.00238582		A_55_P2137521	Nmral1	2.00352	0.00185413
A_55_P2362391	E130112N10Rik	-2.3309	0.00917004		A_55_P2186302	Gm9866	-2.91251	0.0022438		A_55_P2162880	Cyp3a57	-3.24627	0.015303		A_55_P2137049	AA467197	6.26134	0.000216187
A_55_P2362356		-2.70871	0.0115034		A_55_P2186122		2.05919	0.023056		A_55_P2162870	Cnksr2	-3.05183	0.00439842		A_55_P2136976	Gm11213	-2.23078	0.00342121
A_55_P2362096	4921516I12Rik	-2.23015	0.00707665		A_55_P2186105		-2.12482	0.00308888		A_55_P2162472		-2.99798	0.00241178		A_55_P2136970		2.97639	0.00132169
A_55_P2361652	LOC101056045	3.1371	0.005348		A_55_P2186080	Gm12680	10.6204	0.00226723		A_55_P2162394	Pdp1	3.34662	0.0201342		A_55_P2136832	Gm6981	-2.0295	0.0055212
A_55_P2361647	4831440E17Rik	-2.19954	0.00255921		A_55_P2186051		-2.28835	0.000918013		A_55_P2162175	Ccdc149	2.8773	0.0423576		A_55_P2136776	Sult1b1	-2.90806	0.00381982
A_55_P2360501		5.43922	0.00148991		A_55_P2186005	Sphk1	2.32468	0.0165754		A_55_P2162002	Pkhd1	-2.5108	0.0387522		A_55_P2136410		-2.11923	0.00142324
A_55_P2360356	4933401D09Rik	-3.00696	0.0159975		A_55_P2185905	Nrg4	3.92101	0.024791		A_55_P2161858	Pdlim7	2.47673	0.0428108		A_55_P2136318	Slc1a5	4.20595	0.00942981
A_55_P2360251	4930597G03Rik	-2.32956	0.0127018		A_55_P2185900	Nrg4	6.35832	0.0175123		A_55_P2161824	Arr3	2.30823	0.0476135		A_55_P2135986	Ms4a4c	22.7628	0.00124512
A_55_P2359094	4933426B08Rik	-2.53163	9.70814e-05		A_55_P2185890	Cfh	2.04317	0.0142696		A_55_P2161640	Slc38a1	2.99028	0.0142385		A_55_P2135725	C8g	-2.31852	0.00229903
A_55_P2358216	A930006I01Rik	-2.60613	6.50465e-05		A_55_P2185786		-2.24981	0.00210136		A_55_P2161585	Coq10a	-2.19894	6.81814e-05		A_55_P2135720	Olfr1348	-2.60964	0.0194803
A_55_P2358027		-2.91251	1.84511e-05		A_55_P2185667		2.63135	0.0448403		A_55_P2161465	Gm10516	-2.24533	0.00010264		A_55_P2135521		2.06334	0.0277324
A_55_P2357751	4930552N02Rik	-2.94232	1.91497e-05		A_55_P2185536		2.02574	0.0131986		A_55_P2161423	Hif3a	2.66319	0.0114306		A_55_P2135331	Evl	3.56383	0.00169817
A_55_P2357254	5330430P22Rik	-5.72268	0.00182973		A_55_P2185410	Gm5258	-3.60293	0.0250667		A_55_P2161410	Serpina3m	2.83305	0.00171068		A_55_P2135311	Nol3	3.56962	0.000160694
A_55_P2356840	1600020E01Rik	2.54048	0.0410192		A_55_P2185407	Gm5258	-2.44262	0.0126676		A_55_P2161219	Thsd7a	2.24542	0.021437		A_55_P2135203		-9.04779	0.000658765
A_55_P2354531	2610029K11Rik	-2.40347	0.00061285		A_55_P2185367		-3.85849	0.00206597		A_55_P2161055	Trp63	9.23682	1.89084e-05		A_55_P2135095	Lce1c	-3.13063	0.00595086
A_55_P2354336		3.3127	0.0141811		A_55_P2185347		3.35097	0.0374098		A_55_P2160716	Arf5	-2.13978	0.00231493		A_55_P2135039	Hyi	-2.24085	0.0213695
A_55_P2353853	4933402C06Rik	3.87266	0.000151435		A_55_P2185330	Gm10914	-2.40104	0.0148134		A_55_P2160686	Tsc22d1	-3.4362	0.00580565		A_55_P2134616	Med12l	3.7436	0.0183526
A_55_P2353194	AU042950	-2.49631	0.000101042		A_55_P2185198	Asic4	-2.0387	0.00314051		A_55_P2160588		-2.67718	0.000527402		A_55_P2134387	Olfr544	-2.07917	0.00449071
A_55_P2353181	C130030K03Rik	-2.75344	0.00966729		A_55_P2185185	Tmem28	-2.49553	0.0164509		A_55_P2159934	Rnf186	-16.0696	5.35902e-05		A_55_P2134261		-2.62414	0.00655197
A_55_P2351465	5830403M04Rik	-3.97929	0.0163238		A_55_P2184897	Lbr	3.15736	0.0114769		A_55_P2159860	Zfp58	-2.02196	0.00544171		A_55_P2134022	Cftr	-2.31747	0.0336285
A_55_P2349752	8030494B02Rik	3.48433	0.0241031		A_55_P2184601	Itgal	3.03367	0.0116613		A_55_P2159830	Yaf2	-2.19867	0.000136235		A_55_P2133767	Usp36	-2.86622	0.0314714
A_55_P2348948	4933413C19Rik	3.08898	0.0206126		A_55_P2184440	Hint1	4.61197	0.000564024		A_55_P2159801	Rfc4	-2.06743	0.0027868		A_55_P2133637	Etfa	-2.06656	0.00931882
A_55_P2347756	AU040972	3.68559	5.48191e-05		A_55_P2184334	AA386476	3.25671	0.00938709		A_55_P2159717	Gm5591	-4.43015	0.0253808		A_55_P2133624		-3.37511	0.000814632
A_55_P2347384	D430040L24Rik	6.93511	0.000657826		A_55_P2184314		-2.88164	0.0181552		A_55_P2159585	Pm20d1	-2.50088	7.67958e-06		A_55_P2133315	Steap2	2.07745	0.0120079
A_55_P2347058		-2.53074	8.02352e-05		A_55_P2184197	Yy2	2.89243	8.02277e-05		A_55_P2159565	Tas2r131	-2.70766	0.0160088		A_55_P2133248	Gm8995	4.30824	0.00304156
A_55_P2345853	3830612M24	4.77362	0.0154925		A_55_P2184123	Atp1a4	4.18592	0.0386089		A_55_P2159555	Adamts4	6.58942	0.0106857		A_55_P2133225	Mmgt2	3.7847	2.09637e-05
A_55_P2345626	Gm15328	-2.60579	0.00195448		A_55_P2183692	Rgs19	2.76498	0.0467601		A_55_P2159485		10.2849	0.00188873		A_55_P2133125	D930015E06Rik	-3.29753	0.0001102
A_55_P2345593	E130101E03Rik	-2.67956	0.000174933		A_55_P2183668	Vwa3b	-2.70525	0.00471316		A_55_P2159264	Lifr	-12.1344	0.00030678		A_55_P2132800	Zfp367	-2.19199	0.00909592
A_55_P2345444	4933436I20Rik	-3.06856	0.0346306		A_55_P2183438	Runx1	8.06198	0.0317895		A_55_P2158663	Cldn7	-3.28876	0.019958		A_55_P2132549	Cd48	6.65449	0.000967772
A_55_P2345425	Sat2	-2.47053	0.000781582		A_55_P2183433	Rab30	2.41913	0.0304264		A_55_P2158592	Sirpb1a	13.6032	0.000501121		A_55_P2132512	Ngef	-2.15131	0.0103306
A_55_P2345284	LOC545785	-2.72118	0.00237364		A_55_P2182886		-2.10202	0.0169587		A_55_P2158547	Cyp2c54	-8.4699	0.000937002		A_55_P2132114		-2.03132	0.0174951
A_55_P2345116	1700109K24Rik	2.22429	0.0123992		A_55_P2182820	Arl14	-6.57486	0.00836224		A_55_P2158522	Pbx1	-2.79759	0.00129423		A_55_P2131483	Hmgb1	-2.36062	0.0424226
A_55_P2344933	C230076A16Rik	2.1128	0.0125793		A_55_P2182437		3.76923	0.0179284		A_55_P2158498	Btk	2.88795	0.00485215		A_55_P2131481		-2.01305	0.0462539
A_55_P2344873	E330037G11Rik	2.90975	0.0089708		A_55_P2182222	Rab3c	2.29275	0.00353452		A_55_P2158102	Camp	2.27374	0.026247		A_55_P2131238	Ttc39a	4.16196	0.0029185
A_55_P2344244	4930556H04Rik	-4.26336	0.0133136		A_55_P2181928	Slc45a3	-2.70385	0.0419657		A_55_P2157922	Ndufaf1	-2.08247	0.00032479		A_55_P2130885	Mas1	-2.41962	0.0101135
A_55_P2342444	D330022K07Rik	-2.32056	0.000155625		A_55_P2181796	Efna3	-2.1618	0.00630474		A_55_P2157829	Ccl1	-2.11024	0.00505636		A_55_P2130627	2210404O07Rik	2.93522	0.0016836
A_55_P2341890		3.45835	0.0310674		A_55_P2181181		5.70132	0.00271225		A_55_P2157814	Gmds	3.15294	0.0452856		A_55_P2130388	Mical1	2.60032	0.00250716
A_55_P2341110	Gm13704	-2.5562	9.69693e-05		A_55_P2181134	Olfr1157	-2.22615	0.00618927		A_55_P2157799	Myo7b	2.10737	0.0100882		A_55_P2129614	Itprip	3.52957	0.0137646
A_55_P2340678	AI849538	2.7556	0.00613868		A_55_P2180916		-3.28918	0.00283529		A_55_P2157586		-2.35655	0.00440494		A_55_P2129498	Gm5712	2.42452	0.0402429
A_55_P2340448	B230114P17Rik	-3.15623	0.0194		A_55_P2180769	Gls	5.47794	0.0160137		A_55_P2157307		2.16292	0.00854578		A_55_P2129469	LOC101056661	3.94287	0.000101477
A_55_P2339601	AW060742	-2.98913	0.00357388		A_55_P2180744	Clstn3	-2.59182	0.0158528		A_55_P2157225	Nqo2	-5.61843	4.57108e-05		A_55_P2129373	Capn11	-2.1817	0.0405568
A_55_P2338776	A930027P06Rik	-2.54198	8.1913e-05		A_55_P2180551	Fam60a	2.98572	0.0312641		A_55_P2157008	Ear10	9.13423	0.00135725		A_55_P2129354	Pilra	2.26026	0.00887412
A_55_P2338598	Wdfy4	-2.49249	0.000109504		A_55_P2180249	Mtch2	-2.70123	0.00280665		A_55_P2156731	H2-Eb1	-2.79878	0.000756035		A_55_P2129348	Pilra	3.50717	0.00172721
A_55_P2337074	Mid1	10.8228	0.000525297		A_55_P2180216	Zfp940	4.07054	0.0115644		A_55_P2156464	Nt5c3l	2.65552	0.00511786		A_55_P2129047	Tlr7	3.38945	0.00517643
A_55_P2337073	Mid1	8.49172	0.001773		A_55_P2179577	Nmur1	-2.02572	0.00333323		A_55_P2156462	Nt5c3l	2.07605	0.00423314		A_55_P2128929	Cc2d2a	-2.39604	0.00906135
A_55_P2336173	Mirg	16.4267	3.18033e-07		A_55_P2179271	Ccdc30	-2.89786	0.00716277		A_55_P2156435		-2.34558	0.000642276		A_55_P2128853	Ear12	5.96021	0.00959162
A_55_P2335768	4831407H17Rik	-2.80635	5.60503e-05		A_55_P2179074	Ciita	-2.74472	0.0306449		A_55_P2156425	Upk1a	-3.01285	0.000561806		A_55_P2128511	Ociad2	-3.16375	0.0033308
A_55_P2335185	4930500F04Rik	-3.33745	0.00374792		A_55_P2178583		2.18247	0.0384316		A_55_P2156304	Kcnj16	4.38998	0.00363584		A_55_P2128492	Rap1a	-2.24862	0.0074753
A_55_P2334884		-2.67696	5.95164e-05		A_55_P2178299		-2.45741	0.0314259		A_55_P2156186	BC028528	2.3833	0.0329566		A_55_P2128456		2.23014	0.0418966
A_55_P2334424	D630024D03Rik	-10.3092	1.07164e-06		A_55_P2178287	LOC100046147	-4.95145	0.00165395		A_55_P2156016	Recql4	-2.45287	0.0211641		A_55_P2128270	Phf21a	2.72809	0.000148411
A_55_P2334112	1700096K18Rik	-2.40192	0.00487798		A_55_P2178148		-2.61245	0.000665863		A_55_P2156006	Kcnk15	-2.31569	0.0107341		A_55_P2128203		3.40775	0.0384128
A_55_P2333797	4930474H20Rik	-10.7381	0.0190795		A_55_P2177911	Lepr	3.62579	0.0106004		A_55_P2155931	BC096441	2.91821	0.00377615		A_55_P2128113	Tbc1d12	-2.09275	0.00454705
A_55_P2332926	2810037O22Rik	-2.17694	0.00108032		A_55_P2177810	Tmem69	-2.17314	0.011898		A_55_P2155362		4.63781	0.0188285		A_55_P2127971	Gm9112	-3.5676	0.00750164
A_55_P2332194	Gm15998	2.44789	0.0274621		A_55_P2177659	Mast1	-2.3318	0.0416595		A_55_P2155347	Grk4	2.40849	0.00849829		A_55_P2127702	Racgap1	2.44233	0.017072
A_55_P2331546	D830026I12Rik	-4.2531	0.0197824		A_55_P2177658	Mast1	-2.31886	0.0479852		A_55_P2155312	Dock3	-4.25912	0.00100632		A_55_P2127672	Acsbg1	2.03564	0.0488468
A_55_P2331332		-2.78036	3.43565e-05		A_55_P2177578	Atp6v0a1	3.16765	0.00171321		A_55_P2155016	Ssbp1	-2.45733	0.00368192		A_55_P2127179		9.38504	0.00188119
A_55_P2330173	4930474G06Rik	2.15098	0.0150678		A_55_P2177410	Gm2814	-2.17879	0.00103491		A_55_P2154977	Rpap3	5.5067	3.30073e-05		A_55_P2126940		2.24659	0.0234271
A_55_P2329973	Gm13399	-2.07963	0.0388607		A_55_P2177248	Ccdc162	-3.09647	0.00116512		A_55_P2154787	Ppp1cb	-2.54084	0.000845942		A_55_P2126775	Gfpt1	2.52204	0.0146346
A_55_P2329923	Camkk2	2.01879	0.00322482		A_55_P2177243	Evc2	-3.17827	0.047238		A_55_P2154719		-2.88194	0.0205084		A_55_P2126572	Tmem25	-2.234	0.0185895
A_55_P2329313	C530014P21Rik	3.04267	0.00370487		A_55_P2177098	Npsr1	-2.28718	0.00120294		A_55_P2154709	Pter	-2.49001	0.000509001		A_55_P2126444	1810032O08Rik	3.1598	0.00592751
A_55_P2328092		3.42216	0.00211086		A_55_P2176968		-3.22313	0.0192148		A_55_P2154536	Hagh	-2.41373	0.00209306		A_55_P2126391	Srl	-4.71301	0.00211988
A_55_P2327958	Mtx3	-2.47737	0.000681197		A_55_P2176748	Prss50	-2.91958	0.0275269		A_55_P2154387	Bmp4	-2.04885	0.0417522		A_55_P2126333	Cyp2a12	-2.36684	7.07767e-05
A_55_P2327518	1500032P08Rik	3.9099	0.0195401		A_55_P2176631		-2.35175	0.00068513		A_55_P2154132	Tuba1b	-2.15162	0.00735694		A_55_P2126207	1600014K23Rik	4.19052	0.000985078
A_55_P2327027	Ano6	2.44967	0.00131984		A_55_P2176623		-2.04286	0.00326756		A_55_P2154107	Gcm1	-2.30126	0.0261717		A_55_P2125907	Gm21064	-2.72267	0.0267111
A_55_P2326507	A630057N01Rik	3.35301	0.0147814		A_55_P2176535	Cyp2j5	-2.24906	0.00146877		A_55_P2153797	Slc38a6	2.20059	0.00430835		A_55_P2125633	Acbd5	-2.08776	0.00646213
A_55_P2326260	4930525G20Rik	-3.10338	0.00403287		A_55_P2176530	1110057K04Rik	-2.3082	0.00123299		A_55_P2153740		-3.1522	0.000324322		A_55_P2125311	Rab3b	3.72784	0.00870507
A_55_P2326205	2810405F17Rik	3.80507	0.0215125		A_55_P2176470	Olfr1352	-2.50345	0.0130275		A_55_P2153459	Cecr2	-2.1713	0.0240521		A_55_P2125229	Arhgef2	2.99375	0.000304191
A_55_P2325698	2010002M09Rik	-2.56066	0.0134169		A_55_P2175925		-2.06375	0.000830754		A_55_P2153191		-5.39123	0.0133253		A_55_P2125208	Arid5a	5.15607	0.00651661
A_55_P2325568	1700060J05Rik	2.81531	0.000655813		A_55_P2175892		-2.07561	0.00309144		A_55_P2153122	Zap70	-2.59741	0.049382		A_55_P2125059	Faah	2.03823	0.0175119
A_55_P2324976	5033406O09Rik	-2.11025	0.00031703		A_55_P2175502	D6Mm5e	-2.34618	0.000392924		A_55_P2152872	Fgfrl1	-2.04953	0.00933101		A_55_P2124871	Npw	4.2793	0.00121395
A_55_P2324886	D930027P08Rik	5.22755	1.34965e-05		A_55_P2175405	Zfp467	-2.12019	0.0130185		A_55_P2152607	Cyp4a12b	-8.77798	0.049624		A_55_P2124712	Ces2c	-42.1956	0.00109194
A_55_P2322719	4930556L07Rik	2.89019	6.43155e-05		A_55_P2175400	Zfp467	-2.23579	0.00637937		A_55_P2152592	Agpat3	2.07331	0.000916932		A_55_P2124641	Gxylt2	-2.46884	0.0275018
A_55_P2322620		-2.85942	0.0424109		A_55_P2175304		-3.41578	0.0262204		A_55_P2152427	Zwilch	-2.7604	0.000328285		A_55_P2124523		-2.63155	0.00196614
A_55_P2322555	5930433N17Rik	5.75343	6.65946e-05		A_55_P2175296		-6.53616	0.00247544		A_55_P2152248	Cpe	3.16381	0.00156444		A_55_P2124273	Myo1f	7.69318	0.000392595
A_55_P2322382	A930009E08Rik	2.59635	0.0318017		A_55_P2175007	Thcytx	2.51745	0.00799254		A_55_P2152225	Ihh	-27.7797	4.97256e-05		A_55_P2123982	Rhoh	-2.3409	0.00449638
A_55_P2322064	F830005D05Rik	6.29392	0.000146682		A_55_P2174935	Mn1	-2.17605	0.00108666		A_55_P2152074	Ctps2	2.38749	0.00731815		A_55_P2123381	Fga	3.02698	0.0036303
A_55_P2321125	D230040A04Rik	4.80835	9.45532e-06		A_55_P2174861	Olfr766	-2.03796	0.00325315		A_55_P2152035	Tcf19	-2.14878	0.00169601		A_55_P2123062	Cbfa2t3	-3.04533	0.0198713
A_55_P2320313	Kcnb1	-2.66096	0.0142471		A_55_P2174761	Olfr514	-3.57315	0.0368656		A_55_P2151986	Gngt2	2.66137	0.00875138		A_55_P2122987	Dlx3	-2.38581	0.0150026
A_55_P2320283	Hmga2-ps1	2.46298	0.00273279		A_55_P2174646	Smr3a	-2.06198	0.00339923		A_55_P2151956		-2.03442	0.0364397		A_55_P2122464		-4.23179	0.0096851
A_55_P2320263	C030007I01Rik	4.02006	0.0026936		A_55_P2174611		-2.30823	0.000926576		A_55_P2151685	Pira11	5.08998	0.0026029		A_55_P2121491	Bbs9	2.70257	0.00892836
A_55_P2320085	4833415N18Rik	-2.36318	0.0096194		A_55_P2174187	Olfr1297	-2.19325	0.00165686		A_55_P2151609	Sorl1	5.03825	0.00244668		A_55_P2121408	Tpm2	-2.9365	0.00373141
A_55_P2319468	9430076C15Rik	2.47198	0.000322574		A_55_P2173897	Pla2g2d	-2.1591	0.000556815		A_55_P2151591	Pde3b	-2.76235	0.00451694		A_55_P2121392	Acaca	-2.51622	0.0259917
A_55_P2319035	AW011956	-3.2668	0.000562569		A_55_P2173664	Gm626	-2.62293	0.0244093		A_55_P2151556	C8g	-4.71672	8.52238e-05		A_55_P2121275	Gm4907	2.85048	0.0314038
A_55_P2319020	BB557941	-2.44686	0.00828158		A_55_P2173634	Samd3	-2.26609	0.00193625		A_55_P2151428	Fut9	2.37607	0.00211603		A_55_P2121225	Cyp3a11	-8.53814	0.0248574
A_55_P2318955	4930417H01Rik	-2.72492	6.79924e-05		A_55_P2173601	Csmd2	-2.13964	0.002329		A_55_P2151308		-5.00006	0.0032989		A_55_P2121185	Omp	2.3498	0.0461727
A_55_P2318934	1200007C13Rik	31.4331	0.000166172		A_55_P2173452		2.22759	0.000339541		A_55_P2151006	C1qtnf7	2.0292	0.0177037		A_55_P2121151	Znf41-ps	2.1032	0.0353028
A_55_P2318584	Aqp8	-8.38195	0.000330129		A_55_P2173398		-2.11228	0.0225075		A_55_P2150976		-9.27759	0.00389716		A_55_P2121076	Cul2	-2.06759	0.0148322
A_55_P2317570	1700051A21Rik	4.58138	0.00221825		A_55_P2173350	Vmn2r5	-2.6659	0.00992396		A_55_P2150603		-3.7721	0.036586		A_55_P2120931	Dleu2	-2.82636	0.0221646
A_55_P2316041		-4.48723	0.0175444		A_55_P2173233	Galntl5	-2.16825	0.00625219		A_55_P2150442		-2.26567	0.000214559		A_55_P2120919		-5.20051	0.00919243
A_55_P2315762		-3.01835	3.76173e-05		A_55_P2173199	Vmn2r4	2.45767	0.0234451		A_55_P2150323		-3.01972	0.00621116		A_55_P2120662	Mob3b	-2.13522	0.00478098
A_55_P2314396		2.67236	0.000392105		A_55_P2172898	2610100L16Rik	-2.18431	0.00208797		A_55_P2149942	Ninj2	3.1033	0.0133623		A_55_P2120169	Myh8	5.16742	0.00962125
A_55_P2314229	C920021A13	6.22521	0.000998753		A_55_P2172624	Gm1123	4.70374	0.0165083		A_55_P2149921		6.70862	0.000484342		A_55_P2120155	Ccdc88b	2.25053	0.00318329
A_55_P2313133	1700040D17Rik	2.02437	0.0124844		A_55_P2172532	Sult2a6	635.98	0.000131798		A_55_P2149896	Fam211a	13.319	0.000394875		A_55_P2119985	Baiap2	2.09243	0.0105783
A_55_P2312654	BB070754	3.26241	0.0195753		A_55_P2172470	Nrgn	2.11066	0.0068097		A_55_P2149719	Atp5k	-2.06416	0.000562408		A_55_P2119969	Bdh2	-5.73627	0.0095122
A_55_P2311591	AU015723	2.01623	0.0442169		A_55_P2172354	Ms4a18	-2.22525	0.00136508		A_55_P2149654	Dtx3	2.95594	0.0139242		A_55_P2119927		2.07576	0.0108988
A_55_P2308835	E130110O22Rik	-2.35123	0.000597584		A_55_P2171897	Notch1	2.03856	0.0350564		A_55_P2149382	Gm3448	2.90297	0.0111571		A_55_P2119907	Dnahc11	-4.45526	0.00353696
A_55_P2308743	A430106A12Rik	5.01378	1.76959e-05		A_55_P2171785	Gm10485	2.39703	0.00596859		A_55_P2149363	6430548M08Rik	3.5733	0.00131167		A_55_P2119892	Erbb4	-10.5475	0.015745
A_55_P2308239	Ccr9	-3.1493	0.000271815		A_55_P2171683		-2.93699	0.0288608		A_55_P2149288	Cmya5	-2.90339	0.0294828		A_55_P2119737	AA414992	3.72065	0.00500156
A_55_P2307621	5730526G10Rik	2.08138	0.00903971		A_55_P2171325	Gm10588	-2.16139	0.00196701		A_55_P2149269	Galt	-2.55141	0.000148477		A_55_P2119458	Slc25a44	-2.13118	0.00266291
A_55_P2307603	R74862	-2.55624	0.00272871		A_55_P2171258	Gm13180	-9.90652	0.00248163		A_55_P2149209	Camk2a	2.42112	0.0172218		A_55_P2119440	Vma21	2.41529	0.0310258
A_55_P2307339	1700087I21Rik	-3.72934	0.00430788		A_55_P2171196		4.0689	0.00047961		A_55_P2149149		-2.20965	0.00782025		A_55_P2119257	Serpine1	14.4726	0.0262825
A_55_P2306893	4931406E20Rik	2.16185	0.00953045		A_55_P2171086	Prcp	4.55265	0.00236491		A_55_P2149083	Fpr-rs6	3.29934	0.00327767		A_55_P2119244	Srrm3	-2.02174	0.000751935
A_55_P2305345	Ush1c	-3.11169	0.00710174		A_55_P2170911	Gm10366	-3.10612	0.0256105		A_55_P2148935		-2.17743	0.0306258		A_55_P2119184	Olfr16	3.30447	0.0211376
A_55_P2304507	Noxa1	8.99623	0.000326529		A_55_P2170881	Arhgap26	-4.21804	0.00254491		A_55_P2148873	Cat	-3.27035	0.00746668		A_55_P2118876		16.7766	0.00418178
A_55_P2304010	AU015230	-4.84996	0.0102574		A_55_P2170718		2.24059	0.00178889		A_55_P2148534	Nr1d2	-2.47249	0.0177465		A_55_P2118866	Cmah	-2.06853	0.00018297
A_55_P2303972	D830044D21Rik	-3.67863	0.000194222		A_55_P2170681	Cdca8	-2.45197	0.0490222		A_55_P2148321	Gm15401	3.26889	0.0407292		A_55_P2118570	Cd37	3.77872	0.000937536
A_55_P2303868	5033421B08Rik	-3.41218	0.000288661		A_55_P2170673	Nudt13	-3.39854	0.0273226		A_55_P2148171	Ncmap	-2.68102	0.0112687		A_55_P2118537		2.46769	0.00411205
A_55_P2303478		-3.79697	1.67519e-07		A_55_P2170643	Kcna2	-2.46011	0.0102818		A_55_P2148071	LOC101056526	-46.9741	7.27786e-05		A_55_P2118268	Chpf	2.3354	0.00284778
A_55_P2302973	Kdm5d	-5.16255	0.0230883		A_55_P2170524	Tas2r114	-2.27736	0.00183038		A_55_P2148062	Apol7c	-2.65157	0.00396662		A_55_P2118067	4930404H24Rik	5.45946	0.00166162
A_55_P2302195	0610040F04Rik	-2.05515	0.0198907		A_55_P2170359		2.55643	0.000376801		A_55_P2148046		-2.13404	0.000649533		A_55_P2118037	Sirpa	3.18467	0.00108115
A_55_P2301995	D930002L09Rik	-2.97111	5.19241e-05		A_55_P2170279		2.02435	0.0387784		A_55_P2147846	Npcd	2.25463	0.0335155		A_55_P2117984	Vangl2	-2.24928	0.0133295
A_55_P2301941	A530030E21Rik	3.03811	0.00311298		A_55_P2170064	Catsperd	-8.24981	0.00255122		A_55_P2147803	Madcam1	7.76973	0.000700845		A_55_P2117943		-2.18651	0.00112443
A_55_P2301516	Pet100	-4.41096	0.0217908		A_55_P2170054	Gm7854	-2.24008	0.0244622		A_55_P2147791	Fam129c	2.18915	0.0272553		A_55_P2117525	Rbm3	3.98634	0.00329558
A_55_P2300596		2.32006	0.0181724		A_55_P2170009	Lactb2	-4.01878	0.00119518		A_55_P2147736	Dpysl4	-2.45324	0.00203973		A_55_P2117342		4.16338	0.00581554
A_55_P2300276		-8.56611	0.0472407		A_55_P2169963	Gm13152	-2.29605	0.0230183		A_55_P2147487	Cyth3	9.46701	0.000292399		A_55_P2116794		-3.0679	0.00326124
A_55_P2300071	4833412C15Rik	2.17337	0.0205141		A_55_P2169953		2.33616	0.0257984		A_55_P2147310	Mkl1	2.21936	0.00754045		A_55_P2116674		-3.24444	0.0212371
A_55_P2299976	1700022A22Rik	-2.39776	0.000153703		A_55_P2169888	D8Ertd82e	2.22286	0.0299128		A_55_P2147250	Caprin2	-2.90619	0.000149321		A_55_P2116272	Cyp2c38	-2.78097	0.0446869
A_55_P2299737	C79122	-2.28387	0.000201734		A_55_P2169775	Ano3	-2.56066	0.00685252		A_55_P2147220	Ak2	-3.11182	0.00385624		A_55_P2116165	Pfkfb3	2.19991	0.0108241
A_55_P2297815	2010310C07Rik	-2.93067	0.00314058		A_55_P2169669	Csf1	2.29157	0.0262156		A_55_P2147136	Akr1d1	-2.9555	0.00472051		A_55_P2116160	Ccdc106	2.27784	0.0127704
A_55_P2295671	D9Ertd720e	2.73374	0.000135687		A_55_P2169514	Fgf23	2.85217	0.0109674		A_55_P2147081	Tnfaip6	2.96545	0.0389798		A_55_P2115995	Sms	-2.07264	0.0275732
A_55_P2294295	Tanc2	2.5192	0.0474943		A_55_P2169431		-2.53578	0.0243247		A_55_P2146848	Olfr681	-3.14625	0.00174268		A_55_P2115846	Gm10836	-2.2162	0.00563794
A_55_P2294051	2410024F20Rik	-3.51505	0.0286375		A_55_P2169417	BC021767	-2.06595	0.00777891		A_55_P2146847	Olfr681	-3.50499	0.0155538		A_55_P2115330	Nrg4	9.00798	0.00949341
A_55_P2293917	1700007F19Rik	-4.78735	0.0149769		A_55_P2169415	Cgn	-2.54074	0.00295458		A_55_P2146640		-2.52418	0.00365163		A_55_P2115136	4632428N05Rik	3.59825	0.00118377
A_55_P2293414	1700001C19Rik	-2.69978	0.00118659		A_55_P2169259	Cyp3a25	-2.44368	0.0162602		A_55_P2146560	H2-Ab1	-2.68322	0.00369851		A_55_P2114995		2.94139	0.00249653
A_55_P2293013	Ces2a	-3.40063	0.000435922		A_55_P2169234	Pycr1	22.9828	0.0106416		A_55_P2146520	Carns1	-3.35317	0.0116348		A_55_P2114994		2.78248	0.0353035
A_55_P2293007	AI662175	-2.57252	7.74605e-05		A_55_P2169167	Ccdc13	-3.14546	0.0194408		A_55_P2146495	Gm10554	-6.55146	0.00899913		A_55_P2114993	Actg1	2.21522	0.00667803
A_55_P2292737	2310002F09Rik	-2.95597	0.00330947		A_55_P2169069	Gm10405	-2.67879	0.0299597		A_55_P2146389		2.20511	0.0110721		A_55_P2114938	Irf9	4.01568	0.000133082
A_55_P2292435	Slc8a1	-3.07468	0.000223401		A_55_P2169064	Olfr1474	-9.14491	0.00095231		A_55_P2146254	Ifitm1	3.39139	0.000122837		A_55_P2114318		2.8794	0.0110861
A_55_P2291776	4833447P13Rik	-3.15751	0.0016577		A_55_P2168736	Relb	6.93628	0.00144144		A_55_P2146177	Cerk	3.65905	0.00404487		A_55_P2114187		19.6234	0.00322272
A_55_P2291185	5430435K18Rik	-2.38562	0.000119098		A_55_P2168732	Polr3e	2.22887	0.0460206		A_55_P2145977	Fbxw15	8.3927	0.00320624		A_55_P2114110	Cadm4	2.52015	0.00100537
A_55_P2290388	Rorb	2.60573	0.0158928		A_55_P2168707		-2.03609	0.00189204		A_55_P2145942	Atg16l1	2.57516	0.000416501		A_55_P2113738		-3.08469	0.000722303
A_55_P2289819	Cd163	4.94755	0.017808		A_55_P2168687		-2.10958	0.00319832		A_55_P2145833	Dmpk	3.22978	0.010418		A_55_P2113690	Raph1	2.4462	0.00766042
A_55_P2289800	Fryl	-2.37315	0.00234528		A_55_P2168417	Cul2	-2.44598	0.000453523		A_55_P2145680	Rilpl1	2.15721	0.00587976		A_55_P2113683	Raph1	2.28274	0.00217403
A_55_P2289040	AI429363	3.78443	0.00781491		A_55_P2168256	Gm3881	-3.43855	0.0101096		A_55_P2145617	Krt80	-2.56597	0.00871728		A_55_P2113587		-2.86723	0.0198806
A_55_P2289035	B230308N11Rik	-2.41441	0.00202832		A_55_P2168178	Olfr1226	-2.07557	0.00231191		A_55_P2145531	Mpst	-2.01357	0.00491875		A_55_P2113498	Klrd1	12.2766	0.00131892
A_55_P2288825	Fcamr	-3.08651	9.9617e-05		A_55_P2167955	A230006K03Rik	2.02358	0.0182165		A_55_P2145470		3.8421	0.0118911		A_55_P2113439	Caln1	-2.25572	0.000907723
A_55_P2288690	1700066J03Rik	-4.27171	0.0199646		A_55_P2167893	Hs3st3b1	2.97742	0.0146088		A_55_P2145287	Srd5a2	-2.09818	0.00533963		A_55_P2113210	Cyth4	4.63184	0.000224994
A_55_P2288645	LOC497255	2.61656	0.00862571		A_55_P2167840	Gm14151	-2.29899	0.0473121		A_55_P2145224		-3.14089	0.042057		A_55_P2113165	Camkk1	5.27961	0.00929705
A_55_P2288232	Gucy1a2	-2.13155	0.00143969		A_55_P2167833	4930431F10Rik	-2.10284	0.00328185		A_55_P2145159	Six3os1	7.51623	0.0318053		A_55_P2112986	Klk1b22	-5.54441	0.00454777
A_55_P2288162	1700006F04Rik	-2.32731	0.000154793		A_55_P2167406	Zfp944	2.33366	0.00373418		A_55_P2144736	Prelp	2.94379	0.0427414		A_55_P2112693	Sipa1l1	-2.49618	0.00752987
A_55_P2288047	Igkv6-15	-3.24605	0.000570275		A_55_P2167160	Hdhd2	-2.06237	0.00658829		A_55_P2144716	Hecw2	2.19859	0.021489		A_55_P2112484	Rwdd3	-2.0035	0.000878214
A_55_P2287760	0610038L08Rik	-2.66452	4.70261e-05		A_55_P2167123	Gm12839	-4.21554	0.030431		A_55_P2144686	Dmbt1	26.7822	0.0224676		A_55_P2112404	BC051628	2.9585	0.0428607
A_55_P2287260	Snap23	2.62531	0.00107279		A_55_P2166858		-2.32857	0.000870917		A_55_P2144597	9030025P20Rik	-2.01045	0.000547099		A_55_P2112360	Arhgap17	3.50088	0.00803281
A_55_P2286176	C030009O12Rik	-2.37148	0.00126901		A_55_P2166809		2.59978	0.0118052		A_55_P2144386	Emr1	3.39631	0.0401779		A_55_P2111980	Hsd3b5	-63.272	0.049023
A_55_P2285526		-3.35559	0.0146026		A_55_P2166758	Gpx5	-2.22502	0.00137475		A_55_P2144376	Gm11123	-2.14409	0.0381731		A_55_P2111832		-2.00719	0.0289704
A_55_P2283764	Gm10732	-3.46549	0.00578623		A_55_P2166501	Cd44	2.96739	0.0389178		A_55_P2144256	Usp17lc	-3.03928	0.0310558		A_55_P2111523	Higd1b	-2.03684	0.00115868
A_55_P2283551	2810455B08Rik	2.79129	0.033226		A_55_P2166486	Cd44	-2.27864	0.0296422		A_55_P2144090		-4.33723	0.0253312		A_55_P2111459	Trpv2	2.96951	0.00027204
A_55_P2283119	A530020G20Rik	-2.61505	0.00934664		A_55_P2166326		3.81183	0.0214791		A_55_P2143923	Slc13a2	-11.5087	0.0150761		A_55_P2111331	Klhl32	-6.32216	0.00255107
A_55_P2282904		-6.43813	0.00038638		A_55_P2166148	H2-M9	2.03356	0.0488406		A_55_P2143869	Skint5	2.39474	0.0427015		A_55_P2111322	Iglv1	6.12701	0.00767803
A_55_P2282361	1300015D01Rik	8.49391	0.0258998		A_55_P2166020	Ifna13	2.37495	0.0259456		A_55_P2143851	Gm996	-2.83707	0.00197514		A_55_P2111302	Cp	2.18295	0.00056462
A_55_P2282336	4933425M03Rik	-2.34929	0.0308571		A_55_P2165839	Cebpe	-2.70075	0.00885382		A_55_P2143708		-2.31211	0.0249709		A_55_P2111292	3110009E18Rik	-2.3877	0.00740376
A_55_P2280841	Gm3822	-2.82162	4.69714e-05		A_55_P2165774	Cenpo	-2.06782	0.0445831		A_55_P2143572		3.57026	0.0433613		A_55_P2110758	B430306N03Rik	3.82518	0.00164369
A_55_P2280821	Dlc1	-2.41428	0.00225702		A_55_P2165554		4.96909	0.021599		A_55_P2143516		-2.82853	0.0289081		A_55_P2110698	Krtap4-9	-2.51636	0.0272426
A_55_P2279997	4930549C15Rik	2.60515	0.0059463		A_55_P2165401		4.62785	0.00018308		A_55_P2143436		-5.64205	0.00442082		A_55_P2110671		-2.34854	0.0388368
A_55_P2279957	5730414N17Rik	-2.59799	2.18882e-05		A_55_P2165293	Atrn	-2.10625	0.00431308		A_55_P2143431	Nfib	-2.23973	0.00538953		A_55_P2110615	Slc37a2	2.09535	0.0196826
A_55_P2279762	6330415B21Rik	3.61024	0.0116174		A_55_P2165249	Papln	2.21058	0.0235929		A_55_P2143406	LOC101055798	2.50293	0.0470477		A_55_P2110497	Ddc	-2.31189	0.0255923
A_55_P2279690	2900076A07Rik	2.58652	0.0445832		A_55_P2165239	Abl1	2.18991	0.0319836		A_55_P2143279	Nkd2	2.34681	0.00876235		A_55_P2110086	Rasgrp1	3.79568	0.0214282
A_55_P2279685	2900076A07Rik	-2.00218	0.0161122		A_55_P2165091	Acnat2	2.2986	0.00936263		A_55_P2143251	Rims3	4.98709	0.00460023		A_55_P2109932	Tmem63b	-2.05479	0.0132108
A_55_P2279250	D8Ertd503e	-2.97326	3.86721e-05		A_55_P2164977	Tcf24	4.89866	0.00104954		A_55_P2143070	Ass1	-3.23729	0.0148504		A_55_P2109922	Gm2921	-2.81729	0.00523484
A_55_P2279140	F830014O18Rik	8.71041	0.00433063		A_55_P2164764	Olfr965	-2.43409	0.0137998		A_55_P2143030	Timd2	-2.27053	0.000398361		A_55_P2109857	Rgs2	2.93162	0.0067683
A_55_P2279035	9030419F21Rik	3.89303	0.00186021		A_55_P2164714	C7	-4.71454	0.000687232		A_55_P2142941		-2.24429	0.0315317		A_55_P2109702	Shb	3.62932	0.00418777
A_55_P2278965	5430420F09Rik	5.39422	0.00803399		A_55_P2164694		-2.34752	0.0435832		A_55_P2142758	Slc9a7	2.87841	0.0333268		A_55_P2109613	Ahr	2.27952	0.00524204
A_55_P2278775	9130016M20Rik	-2.88108	0.00571003		A_55_P2164303	Tas2r117	-2.49436	0.0090928		A_55_P2142724		-5.76005	0.00209371		A_55_P2109107		-3.74457	0.015917
A_55_P2278551	1700037F03Rik	-2.0968	0.0364434		A_55_P2164172	Rs1	-3.69898	0.0263816		A_55_P2142662		24.9888	4.29086e-06		A_55_P2109099		-2.33072	0.0200895
A_55_P2278531	C920008N22Rik	2.2836	0.036602		A_55_P2163873	Uox	-2.22852	0.00964188		A_55_P2142425	Gm19333	2.75228	0.016299		A_55_P2109043	Trav9d-3	-2.14897	0.0142457
A_55_P2277171	Gm10134	7.39811	0.000989441		A_55_P2163749		3.84091	0.0106175		A_55_P2142321	Synpo	2.15279	0.00851956		A_55_P2109003	Gm4117	2.64855	0.00737873
A_55_P2277014	AA522020	4.14167	0.00186802		A_55_P2163725	Slc7a9	-2.65632	0.0410292		A_55_P2142232	Serpina3i	170.899	0.00216911		A_55_P2108943	Ccr6	2.82277	0.0247348
A_55_P2276105		2.03498	0.0256823		A_55_P2163398	Olfr611	2.92233	0.0204154		A_55_P2142226	Serpina3f	6.47435	0.00201857		A_55_P2108678		2.12288	0.00131156
A_55_P2275817	C430042M11Rik	-2.38091	0.00131611		A_55_P2163363		-2.09489	0.00304437		A_55_P2142146	Glul	-3.06417	0.00175277		A_55_P2108609	Srgap3	-4.16631	0.011256
A_55_P2275590	A630012P03Rik	-2.9314	1.94348e-05		A_55_P2163353	Sox3	-2.09606	0.00290134		A_55_P2141978	Nr3c2	-2.33234	0.026631		A_55_P2108255	Lgmn	2.79617	0.0027243
A_55_P2275437		-2.50211	0.0203602		A_55_P2163319	Peg3	-2.29863	0.00108031		A_55_P2141786	Pard6g	2.45596	0.00786106		A_55_P2108077		5.15945	0.01706
A_55_P2275030	G630055G22Rik	-2.03665	0.00968794		A_55_P2163138	Tm4sf5	-2.38089	0.00627788		A_55_P2141729	Snrnp27	-3.71775	0.00209145		A_55_P2107785		3.18793	0.00664135
A_55_P2274837	A830029E22Rik	-2.37635	9.44189e-05		A_55_P2163090	Gm10220	-2.18074	0.03246		A_55_P2141105	Ighv5-12	4.00521	0.00689206		A_55_P2107682		-2.70053	0.00115367
A_55_P2274508	4933416E03Rik	-3.01599	3.01011e-05		A_55_P2162970		-2.40308	0.0239546		A_55_P2141068	Mcu	-2.7927	0.000519593		A_55_P2107528		-6.19789	0.00858087
A_55_P2273959	G930009F23Rik	-2.33186	0.0143629		A_55_P2162815	Fbxo31	2.28341	0.00244073		A_55_P2141058	Gm4477	-3.47926	0.0447975		A_55_P2107499	Galntl4	2.77625	0.014512
A_55_P2272563	4933416O17Rik	-2.3217	0.000100074		A_55_P2162797		5.34263	0.00450618		A_55_P2140751		2.88127	0.00424735		A_55_P2107207	Gpr137b-ps	2.31622	0.014154
A_55_P2272311	4930500G05Rik	-2.22667	0.0112584		A_55_P2162727	Asic3	-2.35279	0.0280181		A_55_P2140546	Slc25a51	2.02631	0.00625879		A_55_P2107065	Mcm8	-2.35027	0.0139698
A_55_P2271416	1700022F17Rik	-2.4938	9.37907e-05		A_55_P2162543		2.67396	0.0089037		A_55_P2140212		5.12073	0.000113264		A_55_P2106844		-6.20949	0.0130776
A_55_P2270740		2.96742	0.00102743		A_55_P2162394	Pdp1	2.58531	0.0282522		A_55_P2140171		-2.51126	0.000167813		A_55_P2106801	Bglap3	2.10463	0.0282089
A_55_P2270137	B930036G03Rik	-2.37859	6.52164e-05		A_55_P2162122		-2.07385	0.00287336		A_55_P2140042	Krt31	-3.0183	0.000597717		A_55_P2106584	Pcdha8	-2.41533	0.00055485
A_55_P2269988	5930438M14Rik	-3.22376	0.000412785		A_55_P2162060		-2.18143	0.0210979		A_55_P2140002	Tnfaip8	2.50991	0.0137003		A_55_P2106394	Knstrn	-2.33108	0.015377
A_55_P2269497	Pdp1	4.84528	0.000334832		A_55_P2161858	Pdlim7	3.3464	0.00838925		A_55_P2139625	Gtf2a2	2.92269	5.90671e-06		A_55_P2106241	4930432K21Rik	-9.82242	0.000316428
A_55_P2269254	5730419F03Rik	2.77787	0.0024731		A_55_P2161675	Zfp133-ps	-2.2804	0.0377543		A_55_P2139396	Unc45b	2.22736	0.0280626		A_55_P2106180	Dnahc2	3.50111	0.00777211
A_55_P2269154	A330093E20Rik	-2.51205	0.000100289		A_55_P2161640	Slc38a1	2.6402	0.0397896		A_55_P2139089	Slc22a28	-7.43303	0.000108307		A_55_P2105963	P2ry10	3.90966	0.0132235
A_55_P2267240	4930471G03Rik	-3.49449	0.000271429		A_55_P2161595	Hpca	2.6843	0.0275054		A_55_P2139087	Slc22a28	-21.1328	9.55243e-06		A_55_P2105843		2.27453	0.00340445
A_55_P2266013	Gm13032	4.17943	0.00077313		A_55_P2161380	Galr3	2.16671	0.0342865		A_55_P2139014	Lcn6	-2.43545	0.0015763		A_55_P2105542	Pde2a	2.43913	0.00279414
A_55_P2263728	AU045094	-2.92379	5.44846e-05		A_55_P2161337	Pkib	-2.17484	0.00265211		A_55_P2138856	Gm1698	-2.36925	0.00537244		A_55_P2105152	Trim59	2.52854	0.0228077
A_55_P2263342	1700029M20Rik	-3.67188	0.0203272		A_55_P2161055	Trp63	4.36123	0.000478694		A_55_P2138792	Fdx1	-2.65303	0.000506405		A_55_P2105140	Mrap2	45.457	0.00157341
A_55_P2263337	4930459I23Rik	-2.63519	7.71756e-05		A_55_P2160820	Foxd4	2.19207	0.0155015		A_55_P2138718	Gm14483	-2.82638	0.00843477		A_55_P2104975	Serpina3f	6.86397	0.0230385
A_55_P2263098	A130078K24Rik	2.74293	0.00455626		A_55_P2160686	Tsc22d1	-5.60494	1.95536e-05		A_55_P2138703		-2.9459	0.0139578		A_55_P2104835	P2rx4	-2.62132	0.0046688
A_55_P2263053	Hal	-5.59456	4.17287e-05		A_55_P2160663		-2.06908	0.00330107		A_55_P2138306		2.39019	0.00448448		A_55_P2104572	6330416G13Rik	2.95935	0.00599324
A_55_P2262743	Gm671	-2.36147	0.00136704		A_55_P2160648	LOC101055815	-2.02595	0.000748602		A_55_P2137887	Mpdz	-2.56203	0.0243726		A_55_P2104487	Pld1	2.28651	0.00458812
A_55_P2262560	5730471H19Rik	2.1089	0.00022979		A_55_P2160628	Kalrn	-2.34353	0.000702317		A_55_P2137840	Mettl20	2.95738	0.0041223		A_55_P2104363	Cysltr1	2.54862	0.0327619
A_55_P2262287	5430434G16Rik	2.02804	0.0365415		A_55_P2160623	Kalrn	2.68814	0.0175615		A_55_P2137828	Gprc5b	4.43333	0.00252627		A_55_P2104076	Gm6696	3.30571	0.0199755
A_55_P2262272	4930443O20Rik	-3.6074	0.00848903		A_55_P2160456	Defb40	-2.15845	0.00203937		A_55_P2137494		2.37161	0.00177185		A_55_P2104026		-2.59629	0.0150125
A_55_P2262136	Tek	-2.22728	0.00775594		A_55_P2160296	Olfm1	-2.0421	0.0049243		A_55_P2137049	AA467197	21.3484	0.000320843		A_55_P2103846		-3.89296	0.0177872
A_55_P2262081	4930563F15Rik	2.55656	0.0301308		A_55_P2159895	Zfp52	2.69338	0.00985487		A_55_P2136976	Gm11213	-2.25722	0.00236597		A_55_P2103706		4.04031	0.0367142
A_55_P2261772	C230098O21Rik	2.87549	0.00336297		A_55_P2159830	Yaf2	-2.03672	0.000176917		A_55_P2136970		2.26273	0.0132094		A_55_P2103661	Zfp366	2.35987	0.00594085
A_55_P2259500	D130012P04Rik	2.93862	0.00185928		A_55_P2159825		-3.47344	0.0131009		A_55_P2136906	Vpreb3	-2.71226	0.00028267		A_55_P2103561	Prdx6	-2.01776	0.000786708
A_55_P2259120	D7Ertd143e	-2.61326	6.44213e-05		A_55_P2159807	Rfc4	-2.0841	0.000456698		A_55_P2136776	Sult1b1	-2.24815	0.0253098		A_55_P2103481		2.69616	0.0185268
A_55_P2258832	5230400M03Rik	4.46559	0.0016935		A_55_P2159685	Kcnj3	-2.40487	0.000632846		A_55_P2136752	Ermn	-2.4086	0.0384963		A_55_P2103249	Cxcr1	4.87995	0.0035271
A_55_P2258757	1700042O10Rik	-2.56715	8.36682e-05		A_55_P2159595		2.56955	0.0108503		A_55_P2136616		-2.14061	0.0283114		A_55_P2103225	Slc25a18	-2.6964	0.0423249
A_55_P2258612	LOC433461	-2.39033	0.00618342		A_55_P2159573	Reep6	-2.38515	0.0166697		A_55_P2136561		5.902	0.00371517		A_55_P2103097	Ccr8	8.21904	0.00118054
A_55_P2258375	Xkr6	2.18434	0.0171756		A_55_P2159500		-2.53796	0.0104543		A_55_P2136426	Prss57	-2.63282	0.00323273		A_55_P2103075	Mid2	3.62726	0.0336423
A_55_P2258261	1810008I18Rik	-3.48274	9.28145e-05		A_55_P2159480	Fam160a1	-2.37887	0.000911454		A_55_P2136410		-2.65531	0.0205648		A_55_P2103011	Sema4d	8.3777	0.00764792
A_55_P2258159	E330032C10Rik	-2.17688	0.00998553		A_55_P2159309	Synpo2	2.47868	0.00466338		A_55_P2136373	Cep250	-3.56173	0.00149038		A_55_P2102961		-2.13042	0.000879365
A_55_P2257765	Gm7111	2.6482	0.00938102		A_55_P2158962	Dixdc1	-2.05097	0.00400372		A_55_P2136318	Slc1a5	4.08592	0.0390424		A_55_P2102769	Abca8a	-7.17253	0.026109
A_55_P2257381	E330011O21Rik	-2.09083	0.00989301		A_55_P2158592	Sirpb1a	12.4664	0.00761259		A_55_P2135725	C8g	-4.23907	5.82107e-05		A_55_P2102419	Lime1	2.32882	0.0164462
A_55_P2256506	AU045717	-3.14251	0.0171125		A_55_P2158522	Pbx1	-2.61133	0.00383428		A_55_P2135521		2.71972	0.0272675		A_55_P2102350	Stambpl1	2.18973	0.0081031
A_55_P2256388	4930467D21Rik	-2.62952	8.0083e-05		A_55_P2157799	Myo7b	-2.29975	0.0373049		A_55_P2135331	Evl	3.58011	0.0082233		A_55_P2102260	Has3	-2.60118	0.00202112
A_55_P2256148	LOC100049077	-2.12696	0.0127906		A_55_P2157620	Gm10734	2.00286	0.00766806		A_55_P2135311	Nol3	3.03938	0.0020876		A_55_P2102065	Gm10639	-41.2191	0.00365801
A_55_P2255628	9430013L14Rik	3.56824	0.0129067		A_55_P2157483		2.14998	0.0283095		A_55_P2135203		-9.08111	0.000541906		A_55_P2102060	Gstm3	-9.18538	0.0153889
A_55_P2255449		-6.22561	0.000143287		A_55_P2157469	Gm10864	2.19833	0.00631374		A_55_P2135039	Hyi	-3.34953	0.00785894		A_55_P2101562	H2afb2-ps	-2.65334	0.00769077
A_55_P2255399	F630048H11Rik	4.31647	0.0028334		A_55_P2157384	Xlr5b	-2.25269	0.00333661		A_55_P2134882	Slc7a15	4.17704	0.00311078		A_55_P2101231	Aldh7a1	-4.97936	0.000225908
A_55_P2253885	Luc7l3	2.25106	0.048353		A_55_P2157370	Gm5741	2.0037	0.0162267		A_55_P2134790	Qsox1	2.24169	0.00136142		A_55_P2101055	Alpk1	21.1499	0.0018046
A_55_P2253289		3.99946	0.0166755		A_55_P2157205	Cdx1	-5.42381	0.0163297		A_55_P2134785	Zscan22	2.44602	7.66025e-05		A_55_P2100928	Ptgds	-3.85423	0.0454143
A_55_P2253195	1700025L06Rik	2.66201	0.00127756		A_55_P2156895	Tmem39b	2.00163	0.00414353		A_55_P2134725		-2.8661	0.0295775		A_55_P2100739	Cngb1	2.59974	0.0184875
A_55_P2252601	4930481B07Rik	-2.25012	0.0138143		A_55_P2156796	Pdss2	-2.20007	0.000348284		A_55_P2134616	Med12l	4.38216	0.0106332		A_55_P2100705	Auh	2.1708	0.034429
A_55_P2251181	2900076A13Rik	7.27421	0.000381065		A_55_P2156727	Gm16509	-2.08362	0.00303128		A_55_P2133910	Ttll10	2.06792	0.0177807		A_55_P2100065	Fsd1l	-2.18824	0.00128821
A_55_P2250424	9530029O12Rik	2.94897	0.00219812		A_55_P2156718		-2.64461	0.0347665		A_55_P2133637	Etfa	-2.17102	3.76225e-06		A_55_P2099961	Hist1h2ag	2.39683	0.0318849
A_55_P2250164	Pcdhgc5	2.18501	0.0486258		A_55_P2156533		-2.96614	0.0116342		A_55_P2133624		-3.41876	0.00112165		A_55_P2099952	Car1	-19.2432	0.00589601
A_55_P2249897		2.75941	0.00402908		A_55_P2156175		-2.14203	0.0433094		A_55_P2133315	Steap2	2.34977	0.000641175		A_55_P2099930	Lass5	2.02265	0.00388592
A_55_P2249556	A630081D01Rik	4.90371	0.0125972		A_55_P2156062	Pick1	-2.88167	0.0190563		A_55_P2133255	Mad2l1	-2.22134	0.0025302		A_55_P2099594	Scd3	-25.5558	0.00795844
A_55_P2248320	C430003N24Rik	2.54527	0.00226691		A_55_P2156022	Fam132b	-3.36587	0.00195952		A_55_P2133248	Gm8995	3.23632	0.000553984		A_55_P2098865	Asic5	-3.02964	0.00159996
A_55_P2248315	2310043M15Rik	3.54068	0.0132682		A_55_P2155936		-3.05854	0.038344		A_55_P2133225	Mmgt2	3.85695	6.66578e-05		A_55_P2098845	Pp2d1	-2.22662	0.0358904
A_55_P2247599	Rp1l1	-2.56804	3.53644e-05		A_55_P2155869	Klc1	3.36345	0.0119176		A_55_P2133220	Arhgef39	-6.20611	0.00197801		A_55_P2097972		-2.69966	0.00114676
A_55_P2247010	4930511E03Rik	-4.76243	0.0121296		A_55_P2155859	Olfr243	-2.18926	0.00158999		A_55_P2133125	D930015E06Rik	-2.75185	0.00533014		A_55_P2097967		3.73812	0.0338138
A_55_P2247000	AU041480	-2.62312	7.09958e-05		A_55_P2155853		-2.78244	0.00643601		A_55_P2133032	Kirrel3	2.45009	0.0264673		A_55_P2097840		-2.29743	0.02085
A_55_P2245904	9530003O04Rik	-2.17716	0.00192013		A_55_P2155367	Dytn	-2.10423	0.00282346		A_55_P2133027	Kirrel3	-2.08071	0.000286718		A_55_P2097773	Msh4	-2.29755	0.0471369
A_55_P2244871		5.91517	0.00675428		A_55_P2155362		-2.05352	0.0012223		A_55_P2132800	Zfp367	-2.82788	0.00323249		A_55_P2097398		2.79256	0.0473837
A_55_P2244722	Taf9b	3.21682	0.0247267		A_55_P2155347	Grk4	4.32342	0.014075		A_55_P2132781	Slc16a2	-2.23259	0.000176499		A_55_P2097279	Lilrb3	7.03552	0.00100019
A_55_P2244677	6720422M22Rik	2.63867	0.0218661		A_55_P2155146	Klrc3	-2.04403	0.00155103		A_55_P2132711	Tmem248	2.28849	0.000240827		A_55_P2097178	Idua	2.05431	0.00232144
A_55_P2244404	Znrf2	-4.3485	0.034385		A_55_P2154809	Morn3	-2.44174	0.0297178		A_55_P2132549	Cd48	3.54972	0.00425341		A_55_P2096917	Mreg	-2.44174	0.0214923
A_55_P2243768	D930030O05Rik	2.32766	0.0186483		A_55_P2154416	Car15	2.27521	0.0431259		A_55_P2132512	Ngef	-3.12227	0.00603698		A_55_P2096883	Steap3	-2.16616	0.0113542
A_55_P2243676	1700057H21Rik	-4.70061	0.0138364		A_55_P2154404		3.24261	0.0387609		A_55_P2132132	Gm5532	3.1793	0.00283468		A_55_P2096535	Icmt	-2.03071	0.0185345
A_55_P2243566	9430076G02Rik	-2.49612	9.66634e-05		A_55_P2154200	Olfr612	-3.28312	0.0271827		A_55_P2131820	A530006G24Rik	2.77651	0.0468439		A_55_P2096310		-2.04058	0.00433705
A_55_P2240688		4.69224	0.00353068		A_55_P2154054	Myo18a	2.00059	0.0137848		A_55_P2131253	Shroom2	-2.43733	0.00291296		A_55_P2095899	2310057B04Rik	-2.12358	0.00229554
A_55_P2240523	D930049A15Rik	-4.11981	0.0191881		A_55_P2154049	Myo18a	3.64439	0.0333326		A_55_P2131238	Ttc39a	3.71517	0.00587053		A_55_P2095196	Akr1b10	2.19827	0.0154369
A_55_P2240301	Gm20555	2.0629	0.0076316		A_55_P2153923	Slc17a5	-2.00628	0.00855365		A_55_P2131060	LOC101055780	2.76326	0.0288011		A_55_P2095064		-2.56974	0.0266306
A_55_P2239499	Tmevpg1	-2.8258	2.35854e-05		A_55_P2153753	5830411N06Rik	-2.18449	0.001743		A_55_P2130595	Jakmip1	-2.03822	0.000228684		A_55_P2095035		-2.11383	0.00203701
A_55_P2238406	6330407A03Rik	4.15398	0.012696		A_55_P2153621	Ahnak	-3.84156	0.000159903		A_55_P2130399	Rilp	-2.13734	0.0170264		A_55_P2094925	Srgn	2.81244	0.00325732
A_55_P2238132	1700081H04Rik	-4.61907	0.00872536		A_55_P2153016	Ccdc34	-2.40246	0.0254966		A_55_P2130393	Pnpla1	-2.19963	0.00209611		A_55_P2094469	Kdr	-2.81029	0.00888578
A_55_P2237440		-2.8097	2.66563e-05		A_55_P2152607	Cyp4a12b	-272.697	0.000534606		A_55_P2129771	Prrt1	2.22283	0.00631593		A_55_P2094104		4.1504	0.00309123
A_55_P2237129	St6galnac5	-2.7714	6.47012e-05		A_55_P2152248	Cpe	2.14103	0.0108054		A_55_P2129614	Itprip	7.70432	0.00251242		A_55_P2094060	Gzma	60.6664	8.56517e-06
A_55_P2236823	6430590A07Rik	4.07547	0.00640049		A_55_P2152222	Scgb1b2	-2.25241	0.00325826		A_55_P2129498	Gm5712	2.1548	0.0335249		A_55_P2094019	Slc17a4	-3.1299	0.00973418
A_55_P2236291	Ppap2a	-3.733	0.0143683		A_55_P2152049	Xrcc3	-2.1537	0.00145297		A_55_P2129449	Sult3a1	25.3846	0.0490343		A_55_P2094016	Slc17a4	-2.26588	0.000170856
A_55_P2235970	C130068B02Rik	2.02594	0.0379849		A_55_P2151956		-20.1597	0.000407881		A_55_P2129442		2.32899	0.0346626		A_55_P2093784	Pip4k2a	2.68859	0.0207343
A_55_P2235895	A630072L19Rik	4.44832	4.75016e-05		A_55_P2151685	Pira11	2.39228	0.00862527		A_55_P2129407		-2.23773	0.0425581		A_55_P2093705	Meig1	-4.91468	0.0139437
A_55_P2235426	1700069L16Rik	-2.62579	6.7883e-05		A_55_P2151609	Sorl1	6.63556	0.00758482		A_55_P2129354	Pilra	2.30027	0.033824		A_55_P2093704	Meig1	-3.59854	0.0345375
A_55_P2235059	6230415J03Rik	2.06481	0.00156166		A_55_P2151066	2210411A11Rik	-2.96624	0.0224662		A_55_P2129348	Pilra	3.7449	0.00256784		A_55_P2093277	Olfr1077-ps1	4.1221	0.00937802
A_55_P2234361	Rnf150	2.39625	0.00864193		A_55_P2151061	Gm3613	2.38782	0.0226419		A_55_P2129222	Gbe1	-3.20496	0.00070101		A_55_P2093168	Rell2	-3.41433	0.00383868
A_55_P2233462	2700022O18Rik	3.09686	0.0218764		A_55_P2150941	Olfr367-ps	-3.14293	0.0399604		A_55_P2129047	Tlr7	4.57727	0.00596419		A_55_P2093023	Xrcc6bp1	-2.79636	0.0296129
A_55_P2233373	D930023I05Rik	3.31503	0.01142		A_55_P2150866		-2.08872	0.00318545		A_55_P2128929	Cc2d2a	-3.93574	0.00138117		A_55_P2092884		-3.08881	0.00105368
A_55_P2233296	6720456H20Rik	-2.09252	0.000252389		A_55_P2150851	Pla2g3	-2.2188	0.00112508		A_55_P2128853	Ear12	13.2556	0.0027792		A_55_P2092747		-2.74822	0.0135743
A_55_P2232410	AI195470	-2.04144	0.00335111		A_55_P2150652	Socs6	-2.21923	0.00526791		A_55_P2128734	Pbxip1	2.12384	6.68154e-05		A_55_P2092717	Trim43b	2.45629	0.0460463
A_55_P2232155	D930019F10Rik	-4.47914	0.0431044		A_55_P2150476		-8.86374	0.000214368		A_55_P2128511	Ociad2	-4.96194	8.77277e-05		A_55_P2092501	Med1	-4.14297	0.0068483
A_55_P2231747		3.58895	0.0217759		A_55_P2150351		2.01672	0.0217002		A_55_P2128492	Rap1a	-2.04762	0.00357779		A_55_P2092399	Ccdc160	2.74648	0.010677
A_55_P2230968	D930050J11	3.63924	0.0265307		A_55_P2150108	Pgm2l1	2.02644	0.0341871		A_55_P2128456		3.3791	0.0271682		A_55_P2092310	Phgdh	7.7958	0.00748716
A_55_P2230913	Etv6	2.35232	0.00140284		A_55_P2150029		-2.37018	0.0186479		A_55_P2128270	Phf21a	2.84843	0.000372509		A_55_P2092219	Serpina9	-20.2088	0.0262321
A_55_P2230823	4930533K18Rik	-2.84738	5.59605e-05		A_55_P2150003	Gnat3	-2.04863	0.00531642		A_55_P2128229		-2.01232	0.00686717		A_55_P2092085	Tmsb10	2.37195	0.0222745
A_55_P2229239	9430014F16Rik	2.33668	0.0145673		A_55_P2149990		2.55612	0.00049783		A_55_P2128203		4.80206	0.0136899		A_55_P2091831	Krtap1-4	2.02886	0.00123197
A_55_P2228918	LOC101055834	-2.27236	0.000875806		A_55_P2149942	Ninj2	3.55261	0.0299947		A_55_P2128085	LOC674321	-2.15125	0.000256155		A_55_P2091736	Rassf2	4.4303	0.000118401
A_55_P2228715	5730422E09Rik	-2.16049	0.000580486		A_55_P2149896	Fam211a	10.6384	0.00420842		A_55_P2127971	Gm9112	-2.24467	0.0283776		A_55_P2091561	Olfr139	4.97761	0.00816609
A_55_P2228122	BC024137	-8.01192	5.38874e-05		A_55_P2149763	Tapbp	2.3357	0.00662881		A_55_P2127699	Pira2	2.27177	0.0259388		A_55_P2091551	Arhgap9	5.12307	0.00073648
A_55_P2227355	Ptpro	3.183	0.000648878		A_55_P2149654	Dtx3	3.1496	0.0167029		A_55_P2127672	Acsbg1	4.22822	0.00649221		A_55_P2091461	Casp4	3.06485	0.00252492
A_55_P2227321	Ptprd	-3.26373	0.0009086		A_55_P2149382	Gm3448	-2.25929	0.0249941		A_55_P2127433	Lhfpl5	3.54102	0.0395642		A_55_P2091359	Padi2	4.19513	0.00314662
A_55_P2226660	5033418A18Rik	3.19783	0.013357		A_55_P2149363	6430548M08Rik	2.6803	0.0297795		A_55_P2127357		2.12344	0.00236451		A_55_P2091193		7.04733	0.00428465
A_55_P2223502	4930465K12Rik	-2.52324	0.000103142		A_55_P2149269	Galt	-2.16347	0.00216149		A_55_P2127179		8.72941	0.00111879		A_55_P2091191	Slc28a2	5.82623	0.0243715
A_55_P2221647	AI605517	10.8919	0.00411159		A_55_P2149209	Camk2a	4.40211	0.00340079		A_55_P2126951	Zfp467	-2.01935	0.0449839		A_55_P2090617	Pilra	2.53106	0.0174868
A_55_P2221365	4930421J07Rik	4.97877	0.000197655		A_55_P2149083	Fpr-rs6	3.08759	0.000534949		A_55_P2126950	Zfp467	-2.07961	0.0347666		A_55_P2090557	Fam211a	16.6139	0.000213432
A_55_P2221236	AU024180	-3.96525	0.0179429		A_55_P2148935		2.00804	0.00659166		A_55_P2126940		4.54127	0.00132317		A_55_P2090349	Mettl5	-2.1399	0.000109054
A_55_P2221165	Il22ra1	6.57313	4.83924e-05		A_55_P2148748	Dclk1	3.85383	0.0128127		A_55_P2126870	Nsf	2.10535	0.0274073		A_55_P2090194	Plp2	2.33856	0.00762333
A_55_P2221107	9230106L01Rik	2.27872	0.0228081		A_55_P2148655	Paqr6	2.30864	0.000993156		A_55_P2126585	Zfp53	-2.29118	0.0319261		A_55_P2089913	Cd6	12.1952	0.00739621
A_55_P2219765	Wnt5a	2.88552	0.0461517		A_55_P2148531	Pithd1	-2.53607	0.00262039		A_55_P2126572	Tmem25	-2.88884	0.000163969		A_55_P2089565	Tbx22	-2.31417	0.00131473
A_55_P2219731	AI413759	-7.06165	0.000311279		A_55_P2148370		2.65502	0.00252357		A_55_P2126444	1810032O08Rik	4.15235	0.0140637		A_55_P2089233	Pou2af1	3.56638	0.0292822
A_55_P2219581	C76332	-2.45026	0.0053947		A_55_P2147831	Gimap4	2.31624	0.0120592		A_55_P2126423		2.06278	0.0352359		A_55_P2089198	Rgs7	-2.49197	0.0333435
A_55_P2219194	4930568E12Rik	-2.40105	0.000140496		A_55_P2147803	Madcam1	3.39392	0.00368073		A_55_P2126391	Srl	-4.27267	0.0267518		A_55_P2089076	Msmp	3.52115	0.0208983
A_55_P2217598	D10Ertd755e	-2.51013	0.00285857		A_55_P2147791	Fam129c	2.76439	0.00375404		A_55_P2126281		2.35045	0.00390249		A_55_P2088735	Pcnp	-3.20433	0.0029811
A_55_P2217568	D030047H15Rik	-2.69628	4.0478e-05		A_55_P2147712	Ctla4	-2.05387	0.00330982		A_55_P2126192	Lgr5	-3.65887	0.000499697		A_55_P2088145		7.98328	0.00095527
A_55_P2217553	1700085C21Rik	-2.61495	8.47592e-05		A_55_P2147654	LOC100048185	-2.02976	0.00178877		A_55_P2125811	Esam	2.18085	0.0132582		A_55_P2087607	Cp	2.0843	0.01523
A_55_P2217230	A830082N09Rik	2.73508	0.00274705		A_55_P2146906		-2.29683	0.00206091		A_55_P2125774	Ola1	-2.40126	1.21409e-05		A_55_P2087539	Clpsl2	-2.06764	0.0127216
A_55_P2216601	A730082K24Rik	-2.45772	0.000111464		A_55_P2146847	Olfr681	-8.16333	0.00109913		A_55_P2125351	Sema6d	3.28651	0.0322248		A_55_P2087399	Tex22	-5.20313	0.00237071
A_55_P2215404	2700089I24Rik	-2.61947	8.04599e-05		A_55_P2146783	Ropn1l	-2.07653	0.0161104		A_55_P2125311	Rab3b	2.97165	0.00431052		A_55_P2087292		2.93459	0.0199871
A_55_P2214348	4930469K13Rik	12.9117	9.09519e-06		A_55_P2146708	Zcchc9	-2.39562	0.0229081		A_55_P2125229	Arhgef2	4.36443	0.00268505		A_55_P2087280		-2.39505	0.000262277
A_55_P2213968	4933416M07Rik	-5.63237	0.0345612		A_55_P2146577	Gm13570	2.54523	0.00495029		A_55_P2125208	Arid5a	4.60846	0.00247354		A_55_P2087265	Ifitm1	3.04496	0.000242408
A_55_P2212663	Gm3143	-2.72634	3.99686e-05		A_55_P2146500	Ccdc107	2.02836	0.0490668		A_55_P2124976	Grhl1	2.17524	0.0359989		A_55_P2087066	Slc25a10	-2.01909	0.0022836
A_55_P2212259	4930539J05Rik	-4.8519	0.015799		A_55_P2146304	Dnajc6	-2.12953	0.00294414		A_55_P2124871	Npw	4.47433	0.00148983		A_55_P2086664	Tspan33	-2.34382	0.00264493
A_55_P2212161	2310034O05Rik	-4.05824	0.0489678		A_55_P2146254	Ifitm1	3.40217	0.00473323		A_55_P2124751	Col16a1	-2.30855	0.000185465		A_55_P2086628	Gm5590	-2.08806	0.0158806
A_55_P2212027	Utrn	2.01473	0.00602272		A_55_P2146122	Zfp763	2.29265	0.00576322		A_55_P2124736	Col14a1	-2.9443	2.81399e-06		A_55_P2086511	Ppid	-2.1318	0.00240042
A_55_P2211952	Snhg8	-2.97822	0.0102125		A_55_P2146058	Olfr247	-2.98938	0.0111811		A_55_P2124712	Ces2c	-23.7677	0.000680575		A_55_P2086510	Ppid	-2.10771	0.00104583
A_55_P2210724	Trcg1	4.17671	0.016933		A_55_P2145922	Myh9	3.63811	0.00551866		A_55_P2124523		-2.48528	0.00389978		A_55_P2086381		-3.67293	0.0150169
A_55_P2210213	4732423E21Rik	2.93552	0.00745254		A_55_P2145913	Gm9975	-2.00878	0.0386931		A_55_P2124498	Il17rb	2.65552	0.00174395		A_55_P2086334	Krt85	19.283	0.000135615
A_55_P2210011	Mroh1	2.44276	0.0326674		A_55_P2145838	Dmpk	2.03841	0.0371814		A_55_P2124461		2.6995	0.000105088		A_55_P2085880	Aco1	-2.65639	0.00279941
A_55_P2209308	9530083O12Rik	-3.60129	0.00125453		A_55_P2145833	Dmpk	3.34055	0.00238425		A_55_P2124361		-2.50499	0.0348304		A_55_P2085779	Ifi27l2b	2.60322	0.0465415
A_55_P2209298		4.8454	0.00133851		A_55_P2145775		3.19927	0.00161177		A_55_P2124273	Myo1f	5.4528	0.0013209		A_55_P2085771	Pcnxl2	2.23698	0.00149959
A_55_P2209178	C230029M16	-4.39251	0.0152384		A_55_P2145656		-2.27178	0.00873981		A_55_P2123982	Rhoh	-2.19496	0.00878383		A_55_P2085574	Nfix	-2.11765	0.000264675
A_55_P2209046	B830008H07Rik	-3.87067	0.00472224		A_55_P2145637	Ap1s3	-2.20679	0.00209514		A_55_P2123706	Plekhb1	-2.59599	0.00333495		A_55_P2085400	Gpam	-2.50056	0.0440844
A_55_P2208836	4930432N10Rik	-2.7024	0.000299377		A_55_P2145531	Mpst	-2.18388	0.0146199		A_55_P2123502	Jam2	2.76201	0.0405488		A_55_P2085150	Gm4461	-2.03958	0.0477253
A_55_P2208443	9330109K16Rik	-3.27736	0.000588258		A_55_P2145470		2.70103	0.0311225		A_55_P2123381	Fga	3.4743	0.00210569		A_55_P2084601		3.441	0.0123993
A_55_P2208260	D230019N24Rik	2.66843	0.0283476		A_55_P2145459	4930478M13Rik	-2.03956	0.00240425		A_55_P2123062	Cbfa2t3	-3.26249	0.00419055		A_55_P2084002	Aptx	-2.33787	0.000614896
A_55_P2207342	LOC101056197	-3.75751	0.000134354		A_55_P2145376	Fastk	3.3749	0.00505486		A_55_P2122987	Dlx3	-3.17337	0.00249042		A_55_P2083894		-3.24686	0.00358154
A_55_P2207220	Gm10065	5.34487	0.00148315		A_55_P2145287	Srd5a2	-2.28375	0.000269317		A_55_P2122973		2.15385	0.039157		A_55_P2083879	Vsig2	3.3131	0.0122959
A_55_P2205638	D17H6S56E-5	3.34473	0.0010476		A_55_P2145159	Six3os1	-2.14891	0.00120573		A_55_P2122841		-9.18854	0.00427562		A_55_P2083649	Alas1	4.47545	0.0153075
A_55_P2205459	Hnf1b	-2.32127	0.0234561		A_55_P2145139		2.20434	0.0115706		A_55_P2122666	Pnma3	-2.37704	0.00437274		A_55_P2083609	Dkk3	2.43886	0.0230583
A_55_P2205156	Aamdc	-3.68072	3.94137e-05		A_55_P2144961		-2.29606	0.0443765		A_55_P2122464		-6.70516	0.00441896		A_55_P2083489	Fam129a	3.371	0.0161856
A_55_P2204804	Dclk1	3.67537	0.000416223		A_55_P2144651		3.72973	1.37742e-05		A_55_P2122300	Cir1	-3.03467	0.00884899		A_55_P2083426		-2.26704	0.0332521
A_55_P2204491		-4.2119	0.0051614		A_55_P2144556	Flrt3	3.48267	0.046599		A_55_P2122260	Tmem87b	3.2413	0.000864665		A_55_P2083411	Cyp4f18	2.88271	0.00129766
A_55_P2204396	6030458E02Rik	13.3308	4.0157e-05		A_55_P2144401	Gm4319	-2.08208	0.00321541		A_55_P2122135	Olfr907	4.60435	0.035588		A_55_P2083121	Vill	6.18474	0.00114541
A_55_P2204227	B530045E10Rik	-4.93793	0.00972448		A_55_P2144341	BC033916	2.50175	0.0272207		A_55_P2121985	Plcb4	3.02741	0.00768617		A_55_P2083059	Hps1	2.53804	0.0323681
A_55_P2203284		4.09467	6.22165e-05		A_55_P2144235		-2.04142	0.00321571		A_55_P2121980	Plcb4	2.15896	0.00353697		A_55_P2083014		4.89558	0.0156856
A_55_P2202539	BC028789	3.12839	0.000662065		A_55_P2144115	1700125H20Rik	-2.95782	0.0104753		A_55_P2121956	Gck	-33.0376	0.0304484		A_55_P2082986	Hmgb1	-2.20569	0.0444593
A_55_P2202357	0710001A04Rik	-6.97545	0.0394122		A_55_P2143995	Efcab1	-3.28535	0.00496293		A_55_P2121744	Vars2	-2.1399	0.000496409		A_55_P2082880		4.05784	0.0208097
A_55_P2202029		2.39039	0.000453218		A_55_P2143923	Slc13a2	-4.56459	0.000655042		A_55_P2121613	Sox4	-2.76678	0.00249473		A_55_P2082733	Cybb	5.48368	0.00135387
A_55_P2201866	2310047N11Rik	-5.97408	4.61449e-05		A_55_P2143765	Ugt1a6b	-3.22692	5.42625e-05		A_55_P2121608	Sox4	-2.21246	0.000241567		A_55_P2082625		-2.2873	0.0118785
A_55_P2201733	4930571K23Rik	-8.28715	0.00836505		A_55_P2143446		2.25716	0.0217444		A_55_P2121491	Bbs9	2.09571	0.00176528		A_55_P2082434	Btbd11	4.72942	0.005438
A_55_P2201454	2310079F09Rik	4.2021	0.00237859		A_55_P2143441		-2.40991	0.000700162		A_55_P2121408	Tpm2	-3.34146	0.00787683		A_55_P2082235		-2.23935	0.00362312
A_55_P2201426	Gm11381	-3.20908	0.00173194		A_55_P2143436		-2.90946	0.0223813		A_55_P2121392	Acaca	-2.10861	0.00013241		A_55_P2081656		5.96358	0.0020024
A_55_P2200903		-2.57175	6.78413e-05		A_55_P2143139	Myadml2	-2.36099	0.00230014		A_55_P2121225	Cyp3a11	-29.1975	4.95996e-05		A_55_P2081615	Timeless	2.0006	0.0105568
A_55_P2200618	LOC552902	3.37068	0.0036687		A_55_P2143131	Rwdd3	-2.92387	0.0138186		A_55_P2120931	Dleu2	-3.88322	0.00808194		A_55_P2081571	Raver1	-2.70991	0.000833788
A_55_P2200319		-3.66454	0.0128392		A_55_P2142941		-4.38096	0.00118533		A_55_P2120919		-8.8759	0.0208696		A_55_P2081530	Sh3bgrl3	3.99209	5.59353e-05
A_55_P2200034	Dleu2	-2.09349	0.0079666		A_55_P2142937		3.23072	0.0308525		A_55_P2120777	Vsig10l	2.01579	0.00280623		A_55_P2081488	Pglyrp1	18.4577	0.000254076
A_55_P2199777	5830443J22Rik	2.17278	0.0175518		A_55_P2142818	Slc5a7	-2.25164	0.0100208		A_55_P2120662	Mob3b	-2.04439	0.0239907		A_55_P2081373	Glis1	-2.01546	0.0310458
A_55_P2199202	Il22	-3.26063	0.002852		A_55_P2142789	AI463229	-2.24579	0.036715		A_55_P2120577	Cited2	-3.13196	0.000255722		A_55_P2081214	Clcn6	-2.07807	0.00390541
A_55_P2199178	C030010L15Rik	-2.37194	0.0269583		A_55_P2142724		-2.67466	0.0242801		A_55_P2120354	Cib2	-2.7027	0.00402527		A_55_P2081164	Cd300lf	26.2673	0.0138332
A_55_P2199118	Bend4	2.19908	0.0402217		A_55_P2142662		14.9498	0.0388885		A_55_P2120169	Myh8	3.56787	0.0230617		A_55_P2081105	AI607873	7.92736	0.00350925
A_55_P2198983	4930415C11Rik	-4.09181	0.00911105		A_55_P2142607		-2.16024	0.00170366		A_55_P2120155	Ccdc88b	2.18458	0.0134975		A_55_P2081005	Cox7c	-2.05798	0.00521185
A_55_P2198946	Gm10768	-2.89465	0.00359349		A_55_P2142425	Gm19333	2.94106	0.0299827		A_55_P2120141		-2.35345	0.0106673		A_55_P2080995	Tgif2lx1	-2.01757	0.00758506
A_55_P2198648	5830420C07Rik	6.39598	0.00119251		A_55_P2142420		-2.9486	0.0131772		A_55_P2119985	Baiap2	2.22859	0.0477438		A_55_P2080956	Chka	-2.50536	0.0426364
A_55_P2197914	Srgap1	2.43962	0.0016779		A_55_P2142232	Serpina3i	9.00442	0.0465228		A_55_P2119969	Bdh2	-17.5263	0.00206933		A_55_P2080774	Qdpr	-2.36782	0.00054563
A_55_P2196922	Kcnq1ot1	4.69346	0.00256764		A_55_P2142226	Serpina3f	5.48675	0.00954956		A_55_P2119957	Mlxipl	-5.86259	7.62416e-05		A_55_P2080248	Cyp2j8	-2.02699	0.012008
A_55_P2196185	4930412C18Rik	-3.45476	0.000661024		A_55_P2142222	Serpina3h	-2.17036	0.0378357		A_55_P2119907	Dnahc11	-3.77389	0.00985815		A_55_P2080151	Hspa2	2.16998	0.0110493
A_55_P2195202	1700016K05Rik	-3.85672	4.62499e-05		A_55_P2142116		-2.57444	0.0215117		A_55_P2119892	Erbb4	-16.8752	0.00675578		A_55_P2080021	Papss2	-2.9578	0.0470889
A_55_P2195187	4933424G05Rik	-3.93751	0.0140405		A_55_P2142028	Clip4	-2.31857	0.0188318		A_55_P2119877	Sfrs18	2.02046	0.00226355		A_55_P2079579	Pira7	3.96499	5.83574e-05
A_55_P2195157	Dbn1	3.1929	0.000107192		A_55_P2141923		-2.47609	0.00168139		A_55_P2119772	Scn3a	2.16552	0.00349898		A_55_P2079561	Lilra6	2.49646	0.000374464
A_55_P2194054	C030014A21Rik	-2.92069	0.00185078		A_55_P2141884	Tagln2	2.6619	0.0239884		A_55_P2119737	AA414992	9.30937	0.000236785		A_55_P2079560	Lilra6	3.25951	0.000139623
A_55_P2193424	6720420G18Rik	2.20253	0.00744179		A_55_P2141729	Snrnp27	-3.93748	0.00189999		A_55_P2119628	Gnal	3.35911	0.0217842		A_55_P2079167	Dnm1	-2.6162	0.0112854
A_55_P2193419	4731420N21	2.6888	0.0104145		A_55_P2141534	Rnaseh2a	-4.47097	0.0132137		A_55_P2119458	Slc25a44	-2.74326	0.00364837		A_55_P2079142	Fam124b	2.13813	0.03265
A_55_P2193064	6720473M08Rik	3.97622	0.0130269		A_55_P2141068	Mcu	-3.15065	0.00920488		A_55_P2119440	Vma21	4.112	0.00656794		A_55_P2079079	Cd19	3.29835	0.0355301
A_55_P2192729	5830469G19Rik	2.42556	0.0460983		A_55_P2141058	Gm4477	-7.08372	0.00796231		A_55_P2119348	1700066M21Rik	-2.35172	0.00185767		A_55_P2078955	Aqp8	-13.6481	0.010193
A_55_P2192662	Lepr	3.14588	0.00512168		A_55_P2141008	Siglech	-2.48479	0.0114912		A_55_P2119257	Serpine1	24.9806	0.0489971		A_55_P2078735	AI662270	2.58209	0.0460579
A_55_P2192577	H2bfm	-2.38758	0.0245234		A_55_P2140764	Ssu72	-2.35514	0.0395336		A_55_P2119184	Olfr16	5.91942	0.00131478		A_55_P2078494	Cib3	-11.4176	0.0100364
A_55_P2192503	B930095G15Rik	3.05866	0.0046616		A_55_P2140651	Creg2	-8.32538	0.000421684		A_55_P2118866	Cmah	-3.07549	0.0288885		A_55_P2078433	Mcoln2	11.211	0.000239609
A_55_P2192397	A330023F24Rik	2.08659	0.0208344		A_55_P2140646	Creg1	-2.04139	0.00704505		A_55_P2118799	Rmi1	-2.30081	0.0100488		A_55_P2078403	Rgs19	3.49731	0.0045199
A_55_P2190591	4930579H20Rik	-2.22758	0.00170738		A_55_P2140423	Arfip2	2.02302	0.0190709		A_55_P2118709	Fam228b	-2.26367	0.0404537		A_55_P2077920	Naaladl2	-2.09834	0.018626
A_55_P2190576		2.21532	0.0420619		A_55_P2140348	Igh-VJ558	-2.19636	0.00314713		A_55_P2118570	Cd37	4.47975	0.00249409		A_55_P2077901	Cd2	12.0835	0.00238577
A_55_P2190299	Fggy	-2.39823	0.000679437		A_55_P2140280	Gm9869	-2.10207	0.00316051		A_55_P2118537		3.08604	0.00880273		A_55_P2077783	Tubb2a-ps2	-2.26199	0.00502912
A_55_P2190212	AU044157	-2.22825	0.00160076		A_55_P2140107	Cyp21a1	2.93224	0.0318661		A_55_P2118520	Col1a1	-2.19616	0.0440175		A_55_P2077671		-2.09751	0.0326459
A_55_P2189893	A630073K07Rik	3.4136	0.00425137		A_55_P2140057	Krt32	-2.38527	0.000902525		A_55_P2118309		-5.78591	8.60451e-05		A_55_P2077555	C330021F23Rik	-2.22157	0.0309785
A_55_P2189643	4933417C20Rik	2.41501	0.0322178		A_55_P2140022	Krt35	-2.24684	0.00186658		A_55_P2118268	Chpf	2.48755	0.00147213		A_55_P2077053	Itih4	6.38997	0.00205842
A_55_P2189461	9030425P06Rik	2.77741	0.0204343		A_55_P2140002	Tnfaip8	2.20591	0.0161686		A_55_P2118153	1700014B07Rik	2.58597	0.03657		A_55_P2076998	Csn1s2b	3.02036	0.0463242
A_55_P2187918	Cep55	59.4168	0.00178784		A_55_P2139942	Calca	-2.95061	0.00296831		A_55_P2118067	4930404H24Rik	7.40289	0.0006728		A_55_P2076871	Lef1	5.23576	0.000372019
A_55_P2187909	4930560O18Rik	-3.08639	0.0124287		A_55_P2139910		-2.15346	0.00293951		A_55_P2118062	Leng8	-2.48761	0.0418247		A_55_P2076861	Sema6d	2.80821	0.00546425
A_55_P2187235		-2.98332	4.84917e-05		A_55_P2139814	Fgf13	2.1644	0.0336219		A_55_P2118037	Sirpa	3.23287	0.000849706		A_55_P2076826	9430076C15Rik	-2.15471	0.00316465
A_55_P2187211		-2.86928	1.45505e-05		A_55_P2139236	A730020M07Rik	-2.74328	0.000264043		A_55_P2117943		-2.03873	0.00207475		A_55_P2076777	Mdfi	2.80827	0.0435486
A_55_P2187121	Gpr137b-ps	2.82441	0.000779897		A_55_P2139087	Slc22a28	-3.0156	0.00820931		A_55_P2117579	Ppih	-2.24946	0.00115931		A_55_P2076538	Whamm	-2.37067	0.00313943
A_55_P2187076	Sncg	-2.38277	0.0123623		A_55_P2139069	Fam38b	-2.10607	0.00162597		A_55_P2117525	Rbm3	5.59801	8.77549e-05		A_55_P2075977		-2.34384	0.0124082
A_55_P2187053	Tpm1	-3.05894	0.00299388		A_55_P2138921		-2.04795	0.00327241		A_55_P2117187	Olfr1243	4.63471	0.0320218		A_55_P2075734		-2.44828	0.0188476
A_55_P2187043	Tpm1	-2.03495	0.000457654		A_55_P2138841	Rfx3	-3.07581	0.0388463		A_55_P2116794		-4.16785	7.56556e-07		A_55_P2075657	5330426L24Rik	-2.47882	0.0175349
A_55_P2187038	Tpm1	-2.28534	0.000142866		A_55_P2138594	Cpvl	-2.10363	0.00234136		A_55_P2116689	1700024P16Rik	3.61433	7.71386e-05		A_55_P2075485	Ibsp	2.04426	0.0252632
A_55_P2186961		-5.63723	0.000117898		A_55_P2138591	Cyb5rl	-2.92315	0.0129285		A_55_P2116674		-18.3113	0.00553142		A_55_P2075294		3.24408	0.0326954
A_55_P2186942		-2.57486	6.88981e-05		A_55_P2138510		-3.25908	0.0128054		A_55_P2116650		2.51777	0.00274607		A_55_P2075263	Acnat2	4.31427	0.0135339
A_55_P2186928		-2.60545	0.000671058		A_55_P2138343	Ndufaf5	-2.46297	0.0304634		A_55_P2116621	Cited2	-3.44018	4.61507e-05		A_55_P2075200	Tor3a	2.10616	0.0350825
A_55_P2186648	Bard1	2.90003	0.00355316		A_55_P2138217	Efcab5	-2.05594	0.00297575		A_55_P2116341		2.51837	0.000163087		A_55_P2075090	Gm7257	-2.43014	0.0386334
A_55_P2186584	Shmt1	-4.38902	0.00024036		A_55_P2138104		4.29112	0.0225407		A_55_P2116272	Cyp2c38	-12.8854	7.29328e-05		A_55_P2074972	Zswim6	2.11438	0.00738353
A_55_P2186302	Gm9866	-4.12507	0.00180899		A_55_P2138100		3.40271	0.012436		A_55_P2116160	Ccdc106	2.59376	0.0106788		A_55_P2074927	Gm7932	4.01787	0.0181906
A_55_P2186282	Agxt2	-2.44012	0.00074813		A_55_P2137932		4.37514	0.00214606		A_55_P2116059	Aim1	2.19147	0.0142229		A_55_P2074703	Gm581	-2.792	0.000902969
A_55_P2186170	Oprd1	-2.84978	0.040922		A_55_P2137867	Mpp3	2.97539	5.93278e-05		A_55_P2115995	Sms	-3.4237	0.000126769		A_55_P2074656	Padi2	3.40656	0.0494432
A_55_P2186085	Atp11c	-2.67195	8.42044e-05		A_55_P2137828	Gprc5b	2.56195	0.0397581		A_55_P2115906	Dsg1c	-2.10227	0.00321425		A_55_P2074636	Adap1	3.32402	0.000213239
A_55_P2186080	Gm12680	16.9661	9.73963e-06		A_55_P2137688	Cga	4.31611	0.0139343		A_55_P2115781	Alg12	2.29973	0.005851		A_55_P2074085	Gimap8	2.13663	0.00420898
A_55_P2186051		-2.62112	0.000954226		A_55_P2137611	Irgm2	2.50599	0.0104764		A_55_P2115582	Slc20a1	3.74747	0.0151417		A_55_P2074081		-2.07225	0.0495285
A_55_P2186038		-2.60755	0.0325439		A_55_P2137452	Vmn1r207-ps	2.17883	0.0204881		A_55_P2115401	Bst1	5.30585	4.80353e-05		A_55_P2074080	Gm2710	-2.19535	0.0248024
A_55_P2186005	Sphk1	2.29165	0.0272882		A_55_P2137319		2.43816	0.00158071		A_55_P2115350		-2.33067	0.0135528		A_55_P2073754	Adam23	2.21602	0.00141273
A_55_P2185905	Nrg4	2.93419	0.0249438		A_55_P2136970		3.11337	0.00198915		A_55_P2115330	Nrg4	19.1039	0.000225143		A_55_P2073617	Fgf6	-2.17397	0.004038
A_55_P2185900	Nrg4	5.89242	0.0123303		A_55_P2136890		2.52829	0.00901046		A_55_P2115166	AI661453	-2.37854	0.00187549		A_55_P2073377	Mki67	3.72313	0.00840076
A_55_P2185890	Cfh	2.24848	0.00856352		A_55_P2136776	Sult1b1	-4.14221	0.00648824		A_55_P2115136	4632428N05Rik	3.64906	0.000976033		A_55_P2073338	Syn1	3.67097	0.0388648
A_55_P2185840	Nnmt	2.14727	0.0112977		A_55_P2136752	Ermn	2.09768	0.00553201		A_55_P2115057	Tuba1a	-2.04225	0.043928		A_55_P2072908		2.75847	0.00030778
A_55_P2185757	Stxbp4	-2.68143	0.00329731		A_55_P2136616		-4.06084	0.000969338		A_55_P2114995		2.07101	0.00281136		A_55_P2072906		2.77417	0.000434237
A_55_P2185605	Cd48	2.53301	0.00308989		A_55_P2136606	Crnn	-3.21536	0.0411894		A_55_P2114938	Irf9	2.67064	0.00275867		A_55_P2072771	Cd3g	11.514	0.00131911
A_55_P2185548	Cdk8	-2.18012	0.000437699		A_55_P2136373	Cep250	-2.08889	0.0290199		A_55_P2114789	Gtf2a2	2.18764	0.00274263		A_55_P2072661	Prex1	2.10209	0.00397496
A_55_P2185410	Gm5258	-4.53834	0.0127196		A_55_P2136318	Slc1a5	3.656	0.0417444		A_55_P2114402	Notum	-2.00072	0.00314184		A_55_P2072631	Prr5l	2.10274	0.0124169
A_55_P2185367		-5.8972	0.000403019		A_55_P2135980	Ms4a4c	-2.26716	0.0220578		A_55_P2114367	Ccdc162	-2.0571	0.0161933		A_55_P2072576	Pcdhb12	-2.20214	0.0312232
A_55_P2185359		-2.13502	0.00022753		A_55_P2135895	Gm10752	-2.06033	0.0024646		A_55_P2114342	Gm10872	2.55471	0.00455098		A_55_P2072493	F8	2.33637	0.0043123
A_55_P2185330	Gm10914	-2.90171	0.000496717		A_55_P2135341	Pkd1l2	-2.78436	0.0316429		A_55_P2114318		5.08078	0.00228506		A_55_P2072373	Msn	2.29406	0.000260985
A_55_P2185198	Asic4	-2.6036	6.15645e-05		A_55_P2135331	Evl	2.48248	0.0382043		A_55_P2114187		69.0511	0.000336579		A_55_P2072315	Gm10216	-3.97504	0.0004846
A_55_P2185185	Tmem28	-2.78934	0.00976484		A_55_P2135291	Gm7276	-2.14234	0.00202533		A_55_P2114143	Rsph3a	2.41439	0.0487603		A_55_P2072035	Thy1	13.6197	0.0011591
A_55_P2185160		-2.08706	0.00150733		A_55_P2135200	Slfn10-ps	2.30215	0.00288995		A_55_P2114133	Garnl3	2.13679	0.00671173		A_55_P2072005	Ctsc	4.26648	0.0251136
A_55_P2184897	Lbr	3.89862	0.00548184		A_55_P2135153	Obp2a	-6.33487	0.00999499		A_55_P2114118	Cadm1	-2.60977	4.95448e-05		A_55_P2071940	Mrgprb1	3.95536	0.0233806
A_55_P2184841	Olfr828	-2.84455	0.00588886		A_55_P2135149	Lcn12	2.96771	0.0203105		A_55_P2113774	Yif1b	-2.21808	0.00327152		A_55_P2071846		3.15746	0.00249694
A_55_P2184751	Eif2c1	-2.80895	0.0279636		A_55_P2135079	H2-M5	-2.03567	0.00313266		A_55_P2113683	Raph1	3.16384	0.0129591		A_55_P2071601	Ppara	-2.22383	0.0394955
A_55_P2184601	Itgal	5.57779	2.40864e-05		A_55_P2134977		-2.67967	0.00765743		A_55_P2113587		-6.85743	0.00087682		A_55_P2071596	Ppara	-2.31915	0.0106218
A_55_P2184571	Il1rapl1	-2.33454	0.0203407		A_55_P2134967	Uty	-12.9561	0.000110017		A_55_P2113498	Klrd1	2.92606	0.0221736		A_55_P2071581	Gm7710	2.09086	0.0286768
A_55_P2184459		6.06292	0.000306867		A_55_P2134616	Med12l	7.10864	0.0106487		A_55_P2113275		2.47866	0.0111124		A_55_P2071536		2.30111	0.0147668
A_55_P2184334	AA386476	2.7252	0.0438464		A_55_P2134452		2.21341	0.000346866		A_55_P2113210	Cyth4	4.09652	0.00195103		A_55_P2071466	Ncf1	2.76666	0.00100076
A_55_P2184314		-3.8905	0.000782917		A_55_P2134351	Lancl3	-2.09609	0.00327286		A_55_P2113165	Camkk1	4.04568	0.0127307		A_55_P2071447	Il21r	2.37482	0.00353543
A_55_P2184304	Efcab7	-2.61383	7.13393e-05		A_55_P2134336	Gm7742	-2.04391	0.00287919		A_55_P2112986	Klk1b22	-20.8329	0.00192307		A_55_P2071344	Anapc1	-2.14053	0.0393049
A_55_P2184299	Defb42	2.5244	0.00163681		A_55_P2133997	Abca12	-2.449	0.000805702		A_55_P2112693	Sipa1l1	-3.0348	7.4549e-05		A_55_P2071132	Tnfrsf23	2.06736	0.0172255
A_55_P2184197	Yy2	2.95642	0.0396883		A_55_P2133978	Slc38a8	-3.02406	0.0116116		A_55_P2112613	Gucy2d	2.93377	0.0024935		A_55_P2070977		-2.38429	0.0484798
A_55_P2184189	Ncf2	5.78864	0.000689164		A_55_P2133933	Tas2r115	-2.18358	0.00231167		A_55_P2112360	Arhgap17	8.45919	0.000178919		A_55_P2070944		-3.22022	0.0432354
A_55_P2184123	Atp1a4	5.55626	0.00973721		A_55_P2133910	Ttll10	2.23383	0.0066409		A_55_P2112245	Ccdc13	-3.66355	0.000126001		A_55_P2070938		-3.44079	0.00236744
A_55_P2183955	Olfr97	4.75439	0.000893733		A_55_P2133826	6430531B16Rik	2.0304	0.0226835		A_55_P2111980	Hsd3b5	-4945.02	6.43814e-05		A_55_P2070869	Lcn2	104.5	0.00761891
A_55_P2183808		-2.02443	1.9135e-06		A_55_P2133726	Susd3	-2.20373	0.00142792		A_55_P2111770	Klhl13	-2.29551	0.00018815		A_55_P2070401	4930402H24Rik	-2.499	0.028412
A_55_P2183692	Rgs19	4.03415	0.00117798		A_55_P2133637	Etfa	-2.65872	6.91464e-06		A_55_P2111459	Trpv2	4.36452	4.46644e-05		A_55_P2070262		2.02913	0.0307178
A_55_P2183668	Vwa3b	-2.24108	0.000755248		A_55_P2133568	Snhg5	-2.19653	0.0387611		A_55_P2111331	Klhl32	-6.85233	0.00401797		A_55_P2069969	Gm10639	-35.1862	0.00605354
A_55_P2183602	Tbc1d2	2.74103	0.0222164		A_55_P2133460	Gm7173	-2.05719	0.0032972		A_55_P2111302	Cp	3.17791	8.54183e-05		A_55_P2069935	Fxyd2	-2.51972	0.0479803
A_55_P2183578		-2.09348	0.0305552		A_55_P2133315	Steap2	2.06453	0.00437124		A_55_P2111292	3110009E18Rik	-2.60571	0.00196517		A_55_P2069787		-2.11976	0.0465463
A_55_P2183438	Runx1	25.6092	0.000223426		A_55_P2133310	Steap2	4.29204	0.00021896		A_55_P2111218	Ppp1r18	2.47345	0.0455836		A_55_P2069755	Tymp	-2.00293	0.0028329
A_55_P2183433	Rab30	4.15216	0.00136554		A_55_P2133248	Gm8995	4.0118	0.00239981		A_55_P2111163	S100g	-3.56817	0.00219739		A_55_P2069450		-2.07117	0.0341848
A_55_P2183393	Pds5b	-2.09544	0.00646014		A_55_P2133225	Mmgt2	2.31676	0.00763512		A_55_P2110998	Gpr153	-2.14811	0.0455264		A_55_P2069306	Ptpn18	2.66856	0.00633561
A_55_P2183032	Zfp787	-3.3735	5.1403e-05		A_55_P2133125	D930015E06Rik	-2.38202	0.0029481		A_55_P2110875	2700046G09Rik	2.54167	9.98489e-05		A_55_P2069083	Galnt12	2.97374	0.0123263
A_55_P2183010	P2rx7	2.16607	0.0307974		A_55_P2132993		-2.46083	0.0104933		A_55_P2110758	B430306N03Rik	5.23718	0.00144016		A_55_P2068812		2.65528	0.00218235
A_55_P2182950	Aqp6	-2.17289	0.00299864		A_55_P2132987	Cypt10	-2.09237	0.00297639		A_55_P2110567	Proca1	-2.17867	0.000901714		A_55_P2068708	Gm6280	-2.28617	0.0118067
A_55_P2182886		-2.60468	0.00419959		A_55_P2132741	Olfr1164	-2.25685	0.00120872		A_55_P2110497	Ddc	-2.12765	0.00574026		A_55_P2068471	Spaca4	-2.32942	0.0140581
A_55_P2182867	Sgcb	2.27403	0.00168482		A_55_P2132536		-4.33573	0.0181209		A_55_P2110351	Eppk1	2.07435	7.44645e-05		A_55_P2068265	Mif	-2.03483	0.00413683
A_55_P2182740	2310047D07Rik	3.87023	0.000308423		A_55_P2132345	Luzp1	-2.03577	0.00459261		A_55_P2110327	1700039E15Rik	5.31239	0.0346466		A_55_P2068157		-2.14745	0.00270999
A_55_P2182527	Wars2	-2.03183	0.0329871		A_55_P2132202		-2.23118	0.00117533		A_55_P2110185	Echdc1	-2.11547	0.000320452		A_55_P2067747	Psg21	-2.65742	0.0301722
A_55_P2182517		-2.6245	0.024703		A_55_P2132162	Gm14486	-3.07029	0.0178493		A_55_P2110136	Arhgap29	-2.18419	0.0023712		A_55_P2067719	Pcdhgb1	-2.33522	0.0177603
A_55_P2182437		4.31678	0.0149171		A_55_P2132128	Gm5532	-2.21677	0.00238515		A_55_P2110086	Rasgrp1	3.46554	0.0386139		A_55_P2067712		-3.49852	0.00109641
A_55_P2182433	Atg10	-2.14686	1.28833e-05		A_55_P2132104		-2.04797	0.00268868		A_55_P2110076	C1qtnf6	3.43674	0.028713		A_55_P2067518	Slc13a3	3.47211	0.000829465
A_55_P2182372		-2.18823	0.0408925		A_55_P2132099		2.6037	0.042945		A_55_P2109932	Tmem63b	-2.12004	0.00120021		A_55_P2067505	Slc16a3	4.79605	0.000515143
A_55_P2182358	Arid3a	3.62672	0.00224953		A_55_P2132014	Tekt2	-2.07707	0.0276395		A_55_P2109922	Gm2921	-3.43398	0.0194566		A_55_P2067473	Gm14015	3.57193	0.00799444
A_55_P2182273	Bin2	3.87697	0.0030367		A_55_P2131989		-4.63126	0.026913		A_55_P2109717	Kif20b	-2.71846	0.0317319		A_55_P2067041		-2.34446	0.022328
A_55_P2182222	Rab3c	2.6857	0.00268192		A_55_P2131979	42795	2.69713	0.00547805		A_55_P2109702	Shb	3.33287	0.00023108		A_55_P2066778	AB124611	5.92142	0.000790878
A_55_P2182172	Mnx1	-2.63424	0.000124607		A_55_P2131951		-2.47265	0.0072583		A_55_P2109589	Slc1a4	3.47458	0.0427386		A_55_P2066727	Serpinb6a	2.37348	0.00419368
A_55_P2182112	4833439L19Rik	-2.13867	0.000662035		A_55_P2131899	Sox4	-2.91591	0.0367947		A_55_P2109554	Serinc3	2.41374	0.00524862		A_55_P2066578	Ifi204	3.47675	0.00200575
A_55_P2181752	Apol7a	-2.93099	0.00443046		A_55_P2131820	A530006G24Rik	-2.70915	0.0270161		A_55_P2109337	Gba2	-2.26347	0.00459597		A_55_P2066548	Baiap2l2	-3.12831	0.00130198
A_55_P2181738	Lyz1	5.36615	0.000802456		A_55_P2131707	Lpcat1	3.13933	0.0271637		A_55_P2109128	Hist1h2be	-2.13875	0.0108262		A_55_P2066543	Orai2	3.20653	0.000162954
A_55_P2181542	Sult1d1	-4.29733	0.00340088		A_55_P2131663		-2.16053	0.00168198		A_55_P2109099		-2.94305	0.0242999		A_55_P2066230	Hck	4.34794	0.00123432
A_55_P2181538	Sult1d1	-2.86488	0.0116034		A_55_P2131642	Trim50	-2.39832	0.0331932		A_55_P2109003	Gm4117	2.26532	0.00237028		A_55_P2066219	Gm3455	14.0189	0.000194622
A_55_P2181419	Tcf4	2.57419	0.0182193		A_55_P2131637	Trim40	-2.06054	0.00428109		A_55_P2108948	Gjc3	3.28026	0.046267		A_55_P2066173		6.54888	0.00233205
A_55_P2181181		7.33482	1.65152e-05		A_55_P2131452		-2.01641	0.0269761		A_55_P2108693	Gm5639	-2.21172	0.00942772		A_55_P2066081	Prmt6	2.31101	0.00251305
A_55_P2181176	Nipal3	-2.11044	0.0476172		A_55_P2131328		-3.55098	0.000629234		A_55_P2108678		2.21488	0.000872836		A_55_P2065991	S100a11	3.25094	0.00121221
A_55_P2181134	Olfr1157	-2.72658	0.0012831		A_55_P2131274	Zfp663	2.18892	0.0264938		A_55_P2108609	Srgap3	-3.20116	0.0178882		A_55_P2065899	Sebox	5.05975	0.0053207
A_55_P2180949	Lcp2	5.99585	0.000103695		A_55_P2131173	Sphk2	-2.32203	0.00186126		A_55_P2108397		2.04446	0.0498897		A_55_P2065754	Krtap19-5	-2.34853	0.00637217
A_55_P2180916		-4.11201	0.00104881		A_55_P2131168	Sv2c	-2.23711	0.00137472		A_55_P2108275		-2.81935	0.0248208		A_55_P2065751	Krtap19-5	-2.64471	0.0132385
A_55_P2180909	Ccdc166	-3.15972	0.00160541		A_55_P2130997	D830050J10Rik	-3.52818	0.000784436		A_55_P2108271	Ephb6	2.74114	0.0362441		A_55_P2065651	Tcra	2.30975	0.0274926
A_55_P2180899	Aldh3a2	-5.03272	0.00310666		A_55_P2130925	Ppp2r2b	-2.36955	0.00064106		A_55_P2108255	Lgmn	3.60709	0.00129717		A_55_P2065455	Aire	-2.24978	0.00682492
A_55_P2180861		2.71365	0.000400388		A_55_P2130885	Mas1	-3.38714	0.0121581		A_55_P2108077		3.63824	0.036504		A_55_P2065434		-2.16766	0.0378261
A_55_P2180805	Pex3	-2.19442	1.67608e-05		A_55_P2130525	Arl14ep	2.58181	0.0203839		A_55_P2107785		6.35067	0.00143474		A_55_P2065394	Brwd1	-2.33027	0.00523192
A_55_P2180769	Gls	4.35342	0.000361427		A_55_P2130463	Gpr44	-2.08699	0.00270883		A_55_P2107775	Apol9a	-4.68986	3.90496e-05		A_55_P2065364	Tdrkh	-2.78618	0.00416375
A_55_P2180744	Clstn3	-3.84726	0.00631855		A_55_P2130399	Rilp	-2.11379	0.0100809		A_55_P2107682		-2.71318	0.00970359		A_55_P2065231	Gstm3	-4.22945	0.00151392
A_55_P2180531	Sik3	-2.40553	0.00066133		A_55_P2130365	Nup93	-2.37149	0.000712103		A_55_P2107528		-15.4506	1.53751e-05		A_55_P2065169	Gm11578	2.66687	0.00917306
A_55_P2180519		2.43077	0.00720737		A_55_P2130283	Nkain3	-2.08047	0.00296003		A_55_P2107499	Galntl4	2.93076	0.0100272		A_55_P2065050		-2.32839	0.00391153
A_55_P2180425	Uqcc	-2.50942	0.000128028		A_55_P2130249	Sh3gl2	-2.90575	0.0354792		A_55_P2107207	Gpr137b-ps	2.60321	0.00805216		A_55_P2064965	Gm10624	-3.44089	0.00453517
A_55_P2180216	Zfp940	7.50941	2.88252e-05		A_55_P2130243	Sh3gl2	-2.10795	0.00240238		A_55_P2107182	Gm6484	-5.47838	0.0338337		A_55_P2064333	Lama3	-5.47358	0.0119704
A_55_P2180121	Vwa8	-2.06547	0.000124519		A_55_P2129836	Inpp5f	-2.03442	0.000844759		A_55_P2107065	Mcm8	-2.52028	0.0210923		A_55_P2064043	Cd44	2.90971	0.00071289
A_55_P2179974	Spsb1	-2.23012	0.0238448		A_55_P2129761	Prrt3	2.16564	0.0434497		A_55_P2106844		-8.88255	0.000277603		A_55_P2064038		-3.1707	0.0246719
A_55_P2179691	Aknad1	-6.69938	0.0175872		A_55_P2129623	H2-M10.3	-2.24064	0.00178081		A_55_P2106603	Gm12349	3.55599	0.0118176		A_55_P2063755	Naip6	3.53635	0.00604202
A_55_P2179587	Celsr3	4.74518	0.00444626		A_55_P2129548		3.26747	0.00845207		A_55_P2106410		-4.35592	0.009368		A_55_P2063736	Gp49a	2.53373	0.0334206
A_55_P2179577	Nmur1	-2.49042	0.000109218		A_55_P2129523	Gm9519	-2.1067	0.006269		A_55_P2106394	Knstrn	-2.0755	0.0300898		A_55_P2063654	Mup20	-3.1604	0.0371836
A_55_P2179271	Ccdc30	-10.6813	0.000597101		A_55_P2129449	Sult3a1	179.046	5.15388e-06		A_55_P2106270		2.09397	0.0132764		A_55_P2063283		31.3483	0.000424563
A_55_P2179074	Ciita	-4.11749	0.00221698		A_55_P2129402	Gm9736	2.10141	0.0194573		A_55_P2106241	4930432K21Rik	-4.72224	0.00560812		A_55_P2062981	Abca9	2.19308	0.000826774
A_55_P2178971		-2.05556	0.00980227		A_55_P2129373	Capn11	-2.16424	0.0414953		A_55_P2106180	Dnahc2	5.359	0.0020219		A_55_P2062589	Mtnr1a	-3.77578	0.000210918
A_55_P2178800	Ugt1a10	-2.72768	0.00486453		A_55_P2129354	Pilra	2.09486	0.0107942		A_55_P2106068	Myh2	-4.87553	0.00159452		A_55_P2062568	Caprin2	-2.02559	0.00337981
A_55_P2178678	P2rx5	2.55825	0.0113705		A_55_P2129348	Pilra	3.82573	0.00573544		A_55_P2106039	Map3k6	11.6865	0.0002957		A_55_P2062495	Smyd1	5.2478	1.35518e-05
A_55_P2178653		4.80714	0.000307923		A_55_P2129316		2.19965	0.00101994		A_55_P2105843		4.37364	0.000153851		A_55_P2062250	Gm5524	-3.17917	0.00575397
A_55_P2178592	Rbbp9	-2.43682	0.00155652		A_55_P2129309	Foxo3	-2.48511	0.0176274		A_55_P2105632	BC024139	-2.10423	0.00229367		A_55_P2062246	Tgtp2	4.05296	0.0008198
A_55_P2178578	Tmprss4	-2.22716	0.0112964		A_55_P2129271	Tead2	2.01279	0.0073022		A_55_P2105140	Mrap2	59.7126	0.00115019		A_55_P2062213	Tmem41a	2.61551	0.0254133
A_55_P2178466	Gkn1	-2.821	0.00119703		A_55_P2128511	Ociad2	-2.76965	0.00050833		A_55_P2105017		-2.74607	0.00792704		A_55_P2062190	Gstm1	-4.06127	0.00232497
A_55_P2178317	Gm9199	-2.48668	0.000910871		A_55_P2128229		-2.68088	0.00286646		A_55_P2104975	Serpina3f	7.14741	0.0242601		A_55_P2062021		-2.87023	0.018265
A_55_P2178299		-2.73872	0.0250168		A_55_P2128213		-2.12969	0.00301026		A_55_P2104884	5430425K12Rik	2.42973	0.0344737		A_55_P2061737	Tmsb4x	2.59939	0.00772234
A_55_P2178148		-2.98819	0.000179755		A_55_P2128203		4.85816	0.0435298		A_55_P2104835	P2rx4	-2.48092	0.00360921		A_55_P2061338	Slc16a11	-2.57201	0.00159064
A_55_P2178094		-2.45321	5.80771e-05		A_55_P2128148	D830031N03Rik	2.34349	0.00255672		A_55_P2104572	6330416G13Rik	4.83818	0.00167538		A_55_P2061275	Tbx6	-2.34838	0.000890283
A_55_P2178036	Serpina6	-4.47726	0.0153824		A_55_P2128108	5830411N06Rik	-6.12339	0.0291478		A_55_P2104532	Acacb	-2.81446	0.00834731		A_55_P2061219	Ces3a	-2.67116	0.0156289
A_55_P2177953	Aqp11	-3.32727	0.000161587		A_55_P2127765	Crp	2.08704	0.0465878		A_55_P2104487	Pld1	2.40632	0.000175102		A_55_P2061104	Mup6	-4.88019	0.0130488
A_55_P2177911	Lepr	3.75359	0.00770322		A_55_P2127672	Acsbg1	5.21243	0.0251534		A_55_P2104259	Plin5	4.87124	0.000187382		A_55_P2060996		-2.00161	0.00658465
A_55_P2177658	Mast1	-3.80434	0.000256202		A_55_P2127567		-2.22526	0.00117526		A_55_P2104076	Gm6696	2.629	0.000255174		A_55_P2060991	BC005764	5.79378	0.0108989
A_55_P2177578	Atp6v0a1	3.34306	0.00074519		A_55_P2127387	Olfr1023	-2.07985	0.00332082		A_55_P2103969	Bhmt	3.7901	0.00147956		A_55_P2060897		9.20203	0.00339935
A_55_P2177513	Chrna2	-2.7875	9.03331e-05		A_55_P2127254		-2.33122	0.00103876		A_55_P2103703		-6.08991	0.00994201		A_55_P2060849	LOC101056219	3.63778	0.0105567
A_55_P2177478		-2.6346	0.000850515		A_55_P2127238	Phc3	3.39214	0.000912258		A_55_P2103561	Prdx6	-2.37975	0.0014957		A_55_P2060107	Pkm	2.53092	0.00169486
A_55_P2177426	Abcb8	-2.07327	0.00203976		A_55_P2127199		-2.80231	0.00678604		A_55_P2103412	Golt1a	3.55988	0.0214444		A_55_P2059904	Chsy1	2.05432	0.00379307
A_55_P2177371	Gm3086	-2.11957	0.008676		A_55_P2127030	Olfr820	-2.17979	0.00166552		A_55_P2103297		4.5219	0.0144923		A_55_P2059854	Cd101	2.66654	0.0372312
A_55_P2177347		2.33472	0.012253		A_55_P2126870	Nsf	2.50404	0.0147543		A_55_P2103249	Cxcr1	7.252	0.00013082		A_55_P2059820	Aadat	-2.36357	0.00182271
A_55_P2177278	DXBay18	-2.38681	0.010359		A_55_P2126820	Gm5800	2.57983	0.023347		A_55_P2103206	Dusp8	5.69689	0.00375006		A_55_P2059591		2.62575	0.0030641
A_55_P2177248	Ccdc162	-2.76678	0.00930617		A_55_P2126695	Gm5792	2.43823	0.0367381		A_55_P2103097	Ccr8	10.0968	0.00117941		A_55_P2059412	Ghr	-2.48597	0.0056792
A_55_P2177113	Nkx3-2	2.56861	0.00109269		A_55_P2126676		-2.41954	0.000687646		A_55_P2103075	Mid2	3.69793	0.0117524		A_55_P2059357	Myo7a	2.26961	0.00329138
A_55_P2177105		-2.3236	4.74208e-05		A_55_P2126528		-2.57544	0.0360524		A_55_P2103033		-4.82254	0.000140399		A_55_P2059110	Skap1	10.9095	0.00168167
A_55_P2177103	Slc25a5	-2.50258	0.000174142		A_55_P2126444	1810032O08Rik	3.93349	0.00268172		A_55_P2102828		-3.15364	0.000756941		A_55_P2058988		-2.74609	0.0149801
A_55_P2177098	Npsr1	-2.85034	3.23093e-05		A_55_P2126423		3.47977	0.0040897		A_55_P2102769	Abca8a	-26.5774	1.01674e-05		A_55_P2058962	Mcm10	-2.19443	0.0415094
A_55_P2176963	Hsph1	2.74091	0.0104615		A_55_P2126394	Pax5	-2.01928	0.00150595		A_55_P2102621	Eaf2	2.22468	0.0209297		A_55_P2058957	Syt1	-2.64535	0.00468538
A_55_P2176748	Prss50	-3.4134	0.00323251		A_55_P2126281		2.15788	0.00256649		A_55_P2102322	Yif1b	-2.40163	0.0012017		A_55_P2058942	Aldh3b1	2.28759	0.00379889
A_55_P2176738		-2.50497	8.86744e-05		A_55_P2126188	Mamstr	3.92972	0.0296105		A_55_P2102295	Tmem184c	2.68407	0.000126605		A_55_P2058783	Hilpda	3.41112	0.000657834
A_55_P2176731	Prdx6	-3.35023	0.000227177		A_55_P2125907	Gm21064	-9.30379	0.000619715		A_55_P2102260	Has3	-2.46342	0.00742256		A_55_P2058601		4.31266	0.00873822
A_55_P2176729	Prdx6	-2.72266	0.000381199		A_55_P2125862		2.21906	0.0298607		A_55_P2102095	1810010H24Rik	2.37391	0.0339809		A_55_P2058433	Cyp2c68	-2.08275	0.0039394
A_55_P2176631		-2.93762	4.37293e-05		A_55_P2125766	Ola1	-2.0669	0.00353231		A_55_P2102065	Gm10639	-56.5575	0.0105811		A_55_P2058335	Insm2	-3.32844	0.00444697
A_55_P2176623		-2.63003	8.9215e-05		A_55_P2125367	Nlrp4d	-2.11726	0.00300254		A_55_P2102060	Gstm3	-18.9931	0.000203878		A_55_P2058040		2.84464	0.0385025
A_55_P2176565	B3galt5	-2.86974	0.0470374		A_55_P2125351	Sema6d	-2.72671	0.0186328		A_55_P2102027		2.52377	0.0387229		A_55_P2058023		4.11977	0.0107086
A_55_P2176535	Cyp2j5	-2.3584	0.000353012		A_55_P2125241	Brd1	2.1711	0.0165647		A_55_P2101944		-2.29143	0.0209599		A_55_P2057994	Mif4gd	2.02795	0.00248306
A_55_P2176530	1110057K04Rik	-2.42737	0.00100512		A_55_P2125208	Arid5a	3.45997	0.00313176		A_55_P2101920	Eva1c	2.42534	0.00319898		A_55_P2057877	Pou2f2	3.45162	0.00943977
A_55_P2176470	Olfr1352	-3.48679	0.00399566		A_55_P2125154	Gm5476	-2.16531	0.00168153		A_55_P2101776	Adora1	3.47269	0.000555484		A_55_P2057803	6330403A02Rik	-2.42607	0.0181319
A_55_P2176325	Prex1	3.00562	0.000983094		A_55_P2125059	Faah	4.46437	0.0113459		A_55_P2101751	Det1	2.65755	0.00107999		A_55_P2057528	Arl4d	2.42754	0.0402853
A_55_P2176045	Ralgapa2	2.40968	0.0353991		A_55_P2124856	Ipw	-2.1506	0.00299955		A_55_P2101340	Ramp3	3.05642	0.0335553		A_55_P2057430	Lipn	-3.90969	0.0299088
A_55_P2176035	Epha10	2.16993	0.00660589		A_55_P2124812	Olfr121	-3.05376	0.0198279		A_55_P2101231	Aldh7a1	-6.38382	0.000672437		A_55_P2057212	Tpr	-2.26875	5.31244e-05
A_55_P2175892		-2.63983	6.47744e-05		A_55_P2124712	Ces2c	-6.60746	0.0102243		A_55_P2101191	Arrdc4	2.23842	0.0107846		A_55_P2056729	Igfbp2	-2.19036	0.0349269
A_55_P2175590	Gm5486	-2.52233	0.00280232		A_55_P2124641	Gxylt2	-2.05973	0.00179935		A_55_P2101088	Slc5a11	4.469	0.0190589		A_55_P2056606		2.30538	0.00313772
A_55_P2175571	Tbxas1	-3.04862	6.79928e-05		A_55_P2124549	Vwa5b1	-2.20706	0.00827039		A_55_P2101055	Alpk1	31.8475	0.00145074		A_55_P2056542	Nin	2.38178	0.000528275
A_55_P2175545	Gys2	-3.83948	0.000784404		A_55_P2124523		-5.33746	0.0253332		A_55_P2100928	Ptgds	-12.8469	0.00128142		A_55_P2056473	Spc24	-3.15817	0.0270727
A_55_P2175489	Sfxn5	-3.5549	0.00225841		A_55_P2124273	Myo1f	3.63291	0.0421867		A_55_P2100739	Cngb1	2.22657	0.0287689		A_55_P2056205	Fpr3	2.48982	0.0022742
A_55_P2175454		-4.10668	0.00494456		A_55_P2123877	Zfp616	-2.03386	0.0032502		A_55_P2100025	Zscan22	2.58549	0.0107016		A_55_P2056106		-2.95461	0.00488885
A_55_P2175444		2.00753	0.0291721		A_55_P2123711		2.08633	0.00252868		A_55_P2099952	Car1	-47.8708	4.73212e-05		A_55_P2055854	Ppara	-2.54012	0.00034404
A_55_P2175440		2.0634	0.033271		A_55_P2123706	Plekhb1	-2.27764	0.0230747		A_55_P2099594	Scd3	-121.702	0.000263264		A_55_P2055809	Rab15	-2.43064	0.0344741
A_55_P2175405	Zfp467	-3.35215	0.00041431		A_55_P2123551		2.82258	0.0114558		A_55_P2099520	H2afv	-2.94809	0.000464749		A_55_P2055708	Vmn1r48	-2.3442	0.0172396
A_55_P2175400	Zfp467	-3.55989	3.79184e-05		A_55_P2123185		-2.21608	0.00591703		A_55_P2099479	H2afz	-2.1896	0.000481409		A_55_P2055694	Ocln	-2.56251	0.00245261
A_55_P2175304		-3.46105	0.0259499		A_55_P2123057	Olfr853	-2.07551	0.00221069		A_55_P2099373	Gm12633	-2.63822	0.0312986		A_55_P2055597	Enpp2	-2.59122	0.00587216
A_55_P2175245	Tusc3	-2.46184	0.000103664		A_55_P2123029	Olfr353	4.09547	0.00590597		A_55_P2098845	Pp2d1	-2.30525	0.0381729		A_55_P2055537	Slc16a6	2.69585	0.00504784
A_55_P2175180	Gm2379	4.77695	0.0147399		A_55_P2123012	AA667203	2.36678	0.0156002		A_55_P2098573	Zfp958	-3.35381	0.0213698		A_55_P2055523		-2.35383	0.0434614
A_55_P2175065		-4.1117	0.0349391		A_55_P2122896		-4.69089	0.0230719		A_55_P2098398	Trim30c	2.09868	0.0367199		A_55_P2054942	Iffo2	2.3285	0.00126023
A_55_P2175060	Ppapdc1b	2.98606	0.00260485		A_55_P2122822		-2.21493	0.00148291		A_55_P2098354	Shf	-2.04453	0.000185346		A_55_P2054708		-2.24949	0.000716305
A_55_P2175050		-3.11587	0.000308954		A_55_P2122666	Pnma3	-2.39702	0.042152		A_55_P2098150	Krtap5-5	-2.30516	0.0446665		A_55_P2054445	Cd84	3.80574	0.0168023
A_55_P2175007	Thcytx	2.65105	0.00139511		A_55_P2122464		-3.011	0.0245132		A_55_P2097972		-2.68525	0.00363499		A_55_P2054409	Pira2	3.57377	0.00091275
A_55_P2175002	Thcytx	2.4549	0.00120358		A_55_P2122394		-6.06745	0.034147		A_55_P2097964		-2.86183	0.0270227		A_55_P2054362	Cx3cr1	3.06236	0.0371799
A_55_P2174935	Mn1	-2.6577	0.000510197		A_55_P2122374	9230020A06Rik	-2.39104	0.00166249		A_55_P2097962	9030622O22Rik	-2.79174	0.00366475		A_55_P2053838	Tnfaip3	2.0681	0.0145618
A_55_P2174646	Smr3a	-2.81166	6.16874e-05		A_55_P2122015		-2.16994	0.00118797		A_55_P2097863	L2hgdh	-2.03521	0.00249119		A_55_P2053459	Timd2	-2.05042	0.00230343
A_55_P2174633		-2.5037	9.61779e-05		A_55_P2121739	Gm10764	-2.0381	0.00325597		A_55_P2097840		-2.6963	0.00700745		A_55_P2053320	Zfr2	-2.36584	0.00559824
A_55_P2174611		-2.62891	0.00110549		A_55_P2121682	Alox12b	2.60265	0.00139791		A_55_P2097553	C77080	-2.09693	0.00197571		A_55_P2053302		4.19282	0.00321867
A_55_P2174524		2.90169	0.000739406		A_55_P2121623		-2.02491	0.00787518		A_55_P2097508	Mcc	-2.27106	0.00661518		A_55_P2053251	Gabrg3	-2.56051	0.00856989
A_55_P2174490	Cd37	3.94315	0.00642412		A_55_P2121484	Smo	2.94526	0.0258699		A_55_P2097398		5.92085	0.00163319		A_55_P2053097	Myo9a	3.01268	0.00186945
A_55_P2174308	Gm2102	2.2689	0.0489444		A_55_P2121446	Gm10751	-3.36921	0.0350039		A_55_P2097279	Lilrb3	13.3281	0.000463358		A_55_P2052897	Arhgap30	4.6228	0.00191553
A_55_P2174268	Slco5a1	-3.856	0.0135162		A_55_P2121275	Gm4907	2.4609	0.0163546		A_55_P2096967	Gjb1	-2.12949	0.00365123		A_55_P2052882	Ankrd23	-2.08597	0.00207821
A_55_P2174187	Olfr1297	-2.75884	3.59592e-05		A_55_P2121096	Fbn2	3.10312	0.0102884		A_55_P2096917	Mreg	-3.79301	0.000188556		A_55_P2052862	Fam73a	2.77544	0.0029098
A_55_P2174067	Cerk	2.75413	0.00736791		A_55_P2121081	Cul2	-2.06499	0.0140866		A_55_P2096887	Steap3	-2.05844	0.00567		A_55_P2052834	Lst1	2.69151	0.00405863
A_55_P2173952	Myh6	-2.35135	0.0208089		A_55_P2121042	Pla2g2a	-2.24809	0.00350578		A_55_P2096883	Steap3	-2.78732	0.00553138		A_55_P2052754	Pcm1	2.57416	0.0265813
A_55_P2173897	Pla2g2d	-2.29432	0.00884668		A_55_P2121023	4930413G21Rik	-2.42626	0.000749605		A_55_P2096772	Zfp11	-2.18345	0.00133304		A_55_P2052719	Nadkd1	-2.06405	0.00211012
A_55_P2173892	Isg20	4.41019	0.00138066		A_55_P2120734		-4.34107	0.0155545		A_55_P2096737	Elmod3	2.74977	0.00255493		A_55_P2052385	Gbp6	-2.2189	0.0439493
A_55_P2173862	Gm7616	-2.46814	0.000215012		A_55_P2120662	Mob3b	-2.20054	0.000115729		A_55_P2096699	Calcoco2	2.37797	0.00686966		A_55_P2052380	Gbp6	-2.05522	0.00109694
A_55_P2173664	Gm626	-3.46798	0.00114047		A_55_P2120308	Cacna1a	-3.10004	0.0257202		A_55_P2096422	Inhbb	16.282	0.00460388		A_55_P2052290	Psat1	4.01351	0.00771184
A_55_P2173576		2.15584	0.0047581		A_55_P2120219	Rad51b	4.18217	0.036325		A_55_P2096375	Dydc2	3.92253	0.0164172		A_55_P2052145	Ly6g6d	3.18085	0.00406664
A_55_P2173452		2.80353	1.03718e-05		A_55_P2119972		-3.26349	0.00141632		A_55_P2096370	LOC101056423	2.3572	0.0310591		A_55_P2052056	A3galt2	2.40091	0.0465001
A_55_P2173408		-4.69077	0.0316327		A_55_P2119969	Bdh2	-2.44278	0.0266172		A_55_P2096174	5830473C10Rik	-2.32497	0.00946926		A_55_P2051879	Ccdc171	-2.25717	0.0322985
A_55_P2173398		-3.40856	0.00193647		A_55_P2119628	Gnal	2.22992	0.00111026		A_55_P2096127		-2.49363	0.0223796		A_55_P2051741	Lbx1	-2.22423	0.0347661
A_55_P2173353	Mroh5	2.01569	0.00125939		A_55_P2119613	Prss55	-2.33642	0.00538862		A_55_P2095880	Nfix	-2.56426	0.00466174		A_55_P2051666	Nfkbib	3.84457	0.0229953
A_55_P2173350	Vmn2r5	-3.28224	0.00338034		A_55_P2119302	Cspp1	2.23292	0.0128093		A_55_P2095784	Gemin6	-2.17502	0.0171133		A_55_P2051486	Mup20	-2.20888	0.0143866
A_55_P2173288	Pcdhb1	-2.73943	0.0270295		A_55_P2119274		3.52383	0.00600172		A_55_P2095609	Fut4	7.59955	0.0170543		A_55_P2051414	Axl	2.43722	0.00162418
A_55_P2173233	Galntl5	-2.66257	0.00115446		A_55_P2119244	Srrm3	-3.65998	0.00421021		A_55_P2095513	Try5	3.59751	0.0136089		A_55_P2051254	Pvt1	-2.19882	0.00605749
A_55_P2173199	Vmn2r4	2.96677	0.0129603		A_55_P2118873	1700054O19Rik	2.2339	0.0230197		A_55_P2095508	Pvrl3	-2.43083	0.00396234		A_55_P2051229	Gpr132	5.93953	0.0164083
A_55_P2173059	Cpvl	-2.44669	0.0016042		A_55_P2118839	Gm15514	-2.29897	0.0011224		A_55_P2095488	Syncrip	2.0442	0.00202906		A_55_P2051159	Upp2	-5.59529	0.0141364
A_55_P2173011	Nfasc	3.14738	0.00310805		A_55_P2118724	Olfr1199	-2.30942	0.00166904		A_55_P2095271	Pkn3	-2.59585	0.0108698		A_55_P2051120	4430402I18Rik	-2.30322	0.0285389
A_55_P2172892	1700080G18Rik	-2.18673	0.00694588		A_55_P2118709	Fam228b	-2.99503	0.00572563		A_55_P2095251	Ell3	-9.49285	0.000306369		A_55_P2051099	Tnfrsf1a	2.63245	0.000592237
A_55_P2172832	Kcne1l	-2.4715	0.00543176		A_55_P2118570	Cd37	3.89534	0.0216191		A_55_P2095103	Gucy1a2	-3.72625	0.00745378		A_55_P2051052	Ankrd61	-2.27625	0.0468634
A_55_P2172624	Gm1123	5.3118	0.0133313		A_55_P2118312	C230012O17Rik	-2.91323	0.0216644		A_55_P2095039	Ncmap	-4.35794	0.0205869		A_55_P2050778	Gpam	-2.663	0.017195
A_55_P2172532	Sult2a6	97.8646	0.000127413		A_55_P2118259	Olfr1349	3.83668	0.0022487		A_55_P2094925	Srgn	3.67284	0.00185064		A_55_P2050354	Prpmp5	-2.24841	0.00747144
A_55_P2172470	Nrgn	2.42811	6.96104e-05		A_55_P2118037	Sirpa	2.97162	0.0127025		A_55_P2094626	Ralgps1	3.24433	0.0234336		A_55_P2050044		19.9142	3.94081e-05
A_55_P2172396	A530064D06Rik	6.81153	0.028191		A_55_P2117984	Vangl2	-2.01063	0.035529		A_55_P2094469	Kdr	-2.96731	0.00741761		A_55_P2049949		-2.31238	0.00133052
A_55_P2172375		-2.51603	0.00101776		A_55_P2117853	Lhx9	-2.77798	0.00544173		A_55_P2094292	Erp27	2.24007	0.0165867		A_55_P2049854	Araf	-2.17316	0.0283488
A_55_P2172354	Ms4a18	-2.77533	4.86692e-05		A_55_P2117731	Pak4	-2.38244	0.0221222		A_55_P2094060	Gzma	11.1343	0.0412196		A_55_P2049158		-2.33854	0.0366807
A_55_P2172022	B4galt1	2.55655	0.00249889		A_55_P2117649	Slfn9	2.29673	0.0233479		A_55_P2094044	Gm15800	-2.78196	0.00347623		A_55_P2049005	Apoa5	2.18062	0.00653327
A_55_P2172001	Mrgpra2a	19.4666	0.000164344		A_55_P2117380	Asb4	6.10998	0.0107305		A_55_P2094019	Slc17a4	-6.20851	0.000229565		A_55_P2048912	Themis2	4.00208	0.000452492
A_55_P2171966	Tnfaip8l3	-3.65464	0.0136135		A_55_P2117092		-3.24712	0.0189035		A_55_P2094016	Slc17a4	-2.66492	0.0110945		A_55_P2048660		-3.29918	0.00224039
A_55_P2171863		-2.65849	6.4989e-05		A_55_P2116917	Zfp219	-2.18921	0.0158936		A_55_P2093874	Pbxip1	2.14023	0.000354326		A_55_P2048550	Hbb-bh2	-2.7986	0.00215084
A_55_P2171785	Gm10485	2.86524	0.00213258		A_55_P2116794		-2.53058	0.00664489		A_55_P2093784	Pip4k2a	2.7046	0.0194089		A_55_P2048493	4931440P22Rik	3.81127	0.00149793
A_55_P2171683		-2.05889	0.00273624		A_55_P2116674		-2.09772	0.0170583		A_55_P2093770		-4.48781	0.000523638		A_55_P2048478	Olfml1	-2.05597	0.0419387
A_55_P2171658	Stx3	2.30712	0.00176338		A_55_P2116621	Cited2	-2.96359	0.000231522		A_55_P2093705	Meig1	-9.66479	0.00160575		A_55_P2048441	Syt3	-2.35932	0.0137241
A_55_P2171493	BC030867	2.78366	0.00354308		A_55_P2116315	Trim45	-2.29461	0.00300691		A_55_P2093704	Meig1	-4.77296	0.0364833		A_55_P2048279	Tlr13	3.66771	0.000901767
A_55_P2171413	Me1	-3.60749	0.00124616		A_55_P2116305	Tnfrsf25	2.90521	0.0197335		A_55_P2093277	Olfr1077-ps1	3.18446	0.0113827		A_55_P2048221		-2.47187	0.00561145
A_55_P2171406	Tm7sf2	-2.5515	0.0117475		A_55_P2116290	Szrd1	-2.40745	0.00365743		A_55_P2093168	Rell2	-4.47791	0.00940389		A_55_P2047768	Serpinb6c	2.33696	0.00436076
A_55_P2171378	Pdzk1ip1	-2.01782	0.0292705		A_55_P2116165	Pfkfb3	3.50246	0.0205664		A_55_P2093023	Xrcc6bp1	-3.71836	9.55946e-05		A_55_P2047589		7.1672	0.00827254
A_55_P2171303	Bin3	2.68753	0.00676689		A_55_P2116160	Ccdc106	2.6467	0.0138413		A_55_P2092993	D330045A20Rik	13.4292	0.00428679		A_55_P2047559	Ccp110	2.97327	0.0346993
A_55_P2171258	Gm13180	-5.53318	0.00802394		A_55_P2116094	Gsc2	-2.211	0.000865272		A_55_P2092884		-2.67263	0.00441265		A_55_P2047285	Lcn6	3.49628	0.0172981
A_55_P2171196		4.61472	3.24026e-05		A_55_P2115981	Xlr5c	-2.21805	0.000862038		A_55_P2092831		-2.12638	0.0099492		A_55_P2046744	Cspg5	-5.72853	0.0485827
A_55_P2171116	Lgals3	5.66487	0.00253409		A_55_P2115846	Gm10836	-2.1213	0.00202527		A_55_P2092826	Anxa1	3.11554	0.00432348		A_55_P2046671		-4.75444	0.025276
A_55_P2171086	Prcp	4.7808	0.00208411		A_55_P2115582	Slc20a1	2.30876	0.0309259		A_55_P2092717	Trim43b	5.19436	0.0085605		A_55_P2046657	Dio1	-3.65338	0.00774928
A_55_P2171047	Oaz1	-2.06798	6.13887e-05		A_55_P2115458	Pot1a	-2.75579	0.0177363		A_55_P2092501	Med1	-10.2109	2.88927e-06		A_55_P2046403	Ucn3	-8.82049	0.0081382
A_55_P2170911	Gm10366	-3.53051	0.0187871		A_55_P2115330	Nrg4	13.3383	0.00057487		A_55_P2092399	Ccdc160	2.58505	0.00852229		A_55_P2046262	Phgdh	2.30626	0.0178304
A_55_P2170881	Arhgap26	-8.32438	0.000101227		A_55_P2115318	Fmr1nb	2.26889	0.0337729		A_55_P2092282		2.43494	0.0159256		A_55_P2046145	Gm10693	3.73036	0.000722197
A_55_P2170876	Tcp10b	2.70977	0.0038461		A_55_P2115220	Gm11437	-2.95738	0.000862503		A_55_P2092219	Serpina9	-23.9541	0.000338788		A_55_P2046143	Gm10693	-2.35414	0.0053748
A_55_P2170747	A230103O09Rik	-2.61847	7.33118e-05		A_55_P2115181	Pdhx	-2.30252	0.0246662		A_55_P2091831	Krtap1-4	2.43661	0.00195877		A_55_P2046096		-2.85456	0.0207558
A_55_P2170737	Igf2bp2	3.2921	0.028686		A_55_P2114959	Btnl1	-2.00278	0.0283397		A_55_P2091741	Lamp3	-2.00223	8.637e-05		A_55_P2045976		2.30312	0.031653
A_55_P2170673	Nudt13	-3.36127	0.0472097		A_55_P2114938	Irf9	4.28905	0.00101445		A_55_P2091736	Rassf2	10.8883	2.10084e-05		A_55_P2045859		-3.40692	0.00249761
A_55_P2170643	Kcna2	-3.32466	0.00210947		A_55_P2114834		-3.02867	0.0118286		A_55_P2091561	Olfr139	5.34194	0.0153867		A_55_P2045741	Fyb	3.59738	0.000348219
A_55_P2170633	Htr3b	-2.62202	5.75179e-05		A_55_P2114796	Arntl2	-2.07946	0.0031006		A_55_P2091551	Arhgap9	4.33293	0.00253692		A_55_P2045136	I830127L07Rik	5.22628	0.000330971
A_55_P2170519	4933406I18Rik	-4.14441	0.00142555		A_55_P2114769		-2.20029	0.00172842		A_55_P2091461	Casp4	3.38236	0.00486343		A_55_P2045055	Clec10a	3.47127	0.00751736
A_55_P2170515		2.61444	0.0273453		A_55_P2114670		-2.33155	0.0305956		A_55_P2091427	Smim9	2.24037	0.0432877		A_55_P2044932	Gpr84	2.69511	0.0024313
A_55_P2170454	Gsta2	-25.9559	0.000890873		A_55_P2114498	Gm8801	2.39892	0.0289273		A_55_P2091413		-5.94888	0.0208474		A_55_P2044659	Gm10532	3.02193	0.00850076
A_55_P2170394	Gm2518	7.59692	1.12191e-05		A_55_P2114452	Scaper	-2.05868	0.00272647		A_55_P2091359	Padi2	2.1633	0.0248613		A_55_P2044547	2810416G20Rik	2.57713	0.00308624
A_55_P2170359		2.27445	0.0118348		A_55_P2114367	Ccdc162	-3.50996	0.00109639		A_55_P2091279	Ublcp1	2.80793	0.0253706		A_55_P2044242	Slc13a5	57.5905	0.000227153
A_55_P2170309	Ppfibp2	-2.2541	0.00219315		A_55_P2114187		4.67517	0.0449947		A_55_P2091274	Sly	4.74086	0.000497925		A_55_P2044207	Bphl	-2.22856	0.000312354
A_55_P2170289		-2.8152	2.4419e-05		A_55_P2114143	Rsph3a	3.16282	0.00189722		A_55_P2091196	Hrct1	3.0801	0.000144514		A_55_P2044187		-2.44173	0.00576403
A_55_P2170279		2.98729	0.00141632		A_55_P2114088	Zfp385c	-2.50554	0.00316057		A_55_P2091193		4.75383	0.00378759		A_55_P2043782	Trpm1	-2.20679	0.00234118
A_55_P2170256	Ptgr2	-2.53683	8.70915e-05		A_55_P2113954	Olfr1394	-2.68264	0.00205626		A_55_P2091191	Slc28a2	6.13646	0.0224491		A_55_P2043718	Cacna1f	2.31795	0.00288788
A_55_P2170144		-5.08021	0.0303777		A_55_P2113738		-2.4443	0.00369681		A_55_P2091153	BC051142	2.65342	0.0126735		A_55_P2043657	Zfp677	2.14096	0.0315727
A_55_P2170109	Bivm	-2.63606	0.000157297		A_55_P2113690	Raph1	5.07129	0.000440628		A_55_P2091005	Emilin3	-2.88318	0.0148608		A_55_P2043652	Zfp667	2.55153	0.00351202
A_55_P2170064	Catsperd	-8.71892	0.00164883		A_55_P2113683	Raph1	2.24632	0.0424279		A_55_P2090577	Abat	-2.35044	0.0417059		A_55_P2043509	Hnmt	-2.15809	0.0193831
A_55_P2170054	Gm7854	-4.66532	0.000941146		A_55_P2113379		-2.02039	0.00320938		A_55_P2090557	Fam211a	12.5832	0.000209043		A_55_P2043182	Gimap6	2.65625	0.0026128
A_55_P2170009	Lactb2	-7.43369	1.26146e-05		A_55_P2113275		3.45728	0.0216647		A_55_P2090505		4.02776	0.000800468		A_55_P2043083	Cyp4a12a	-3.69435	0.0226011
A_55_P2169963	Gm13152	-2.54247	0.00150182		A_55_P2113210	Cyth4	3.12903	0.0164151		A_55_P2090394		-3.37235	0.00461217		A_55_P2042988	Aoah	3.80981	0.0061588
A_55_P2169953		3.41436	0.0232533		A_55_P2113176		-2.2859	0.00188322		A_55_P2090254	Sntg2	-4.02746	0.0119657		A_55_P2042923	Sgk2	-2.18143	0.0095838
A_55_P2169888	D8Ertd82e	2.08437	0.0127891		A_55_P2113165	Camkk1	3.58811	0.0218821		A_55_P2090194	Plp2	2.71287	0.00309513		A_55_P2042637	Spats1	5.25604	0.000420506
A_55_P2169784	Plod1	-2.38461	0.00490917		A_55_P2113006	Olfr1153	-8.18377	0.0380826		A_55_P2090179	Cbx5	-2.04119	0.000312335		A_55_P2042487	Dpysl3	2.37416	0.00943625
A_55_P2169775	Ano3	-3.1939	0.00199686		A_55_P2112972	Gm6288	-2.07227	0.000670373		A_55_P2089577	Tmed5	2.42855	0.00721715		A_55_P2042331	Gzmk	41.279	7.97193e-05
A_55_P2169669	Csf1	2.94246	0.00789882		A_55_P2112967	Diap1	-2.17862	0.0027957		A_55_P2089035	Pole	-3.72394	0.0351164		A_55_P2042297		-3.14938	0.00414102
A_55_P2169514	Fgf23	3.78218	0.00100914		A_55_P2112937	Olfr1033	2.39379	0.0158718		A_55_P2088905	Hpca	3.86304	0.0429095		A_55_P2042272	Pbrm1	-2.12795	0.000867283
A_55_P2169431		-2.52198	0.00461114		A_55_P2112613	Gucy2d	3.1783	0.0151967		A_55_P2088735	Pcnp	-2.08309	0.0187248		A_55_P2042126		-2.77679	0.0484172
A_55_P2169410	4930583I09Rik	-4.57007	0.0231556		A_55_P2112484	Rwdd3	-3.23645	0.00474066		A_55_P2088720		5.13673	5.52811e-05		A_55_P2042076	Dkk4	-2.30027	0.0138615
A_55_P2169356		2.21787	0.0040171		A_55_P2112459	Cldn22	-2.12817	0.00309291		A_55_P2088685	Ahcyl2	2.09176	0.000218393		A_55_P2041976	Akap4	2.80665	0.000178537
A_55_P2169259	Cyp3a25	-5.75416	0.0016379		A_55_P2112424	Madd	-2.57428	0.0185952		A_55_P2088145		7.6109	0.000877129		A_55_P2041708	Gas2	-2.89877	0.0224005
A_55_P2169247	Gm15056	-2.74738	0.0450375		A_55_P2112360	Arhgap17	3.88081	0.00121426		A_55_P2088018	Fhod3	-12.6248	0.00265377		A_55_P2041668	Foxl2	-2.36603	0.00788895
A_55_P2169234	Pycr1	58.7035	0.000164485		A_55_P2112302		2.30195	0.0325779		A_55_P2087911	Mthfsd	3.04651	0.0306665		A_55_P2041614	Cerkl	4.02853	0.00850094
A_55_P2169167	Ccdc13	-3.90651	0.0093122		A_55_P2111980	Hsd3b5	-113.731	0.00220869		A_55_P2087607	Cp	2.05943	0.0195412		A_55_P2041521	Doxl2	-3.20937	0.00413463
A_55_P2169129		-2.31335	0.0053493		A_55_P2111870	Rogdi	-2.49817	0.00089635		A_55_P2087528	D930015E06Rik	-2.34244	0.0162942		A_55_P2041470		-2.26959	0.00310834
A_55_P2169124	Slc22a30	-2.65868	0.023465		A_55_P2111776	LOC101055809	-2.22052	0.002408		A_55_P2087399	Tex22	-5.45119	0.000833658		A_55_P2041432	Il1rap	-2.91338	0.0160187
A_55_P2169069	Gm10405	-3.59913	0.00134018		A_55_P2111563		2.04974	0.0122914		A_55_P2087280		-2.28041	0.000597789		A_55_P2041286	Gm3970	-2.93141	0.00661011
A_55_P2169064	Olfr1474	-9.34088	0.00707425		A_55_P2111513	Ttyh1	-2.43874	0.0132837		A_55_P2087265	Ifitm1	3.54241	0.000239434		A_55_P2041240	Nav2	-2.51108	0.0441293
A_55_P2169039	Olfr558	-2.63035	5.34594e-05		A_55_P2111331	Klhl32	-6.44141	3.57498e-05		A_55_P2087066	Slc25a10	-2.04216	0.0195182		A_55_P2041090	Tyw5	-2.41387	9.62959e-05
A_55_P2169010	Ndfip1	-2.18109	0.00096386		A_55_P2111197	Arhgap24	-4.99313	0.00717496		A_55_P2086785	Olfr362	-2.94104	0.00206276		A_55_P2040962	Gm1604b	-2.77903	0.00301618
A_55_P2168959	LOC100040235	-2.68619	0.00423184		A_55_P2110910	Flrt1	2.76005	0.0129609		A_55_P2086730	Olfr910	-2.47868	0.0270974		A_55_P2040860	Sun3	-3.37371	0.0498432
A_55_P2168736	Relb	16.352	6.69487e-08		A_55_P2110758	B430306N03Rik	3.1503	0.0264297		A_55_P2086692	Nfib	-2.14336	0.00408203		A_55_P2040838	Gm14548	5.17445	0.0003009
A_55_P2168722	Fmo5	-2.97802	0.0269284		A_55_P2110615	Slc37a2	2.22231	0.00254689		A_55_P2086664	Tspan33	-2.81622	0.00539315		A_55_P2040485	Ms4a4a	10.5007	0.0243118
A_55_P2168707		-2.65988	7.84831e-05		A_55_P2110584	Gm10369	-2.68842	0.00213149		A_55_P2086511	Ppid	-2.5358	0.000277729		A_55_P2040476	Dio3os	-2.51999	0.0382163
A_55_P2168667	Rbpms2	-3.0183	1.90401e-05		A_55_P2110567	Proca1	-2.63889	0.00408261		A_55_P2086510	Ppid	-2.45602	7.29829e-05		A_55_P2040255	Gm10033	-2.17403	0.0168969
A_55_P2168663	Atp5k	-2.16371	0.00119014		A_55_P2110537	Slfn9	2.32472	0.000983968		A_55_P2086423	Recql4	-2.4452	0.0213147		A_55_P2040245	Fam38b	2.28824	0.0120566
A_55_P2168643	Khk	-4.90714	0.000135154		A_55_P2110522	Olfr763	-2.00658	0.00215054		A_55_P2086381		-3.44354	0.0132479		A_55_P2040026	Itga4	11.1361	0.0027374
A_55_P2168544	Pik3c2b	2.85322	0.0425546		A_55_P2110502	Zcchc18	-2.15638	0.00192731		A_55_P2086334	Krt85	18.8896	2.85802e-05		A_55_P2040011	Itga7	2.35859	0.00010946
A_55_P2168466	Brox	-2.44903	0.00274725		A_55_P2110497	Ddc	-6.52941	0.00055502		A_55_P2085880	Aco1	-3.76636	0.000284607		A_55_P2039541	Arhgap15	2.85175	0.0126154
A_55_P2168458		4.19346	3.50613e-05		A_55_P2109489	Gm884	-2.41413	0.0127034		A_55_P2085806	BC029214	-5.64149	8.2487e-07		A_55_P2039429	Dio1	-3.98898	0.00240416
A_55_P2168417	Cul2	-2.19317	0.00766181		A_55_P2109382	Adora2a	2.64924	0.00224491		A_55_P2085779	Ifi27l2b	5.10791	0.000245683		A_55_P2039416	Sgk1	3.78553	0.0226901
A_55_P2168281		-2.42031	0.00013373		A_55_P2109099		-3.77168	0.00735763		A_55_P2085776	Ifi27l2b	2.58871	0.000407328		A_55_P2039354		-2.17101	0.00559716
A_55_P2168178	Olfr1226	-2.57211	7.58733e-05		A_55_P2108933	Dao	-2.04141	0.00341987		A_55_P2085771	Pcnxl2	2.8516	0.0123437		A_55_P2039196	Gfra4	-2.14683	0.0123385
A_55_P2168014	Prmt7	-2.03672	0.0362636		A_55_P2108708	Kcne3	2.01137	0.0276408		A_55_P2085574	Nfix	-2.97047	0.00364356		A_55_P2039044	Cyp3a59	-4.70059	0.022712
A_55_P2167984	Mmd	-2.57443	1.15511e-05		A_55_P2108678		2.06335	0.00300989		A_55_P2085518		-2.92287	0.0389327		A_55_P2038987	Gas7	-2.29468	0.00206622
A_55_P2167898	Nat9	-2.56626	0.00244353		A_55_P2108609	Srgap3	-3.38855	0.0237412		A_55_P2084910	Zfp385b	-3.08062	0.00689288		A_55_P2038854	Gareml	-2.23158	0.025341
A_55_P2167893	Hs3st3b1	2.89789	0.00368828		A_55_P2108554		-2.68596	0.00620675		A_55_P2084611	B4galt6	5.73388	0.0152369		A_55_P2038770	Fam49a	2.31708	0.0185778
A_55_P2167840	Gm14151	-3.38919	0.00576473		A_55_P2108271	Ephb6	3.21002	0.000767922		A_55_P2084601		5.65911	0.0019034		A_55_P2038767	Fam49a	2.32343	0.00663408
A_55_P2167833	4930431F10Rik	-2.00792	0.0121237		A_55_P2108151	Beta-s	-2.24124	0.00212925		A_55_P2084002	Aptx	-3.06978	0.00113834		A_55_P2038540	Hbb-b2	-2.0642	0.0282873
A_55_P2167776		3.06369	0.000181317		A_55_P2108143		-2.77134	0.0169216		A_55_P2083879	Vsig2	3.18064	0.0234783		A_55_P2038514		-3.23283	0.0185328
A_55_P2167728	Gm10451	2.68672	0.00015774		A_55_P2108094		-6.79328	0.00392551		A_55_P2083629	Tle2	-2.27379	0.0460496		A_55_P2038452		3.00471	0.000364828
A_55_P2167585	Ube2cbp	-2.88908	4.73295e-05		A_55_P2108081	LOC101055831	-2.91676	0.0119565		A_55_P2083609	Dkk3	2.31319	0.0221154		A_55_P2038362	Acot5	-5.08656	0.000302633
A_55_P2167525	Scube3	-2.52876	0.0488854		A_55_P2107785		2.88751	0.0207422		A_55_P2083481	Lpin1	3.07079	0.0212841		A_55_P2038358	Acot1	-7.44265	0.00903891
A_55_P2167521		2.28304	0.0177006		A_55_P2107775	Apol9a	3.68879	0.00817037		A_55_P2083474	Lpin1	2.82625	0.0233203		A_55_P2038262	Phf11b	4.93289	0.00539574
A_55_P2167501	Acsf2	-2.48742	0.00346069		A_55_P2107765	Col28a1	-2.06773	0.00321058		A_55_P2083411	Cyp4f18	3.65195	0.00168661		A_55_P2038101	Dock11	5.36859	0.000669605
A_55_P2167406	Zfp944	2.23408	0.0300209		A_55_P2107528		-2.25676	0.0223595		A_55_P2083252	Mtus2	5.09988	0.0321643		A_55_P2037797	1700019O17Rik	-2.04581	0.00255628
A_55_P2167274	Pcsk5	3.12599	0.0041051		A_55_P2107489		-2.18196	0.0027647		A_55_P2083233		-3.93567	0.0274527		A_55_P2037787		-3.44649	0.00518487
A_55_P2167269	Pcsk4	-2.64872	0.0142359		A_55_P2107247	Tssk5	2.10476	0.00207064		A_55_P2083121	Vill	13.0028	0.000322473		A_55_P2037697	Gm9733	7.22285	0.00104597
A_55_P2167240	Atp1b4	-2.3733	0.00017808		A_55_P2107223	Sult2a6	410.143	7.9977e-05		A_55_P2082929	H2-Ob	-4.58213	0.00195862		A_55_P2037608	Acp5	-2.07513	0.00432658
A_55_P2167160	Hdhd2	-2.36132	0.000461533		A_55_P2107207	Gpr137b-ps	2.49383	0.00281011		A_55_P2082914	Acly	-2.0812	0.00840788		A_55_P2036898	Gm15292	3.57172	0.000225584
A_55_P2167035	Zfand1	-2.88546	0.000100654		A_55_P2107192		2.22568	0.0358721		A_55_P2082880		6.3568	0.0178725		A_55_P2036883	Hist2h2bb	3.20805	0.00230308
A_55_P2166985	Dedd2	-2.00662	0.00298594		A_55_P2107065	Mcm8	-3.97709	0.00198343		A_55_P2082841		-2.50489	0.0164159		A_55_P2036813	Hist3h2ba	3.56658	0.0230548
A_55_P2166873		-2.56117	5.54042e-05		A_55_P2106926	Kcna3	3.24676	0.0132373		A_55_P2082837	Spin1	2.37538	0.00234288		A_55_P2036723	Stk36	2.34324	0.0214468
A_55_P2166858		-2.92216	4.77839e-05		A_55_P2106891	Kcna5	2.51608	0.0364185		A_55_P2082733	Cybb	6.03196	0.00437252		A_55_P2036567	Vav1	5.02358	0.00161253
A_55_P2166809		2.31268	0.000440815		A_55_P2106700	Vmn2r59	-2.13555	0.0177885		A_55_P2082625		-2.38983	0.0123896		A_55_P2036303	Bdnf	-2.10422	0.0321634
A_55_P2166758	Gpx5	-2.63133	0.00381238		A_55_P2106608		3.34796	0.000180994		A_55_P2082614	Zfp791	2.46568	0.0443191		A_55_P2036280	Psen2	-2.31457	0.0374074
A_55_P2166743	1700011J10Rik	-2.10075	0.0203681		A_55_P2106544	Olfr1264	-2.35593	0.000955604		A_55_P2082434	Btbd11	6.81012	0.00416592		A_55_P2036240		2.16084	0.0197158
A_55_P2166555	Gm5637	2.36837	0.000110717		A_55_P2106469	4930565B19Rik	2.71785	0.0386195		A_55_P2081571	Raver1	-2.47009	0.00328232		A_55_P2036220	Chadl	-2.16689	0.00293848
A_55_P2166501	Cd44	8.6142	0.000319861		A_55_P2106358		2.08798	0.0195008		A_55_P2081530	Sh3bgrl3	3.59154	0.00117636		A_55_P2036180	Mcf2l	6.94168	0.00602113
A_55_P2166488	Cd44	2.85213	0.00141271		A_55_P2106270		6.10881	0.00149335		A_55_P2081488	Pglyrp1	30.2267	0.000338168		A_55_P2036022	Gm10615	2.98442	0.0027434
A_55_P2166414	Uqcr10	-2.17846	0.000673131		A_55_P2106241	4930432K21Rik	-8.76522	0.000185433		A_55_P2081323	Gnas	2.75986	0.0243102		A_55_P2035963	Hipk3	2.24663	0.0161469
A_55_P2166326		4.39133	0.013903		A_55_P2106190	Vmn1r175	-5.86129	0.0294207		A_55_P2081164	Cd300lf	53.4003	0.00327434		A_55_P2035932	Fgf7	-2.225	0.0286122
A_55_P2166020	Ifna13	2.07995	0.0269143		A_55_P2106068	Myh2	-6.33591	0.0100683		A_55_P2081105	AI607873	10.3523	0.000209557		A_55_P2035804	Fzd8	-2.19528	0.0026041
A_55_P2165929	Olfr3	-2.67743	4.51845e-05		A_55_P2106039	Map3k6	2.63987	0.0124299		A_55_P2080947		-2.56178	0.0150412		A_55_P2035757	Gm8884	6.36541	0.0333474
A_55_P2165869	Cebpb	2.17226	0.0153827		A_55_P2105685	Adrb3	-2.12875	0.00745503		A_55_P2080774	Qdpr	-2.68383	1.09838e-06		A_55_P2035653	Ccdc123	-2.22743	0.017981
A_55_P2165839	Cebpe	-7.11547	0.000339459		A_55_P2105643	Mmp1b	-2.38129	0.00200941		A_55_P2080562	Arhgap26	3.63406	0.0421521		A_55_P2035623	Zfp473	3.7487	0.0180573
A_55_P2165790	Siglech	-3.30887	0.0127207		A_55_P2105632	BC024139	-2.21815	0.0412887		A_55_P2080248	Cyp2j8	-2.96431	0.000161035		A_55_P2035539	D3Ertd751e	-2.06248	0.00803004
A_55_P2165695	Gm11546	-2.76383	4.67021e-05		A_55_P2105517		3.32462	0.00859216		A_55_P2080021	Papss2	-3.3545	0.000643982		A_55_P2035509	Pyhin1	5.06611	0.0153582
A_55_P2165579	Gm10779	-3.38363	0.0279364		A_55_P2105452	Foxp1	-2.00037	0.00760448		A_55_P2079912		-2.05219	0.000416207		A_55_P2035424	Hpgd	-2.21031	0.00413195
A_55_P2165554		4.05646	0.0170614		A_55_P2105371	Dlk1	-2.21363	0.00145822		A_55_P2079619	Rnf43	-3.03015	0.000266592		A_55_P2035320	Nfil3	2.17452	0.0211916
A_55_P2165401		5.01118	9.62682e-05		A_55_P2105220	Hscb	-2.21932	0.000366995		A_55_P2079579	Pira7	6.10606	0.000764079		A_55_P2035315	Rasgef1b	3.23559	0.0359341
A_55_P2165293	Atrn	-2.87334	0.00304941		A_55_P2105181	Bhmt	-4.16602	0.013177		A_55_P2079561	Lilra6	3.47471	0.00190583		A_55_P2035018	Clec4n	4.65808	0.00105582
A_55_P2165249	Papln	2.26845	0.00352248		A_55_P2105180	Bhmt	-2.74888	0.0236703		A_55_P2079560	Lilra6	4.94407	0.00199865		A_55_P2034663	Csf2rb2	3.35041	0.0341312
A_55_P2165118	Gm20865	-2.41247	0.000712496		A_55_P2104975	Serpina3f	8.7142	0.0187747		A_55_P2079167	Dnm1	-3.73651	0.00672575		A_55_P2034655		40.6862	0.000650215
A_55_P2165091	Acnat2	3.70009	0.000252061		A_55_P2104440		-2.61176	0.00265923		A_55_P2079142	Fam124b	2.34423	0.0134467		A_55_P2034453		-2.03803	0.00738932
A_55_P2164977	Tcf24	4.73801	0.00086172		A_55_P2104387		2.26677	0.00936809		A_55_P2078955	Aqp8	-56.5941	0.00421976		A_55_P2034300	Tmem40	3.12778	0.000681309
A_55_P2164764	Olfr965	-2.29927	0.0330442		A_55_P2104372	Gm12302	-2.5988	0.00906303		A_55_P2078735	AI662270	2.58099	0.0310853		A_55_P2034227		2.9313	0.00368035
A_55_P2164744	Muc20	-2.23302	0.0301377		A_55_P2104312	Olfr66	-2.08114	0.00228268		A_55_P2078611		2.18786	0.00385894		A_55_P2034110	Tgm2	2.03297	0.0142514
A_55_P2164714	C7	-2.64895	0.00265573		A_55_P2103969	Bhmt	-2.50986	0.0117581		A_55_P2078433	Mcoln2	9.71992	0.00323816		A_55_P2034067	Myom3	2.51316	0.0363919
A_55_P2164609	Gm960	-5.75758	0.0311637		A_55_P2103963	Bhmt	-5.63161	0.00975957		A_55_P2078403	Rgs19	3.41859	0.00965607		A_55_P2034032	Il12rb1	3.84358	0.000928057
A_55_P2164608	Gm5724	-3.95402	0.00998099		A_55_P2103937	Gm10362	2.53969	0.0039944		A_55_P2078285	Uck1	-2.46251	7.61656e-05		A_55_P2034027	Nos3	2.14566	0.000610809
A_55_P2164524	Zfp872	3.22236	0.0392071		A_55_P2103846		-4.98174	0.00173363		A_55_P2078088	Pqlc1	-2.4992	0.000733607		A_55_P2033922	Tsga8	-2.31114	0.0162293
A_55_P2164503		-3.12389	0.00323564		A_55_P2103811		-3.00634	0.0463934		A_55_P2077994	Ube2v2	3.20045	0.00368496		A_55_P2033767	Esrp1	-2.87783	0.0102561
A_55_P2164443		-2.2837	0.000722951		A_55_P2103766	D630003M21Rik	-2.54614	0.0144377		A_55_P2077920	Naaladl2	-2.17622	0.00446363		A_55_P2033720	Olfr331	2.01923	0.00338262
A_55_P2164172	Rs1	-4.07514	0.0211188		A_55_P2103698	Isg15	2.65645	0.021236		A_55_P2077914	Tpgs2	-2.04189	0.0110589		A_55_P2033500	Ltbp4	-2.07253	0.000912363
A_55_P2164075	Gm10804	-117.978	5.73092e-05		A_55_P2103661	Zfp366	2.92149	0.000667921		A_55_P2077635		-2.03524	0.00199301		A_55_P2033326		-5.53028	0.033593
A_55_P2164070	Grip1	-2.34075	0.000122395		A_55_P2103561	Prdx6	-2.03956	0.00627207		A_55_P2077555	C330021F23Rik	-2.30747	0.000576668		A_55_P2033055	Pdp1	2.88899	0.00920891
A_55_P2163873	Uox	-6.10819	9.95258e-05		A_55_P2103491	Fam170b	2.02033	0.0047523		A_55_P2077546		3.55442	0.00571373		A_55_P2033041	Sirpb1b	12.258	0.00133567
A_55_P2163812	42982	-2.91919	0.00107921		A_55_P2103452	Npy1r	2.95637	0.00132972		A_55_P2077501		-2.31577	0.0108572		A_55_P2032946	Gm3776	-66.7955	0.00735979
A_55_P2163774	Crip1	2.36772	0.0082015		A_55_P2103432	Gm9876	2.1637	0.00358665		A_55_P2077497		-2.06714	0.0301223		A_55_P2032853	Entpd1	2.24494	0.0123862
A_55_P2163749		2.74963	0.0319725		A_55_P2103402		-2.91921	0.0314189		A_55_P2077368	Dpep2	4.72023	0.00134127		A_55_P2032815	Rnase13	4.64043	0.0133271
A_55_P2163744	Jph1	-2.36013	0.000185422		A_55_P2103206	Dusp8	3.09287	0.0142027		A_55_P2077228	Cenpl	-2.14789	0.00667128		A_55_P2032775		21.1203	0.000421029
A_55_P2163725	Slc7a9	-3.39352	0.01768		A_55_P2103190		2.49077	0.0127834		A_55_P2077053	Itih4	6.1017	0.00239096		A_55_P2032718	Klra9	3.11555	0.00240415
A_55_P2163561	Sytl1	-2.49794	0.00448354		A_55_P2103132	Pou3f2	-2.1545	0.00296328		A_55_P2076998	Csn1s2b	3.05991	0.0231728		A_55_P2032478	Sfxn5	-2.58054	0.0185735
A_55_P2163398	Olfr611	2.6754	0.0158892		A_55_P2103097	Ccr8	12.907	0.00445469		A_55_P2076861	Sema6d	2.48286	0.0289078		A_55_P2032440	Gm8378	12.5329	0.00728731
A_55_P2163353	Sox3	-2.624	7.77711e-05		A_55_P2102798	Prl7a2	-2.31577	0.00119801		A_55_P2076772	Hspa5	2.27508	5.45822e-06		A_55_P2032419	LOC101056207	2.89393	0.0217933
A_55_P2163344		-2.20792	4.71724e-06		A_55_P2102788		-2.36816	0.000638827		A_55_P2076538	Whamm	-2.69191	0.0257968		A_55_P2031898		-2.41893	0.00294501
A_55_P2163263		4.12357	0.000743127		A_55_P2102683		4.01408	0.0206939		A_55_P2076524	1700028I16Rik	-2.09902	0.00113182		A_55_P2031692	Gstm6	-4.4514	0.0106378
A_55_P2163148	LOC631360	-2.61317	6.03588e-05		A_55_P2102624	Eaf2	-2.19793	0.0291387		A_55_P2076448	Tmem255a	2.00321	0.0287766		A_55_P2031681	Gstm6	-4.0078	0.00916725
A_55_P2163098	Akr1c18	-2.11518	0.00521455		A_55_P2102563	Olfr1026	-2.04462	0.00253439		A_55_P2076303	42802	-2.04545	0.00170453		A_55_P2031676	Gstm6	-4.5604	0.0043344
A_55_P2163093	Nxf7	-2.90189	2.0124e-05		A_55_P2102365	Spag7	-2.0331	0.0244226		A_55_P2075769	Ube2n	-2.16453	0.00132444		A_55_P2031671	Gstm6	-3.60673	0.00878855
A_55_P2163028	Ier2	-2.15729	0.000229775		A_55_P2102350	Stambpl1	3.46461	0.000467301		A_55_P2075734		-2.19385	0.013194		A_55_P2031668	Gstp1	-5.49175	0.000243635
A_55_P2162970		-5.21022	0.00047783		A_55_P2102060	Gstm3	-3.08612	0.0205552		A_55_P2075731		-2.10805	0.0107572		A_55_P2031403	2210404O07Rik	2.94781	0.00541826
A_55_P2162910	Rtn1	2.38963	3.68238e-05		A_55_P2102027		2.58856	0.00330872		A_55_P2075657	5330426L24Rik	-2.13264	0.0374686		A_55_P2031288	Abcg5	-2.9732	0.00407546
A_55_P2162880	Cyp3a57	-5.20558	0.00341413		A_55_P2101956		2.61445	0.00670472		A_55_P2075424	Ttll7	2.70156	0.0152064		A_55_P2031167	Efna1	2.8942	0.00907909
A_55_P2162815	Fbxo31	3.14056	0.00065616		A_55_P2101915	Rpl18a	-2.08208	0.0028997		A_55_P2075263	Acnat2	9.66271	1.35217e-05		A_55_P2030938	Trim59	2.25091	0.0291267
A_55_P2162797		8.22275	0.000320251		A_55_P2101671	Olfr1276	-2.0432	0.00312698		A_55_P2075230	BC051226	-2.24412	0.00274007		A_55_P2030883	Esr1	2.96279	0.00169055
A_55_P2162678	Dnajc10	2.13404	0.00220252		A_55_P2101546	Olfr328	-3.0646	0.00548274		A_55_P2075200	Tor3a	4.38022	0.00339242		A_55_P2030299		3.41285	0.0117564
A_55_P2162617		-3.4894	0.00354966		A_55_P2101355		-2.37794	0.000846649		A_55_P2075127	Pax2	-34.1195	0.00172394		A_55_P2030269	Dnahc6	-2.08058	0.0221811
A_55_P2162543		4.0497	0.00534162		A_55_P2101286		-2.46462	0.00110563		A_55_P2075090	Gm7257	-2.23519	0.0158197		A_55_P2030229	Fan1	2.56092	0.033692
A_55_P2162537	Ing4	2.09033	0.00604379		A_55_P2101231	Aldh7a1	-3.7786	0.0313633		A_55_P2074927	Gm7932	4.86506	0.0116989		A_55_P2030194	Ifna5	-2.67996	0.0371401
A_55_P2162394	Pdp1	5.58492	5.15899e-05		A_55_P2101088	Slc5a11	3.23403	0.0320475		A_55_P2074762	Lect2	-3.46417	0.00653906		A_55_P2030183		-2.24576	0.0338364
A_55_P2162269	Bri3	-2.8826	0.00018964		A_55_P2101055	Alpk1	33.0375	0.0110545		A_55_P2074703	Gm581	-2.14803	0.0102486		A_55_P2030046	Barx2	-2.76148	0.00411862
A_55_P2162175	Ccdc149	2.72338	0.02298		A_55_P2101031	Dnahc10	-2.09859	0.00212179		A_55_P2074636	Adap1	3.23541	0.000651215		A_55_P2029892	E030019B06Rik	-2.7767	0.0371867
A_55_P2162002	Pkhd1	-2.05842	0.00108099		A_55_P2100997	Wibg	-2.2821	0.0420869		A_55_P2074499	Kcp	-2.59637	0.000768114		A_55_P2029682	Fry	2.12642	0.0376365
A_55_P2161964	AU017193	2.41332	0.044171		A_55_P2100968	Dnahc7b	-2.73872	0.0314277		A_55_P2074035	Haao	-3.42886	0.000174231		A_55_P2029678	Etfa	-2.0302	0.000945567
A_55_P2161858	Pdlim7	4.33484	0.00385203		A_55_P2100273	Defb30	-3.31873	0.0134151		A_55_P2073248	Slc25a34	2.8555	0.0150835		A_55_P2029574	Por	2.22422	6.75614e-06
A_55_P2161824	Arr3	4.33743	0.0017662		A_55_P2100222	Gm4425	2.72131	0.0262694		A_55_P2073205	LOC101056044	-2.05628	0.0425442		A_55_P2029558	Adrb2	6.11046	0.0128542
A_55_P2161690	Tomm40	-2.59811	0.000229379		A_55_P2100155	Mapt	-3.18002	0.0142574		A_55_P2072908		3.37313	0.0020333		A_55_P2029533	Zfp57	-2.89348	0.0059632
A_55_P2161675	Zfp133-ps	-2.9001	0.0029137		A_55_P2099890	Atxn7	-3.08336	0.0149679		A_55_P2072906		3.41422	0.00112387		A_55_P2029420	2610318N02Rik	4.86961	0.0048241
A_55_P2161640	Slc38a1	4.50646	0.00464136		A_55_P2099881	Gm10461	-2.05888	0.032061		A_55_P2072801	Lypd5	2.07096	0.00169849		A_55_P2029366	Abhd6	-2.20289	0.00607482
A_55_P2161595	Hpca	3.36931	0.0193942		A_55_P2099742	Ccl19	4.44787	0.00219366		A_55_P2072666	Cyp2d37-ps	-3.42598	0.0068647		A_55_P2029101	Lcorl	-2.26309	0.0431844
A_55_P2161585	Coq10a	-2.3692	6.43132e-05		A_55_P2099665	Gpr37	-2.49624	0.0263466		A_55_P2072656	Ckmt1	2.9458	0.00139026		A_55_P2029051	Fgd3	2.77671	0.000158881
A_55_P2161465	Gm10516	-2.44864	0.0190454		A_55_P2099594	Scd3	-3.02162	0.00434944		A_55_P2072373	Msn	2.23129	0.000743446		A_55_P2029046	Fgd3	2.80289	0.0326033
A_55_P2161423	Hif3a	2.95904	0.00860036		A_55_P2099363	Stac2	-2.77946	0.00643395		A_55_P2072315	Gm10216	-3.96071	0.000798264		A_55_P2028883	Rnft2	-2.21695	0.00272705
A_55_P2161395		2.10365	0.0381442		A_55_P2099279	Tmem29	-3.82305	0.0249822		A_55_P2072141	Chic1	-2.63462	0.0186739		A_55_P2028798	Nqo2	-2.86866	0.0313484
A_55_P2161347	Acmsd	-2.40509	0.0110542		A_55_P2099014		-2.91003	0.0205585		A_55_P2071952	Wdr92	6.46325	0.000249005		A_55_P2028773	Slc22a17	2.54712	0.00361056
A_55_P2161337	Pkib	-2.75772	6.66666e-05		A_55_P2098985	C87414	-3.17296	0.00872315		A_55_P2071940	Mrgprb1	3.02305	0.0222828		A_55_P2028595	AW551984	2.19764	0.0443973
A_55_P2161287		-3.7551	0.0346175		A_55_P2098941	1700110I01Rik	-2.06861	0.0208015		A_55_P2071858	Mgmt	-2.10083	0.00236758		A_55_P2028504	LOC100862497	-2.20171	0.0297565
A_55_P2161232	6720489N17Rik	2.37695	9.58662e-05		A_55_P2098865	Asic5	-2.33977	0.0164582		A_55_P2071731	Olfr75-ps1	-2.01726	0.0382339		A_55_P2028268	Pik3cd	8.87475	0.00635101
A_55_P2161055	Trp63	7.09994	0.000188549		A_55_P2098791		-6.82492	0.000782339		A_55_P2071601	Ppara	-3.10802	0.0101074		A_55_P2028263	Pik3cd	3.75358	0.00965745
A_55_P2160871	Vmn2r90	2.74428	0.00459732		A_55_P2098609	Spag16	-2.05702	0.00118677		A_55_P2071596	Ppara	-2.81332	0.0176865		A_55_P2028214		-2.14601	0.0281913
A_55_P2160750	Col25a1	-4.04176	0.0110692		A_55_P2098598	Btg1	-2.81057	6.00327e-05		A_55_P2071581	Gm7710	2.47039	0.00630191		A_55_P2028054	Incenp	2.08575	0.00623572
A_55_P2160716	Arf5	-2.13119	0.00264494		A_55_P2098593	LOC101055656	2.45663	0.0226568		A_55_P2071536		2.31684	0.00475653		A_55_P2028046	Cyp3a59	-5.20975	0.0113556
A_55_P2160686	Tsc22d1	-5.2256	7.14517e-06		A_55_P2098499	Gnpda2	-2.04106	0.00933216		A_55_P2071526	Papln	4.54629	0.011023		A_55_P2028029	Abcb11	-2.51165	0.0329717
A_55_P2160663		-2.64235	7.72323e-05		A_55_P2098076	Trim25	-2.82073	0.0146764		A_55_P2071466	Ncf1	3.79499	0.0115977		A_55_P2027999	Hk1	2.25879	0.00067526
A_55_P2160623	Kalrn	2.99117	0.0166192		A_55_P2097998	1500017E21Rik	-2.06902	0.00238152		A_55_P2071441	Kcnip1	3.6586	0.0248062		A_55_P2027979	Impg2	-2.85113	0.00231512
A_55_P2160456	Defb40	-2.715	4.68593e-05		A_55_P2097989	Zc3h4	-2.03328	0.045346		A_55_P2071132	Tnfrsf23	4.55785	0.015199		A_55_P2027698	Ndufa5	-2.04802	0.000747122
A_55_P2160296	Olfm1	-2.50368	0.00197038		A_55_P2097967		-2.24548	0.00221186		A_55_P2071028	Gm6195	-2.76332	0.000254853		A_55_P2027653	Arhgap25	2.86419	0.000757049
A_55_P2160128	Pls1	-2.07782	0.0378548		A_55_P2097814	Olfr122	-2.89651	0.043391		A_55_P2070977		-2.37347	0.0425736		A_55_P2027337		-3.02369	0.00193426
A_55_P2160094	Plscr2	-3.87924	0.000507317		A_55_P2097808	P4ha1	2.29545	0.0340672		A_55_P2070976		-4.40024	0.00497424		A_55_P2026898		-3.0459	0.00859998
A_55_P2160032	Atp5f1	-2.43779	0.0004722		A_55_P2097665	Arl4a	-2.33563	0.0376979		A_55_P2070938		-2.84148	0.00170377		A_55_P2026632	Pilrb1	2.09581	0.0240603
A_55_P2159934	Rnf186	-4.03792	0.0213796		A_55_P2097508	Mcc	-2.1129	0.000847722		A_55_P2070869	Lcn2	166.341	0.00540482		A_55_P2026487	Stab2	2.09684	0.00028478
A_55_P2159895	Zfp52	2.9437	0.00542075		A_55_P2097474	Creb5	-2.12971	0.0298027		A_55_P2070766		-2.20211	0.0138614		A_55_P2026340	Fmo5	-2.13519	0.0115888
A_55_P2159830	Yaf2	-2.47436	5.1571e-05		A_55_P2097434	Strm	-26.875	0.00013767		A_55_P2070603	Cxxc4	-2.46895	0.0374213		A_55_P2026295	Syne1	-3.18507	0.0135958
A_55_P2159825		-4.32099	0.00641232		A_55_P2097398		2.23003	0.0277299		A_55_P2070401	4930402H24Rik	-2.52683	0.00562534		A_55_P2026258		5.0458	0.0118657
A_55_P2159807	Rfc4	-2.43662	0.000298208		A_55_P2097372	Tctex1d4	-2.48706	0.00608205		A_55_P2070262		3.63337	0.00929262		A_55_P2026139	Nxpe5	7.37183	0.00146387
A_55_P2159715	Gm6818	-8.23345	0.0206214		A_55_P2097279	Lilrb3	3.21297	0.0239325		A_55_P2070069	Itpkb	2.76962	0.047064		A_55_P2026025		-2.14393	0.00209768
A_55_P2159685	Kcnj3	-2.22685	0.0380124		A_55_P2097206	Camk4	-3.00518	0.0193627		A_55_P2069969	Gm10639	-47.5041	0.0301084		A_55_P2025937		5.47127	0.00273951
A_55_P2159595		3.08643	0.00568382		A_55_P2097176	Idua	2.65931	0.0120879		A_55_P2069768	Kiss1	3.46542	0.0374273		A_55_P2025829		2.79517	0.00216677
A_55_P2159575	Reep6	-2.67452	0.00225699		A_55_P2097161	Ifitm7	-2.80522	0.0208109		A_55_P2069765	Kiss1	3.07044	0.0286927		A_55_P2025765	Adam8	4.86125	0.0100035
A_55_P2159573	Reep6	-4.51563	0.00178335		A_55_P2097072		2.13137	0.0188547		A_55_P2069485	Ptpn13	2.40363	0.0154614		A_55_P2025755	Syce1l	2.36055	0.0167818
A_55_P2159555	Adamts4	15.7828	0.00035897		A_55_P2096917	Mreg	-2.88401	0.00643666		A_55_P2069083	Galnt12	2.25597	0.0374292		A_55_P2025746	Adam5	-2.00996	0.00342103
A_55_P2159506	Gm5458	-2.11263	0.0152766		A_55_P2096883	Steap3	-3.01924	0.0011335		A_55_P2068877		2.57438	0.00173581		A_55_P2025730	Hif3a	3.56374	0.000729741
A_55_P2159485		6.52971	0.00154716		A_55_P2096827	Art3	-2.08231	0.0104489		A_55_P2068812		2.27298	0.0045777		A_55_P2025687	Muc4	5.08712	0.00402387
A_55_P2159405		-2.19357	0.000974415		A_55_P2096699	Calcoco2	2.51633	0.0316539		A_55_P2068734	Ccl27a	-3.29948	0.000146688		A_55_P2025655		-3.18636	0.0105973
A_55_P2159309	Synpo2	2.69473	0.000683255		A_55_P2096674	Ranbp3l	-2.25536	0.00128328		A_55_P2068723	Ccl27a	-3.55862	0.000191983		A_55_P2025523	Arhgap6	-2.74288	0.0153441
A_55_P2159264	Lifr	-2.66764	0.020403		A_55_P2096515		-2.74936	0.0141446		A_55_P2068471	Spaca4	-2.29817	0.0155953		A_55_P2025490	Tnfrsf18	4.9668	0.000672254
A_55_P2159189	Decr1	-2.07919	0.000764853		A_55_P2096422	Inhbb	4.27627	0.00721616		A_55_P2068350	Ido2	-2.61052	0.000456809		A_55_P2025454	Ttc12	-2.56645	0.00493691
A_55_P2159094	Lepre1	2.26771	0.00434995		A_55_P2096405	Cdc42bpa	2.13482	0.00856377		A_55_P2068265	Mif	-2.41922	0.000746947		A_55_P2025343	Mup21	-10.0631	0.0156788
A_55_P2159045	Fads6	-2.65863	0.00332171		A_55_P2096375	Dydc2	-2.59611	0.0233964		A_55_P2068248		-2.12367	0.0100699		A_55_P2025340	Olfr1276	-2.20376	0.0432713
A_55_P2159026	Rpl22l1	-2.43728	0.00428835		A_55_P2096310		-5.29916	4.07893e-05		A_55_P2068247		-2.03711	0.0147155		A_55_P2025123	Proca1	-2.21693	0.022552
A_55_P2158962	Dixdc1	-2.58308	0.0110063		A_55_P2096231	Cga	-2.09899	0.00299543		A_55_P2067712		-2.48182	0.00435564		A_55_P2025078	Csf1r	4.00694	0.000253213
A_55_P2158873	Ppid	-2.10408	0.0031052		A_55_P2096134		-4.64368	0.00417136		A_55_P2067707	Mep1a	3.96262	0.0414209		A_55_P2025006	Klk1b26	-4.1095	0.00764662
A_55_P2158866	Nme6	2.25097	0.00486628		A_55_P2095899	2310057B04Rik	-3.43622	0.0224288		A_55_P2067608	Clmp	2.82149	0.00218753		A_55_P2024888	Ctss	5.24832	0.000982644
A_55_P2158592	Sirpb1a	14.26	0.000429271		A_55_P2095794	Evi5	-2.18752	0.000442444		A_55_P2067583	Cd68	2.9416	0.0286846		A_55_P2024841	Gstt1	-5.37066	0.008481
A_55_P2158547	Cyp2c54	-7.66296	0.00135328		A_55_P2095784	Gemin6	-2.26454	0.00194919		A_55_P2067505	Slc16a3	5.43004	0.000931173		A_55_P2024763	Lama3	-2.14284	0.0088212
A_55_P2158498	Btk	3.01344	0.000489618		A_55_P2095754	Mrgpra5	-2.1389	0.0028599		A_55_P2067473	Gm14015	2.54973	0.00923309		A_55_P2024679	Gm10765	-3.82309	0.00044398
A_55_P2158458	Iqcc	-2.48827	0.00058639		A_55_P2095503		-2.11919	0.00298992		A_55_P2067445	Arf5	-2.41291	0.00321848		A_55_P2024625	Gm1987	2.06911	0.0348997
A_55_P2158227	Angpt1	-3.70499	0.0083121		A_55_P2095325	AI182371	-2.89399	0.00557701		A_55_P2067366	Zfp827	3.24259	0.0020664		A_55_P2024366	Raver2	4.36583	0.00115297
A_55_P2158018	Rnf39	-2.15096	0.000240076		A_55_P2095301		2.06869	0.0394507		A_55_P2067362	Dpep2	33.5745	0.000230783		A_55_P2024290	Fam149a	-3.2425	0.0163455
A_55_P2157992		-2.02394	0.000283359		A_55_P2095251	Ell3	-4.25013	0.0354453		A_55_P2067301	8430406I07Rik	-2.86309	0.0201138		A_55_P2024145	Vmn1r62	-2.62163	0.00306575
A_55_P2157952	Gm10755	2.30513	0.0492107		A_55_P2095181	Fdxacb1	-3.55371	0.0049806		A_55_P2067266	LOC101056395	-2.30367	0.00467893		A_55_P2024054	Slc16a5	3.07844	0.0232736
A_55_P2157922	Ndufaf1	-2.37138	3.16105e-05		A_55_P2094931		-2.41967	0.000679126		A_55_P2067041		-3.21097	0.00042624		A_55_P2024046	Slc16a5	3.49408	0.0062055
A_55_P2157897	Igsf10	-2.97701	0.0148919		A_55_P2094796	Olfr62	-2.1374	0.00155244		A_55_P2067011	Agxt2l2	2.02482	0.0464352		A_55_P2023912		9.25442	0.00266076
A_55_P2157814	Gmds	3.04586	0.0165837		A_55_P2094792	Pcdhga10	-2.24383	0.00132046		A_55_P2066778	AB124611	8.71483	0.00282713		A_55_P2023692	Neurl1a	2.25702	0.0112058
A_55_P2157730	Gpr158	-5.81506	0.0384786		A_55_P2094721	Sox11	-2.60128	0.0163303		A_55_P2066727	Serpinb6a	2.58995	0.0299046		A_55_P2023637	Prg4	6.89193	0.000511412
A_55_P2157705	Uqcr10	-2.27562	0.000173119		A_55_P2094445	Ms4a10	-2.40727	0.000754467		A_55_P2066593	Oprl1	-2.06113	0.00709379		A_55_P2023607	Ikzf1	6.51173	0.0116975
A_55_P2157676	Wdr34	-2.05749	0.000274335		A_55_P2094272	Gm9694	-2.56936	0.00477107		A_55_P2066578	Ifi204	4.30904	0.000421904		A_55_P2023572	Txn2	2.21327	0.00423824
A_55_P2157620	Gm10734	2.94724	0.000227801		A_55_P2094044	Gm15800	-2.4583	0.000918604		A_55_P2066548	Baiap2l2	-3.53486	0.00150005		A_55_P2023523	Aloxe3	4.21152	0.0041626
A_55_P2157532		2.34357	0.0280994		A_55_P2093862		4.21187	0.00969912		A_55_P2066543	Orai2	3.89262	0.00147942		A_55_P2023352		-2.16304	0.0149411
A_55_P2157517	Fam20c	-2.6587	0.00205882		A_55_P2093774	Chl1	-2.38242	0.00083619		A_55_P2066230	Hck	5.18585	0.0042429		A_55_P2023200	Miox	6.04206	0.00947802
A_55_P2157384	Xlr5b	-2.481	0.00191193		A_55_P2093705	Meig1	-5.84774	0.0342021		A_55_P2066219	Gm3455	16.6326	9.59142e-05		A_55_P2023191	Polg2	-2.3907	0.00684713
A_55_P2157370	Gm5741	2.20524	0.00376306		A_55_P2093704	Meig1	-10.4952	0.00997681		A_55_P2066081	Prmt6	2.68028	0.00272124		A_55_P2023001	Slc47a1	-2.14576	0.000930689
A_55_P2157335	Rspry1	2.05913	0.00745204		A_55_P2093163	Zbtb14	2.29167	0.00896932		A_55_P2065991	S100a11	4.55976	0.00336527		A_55_P2022585	Pira6	3.66748	0.000451424
A_55_P2157307		3.04782	0.00142808		A_55_P2093023	Xrcc6bp1	-2.46205	0.0386837		A_55_P2065929		-3.18365	0.00169101		A_55_P2022519	Tmem108	3.21406	0.0189312
A_55_P2157250	Gfap	2.51473	0.00921021		A_55_P2092993	D330045A20Rik	7.1556	0.00922067		A_55_P2065754	Krtap19-5	-2.23236	0.0293902		A_55_P2022419	D030018L15Rik	6.14684	0.0147802
A_55_P2157245	Gfap	2.37113	0.0484024		A_55_P2092958	Traf2	4.01685	0.0367162		A_55_P2065751	Krtap19-5	-2.30425	0.0326581		A_55_P2022369	Lbh	2.27193	0.0139266
A_55_P2157236		2.78018	0.00485388		A_55_P2092914	Gm10465	-2.06162	0.00332947		A_55_P2065671	Ccnb1	-5.17154	0.00533919		A_55_P2021981	Ctsw	4.05491	0.00443725
A_55_P2157225	Nqo2	-4.54306	5.80172e-06		A_55_P2092717	Trim43b	3.08159	0.00772211		A_55_P2065567	Chac2	-2.264	0.000880208		A_55_P2021923	Fkbp1a	-2.16619	0.00913174
A_55_P2157205	Cdx1	-7.06927	0.000161925		A_55_P2092501	Med1	-3.29014	0.00296268		A_55_P2065529	Stk30	2.61261	0.000188426		A_55_P2021826	Zbtb4	2.22627	0.0236704
A_55_P2157165	Olfr1444	-2.60435	6.05235e-05		A_55_P2092492	Il18r1	-2.39991	0.00311593		A_55_P2065434		-3.05013	0.0125197		A_55_P2021565	Ntf3	16.3821	0.00493772
A_55_P2157159		-2.74807	7.75433e-05		A_55_P2092219	Serpina9	-5.10187	0.00263872		A_55_P2065394	Brwd1	-2.1208	0.00806755		A_55_P2021490	Gm16386	-2.12953	0.0104881
A_55_P2157019	Phb2	-2.73126	5.32394e-05		A_55_P2091889	2210015D19Rik	2.12128	0.00385939		A_55_P2065231	Gstm3	-7.38916	0.000706436		A_55_P2021266	Hpse	2.18315	0.00723272
A_55_P2157008	Ear10	3.48982	0.0011478		A_55_P2091831	Krtap1-4	2.86801	0.00539792		A_55_P2065169	Gm11578	4.47029	0.0271322		A_55_P2021177	Abca2	-2.20534	0.0322516
A_55_P2156963	Cyp11b1	-2.43736	0.00337647		A_55_P2091736	Rassf2	3.95624	0.00108544		A_55_P2065154	Kdm2b	3.30872	0.0414302		A_55_P2021049	Ugp2	-3.3064	0.00291063
A_55_P2156855	Car13	5.45931	0.000131642		A_55_P2091681	Nudt1	-2.47449	0.00500962		A_55_P2065050		-3.37587	0.00020057		A_55_P2020532	BC089491	4.35645	0.00477108
A_55_P2156796	Pdss2	-2.5108	0.000378966		A_55_P2091651	Vwc2	-2.65455	0.00686954		A_55_P2064976	4930528A17Rik	2.37979	0.0383003		A_55_P2020497	Dcaf12l1	-2.38956	0.00655544
A_55_P2156727	Gm16509	-2.584	0.000235028		A_55_P2091640	2310010M20Rik	-2.10058	0.00190747		A_55_P2064965	Gm10624	-2.8334	0.00533129		A_55_P2020428	Slc22a26	27.6085	0.00227132
A_55_P2156718		-3.38921	0.0141517		A_55_P2091616	Krt222	2.93377	0.0158785		A_55_P2064776	4930412O13Rik	7.62877	0.0062581		A_55_P2020378	Ehd4	2.67703	0.00844726
A_55_P2156712	Gpr1	-2.51418	8.46164e-05		A_55_P2091596	4933407I18Rik	-2.19307	0.0026129		A_55_P2064492	Pcmtd2	-2.24918	0.00201394		A_55_P2019989		-2.88767	0.0351665
A_55_P2156598	Gm9869	-2.2573	8.72222e-05		A_55_P2091561	Olfr139	8.35155	0.00905555		A_55_P2064043	Cd44	3.43171	0.00426275		A_55_P2019719	Oas2	5.32465	0.000851159
A_55_P2156556		-2.75921	0.0166001		A_55_P2091536		-2.42627	0.000721051		A_55_P2063776	Gm2568	-2.37213	0.0439774		A_55_P2019577	1500011B03Rik	2.5763	0.0101206
A_55_P2156515		2.58661	0.000309787		A_55_P2091525		-4.07246	0.0122925		A_55_P2063755	Naip6	3.68786	0.0146957		A_55_P2019557	Mrgpra2b	3.22356	0.0495796
A_55_P2156464	Nt5c3l	2.09567	0.0135783		A_55_P2091359	Padi2	2.80897	0.0285467		A_55_P2063736	Gp49a	4.04741	0.00742731		A_55_P2019447	Ano2	2.04753	0.0343222
A_55_P2156404	Ccdc136	-2.50451	0.000104809		A_55_P2091279	Ublcp1	4.92274	0.00250477		A_55_P2063654	Mup20	-10.1392	0.0236849		A_55_P2019300	Aim1l	-2.13075	0.0192435
A_55_P2156350	Clcn5	2.2092	0.00347607		A_55_P2091274	Sly	-2.17165	0.0116224		A_55_P2063505		-2.18665	0.0219425		A_55_P2019254		-2.14292	0.0400069
A_55_P2156288		-2.97596	0.000513221		A_55_P2091153	BC051142	2.3693	0.017337		A_55_P2063283		3.62275	0.0035877		A_55_P2018934	Emr1	3.03894	0.00534876
A_55_P2156155	Gadl1	-2.46121	0.000110314		A_55_P2091120	Kbtbd12	-6.59569	0.0105413		A_55_P2063257	Lgals4	3.86064	0.00770644		A_55_P2018636	9530077C05Rik	23.2631	0.0142161
A_55_P2156126	Sema6c	-2.64095	0.000477709		A_55_P2091116	Kbtbd12	-4.87067	0.00139095		A_55_P2063256	Lgals4	3.63925	0.0073569		A_55_P2018594		-3.39267	0.0323341
A_55_P2156101	Skp1a	-2.0123	0.000174775		A_55_P2091032		-2.81113	0.0235517		A_55_P2062981	Abca9	2.52645	0.00589329		A_55_P2018457	Hdac7	2.44836	0.00361372
A_55_P2156093		-2.0515	0.00080199		A_55_P2091012	Pea15b	-2.17831	0.00124928		A_55_P2062977	Ppp3cc	2.04644	0.0353965		A_55_P2018417	Osbpl3	2.3952	0.012243
A_55_P2155981	Vmn1r185	-2.52925	9.74687e-05		A_55_P2091005	Emilin3	-3.29473	0.0469997		A_55_P2062911	Epha5	2.55016	0.0400781		A_55_P2018280		-3.27761	0.038325
A_55_P2155869	Klc1	2.16312	0.00512754		A_55_P2090832	Macrod2	-5.51091	0.00105449		A_55_P2062573	C1qtnf3	-2.49897	0.000693539		A_55_P2017914	Csf1	2.21821	0.00443627
A_55_P2155859	Olfr243	-2.72365	4.88046e-05		A_55_P2090782		-2.53454	0.025788		A_55_P2062568	Caprin2	-2.73718	0.00371145		A_55_P2017789	Il4ra	2.09258	0.00155
A_55_P2155853		-3.4919	0.00245259		A_55_P2090617	Pilra	2.42602	0.0416229		A_55_P2062558	Gm10433	3.89192	0.010845		A_55_P2017769	B020031M17Rik	-2.01967	0.0109227
A_55_P2155754	Spink13	-2.40442	0.000134976		A_55_P2090557	Fam211a	11.7349	0.00254223		A_55_P2062543	Kifc1	-3.67925	0.0115762		A_55_P2017759	Evi2a	2.78297	0.0137099
A_55_P2155593		-2.80619	0.000297551		A_55_P2090349	Mettl5	-2.03047	0.00798784		A_55_P2062523	Awat2	-3.27826	0.00181204		A_55_P2017710	Igsf9	-2.3807	0.0267644
A_55_P2155582	Nin	2.5432	0.00144509		A_55_P2090279		2.22734	0.042105		A_55_P2062495	Smyd1	5.09579	7.26365e-05		A_55_P2017699	Lpar5	-3.0291	0.00933285
A_55_P2155572		-2.43968	0.0151674		A_55_P2090214	Cyb5r2	-3.26306	0.00655041		A_55_P2062255	Syne3	-3.47219	0.00839583		A_55_P2017636	Thbs1	6.71307	0.0367204
A_55_P2155499	Tmem9	-2.0309	0.00109508		A_55_P2090050	Ilkap	3.42132	0.0313786		A_55_P2062250	Gm5524	-4.72702	0.0268643		A_55_P2017487		2.56755	0.0018084
A_55_P2155372	Gm12695	-2.45606	0.000108387		A_55_P2089888	Zfp451	-2.18172	0.00148633		A_55_P2062246	Tgtp2	2.90118	0.0125052		A_55_P2017418	Cfh	2.15195	0.000356789
A_55_P2155362		-2.21792	0.0052087		A_55_P2089362	Wfdc13	-2.20797	0.0285798		A_55_P2062213	Tmem41a	3.85101	0.000115119		A_55_P2017377	Olfr424	2.41649	0.00969584
A_55_P2155347	Grk4	3.72647	0.00386131		A_55_P2089198	Rgs7	-2.85742	0.0257688		A_55_P2062190	Gstm1	-8.03518	0.00385633		A_55_P2017347	Krtap11-1	16.6224	0.00143725
A_55_P2155312	Dock3	-3.2374	0.000376848		A_55_P2089100	Sly	-2.62828	0.00338174		A_55_P2062187	Shank1	2.12023	0.0450675		A_55_P2017160	Cdc14a	2.00543	0.00532619
A_55_P2155226	Ksr2	2.65296	0.00139019		A_55_P2089060	Slc7a14	-2.28468	0.0011884		A_55_P2062094		2.10077	0.0135666		A_55_P2017116		-8.35167	0.00283591
A_55_P2155197	Tnfrsf22	2.65482	0.0351473		A_55_P2088825	Foxp1	-2.08717	0.00150005		A_55_P2061991	Pnldc1	-2.01609	0.000614649		A_55_P2017115		7.05274	0.00781893
A_55_P2155146	Klrc3	-2.22844	0.00860542		A_55_P2088705	Sgsm1	2.65775	0.0351962		A_55_P2061737	Tmsb4x	2.37979	0.00752503		A_55_P2016842	Me1	-4.22202	0.00107141
A_55_P2154987	Krtap5-2	-3.42075	0.00244691		A_55_P2088380	C230072F16Rik	-2.02592	0.0447136		A_55_P2061495	Cks1b	-2.22345	0.00894867		A_55_P2016667	Gstm7	-2.04325	0.000489046
A_55_P2154977	Rpap3	3.8967	0.00115133		A_55_P2088296	Fam160b2	-2.21769	0.0393634		A_55_P2061421		2.16219	0.04446		A_55_P2016662		-2.2342	0.012625
A_55_P2154570	Pofut1	-2.42903	0.000834213		A_55_P2088251		-2.26852	0.00125307		A_55_P2061338	Slc16a11	-2.93662	0.000612632		A_55_P2016623	Gm5068	4.15051	2.89717e-05
A_55_P2154536	Hagh	-2.61501	0.000218038		A_55_P2088178	Cbln2	-5.67143	0.0234325		A_55_P2061219	Ces3a	-6.08304	0.000541183		A_55_P2016249	Ppid	-2.24007	0.000451151
A_55_P2154460		2.65909	0.0363781		A_55_P2088148		-2.48336	0.0209993		A_55_P2061104	Mup6	-15.5755	0.00231279		A_55_P2016166	Wfdc2	2.33605	0.00243614
A_55_P2154404		5.02662	0.00641393		A_55_P2088054	Syn3	-2.10991	0.0398642		A_55_P2061076	Gm3219	-3.54292	0.000509807		A_55_P2016114	Fasl	6.41404	0.00110058
A_55_P2154252	Gfpt2	2.83478	0.000675934		A_55_P2087944		-2.40832	0.0017754		A_55_P2060996		-2.36514	0.00129509		A_55_P2016034	Nlrc5	2.94406	0.00148788
A_55_P2154242	Gfpt1	2.77975	0.00153072		A_55_P2087691	Zfp874a	-2.28571	0.00339354		A_55_P2060991	BC005764	6.82667	0.00810829		A_55_P2015687	Phf11d	2.80314	0.00239334
A_55_P2154054	Myo18a	2.06157	0.00281122		A_55_P2087647	Grhpr	-2.22983	7.20452e-05		A_55_P2060849	LOC101056219	9.74855	0.000206594		A_55_P2015541	Hif3a	4.14617	0.00556241
A_55_P2154049	Myo18a	8.069	0.00463834		A_55_P2087622	Il4i1	-2.22875	0.0229775		A_55_P2060707	Il15ra	2.7564	0.0462089		A_55_P2015437		-2.77541	0.0211418
A_55_P2153887	Tatdn3	-2.16113	0.00179758		A_55_P2087607	Cp	2.08571	0.00837065		A_55_P2060667	Krt9	-4.13318	0.00409598		A_55_P2015292	Ltc4s	-2.06613	0.017761
A_55_P2153753	5830411N06Rik	-2.75445	3.86752e-05		A_55_P2087533	Gm10498	-5.001	0.0333291		A_55_P2060630	Stk11ip	2.05719	0.0108241		A_55_P2014978	Dvl3	-2.2027	0.0130183
A_55_P2153740		-2.36309	0.000731859		A_55_P2087518	Exoc8	-2.28519	0.00310347		A_55_P2060386	Col15a1	-2.12541	0.0169568		A_55_P2014720		-2.10808	0.0499213
A_55_P2153621	Ahnak	-4.47349	2.97375e-05		A_55_P2087265	Ifitm1	3.25371	0.00692488		A_55_P2060333	S100a5	2.24596	0.0173332		A_55_P2014665	Racgap1	2.41195	0.0138272
A_55_P2153431	Ralgds	2.35636	0.000371386		A_55_P2087193	Ear4	-2.2668	0.0010891		A_55_P2060303	Mras	-2.0778	0.00221341		A_55_P2014520	Zfp787	-2.0278	0.01307
A_55_P2153231	Ski	2.1567	0.00115693		A_55_P2087066	Slc25a10	-2.0301	0.0407385		A_55_P2060111	ATP8	-2.05214	0.000434364		A_55_P2014169	Ppa2	-2.25859	0.000685252
A_55_P2153122	Zap70	-2.7819	0.000839886		A_55_P2087053	Gm11437	-2.56859	0.00590771		A_55_P2060107	Pkm	2.11761	0.00332813		A_55_P2014149		7.64693	6.65684e-05
A_55_P2153111	Dtnb	-2.28219	0.0198215		A_55_P2086983	Atxn2	-2.09699	0.00174975		A_55_P2059890	Fdx1	-2.83385	0.00135782		A_55_P2014114	Atp5j	-2.05981	0.0253025
A_55_P2153016	Ccdc34	-2.05839	0.0213039		A_55_P2086860	Ccdc121	-2.09142	0.00301584		A_55_P2059854	Cd101	3.0241	0.0258629		A_55_P2013823	Gal3st1	2.25949	0.0443417
A_55_P2152991	Ccdc64	-3.70322	0.010777		A_55_P2086730	Olfr910	-5.64852	0.00693271		A_55_P2059820	Aadat	-3.08623	0.000632229		A_55_P2013760	Slc39a14	4.02484	0.00881844
A_55_P2152946	Scaf8	2.33341	0.000744244		A_55_P2086664	Tspan33	-2.45895	0.00437827		A_55_P2059640	Abhd14b	-2.32863	0.00910027		A_55_P2013710	Apoc3	-2.79245	0.000187177
A_55_P2152872	Fgfrl1	-2.99295	2.78337e-05		A_55_P2086075	Ube2h	-2.01385	0.0137766		A_55_P2059591		2.79156	0.00626531		A_55_P2013655	Cd4	-2.51615	0.00416944
A_55_P2152836		-2.48657	0.00515835		A_55_P2085955	Dnajb11	-2.21302	0.0079846		A_55_P2059586	Fmo3	15.5887	0.00173978		A_55_P2013465	L2hgdh	-2.01798	0.0190699
A_55_P2152676	Adam20	-2.89078	1.93991e-05		A_55_P2085771	Pcnxl2	2.43194	0.00395385		A_55_P2059412	Ghr	-4.74573	0.000216028		A_55_P2013203	Oxtr	-2.40439	0.00362865
A_55_P2152607	Cyp4a12b	-308.065	4.36629e-06		A_55_P2085761	Calr3	-2.12255	0.00787497		A_55_P2059312	Map2	4.70514	0.000246273		A_55_P2013043	Serpinb6b	2.06478	0.00674761
A_55_P2152528	Gm3852	-2.27278	0.0127411		A_55_P2085651	Ankrd34a	-2.12387	0.0089259		A_55_P2059254	Hnrnph3	-3.46653	0.0380851		A_55_P2013038	Serpinb6c	2.02321	0.00251256
A_55_P2152487	Gapdhs	-2.58996	0.00286349		A_55_P2085596	Nudt1	-2.45323	0.00195544		A_55_P2058988		-3.49151	0.0011092		A_55_P2012899	Vsig4	3.6015	0.000946993
A_55_P2152387	Wwox	-2.15063	0.0193776		A_55_P2085400	Gpam	-2.11079	0.0104374		A_55_P2058962	Mcm10	-7.67253	0.0136171		A_55_P2012849	Dock10	3.45073	0.00812368
A_55_P2152248	Cpe	2.45998	0.00314073		A_55_P2085391		2.23945	0.00731424		A_55_P2058957	Syt1	-9.73306	2.47406e-05		A_55_P2012704	Kcnh7	2.27287	0.0393083
A_55_P2152225	Ihh	-10.5121	0.00052939		A_55_P2085368	Pbsn	-2.242	0.00116896		A_55_P2058942	Aldh3b1	3.00497	0.00312003		A_55_P2012599		2.93254	0.0171253
A_55_P2152049	Xrcc3	-3.74052	0.000182815		A_55_P2085240		-2.30142	0.00113213		A_55_P2058783	Hilpda	5.51415	0.0016126		A_55_P2012439	Tnfrsf19	-3.23427	0.04165
A_55_P2152014		-2.68336	0.00351723		A_55_P2085210		-3.28429	0.00613611		A_55_P2058646	Nhlh1	7.04514	0.00229003		A_55_P2012246		2.2856	0.0240421
A_55_P2151986	Gngt2	3.90123	0.00012107		A_55_P2084980	Dcaf12l2	-2.58967	0.0458022		A_55_P2058613		-2.27947	0.00615422		A_55_P2011937	Fignl1	3.18045	0.00454598
A_55_P2151956		-47.6075	0.00448658		A_55_P2084965	Klk13	-3.17034	0.024711		A_55_P2058601		4.65809	0.0166041		A_55_P2011922	42803	-2.48562	0.00419857
A_55_P2151832		-2.71085	5.04933e-05		A_55_P2084925	Olfr642	-2.36225	0.0030093		A_55_P2058433	Cyp2c68	-4.38126	5.88296e-05		A_55_P2011712	Dlg1	2.70955	0.00767252
A_55_P2151762	Atg7	-2.00971	0.00519044		A_55_P2084617	Fam78a	3.93568	0.00935241		A_55_P2058340	Prdx4	-2.0411	0.0227805		A_55_P2011387	Tifa	7.36911	0.00734742
A_55_P2151685	Pira11	5.19384	0.000926454		A_55_P2084601		3.14246	0.0491614		A_55_P2057941	1700049G17Rik	-2.07539	0.0141856		A_55_P2011385		8.02537	0.00450428
A_55_P2151609	Sorl1	9.9862	0.000430628		A_55_P2084542	Gm10814	-3.36992	0.0235195		A_55_P2057803	6330403A02Rik	-3.88381	0.00843277		A_55_P2011341		56.7413	5.52636e-06
A_55_P2151556	C8g	-2.59761	0.000467308		A_55_P2084413	Lrrtm2	-2.12469	0.00259053		A_55_P2057577	Ugt1a6a	-2.82968	0.00326237		A_55_P2011245	Ldoc1l	-2.48044	0.0463052
A_55_P2151428	Fut9	2.77123	0.00112199		A_55_P2084263		-4.52021	0.000431774		A_55_P2057537	Gas7	-2.29342	0.0316046		A_55_P2011106	Junb	2.23015	0.0182607
A_55_P2151308		-7.58496	0.000101306		A_55_P2084251	Kcna4	-3.02779	0.0140198		A_55_P2057446	Ccdc134	2.29338	0.00972323		A_55_P2010912	Jak3	3.84289	0.00079016
A_55_P2151061	Gm3613	2.54451	0.0344453		A_55_P2084237		-2.16478	0.00539157		A_55_P2057430	Lipn	-11.6516	0.000241487		A_55_P2010773	Tbx2	2.57229	0.0116675
A_55_P2151031		-2.30636	0.00015187		A_55_P2084128	Rbm12b2	2.38726	0.0141686		A_55_P2057283		-2.17461	0.0162274		A_55_P2010567		4.23864	0.000619723
A_55_P2150941	Olfr367-ps	-4.03072	0.0196611		A_55_P2083879	Vsig2	2.63193	0.0368681		A_55_P2057118	Mid1	2.66016	0.0491069		A_55_P2010547		4.73029	0.00451281
A_55_P2150908	Atp5c1	-2.22849	0.000606052		A_55_P2083649	Alas1	4.91452	0.0316354		A_55_P2057076	Magix	-2.21997	0.0144943		A_55_P2010271	Samsn1	9.25464	0.00254578
A_55_P2150876	Als2cr12	-10.4774	0.00670526		A_55_P2083304	Capn9	-2.13708	0.000438473		A_55_P2057070	Magix	-2.52849	0.0017151		A_55_P2010197	Serpina10	3.23667	0.000428059
A_55_P2150851	Pla2g3	-2.44557	0.00372583		A_55_P2083297	E230025N22Rik	-2.63017	0.0455102		A_55_P2056639	Bcar1	-2.23463	0.00151298		A_55_P2010196	Serpina10	4.668	0.000749379
A_55_P2150786	Mul1	-2.03322	0.00504661		A_55_P2083198		-2.19958	0.00151168		A_55_P2056496	Tk1	-11.2074	5.18894e-06		A_55_P2010152	Sell	6.04568	0.00490038
A_55_P2150734		-2.48373	6.51739e-05		A_55_P2083180	Gm10272	2.12043	0.00377637		A_55_P2056493	Tk1	-11.8621	0.000316574		A_55_P2010097	Mup2	-2.49515	0.0301949
A_55_P2150652	Socs6	-2.14376	0.037885		A_55_P2083121	Vill	4.20879	0.0123996		A_55_P2056473	Spc24	-8.35738	0.000544623		A_55_P2010038	Tnfsf9	3.7264	0.0142305
A_55_P2150591	Ccdc60	-2.4602	0.000125523		A_55_P2082994		-2.31794	0.00140868		A_55_P2056342	Mgst3	-4.16014	0.000654662		A_55_P2010014	Map7d1	2.12762	0.000586592
A_55_P2150476		-9.78234	0.00616458		A_55_P2082733	Cybb	3.79826	0.0165085		A_55_P2056205	Fpr3	5.12284	0.00150851		A_55_P2009952	Me1	-3.93955	0.000334514
A_55_P2150351		3.51269	0.00787916		A_55_P2082658		2.35886	0.0275555		A_55_P2056106		-2.617	0.0292801		A_55_P2009882	Ccbe1	4.44114	0.00154925
A_55_P2150208	Ucn	-2.71592	3.68907e-05		A_55_P2082614	Zfp791	-2.78695	0.0169145		A_55_P2056085	Nek5	-2.67946	0.00344555		A_55_P2009861		2.2364	0.00786699
A_55_P2149942	Ninj2	6.24274	0.0013457		A_55_P2082434	Btbd11	2.7601	0.0264587		A_55_P2055854	Ppara	-2.79661	0.0168023		A_55_P2009787	Atp1a4	3.73025	0.0185737
A_55_P2149921		3.60636	0.00286453		A_55_P2082235		-2.12095	0.0129328		A_55_P2055819	Adam15	2.06052	0.0068799		A_55_P2009592	Gm608	-2.25034	0.0012647
A_55_P2149896	Fam211a	19.0212	0.000136214		A_55_P2082203	Baz1a	2.12225	0.0110609		A_55_P2055708	Vmn1r48	-3.03767	0.00923242		A_55_P2009582	Nkg7	2.30383	0.012453
A_55_P2149812	Srsf11	2.02991	0.00970285		A_55_P2082050	Ankrd12	3.24142	0.0142841		A_55_P2055694	Ocln	-2.69505	0.0142296		A_55_P2009111		-2.44991	0.015466
A_55_P2149763	Tapbp	2.80024	2.11398e-05		A_55_P2082028		-2.17117	0.00361822		A_55_P2055557	Sdsl	4.08691	0.000163393		A_55_P2009086	Creb3l1	-2.24094	0.0275098
A_55_P2149756	9530020O07Rik	-3.11555	0.00729132		A_55_P2081966	Slc22a20	-2.67181	0.0218305		A_55_P2055537	Slc16a6	3.43583	0.0202588		A_55_P2008926	Slc17a3	-2.01159	0.00613622
A_55_P2149719	Atp5k	-2.04806	0.000925419		A_55_P2081785	Slc45a1	-2.03971	0.0291991		A_55_P2055423		-6.82489	0.00160312		A_55_P2008740	Fcgr1	3.19086	0.00229177
A_55_P2149654	Dtx3	4.28107	2.71297e-05		A_55_P2081761		2.70432	0.00510262		A_55_P2055299		2.09239	0.00849618		A_55_P2008704	Gstp2	-5.39344	0.000192228
A_55_P2149363	6430548M08Rik	5.20583	0.000333592		A_55_P2081697	Fam228b	-2.42943	0.0292389		A_55_P2055168	Gm2016	2.89021	0.000269209		A_55_P2008651	Qdpr	-2.18079	0.00637552
A_55_P2149209	Camk2a	4.28933	0.00197437		A_55_P2081530	Sh3bgrl3	2.39991	0.0109566		A_55_P2055112	Prss44	-2.78359	0.0276743		A_55_P2008016	Armc3	3.81061	0.043397
A_55_P2149149		-2.58182	0.00153471		A_55_P2081525	Olfr1200	-2.24454	0.00165691		A_55_P2055087	Prkar2b	2.14485	0.00690621		A_55_P2007964	Cx3cr1	2.95475	0.0241617
A_55_P2149083	Fpr-rs6	5.44679	0.000316314		A_55_P2081488	Pglyrp1	7.87213	0.0181256		A_55_P2055042	Mnf1	-2.30644	0.000567639		A_55_P2007919	Akr1c19	-2.38497	0.0312925
A_55_P2148949		-2.70676	0.0490882		A_55_P2081393	Zfp945	-2.08464	8.6101e-05		A_55_P2054942	Iffo2	2.89202	0.00025117		A_55_P2007886		-2.64539	0.0208755
A_55_P2148873	Cat	-2.35269	0.00304863		A_55_P2081283	Dlx4	-2.01028	0.0178374		A_55_P2054857	Ube2v2	4.12551	0.00121447		A_55_P2007816	Mup4	-5.0349	0.00971561
A_55_P2148748	Dclk1	4.24764	0.0106355		A_55_P2081178	Msl3l2	-2.39438	0.0371139		A_55_P2054854	Art4	2.12385	0.0245013		A_55_P2007713	Tspan4	2.80219	5.13049e-05
A_55_P2148746	Ptma	-2.53454	9.38781e-05		A_55_P2081164	Cd300lf	10.7749	0.0388162		A_55_P2054708		-2.8431	0.000112529		A_55_P2007646	Cryaa	-4.04195	0.0200809
A_55_P2148655	Paqr6	2.528	0.00142418		A_55_P2081116	Fam89a	-3.78606	0.00909404		A_55_P2054445	Cd84	4.55534	0.00893952		A_55_P2007630	Sez6l2	2.6983	0.0468524
A_55_P2148624	Gpr61	-2.21907	0.00290328		A_55_P2081105	AI607873	2.60926	0.0276449		A_55_P2054437	Ttpal	4.82503	0.00509288		A_55_P2007601	Sftpd	2.32005	0.00216884
A_55_P2148569	A430060F13Rik	-2.91117	0.00012649		A_55_P2081030	Gpr25	2.54476	0.00565687		A_55_P2054409	Pira2	4.79384	0.00603295		A_55_P2007496		2.44579	0.0389555
A_55_P2148554		-2.05127	0.0179209		A_55_P2080956	Chka	-4.06416	0.00400379		A_55_P2054342	2810408I11Rik	-2.42088	0.00197167		A_55_P2007495		2.99933	0.0123776
A_55_P2148534	Nr1d2	-2.25174	0.0279329		A_55_P2080855	Olfr827	-2.46235	0.0129184		A_55_P2054256	Mzt2	-2.31292	0.00200721		A_55_P2007389	Fam189b	2.02967	0.0408807
A_55_P2148531	Pithd1	-4.2092	0.000112939		A_55_P2080774	Qdpr	-2.18304	0.000135282		A_55_P2054132	Tulp2	-2.33677	0.0121844		A_55_P2007326	Cyp2a4	-2.50193	0.0164484
A_55_P2148370		3.69551	0.00010742		A_55_P2080758	Slc8a1	3.17189	0.00456238		A_55_P2053988	Epas1	2.56891	0.00112165		A_55_P2007155	Akr1c14	-2.70713	0.0190632
A_55_P2148333	2810021J22Rik	2.65352	0.0147417		A_55_P2080735		-2.34417	0.0114013		A_55_P2053933	Foxa1	-2.13457	0.00943628		A_55_P2007022	Cd97	2.16104	0.00152057
A_55_P2148323	2810021J22Rik	-3.50486	0.0199848		A_55_P2080540	Map3k19	-2.10911	0.00239944		A_55_P2053838	Tnfaip3	7.43239	0.00122964		A_55_P2006930	2610005L07Rik	-3.56773	0.00200645
A_55_P2148171	Ncmap	-3.0181	0.00701667		A_55_P2080531	Poln	-2.15205	0.00126817		A_55_P2053647		-2.1731	0.0147115		A_55_P2006869	Fyb	5.26966	0.000106684
A_55_P2148071	LOC101056526	-2.31212	0.0415919		A_55_P2080378	Ttc30a2	-2.04554	0.00263885		A_55_P2053459	Timd2	-2.55302	0.00248993		A_55_P2006677	Gm7969	3.153	0.00768517
A_55_P2148062	Apol7c	-8.32487	0.000122341		A_55_P2080308		-2.18185	0.00105598		A_55_P2053302		3.86485	0.0398971		A_55_P2006494	Apol10b	15.0543	3.33907e-06
A_55_P2147896	C2cd4a	-2.2166	0.0102174		A_55_P2080210	Crisp4	-2.13889	0.00183232		A_55_P2053251	Gabrg3	-2.92475	0.00196532		A_55_P2006210	Fgf22	2.73923	0.0296112
A_55_P2147876	Fam108a	-2.06519	3.55984e-05		A_55_P2079855	Prl6a1	2.78146	0.0136619		A_55_P2053181	Nefh	-3.56685	0.0171496		A_55_P2006018	Slc4a2	-2.1893	0.000876984
A_55_P2147803	Madcam1	3.86521	7.25776e-05		A_55_P2079579	Pira7	2.65579	0.0129621		A_55_P2053097	Myo9a	2.89736	0.00177303		A_55_P2005956	Egfbp2	-4.54643	0.00944402
A_55_P2147791	Fam129c	3.72599	0.000594814		A_55_P2079561	Lilra6	2.2538	0.00298267		A_55_P2052897	Arhgap30	3.77303	0.00059731		A_55_P2005941	Plcxd1	-3.45532	0.00132906
A_55_P2147776	Slc38a11	2.90332	0.00939824		A_55_P2079560	Lilra6	3.28301	0.00637198		A_55_P2052862	Fam73a	4.14019	0.00100904		A_55_P2005898		-2.37307	0.00193323
A_55_P2147712	Ctla4	-2.20451	0.016155		A_55_P2079516	Mpp1	-2.03699	0.00277481		A_55_P2052853		2.75615	0.000526996		A_55_P2005859	Fn3k	-2.17185	0.0345869
A_55_P2147654	LOC100048185	-2.49704	8.75283e-05		A_55_P2079451		-2.19457	0.00233949		A_55_P2052848	Mif	-2.10972	0.000996961		A_55_P2005838	Ticrr	4.52285	6.41429e-05
A_55_P2147487	Cyth3	13.9808	0.000338314		A_55_P2079324	Sephs2	-2.0929	0.00348363		A_55_P2052834	Lst1	2.53824	0.0132486		A_55_P2005735	Trpm2	2.80822	0.0484012
A_55_P2147402	Gm6116	-2.08323	0.00113474		A_55_P2079231	Svs1	-2.16865	0.00163169		A_55_P2052824	Lrrc14b	-2.15941	0.0179663		A_55_P2005585	Trps1	3.07244	0.00107251
A_55_P2147310	Mkl1	3.81266	0.000229662		A_55_P2079142	Fam124b	3.09693	0.00482136		A_55_P2052719	Nadkd1	-2.80951	0.000153303		A_55_P2005501	Olfr392	-3.99222	0.00736915
A_55_P2147250	Caprin2	-2.01934	2.56754e-05		A_55_P2078955	Aqp8	-4.03242	0.000994932		A_55_P2052563	Id1	3.56172	0.000654774		A_55_P2005470	Mfap4	-2.08986	0.017058
A_55_P2147245	Kcnh8	-2.39404	0.0414763		A_55_P2078831		2.05514	0.00684946		A_55_P2052555	Dpysl5	3.24891	0.0272868		A_55_P2005213	Ces2c	-6.76003	0.00704213
A_55_P2147136	Akr1d1	-7.06806	0.00471317		A_55_P2078790	Olfr25	-2.79967	0.00268608		A_55_P2052425	Setd4	-2.62071	0.0074955		A_55_P2005016	Dcps	-3.05349	0.0114384
A_55_P2147081	Tnfaip6	5.45211	0.00514409		A_55_P2078494	Cib3	-9.37812	0.0106033		A_55_P2052290	Psat1	9.18197	0.00395669		A_55_P2004797	Tacc2	4.67328	0.0300373
A_55_P2147026	Tmc1	-2.48003	0.000149355		A_55_P2078438		-2.23097	0.00171426		A_55_P2052145	Ly6g6d	2.9543	0.00235249		A_55_P2004781	Ass1	-2.19821	0.0317656
A_55_P2146906		-2.41872	0.0024302		A_55_P2078433	Mcoln2	6.52479	0.000765212		A_55_P2052016	Crispld2	3.49116	0.00691896		A_55_P2004777	Micall2	2.53089	0.000270582
A_55_P2146847	Olfr681	-4.57459	0.0128844		A_55_P2078163	Mdga1	-2.47879	0.0114433		A_55_P2051949	Elmod3	2.80531	0.00268844		A_55_P2004732	Ttc39a	5.6572	0.00275711
A_55_P2146783	Ropn1l	-2.76186	0.00892135		A_55_P2078143	Otop1	-3.6673	0.0190432		A_55_P2051885	Bco2	-3.41596	0.000457075		A_55_P2004727	Gm10353	-2.16094	0.00391194
A_55_P2146708	Zcchc9	-3.03349	0.00124305		A_55_P2077909	Tpgs2	2.80537	0.0100486		A_55_P2051879	Ccdc171	-4.01754	0.00369731		A_55_P2004613		-2.29627	0.0232132
A_55_P2146693		-4.22241	0.00173678		A_55_P2077884	Kat6b	2.23577	0.00935723		A_55_P2051741	Lbx1	-2.9362	0.0268611		A_55_P2004606	Serpina4-ps1	-7.4581	0.01216
A_55_P2146655		2.74139	0.0498136		A_55_P2077783	Tubb2a-ps2	-6.02609	0.000196682		A_55_P2051666	Nfkbib	7.58132	0.000993492		A_55_P2004562	Klra2	4.00858	0.0131808
A_55_P2146468	Gm8633	-5.07013	0.0489574		A_55_P2077546		2.8084	0.0147579		A_55_P2051656	Shank2	-4.98129	0.0014424		A_55_P2004507	Ifi203	3.51773	0.00281861
A_55_P2146279	Nop9	2.17374	0.000161207		A_55_P2077524		-2.35346	0.000926114		A_55_P2051596		5.69744	7.21748e-05		A_55_P2004447	Fgl1	7.57285	0.00393989
A_55_P2146254	Ifitm1	6.91038	5.37727e-07		A_55_P2077158	Mro	-2.44526	0.00101176		A_55_P2051486	Mup20	-2.98341	0.00698276		A_55_P2004119		-2.12959	0.0377186
A_55_P2146177	Cerk	2.82716	0.00233267		A_55_P2077143	Mcin	2.40882	0.0179056		A_55_P2051455	D2hgdh	-2.12202	0.00476272		A_55_P2004099		-2.17564	0.00288409
A_55_P2146122	Zfp763	2.16854	0.000239457		A_55_P2077048	Itih5	-2.53504	0.000537583		A_55_P2051414	Axl	2.45077	0.0253136		A_55_P2004031	Ctrc	-2.21555	0.0489188
A_55_P2146058	Olfr247	-3.85967	0.00499331		A_55_P2076891	A330050F15Rik	-2.61476	0.0176777		A_55_P2051259	Sco1	-2.33812	0.00370049		A_55_P2004007	Gm4955	6.03377	0.00492486
A_55_P2145977	Fbxw15	3.60428	0.0323347		A_55_P2076861	Sema6d	2.05107	0.0216835		A_55_P2051159	Upp2	-34.5294	0.00116387		A_55_P2003981		3.43203	0.00831561
A_55_P2145922	Myh9	3.38257	0.00302328		A_55_P2076846	Tead2	2.31958	0.00428276		A_55_P2051099	Tnfrsf1a	2.62364	5.07538e-05		A_55_P2003911		5.50374	0.0101106
A_55_P2145838	Dmpk	2.56642	0.00290365		A_55_P2076805	Ddx5	2.45066	0.00438668		A_55_P2050828	Olfr469	3.39088	0.0162699		A_55_P2003883	Gm9909	-2.80754	0.0355735
A_55_P2145833	Dmpk	4.01141	0.000313313		A_55_P2076587	Tdpoz4	-2.6947	0.00484957		A_55_P2050778	Gpam	-2.0291	0.0174993		A_55_P2003492		-2.2359	0.032774
A_55_P2145775		3.65602	0.000135072		A_55_P2076538	Whamm	-2.14514	0.002169		A_55_P2050622	Sh3d19	-2.28816	0.000196399		A_55_P2003221	Gimap3	7.33478	0.000849863
A_55_P2145754	Atp5f1	-2.29787	0.000139521		A_55_P2076462	Lnx1	3.20176	0.0299763		A_55_P2050602	Ncam1	2.45575	0.0135583		A_55_P2003096	Pla2g6	-2.75826	4.58074e-05
A_55_P2145740	Nlrp9a	-3.06453	0.0244255		A_55_P2076448	Tmem255a	-2.72542	0.012281		A_55_P2050592	Gm5785	3.31475	0.00932827		A_55_P2003053	Dct	-4.14516	0.00917933
A_55_P2145739	Nlrp9a	-2.45323	0.000112795		A_55_P2076244		-3.11472	0.0498964		A_55_P2050226	Ccrl1	-10.1972	0.000452642		A_55_P2003033	P4ha3	-2.12319	0.00658566
A_55_P2145706	Thoc7	-2.24263	0.000177938		A_55_P2076064	Dnahc8	-2.3262	0.0150197		A_55_P2050044		30.1784	5.86165e-05		A_55_P2002988	Usp17ld	-3.43442	0.0111287
A_55_P2145637	Ap1s3	-2.89006	4.71288e-05		A_55_P2075714	Prr23a	-2.13208	0.00213829		A_55_P2049949		-2.13037	0.00145605		A_55_P2002968	Coro2a	3.25702	0.00585901
A_55_P2145617	Krt80	-2.41751	0.000459502		A_55_P2075706	Asphd1	3.08888	0.00154587		A_55_P2049771		-4.85292	0.00170899		A_55_P2002963	Coro1a	4.23114	0.00430718
A_55_P2145606	Kmo	-2.7058	0.000110788		A_55_P2075703	Gm904	-3.11068	0.048033		A_55_P2049582	Apbb3	2.22594	0.0043299		A_55_P2002933	Klk1b5	-4.23227	0.0115111
A_55_P2145531	Mpst	-2.42365	0.0011022		A_55_P2075657	5330426L24Rik	-2.48739	0.00883683		A_55_P2049567	Pld2	2.40729	0.0465514		A_55_P2002849	Aifm3	-2.65599	0.0161974
A_55_P2145470		3.20165	0.0180134		A_55_P2075469	Baalc	-2.10451	0.00285744		A_55_P2049262	Gm16525	-2.2636	0.0116146		A_55_P2002743		-2.49359	0.0462432
A_55_P2145376	Fastk	3.23566	0.00757473		A_55_P2075449	Ttll3	2.41055	0.0382143		A_55_P2049095	Atat1	-3.09747	0.00180446		A_55_P2002578	Ephx1	-3.1221	2.01212e-06
A_55_P2145287	Srd5a2	-3.23188	0.00467718		A_55_P2075298	Atp8a1	-2.74086	0.0163525		A_55_P2048912	Themis2	3.95215	0.00257769		A_55_P2002577	Ephx1	-3.30031	1.13021e-05
A_55_P2145237		4.20565	0.000310473		A_55_P2075191	Has2as	2.06743	0.021003		A_55_P2048867	Mirg	-3.26038	0.0302248		A_55_P2002572	Ephx2	-2.15837	0.000662979
A_55_P2145159	Six3os1	-2.65552	5.24594e-05		A_55_P2075127	Pax2	-2.48224	0.041824		A_55_P2048767	Efemp1	-2.32225	0.000191036		A_55_P2002309	Pip5kl1	-2.27503	0.0316971
A_55_P2145139		3.01969	0.00129546		A_55_P2075065	Gm10471	2.24342	0.0181762		A_55_P2048660		-3.4256	0.00230303		A_55_P2002135	Vmn2r-ps54	6.15825	0.00258072
A_55_P2144973	C130074G19Rik	-2.08243	8.83047e-05		A_55_P2075031	Eif4e1b	-2.28544	0.00523683		A_55_P2048588	Cdk1	-3.23746	0.0134179		A_55_P2002103	Hmha1	2.87791	0.00201243
A_55_P2144666	Prpsap1	-2.20037	0.000127236		A_55_P2074982	Lyar	-2.46075	0.00526647		A_55_P2048550	Hbb-bh2	-2.10035	0.00855181		A_55_P2001920	Flna	2.0818	0.00359146
A_55_P2144651		5.7517	0.000172057		A_55_P2074957	Tdpoz3	-2.44037	0.0208978		A_55_P2048493	4931440P22Rik	3.58064	0.000787606		A_55_P2001780	Cyp3a41b	-9.79173	0.0279234
A_55_P2144556	Flrt3	2.31801	0.0385205		A_55_P2074927	Gm7932	2.92956	0.0213696		A_55_P2048478	Olfml1	-4.01382	0.00548662		A_55_P2001553	Igdcc4	64.6362	0.0126537
A_55_P2144526	Fam65b	3.24071	0.00775288		A_55_P2074801	Ptpn14	2.60822	0.0102551		A_55_P2048368	Fggy	-2.39071	0.00312431		A_55_P2001489	Il19	3.89604	0.0175995
A_55_P2144512		-3.56459	0.000186107		A_55_P2074636	Adap1	2.51787	0.00764309		A_55_P2048284	Aasdhppt	-2.15815	0.00211988		A_55_P2001474	Klk1b26	-4.99096	0.0121646
A_55_P2144511	LOC101055971	-2.4042	0.000329021		A_55_P2074631	Cpeb1	2.96943	0.000278498		A_55_P2048279	Tlr13	4.61912	0.000583102		A_55_P2001218	Cd80	2.18391	0.0296653
A_55_P2144401	Gm4319	-2.63131	6.88742e-05		A_55_P2074536	Ppm1b	-2.08533	0.00123277		A_55_P2048176		2.26461	0.00961894		A_55_P2000833	E2f8	2.86067	0.0371687
A_55_P2144386	Emr1	2.47938	0.0175353		A_55_P2074521	Psg28	2.21214	0.00237785		A_55_P2047867	Elmod3	2.69464	0.00316789		A_55_P2000588	Rfx7	-2.62307	0.0220782
A_55_P2144341	BC033916	2.2298	0.0146556		A_55_P2074499	Kcp	-2.38138	0.00212078		A_55_P2047768	Serpinb6c	2.49698	0.029015		A_55_P2000574	Lrrc30	-2.05578	0.0240118
A_55_P2144235		-2.61653	7.29124e-05		A_55_P2074425	Ralyl	2.40707	0.00444086		A_55_P2047559	Ccp110	2.8881	0.00601121		A_55_P2000543	Cd209f	-4.62231	0.0344332
A_55_P2144115	1700125H20Rik	-3.59041	0.00516575		A_55_P2074406	Ldoc1	-2.68699	0.0142104		A_55_P2047330	AB099516	-4.03876	0.0175528		A_55_P2000487	Srebf2	2.37727	0.00861354
A_55_P2144090		-2.05447	0.0129722		A_55_P2074381		3.38917	0.00303191		A_55_P2047285	Lcn6	5.30199	0.00301321		A_55_P2000141	Ptpru	-2.0823	0.0391443
A_55_P2143995	Efcab1	-4.21348	0.00190725		A_55_P2074226	Fbxo8	-2.05524	3.80483e-05		A_55_P2047027	Sel1l2	4.60165	0.0470192		A_55_P1999902	Pip5k1a	22.5246	0.000878059
A_55_P2143923	Slc13a2	-5.96375	0.000403761		A_55_P2074193		-2.49571	0.00474726		A_55_P2046959	Mmp27	5.80489	0.0281876		A_55_P1999715		12.9428	0.000825103
A_55_P2143892		-2.38347	0.00547328		A_55_P2074174	Cpt2	-2.88949	0.000361356		A_55_P2046744	Cspg5	-23.2435	0.00495218		A_55_P1999561	Pram1	4.67847	0.00119698
A_55_P2143869	Skint5	2.01539	0.0199818		A_55_P2074144	Tmprss11e	-2.08575	0.00223964		A_55_P2046671		-109.006	2.44529e-05		A_55_P1999102	Pi16	4.30962	0.000954763
A_55_P2143851	Gm996	-2.08945	0.0046395		A_55_P2073507	2610528J11Rik	-2.14074	0.0453207		A_55_P2046494	Zfand4	-2.00136	0.00444062		A_55_P1999082	Clec14a	2.0564	0.0238592
A_55_P2143827		-2.34356	0.000195108		A_55_P2073503	Kcng1	-2.09653	0.00318802		A_55_P2046403	Ucn3	-4.73335	0.00447564		A_55_P1998943	Oas1a	9.68262	0.00137689
A_55_P2143765	Ugt1a6b	-4.9926	0.000746922		A_55_P2073445	Olfr183	-2.24644	0.00169536		A_55_P2046184	Ccdc90b	-2.04888	0.000275847		A_55_P1998937	H2-M11	-2.00624	0.0155882
A_55_P2143693	Sytl1	-2.02318	0.00164184		A_55_P2073345		-2.13136	0.00809264		A_55_P2046145	Gm10693	5.2622	0.00212537		A_55_P1998737	9130015A21Rik	13.8546	0.0127491
A_55_P2143641		2.23866	0.0441482		A_55_P2073253		2.37929	0.000455128		A_55_P2046074	Tmem44	-2.14255	0.014143		A_55_P1998688	Gm2012	2.2429	0.00196895
A_55_P2143441		-2.47458	0.00573709		A_55_P2073238	Daf2	2.54691	0.0318561		A_55_P2045859		-5.74849	8.32596e-07		A_55_P1998601	Slc17a9	3.02695	0.00234077
A_55_P2143436		-3.37055	0.0202894		A_55_P2073219	Hps4	-2.00851	0.0115845		A_55_P2045777		2.47283	0.0478564		A_55_P1998578	Ifitm2	3.63527	0.000394725
A_55_P2143336	Rpp21	-2.03364	0.00450613		A_55_P2073205	LOC101056044	-3.21725	0.00297351		A_55_P2045741	Fyb	3.19336	0.000127527		A_55_P1998539	C1qtnf1	2.65442	0.00103235
A_55_P2143311	Pdxk	-2.19514	9.54e-07		A_55_P2072856		5.40491	0.0467478		A_55_P2045549	Dpy19l1	2.4183	2.14807e-05		A_55_P1998471	S100a9	23.4497	0.000150808
A_55_P2143279	Nkd2	2.0346	0.00383351		A_55_P2072611	42795	-2.11675	0.0117203		A_55_P2045528	Atxn1	-2.31395	0.0326664		A_55_P1998456	Birc7	-2.67824	0.0146746
A_55_P2143184	Hrh4	2.31347	0.0019397		A_55_P2072508	Gm10648	2.02385	0.00124477		A_55_P2045414	Hipk4	-2.02545	0.000143712		A_55_P1998115	Klkb1	-2.24782	0.0192563
A_55_P2143131	Rwdd3	-2.94939	0.00616454		A_55_P2072453	42795	-2.05299	0.000423336		A_55_P2045234		2.27788	0.00118887		A_55_P1997756	Il6	8.68744	0.000769382
A_55_P2143075	Ubc	-2.0404	0.0184142		A_55_P2072403	Suv39h2	-2.32687	0.0282709		A_55_P2045198	Trpc4	4.22894	0.0222464		A_55_P1997604	Pla2g4a	4.92926	0.0049954
A_55_P2143070	Ass1	-4.91095	0.000310154		A_55_P2072373	Msn	2.22787	0.0289087		A_55_P2045163	Ehmt1	2.71535	0.0408783		A_55_P1997585		-2.40396	0.0181181
A_55_P2143041	Phgdh	2.76916	0.0400867		A_55_P2072110	42981	-2.6746	0.0188866		A_55_P2045136	I830127L07Rik	4.33916	1.63728e-05		A_55_P1997509	Zbtb32	3.53323	0.00683945
A_55_P2142934		2.36375	0.00927423		A_55_P2072080	Zfp142	2.87998	0.000649028		A_55_P2045114	Tmem242	-2.39258	0.00820362		A_55_P1997225	Agap2	4.2798	0.000352959
A_55_P2142853		-3.69355	0.00507689		A_55_P2072041		2.1376	0.02055		A_55_P2045096	Hjurp	-2.39845	0.0113604		A_55_P1997106	Gyltl1b	2.03245	0.00957212
A_55_P2142818	Slc5a7	-2.74824	0.00292403		A_55_P2072005	Ctsc	2.78159	0.0146991		A_55_P2045083		2.5052	0.00844546		A_55_P1997105	Gyltl1b	-2.94581	0.000322483
A_55_P2142724		-3.0542	0.00941081		A_55_P2071996		2.40178	0.0201188		A_55_P2045055	Clec10a	2.45426	0.0115288		A_55_P1997003	Serpina4-ps1	-7.48843	0.00972679
A_55_P2142695	E330014E10Rik	-2.37379	0.000100299		A_55_P2071921	LOC101056369	-2.4557	0.00647233		A_55_P2045007	Hrh1	2.21014	0.00288372		A_55_P1996973	Gvin1	3.72431	0.000319696
A_55_P2142662		36.8265	1.16592e-05		A_55_P2071906		9.23078	0.0187001		A_55_P2044932	Gpr84	8.81087	0.00918573		A_55_P1996941	Ube2c	2.38763	0.0266206
A_55_P2142607		-2.64776	7.47954e-05		A_55_P2071526	Papln	3.278	0.000173002		A_55_P2044659	Gm10532	2.92833	0.00851028		A_55_P1996821		9.14051	0.0184484
A_55_P2142451	Echdc2	-2.47981	0.000180436		A_55_P2071466	Ncf1	2.43949	0.0210101		A_55_P2044613	Hsf4	-2.16629	0.00538108		A_55_P1996702	Grm8	2.02326	0.00545625
A_55_P2142439	Echdc2	-2.02662	0.00107109		A_55_P2071441	Kcnip1	-2.33883	0.00900664		A_55_P2044582	Iglon5	-2.30387	0.00145629		A_55_P1996674	Itih3	3.09043	0.000383873
A_55_P2142430	Bank1	2.03394	0.0273028		A_55_P2071322		-2.22987	0.00102395		A_55_P2044547	2810416G20Rik	4.03021	0.000358526		A_55_P1996266	Tlr8	2.444	0.000524683
A_55_P2142425	Gm19333	6.45523	0.00183735		A_55_P2071191	Prss8	-2.12142	0.0052344		A_55_P2044242	Slc13a5	31.0745	0.000432862		A_55_P1995537	Mpo	13.1348	0.000578101
A_55_P2142420		-3.66564	0.00572034		A_55_P2071059	Nab2	-2.20954	0.0313735		A_55_P2044232	Slc10a5	-2.17616	0.0339759		A_55_P1995205	Top2a	6.81221	0.00945898
A_55_P2142376		-2.15212	0.0088209		A_55_P2070992	Aldoc	-2.77945	0.00345861		A_55_P2044207	Bphl	-3.24034	1.06414e-05		A_55_P1995195	Fosl2	2.66733	0.0352272
A_55_P2142321	Synpo	2.26933	0.000483103		A_55_P2070869	Lcn2	67.7503	0.031024		A_55_P2044187		-2.30203	0.00697032		A_55_P1995133		-5.56803	0.00296912
A_55_P2142251	Hist2h3c2	2.49537	0.00267807		A_55_P2070628		2.72234	0.0116156		A_55_P2043992		4.19562	0.00331674		A_55_P1995103		-2.3518	0.00128476
A_55_P2142232	Serpina3i	76.3418	0.00110056		A_55_P2070603	Cxxc4	-3.56679	0.008953		A_55_P2043977	Mtm1	2.68542	0.0155285		A_55_P1994939	Hmgb2	2.98261	0.00138434
A_55_P2142226	Serpina3f	8.17828	0.00147233		A_55_P2070386	Nlrp4a	-2.4445	0.00121986		A_55_P2043782	Trpm1	-2.82877	0.0201793		A_55_P1994927	Rab3il1	2.22057	0.0189954
A_55_P2142222	Serpina3h	-2.03353	0.0077657		A_55_P2070306	Gm3173	2.09636	0.0289811		A_55_P2043734	Cdkl5	-3.73056	0.0126776		A_55_P1994733	Tmem14a	-3.58671	0.0142788
A_55_P2142116		-3.27471	0.00122678		A_55_P2070296	D330025C20Rik	-2.07755	0.00250204		A_55_P2043718	Cacna1f	2.07765	0.0286595		A_55_P1994112	Sema5b	-2.74602	0.0112055
A_55_P2142103		-2.61803	7.80533e-05		A_55_P2069774	Iba57	-2.15347	0.00286726		A_55_P2043652	Zfp667	2.1833	0.000623823		A_55_P1994042	Zbp1	3.56903	0.00359156
A_55_P2142033	Clip4	-3.36445	0.00841534		A_55_P2069755	Tymp	-2.88472	0.0077787		A_55_P2043509	Hnmt	-2.96116	0.0017059		A_55_P1993984	Hemk1	-2.13821	0.00230461
A_55_P2141978	Nr3c2	-2.90988	0.00482257		A_55_P2069714	Sqstm1	-2.21675	0.00138009		A_55_P2043367	Apol9a	-5.39481	2.52085e-07		A_55_P1993940	Sh3bgrl3	3.75586	8.33552e-05
A_55_P2141923		-3.08796	0.000187617		A_55_P2069674	Olfr446	-2.37767	0.0135575		A_55_P2043277	Siglec5	2.9219	0.0343618		A_55_P1993777	Rbfox3	2.14896	0.00615937
A_55_P2141884	Tagln2	2.86965	0.00162708		A_55_P2069450		-4.89444	0.0030012		A_55_P2043267	Cdc42se1	2.24373	0.000434025		A_55_P1993475	Gm5168	2.11448	0.0469634
A_55_P2141835		-2.543	9.71967e-05		A_55_P2069425	Ttll3	2.81898	0.000224347		A_55_P2043187	Exosc9	2.47306	0.0470612		A_55_P1993365		-2.1159	0.0225756
A_55_P2141820		2.01089	0.000530641		A_55_P2069144		-2.07031	0.0112218		A_55_P2043062	Hs3st6	-2.29587	0.00765985		A_55_P1993089	Gm4583	-2.37192	0.0170002
A_55_P2141786	Pard6g	2.34525	0.000122287		A_55_P2069087	Vmn2r67	-3.13551	0.0430376		A_55_P2042988	Aoah	10.7885	0.00823376		A_55_P1992959	Pfkfb4	4.12973	0.000396435
A_55_P2141729	Snrnp27	-3.12381	0.00260244		A_55_P2069083	Galnt12	3.00296	0.00842739		A_55_P2042973	1010001N08Rik	3.10593	0.0201706		A_55_P1992720		2.06036	0.0408563
A_55_P2141464	Mageb17-ps	-3.15855	0.00153551		A_55_P2068882	Ccng2	-2.72046	0.00549224		A_55_P2042923	Sgk2	-2.64568	0.00844465		A_55_P1992617	Clec1b	4.22341	0.00149363
A_55_P2141454	Cacng3	-2.91712	1.85066e-05		A_55_P2068595	Gm18756	-2.32029	0.00205346		A_55_P2042778	Pde5a	-3.48872	0.00319271		A_55_P1992582	Hmgcs2	-2.34446	0.0232319
A_55_P2141167	Zbtb49	-2.83806	2.95911e-05		A_55_P2068501		-2.15403	0.00268609		A_55_P2042637	Spats1	8.76895	1.40541e-05		A_55_P1992555	Gys2	-2.0895	0.00611532
A_55_P2141105	Ighv5-12	4.72956	3.809e-05		A_55_P2068350	Ido2	-2.01234	5.20524e-05		A_55_P2042560	Ormdl2	-2.20594	0.00128786		A_55_P1991945		-2.35835	0.000599684
A_55_P2141068	Mcu	-2.62694	0.000679183		A_55_P2068295	Gm3552	2.90468	0.0365341		A_55_P2042319	Cyp2d40	-5.081	0.000469401		A_55_P1991911	LOC101056478	-2.19025	0.0466446
A_55_P2141058	Gm4477	-8.86677	0.00477784		A_55_P2068248		2.11346	0.00421556		A_55_P2042297		-2.19715	0.00960734		A_55_P1991841	Slc22a27	4.63155	0.0498536
A_55_P2141008	Siglech	-2.12609	0.00138059		A_55_P2067952		-2.81389	0.00970483		A_55_P2042121	Slc25a22	2.69486	0.0162863		A_55_P1991773	Icos	3.63059	0.00835354
A_55_P2140870	Gm6034	-2.11297	0.0339187		A_55_P2067747	Psg21	-3.58559	0.0279456		A_55_P2041976	Akap4	3.30747	0.0042502		A_55_P1991770	Pdlim4	2.21788	0.00112868
A_55_P2140764	Ssu72	-4.05582	0.00663095		A_55_P2067707	Mep1a	-2.29013	0.0376413		A_55_P2041723	Mid1ip1	-7.14904	0.000601346		A_55_P1991688	Rad51ap1	2.69701	0.0257261
A_55_P2140751		2.99113	0.00716439		A_55_P2067698		-2.21373	0.00250703		A_55_P2041708	Gas2	-3.5445	0.00347316		A_55_P1991560	Lilra5	2.01325	0.0280694
A_55_P2140676	Entpd7	2.2207	0.0244922		A_55_P2067652	Boc	3.83513	0.00212131		A_55_P2041668	Foxl2	-3.47175	0.000312138		A_55_P1991505	Gamt	-3.02334	0.0352836
A_55_P2140651	Creg2	-3.64311	0.00211876		A_55_P2067518	Slc13a3	2.27804	0.017311		A_55_P2041614	Cerkl	9.46417	0.000128876		A_55_P1991295	BC029214	-2.4376	0.00779325
A_55_P2140646	Creg1	-2.72446	0.000187275		A_55_P2067505	Slc16a3	4.24896	0.0216369		A_55_P2041592	Rdh1	3.77751	0.0466518		A_55_P1991214	Lair1	2.53914	0.00151591
A_55_P2140606		2.02531	0.00342101		A_55_P2067463	1700110I01Rik	-3.20236	0.0107823		A_55_P2041521	Doxl2	-2.66703	0.00221863		A_55_P1991199	Nos1ap	5.799	0.00186055
A_55_P2140516	Pex13	-2.05486	6.84919e-06		A_55_P2067391		-2.23758	0.0171727		A_55_P2041457		-2.19774	0.0373583		A_55_P1990944	Casp1	2.39233	0.00895601
A_55_P2140487		-2.32305	0.000103268		A_55_P2067366	Zfp827	4.21641	0.00381359		A_55_P2041090	Tyw5	-2.53149	3.26375e-05		A_55_P1990870	Mylk3	-3.18355	0.00251144
A_55_P2140423	Arfip2	3.1515	0.000556325		A_55_P2067041		-2.24591	0.00393744		A_55_P2040962	Gm1604b	-3.01247	0.00113431		A_55_P1990346	Adamdec1	7.42162	0.000355447
A_55_P2140383	Mis18a	-2.27506	0.00197189		A_55_P2067036		-2.62588	0.00336008		A_55_P2040860	Sun3	-13.741	0.00207274		A_55_P1990324	Ptprc	5.49526	0.000486466
A_55_P2140348	Igh-VJ558	-3.02244	4.9209e-05		A_55_P2067011	Agxt2l2	2.76438	4.89978e-05		A_55_P2040838	Gm14548	7.91767	0.000474549		A_55_P1990038	Mark2	2.80009	5.47456e-06
A_55_P2140288	Phka2	-2.27172	2.02403e-05		A_55_P2066792	Sp110	-2.15398	0.0228404		A_55_P2040678	Susd2	2.224	0.0384433		A_55_P1989846	Tm6sf1	2.71025	0.0138912
A_55_P2140212		3.69806	5.81141e-05		A_55_P2066778	AB124611	2.68714	0.0364305		A_55_P2040485	Ms4a4a	43.0456	6.49483e-05		A_55_P1989658	Slco1a1	-29.4163	0.0266824
A_55_P2140107	Cyp21a1	3.80836	0.0386992		A_55_P2066563	Mcu	2.99036	0.0278612		A_55_P2040455	Ano10	2.06844	0.00118235		A_55_P1989539	Cklf	2.27895	0.00119503
A_55_P2140057	Krt32	-2.97628	2.64866e-05		A_55_P2066553	Oacyl	2.67891	0.0191082		A_55_P2040090	Fn3k	-2.99664	0.00449701		A_55_P1989149	Olfr394	-4.15975	0.0156562
A_55_P2140042	Krt31	-2.5312	0.000802574		A_55_P2066543	Orai2	2.99544	0.000306458		A_55_P2040026	Itga4	4.32522	0.00961951		A_55_P1989116		2.26567	0.00646153
A_55_P2140022	Krt35	-2.79267	0.000103471		A_55_P2066505	Mpo	-2.57989	0.018857		A_55_P2040011	Itga7	2.18153	0.000160148		A_55_P1988975	Ms4a4b	11.8673	0.00095523
A_55_P2140002	Tnfaip8	3.75725	0.00039555		A_55_P2066458	Scgb2b21	-2.55166	0.0128565		A_55_P2039881	42983	2.15224	0.0445496		A_55_P1988844	Klrg1	4.23843	0.0175056
A_55_P2139937	Lrrc56	-2.00525	1.59147e-05		A_55_P2066453		2.45978	0.0102745		A_55_P2039699	Camp	2.24493	0.00772879		A_55_P1988804	Stom	-2.06911	0.0437737
A_55_P2139910		-2.45384	0.00190802		A_55_P2066329	Med28	2.46416	0.0124297		A_55_P2039416	Sgk1	4.30499	0.0221979		A_55_P1988481		3.73646	6.89147e-05
A_55_P2139814	Fgf13	2.4656	0.0163222		A_55_P2066234	Arfip2	2.01535	0.0158343		A_55_P2039404	D930007P13Rik	-2.47787	0.0280223		A_55_P1988260		-2.20269	0.00595088
A_55_P2139799		-2.90037	3.73667e-05		A_55_P2066230	Hck	3.68694	0.0194226		A_55_P2039284	Hspb1	-2.075	0.0435842		A_55_P1988246		2.64373	0.0015918
A_55_P2139402	Amy2a5	-3.01939	0.000291831		A_55_P2066219	Gm3455	12.9379	0.0462349		A_55_P2039210	Cpt1b	2.16148	0.0226413		A_55_P1988228	Aspm	4.63364	0.016498
A_55_P2139276	Tbpl2	-3.01362	3.83436e-05		A_55_P2066207		-2.07783	0.00122481		A_55_P2039086	Nfkbiz	3.55488	0.00966466		A_55_P1988202	Ifi203	2.23251	0.0121053
A_55_P2139236	A730020M07Rik	-3.53156	6.38296e-05		A_55_P2066116	Bcl3	3.80579	0.0045163		A_55_P2039071	Dhdh	-2.05323	0.0284007		A_55_P1988108	Mrc1	2.48079	0.0108333
A_55_P2139201	Hmgcll1	-2.38962	0.00015152		A_55_P2066103	Hoxa9	2.63899	0.00700208		A_55_P2039044	Cyp3a59	-8.18061	0.00102288		A_55_P1987730	Fam213a	-2.56128	9.57025e-05
A_55_P2139191	Olfr1036	3.67063	0.0358095		A_55_P2065965		-2.6889	0.00684873		A_55_P2038770	Fam49a	2.35716	0.0241902		A_55_P1987494	Gabrr2	-2.19749	0.0002205
A_55_P2139092	Gm5585	-3.65265	0.0226089		A_55_P2065661	Zfp109	-2.14421	0.00303004		A_55_P2038747	Ano1	2.82278	0.0328983		A_55_P1987406		6.95534	0.0158344
A_55_P2139089	Slc22a28	-3.30254	0.000731124		A_55_P2065567	Chac2	-2.28643	0.000726801		A_55_P2038452		4.14203	0.00035159		A_55_P1987196	Gm3448	2.13197	0.0188203
A_55_P2139087	Slc22a28	-6.46109	0.00042272		A_55_P2065442		2.76407	0.00869311		A_55_P2038384	Prkd3	-2.47362	0.0103174		A_55_P1987156	Crhr2	-2.65483	0.00372738
A_55_P2139069	Fam38b	-2.32404	0.000998141		A_55_P2065249	Mrpl47	-2.04347	0.00800105		A_55_P2038372	Acot6	5.14948	0.00191632		A_55_P1986900	Dll1	-8.18521	0.00264127
A_55_P2138966	Nab2	-4.12145	0.0149998		A_55_P2065231	Gstm3	-2.73233	0.00614943		A_55_P2038303		2.07339	0.0126514		A_55_P1986703	1700055N04Rik	-2.03683	0.0370804
A_55_P2138960	Tpk1	-2.88615	8.68901e-05		A_55_P2064984	Cenpi	2.22909	0.0394662		A_55_P2038152	Sowaha	3.19361	0.00163848		A_55_P1986630		3.65585	0.00241656
A_55_P2138921		-2.31886	0.00496261		A_55_P2064976	4930528A17Rik	3.14393	0.00754783		A_55_P2038101	Dock11	2.72163	0.0074833		A_55_P1986591	Cacna1h	-2.24217	0.00689865
A_55_P2138856	Gm1698	2.36485	0.000219326		A_55_P2064969		-2.1299	0.00185265		A_55_P2038013	Trpm8	-2.05261	0.0239577		A_55_P1986551	Mcam	2.2015	0.0422511
A_55_P2138841	Rfx3	-2.65044	0.0205366		A_55_P2064913	Defa3	-2.32476	0.0400927		A_55_P2038007	Csrp1	2.0757	0.0106325		A_55_P1986531	AU023871	2.34616	0.0256059
A_55_P2138816	Mplkip	-2.06023	0.00785017		A_55_P2064831	Gm10561	-2.39649	0.0165514		A_55_P2037962	Trpm6	2.86962	0.0305577		A_55_P1986426	G6b	-2.72951	0.011834
A_55_P2138792	Fdx1	-3.2337	0.000180546		A_55_P2064776	4930412O13Rik	-2.09104	0.00275873		A_55_P2037930		2.34063	0.0035853		A_55_P1986341	Gm4956	-22.1795	0.000737144
A_55_P2138591	Cyb5rl	-2.01954	0.0139201		A_55_P2064771	Ly6c1	5.34154	0.00023704		A_55_P2037827	Bmp10	2.86386	0.0234269		A_55_P1986228		2.00755	0.0200971
A_55_P2138457	Olfr523	-3.24045	0.0453333		A_55_P2064747		-2.41244	0.000675225		A_55_P2037797	1700019O17Rik	-2.2092	0.0018223		A_55_P1985984	Actg1	2.08505	0.00766671
A_55_P2138432	Gm10388	-2.12271	0.0318413		A_55_P2064721	4921534A09Rik	-2.58565	0.0139389		A_55_P2037787		-3.99756	0.0157469		A_55_P1985911	Nkx2-2	-2.28403	0.00297617
A_55_P2138422	Obox1	4.14687	0.005605		A_55_P2064333	Lama3	-21.7434	0.000126275		A_55_P2037717	Slc22a18	-2.30134	0.00297967		A_55_P1985890	Tiparp	3.79909	0.000356896
A_55_P2138343	Ndufaf5	-2.3146	0.0364633		A_55_P2064267	Olfr1255	-2.35657	0.000975024		A_55_P2037707	Gm10638	-2.79688	0.0299092		A_55_P1985693	Fhdc1	2.21793	0.0222487
A_55_P2138333	Mad2l1	3.3015	0.0172618		A_55_P2064043	Cd44	3.31862	0.00789072		A_55_P2037702	Gm10638	2.20126	0.00391731		A_55_P1985633	Lrp1	7.25738	0.0187439
A_55_P2138306		2.12368	0.0201539		A_55_P2063776	Gm2568	-2.44709	0.0132175		A_55_P2037697	Gm9733	5.77561	0.0017643		A_55_P1985510	Gm9839	-2.81133	0.0290964
A_55_P2138281		2.6925	0.00983438		A_55_P2063770	Nat3	-5.39122	0.0196796		A_55_P2037588		2.99225	0.00411073		A_55_P1985453	Susd3	3.14446	0.0399541
A_55_P2138257	Ube2d2a	-2.15244	4.92202e-06		A_55_P2063761		-2.20338	0.0227171		A_55_P2037162	Esyt1	3.65137	0.0466619		A_55_P1985360	Man1c1	2.36761	0.00502636
A_55_P2138104		3.50029	0.0184861		A_55_P2063654	Mup20	-5.56528	0.00188603		A_55_P2036898	Gm15292	3.96857	0.00971875		A_55_P1985337	Sytl3	10.7755	0.00101039
A_55_P2138100		2.98521	0.0047993		A_55_P2063618	Gm10818	-4.43957	0.0119713		A_55_P2036585	Gm13547	-2.8847	0.00671055		A_55_P1985288	Bhlha9	-3.11945	0.00353161
A_55_P2138065	Stau2	-2.29683	0.0225733		A_55_P2063301		-2.18546	0.00178453		A_55_P2036567	Vav1	5.55655	0.00255572		A_55_P1985189		2.18825	0.0191983
A_55_P2137968		-2.13427	0.0257602		A_55_P2063193		-4.26782	0.0445969		A_55_P2036547	Hsd3b2	-86.4054	0.000174357		A_55_P1985143		2.95223	0.00294023
A_55_P2137932		5.11756	0.0012697		A_55_P2063166	Ogfod1	-2.46171	0.0158229		A_55_P2036460	Synb	2.2002	0.0164447		A_55_P1984976	Wnt5b	2.44843	0.000727523
A_55_P2137927	Cd82	-2.27754	1.29116e-05		A_55_P2063163	Agk	-2.03674	0.00385892		A_55_P2036303	Bdnf	-2.62996	0.00793145		A_55_P1984962		2.48123	0.0130537
A_55_P2137867	Mpp3	3.14062	0.000323587		A_55_P2062991	Tmprss11bnl	-2.22109	0.00141585		A_55_P2036280	Psen2	-2.08379	0.00962757		A_55_P1984961	AV026068	2.95966	0.00422643
A_55_P2137828	Gprc5b	4.79621	0.0114962		A_55_P2062911	Epha5	-2.48594	0.0247418		A_55_P2036240		8.86294	0.000406116		A_55_P1984886	Hcst	5.74155	0.000138015
A_55_P2137745	Srgap3	2.23977	0.00125639		A_55_P2062722		4.17375	0.0257131		A_55_P2036220	Chadl	-4.2984	0.00076608		A_55_P1984830	Fgl1	3.98838	0.00856601
A_55_P2137688	Cga	6.67335	1.61509e-05		A_55_P2062589	Mtnr1a	-14.9918	0.000245154		A_55_P2036180	Mcf2l	5.20505	0.000576495		A_55_P1984755		-2.24629	0.031349
A_55_P2137653		-2.45481	4.45751e-05		A_55_P2062573	C1qtnf3	-7.65779	0.00582133		A_55_P2036022	Gm10615	3.5863	0.00163393		A_55_P1984675	Abhd6	-2.57153	0.00666119
A_55_P2137616	Treml4	3.28675	0.0026782		A_55_P2062513	Pdzrn3	2.51371	0.0179171		A_55_P2035963	Hipk3	2.3398	0.000609206		A_55_P1984645	Gm5434	-2.80478	0.0214833
A_55_P2137611	Irgm2	2.58911	0.00175488		A_55_P2062300	Mettl8	-2.20538	0.0092842		A_55_P2035827	Vma21	-2.0176	0.00213589		A_55_P1984416		9.81299	0.00765348
A_55_P2137557	Gm996	-2.35354	0.000331578		A_55_P2062279	Olfr850	-2.11124	0.00259008		A_55_P2035804	Fzd8	-3.05813	0.000375767		A_55_P1984362		5.84733	0.00132828
A_55_P2137531	Olfr291	-2.38905	0.00014392		A_55_P2062250	Gm5524	-2.98511	0.00250578		A_55_P2035757	Gm8884	9.66831	0.000713417		A_55_P1984243	Naip2	2.06893	0.00926032
A_55_P2137501		-2.48177	9.80963e-05		A_55_P2062246	Tgtp2	7.2065	0.00519071		A_55_P2035653	Ccdc123	-2.38318	0.0335695		A_55_P1984168	Casp4	2.93523	0.00485831
A_55_P2137416		-2.08938	0.015987		A_55_P2062190	Gstm1	-2.66848	0.010791		A_55_P2035623	Zfp473	3.47529	0.00979893		A_55_P1984158	Slc44a2	2.01297	0.000153889
A_55_P2137319		2.80776	0.000717786		A_55_P2062187	Shank1	2.97683	0.00615295		A_55_P2035549	Zfp879	-2.04739	0.0333753		A_55_P1984035	Litaf	2.23731	0.00591705
A_55_P2137211	Tgfbr1	2.82195	0.0341338		A_55_P2062094		3.50406	0.00121355		A_55_P2035539	D3Ertd751e	-3.12809	0.00100048		A_55_P1983921	Crybb3	10.6994	0.000989051
A_55_P2137049	AA467197	8.85533	0.00131128		A_55_P2062024	Tcp11	-9.46348	0.000364301		A_55_P2035424	Hpgd	-2.96094	6.97933e-05		A_55_P1983773	Birc5	2.23512	0.0294665
A_55_P2137001	Hhipl1	3.41299	0.0349109		A_55_P2062021		-3.28383	0.00248558		A_55_P2035315	Rasgef1b	4.85822	0.0100768		A_55_P1983769	Birc5	4.9456	0.00316438
A_55_P2136970		4.8279	0.000262886		A_55_P2061954	Olfr922	-2.48336	0.049594		A_55_P2035087	Arhgef15	3.09052	0.0437999		A_55_P1983768	Birc5	2.01309	0.0124986
A_55_P2136902	Cisd3	-2.03047	0.00279476		A_55_P2061779	Zfp456	2.54583	0.000486776		A_55_P2035038		-2.02945	0.00457703		A_55_P1983523	Cd300ld	3.10313	0.000573964
A_55_P2136890		3.78698	0.00374677		A_55_P2061704	Akd1	-2.32473	0.00213845		A_55_P2035018	Clec4n	5.35602	0.0085414		A_55_P1983450	S100a4	8.71273	0.00263844
A_55_P2136832	Gm6981	-2.08937	0.00197365		A_55_P2061660	Atp8b2	-2.24957	0.00736794		A_55_P2034784	9430008C03Rik	4.85559	0.00090235		A_55_P1983448	S100a4	15.1356	0.0023019
A_55_P2136776	Sult1b1	-12.3307	0.000116429		A_55_P2061432	Scgb2b2	2.30901	0.00232236		A_55_P2034663	Csf2rb2	6.61398	0.0061782		A_55_P1983358	Gm4593	3.48958	0.00103201
A_55_P2136765	Uqcr10	-2.4676	0.000131359		A_55_P2061219	Ces3a	-2.17704	0.0141804		A_55_P2034655		4.61393	0.00376978		A_55_P1983272		2.00719	0.0026683
A_55_P2136763		-2.29366	0.000405013		A_55_P2061104	Mup6	-2.14808	0.018059		A_55_P2034453		-2.02994	0.00180487		A_55_P1983262		-2.08127	0.0465974
A_55_P2136612		-2.0273	0.020055		A_55_P2060983		-2.19046	0.0025889		A_55_P2034300	Tmem40	5.41961	0.000246511		A_55_P1983095	Adam19	3.79098	0.00118651
A_55_P2136581		-3.6721	0.0126321		A_55_P2060931	Gm5627	-2.02684	0.00307943		A_55_P2034227		2.13365	0.00488045		A_55_P1983046	Plch1	3.10093	0.00165341
A_55_P2136373	Cep250	-2.53318	0.000853507		A_55_P2060868		2.59079	0.000139757		A_55_P2034067	Myom3	47.1696	0.000513414		A_55_P1983044	Gm5150	15.3412	0.00746576
A_55_P2136318	Slc1a5	6.03379	0.00416661		A_55_P2060707	Il15ra	-2.24424	0.0284983		A_55_P2034032	Il12rb1	5.21721	0.000554268		A_55_P1982494	1700012L04Rik	-2.32967	0.0143662
A_55_P2135980	Ms4a4c	-2.97589	0.000735727		A_55_P2060630	Stk11ip	2.41695	0.00440265		A_55_P2034027	Nos3	2.05384	0.0214616		A_55_P1982451	Hmgn5	-2.04842	0.0112869
A_55_P2135931		-5.8341	0.0318909		A_55_P2060333	S100a5	2.70165	0.0302958		A_55_P2033720	Olfr331	2.34585	0.0427386		A_55_P1982291	Clca1	5.4673	0.00158597
A_55_P2135880	Fancl	-2.24231	0.00038621		A_55_P2060284	Itpripl2	2.00697	0.0435567		A_55_P2033690	LOC101055644	3.00912	0.0315345		A_55_P1982239	Ctrb1	-2.03623	0.00689204
A_55_P2135750		2.06229	0.010972		A_55_P2060243	Itgbl1	-2.09761	0.0181653		A_55_P2033665		5.64439	0.0048527		A_55_P1982147		-3.39868	0.00676517
A_55_P2135725	C8g	-2.98313	6.982e-05		A_55_P2060138	Cyp2a22	9.4607	0.0358586		A_55_P2033615		-2.31295	0.00825788		A_55_P1982030	H3f3b	2.08722	0.00315815
A_55_P2135701	BC024978	2.0325	1.27408e-05		A_55_P2060130		3.41806	0.024743		A_55_P2033500	Ltbp4	-2.67633	0.000254323		A_55_P1981964	Tnfrsf13b	2.1446	0.00860144
A_55_P2135551	Dnase1l2	2.16543	0.0191522		A_55_P2060107	Pkm	2.33291	0.0478318		A_55_P2033481	Gm13298	2.18228	0.00776163		A_55_P1981929	Scg5	-2.02533	0.0446993
A_55_P2135516	Sh2d7	2.22702	0.0118868		A_55_P2059931	Prom1	10.8704	0.00156604		A_55_P2033393	Slc25a21	-2.36453	0.00294405		A_55_P1981814	Myo3b	-2.10337	0.00345539
A_55_P2135331	Evl	4.69198	0.00120007		A_55_P2059820	Aadat	-2.52809	0.0114215		A_55_P2033326		-23.5573	0.0109061		A_55_P1981804	Gp1ba	3.96139	0.0118726
A_55_P2135291	Gm7276	-2.45593	0.000947238		A_55_P2059640	Abhd14b	-2.23495	0.00257178		A_55_P2033321		-3.34249	0.0473017		A_55_P1981595	Olfr470	-2.2106	0.00442258
A_55_P2135203		-13.7935	0.00122744		A_55_P2059606	Stat2	2.26637	0.00263899		A_55_P2033272	Treh	7.51076	2.46719e-05		A_55_P1981465		-2.36479	0.00426644
A_55_P2135200	Slfn10-ps	2.09194	0.00478013		A_55_P2059586	Fmo3	44.9689	0.00299558		A_55_P2033116	Cdcp2	-2.34845	0.0158598		A_55_P1981455		2.53879	0.0408414
A_55_P2135153	Obp2a	-7.90922	0.00614245		A_55_P2059502	Zkscan16	-2.37965	0.00629004		A_55_P2033055	Pdp1	3.96758	0.0104486		A_55_P1981224	Il24	-2.89223	0.00566198
A_55_P2135039	Hyi	-3.78145	0.00139853		A_55_P2059412	Ghr	-2.21583	0.00621015		A_55_P2033041	Sirpb1b	13.357	0.000736808		A_55_P1981197		-4.00786	0.0450286
A_55_P2134977		-2.74996	0.0113433		A_55_P2059332	Pnkd	-4.02525	0.0032498		A_55_P2032946	Gm3776	-79.7833	0.00682142		A_55_P1981195		-7.03813	0.0228261
A_55_P2134967	Uty	-15.9693	3.97129e-05		A_55_P2059095	Fignl2	-2.00812	0.00103475		A_55_P2032853	Entpd1	4.44091	0.0155809		A_55_P1980796	Il2ra	4.636	0.000527335
A_55_P2134725		-2.61493	0.0498857		A_55_P2058962	Mcm10	-3.93687	0.00028396		A_55_P2032815	Rnase13	3.40251	0.0290258		A_55_P1980621		-2.21263	0.0309238
A_55_P2134715		-2.48561	0.000111275		A_55_P2058881	Gm10560	-2.30139	2.6456e-05		A_55_P2032775		27.5601	0.000217366		A_55_P1980308	Stap1	3.20043	0.000843727
A_55_P2134616	Med12l	10.9353	0.00246033		A_55_P2058851	Fancf	-2.23616	3.65318e-05		A_55_P2032770	Inpp5e	-2.25594	0.0320238		A_55_P1980214		3.34259	0.00570527
A_55_P2134566	Fam71e1	2.07516	0.00120772		A_55_P2058359	H2afy	-2.01825	0.000963613		A_55_P2032760	Ctif	2.22928	0.0014002		A_55_P1980051	Il17d	-2.11874	0.0309607
A_55_P2134452		2.73708	0.000599498		A_55_P2058290	Cluh	-2.11039	0.0020877		A_55_P2032723	Dnajc10	2.0088	0.00295805		A_55_P1979997	1700026L06Rik	2.1876	0.0237033
A_55_P2134351	Lancl3	-2.64835	7.85224e-05		A_55_P2058275		-2.11472	0.00164438		A_55_P2032718	Klra9	2.7514	0.0390656		A_55_P1979986	Crcp	4.07385	0.000142588
A_55_P2134336	Gm7742	-2.64568	0.00011335		A_55_P2057936	Gm12250	2.06499	0.000981914		A_55_P2032659	Tox	2.19234	0.023886		A_55_P1979508	Clic3	-2.64504	0.0178522
A_55_P2134197		-2.38354	0.000140943		A_55_P2057926		-4.53246	0.0125471		A_55_P2032478	Sfxn5	-5.34235	0.000938819		A_55_P1979491	Cd28	15.8089	0.000698554
A_55_P2134004	Gstm2	-3.30813	0.000524598		A_55_P2057877	Pou2f2	4.11448	0.00855251		A_55_P2032440	Gm8378	14.2758	0.00629957		A_55_P1979477		-2.34314	0.0237721
A_55_P2133997	Abca12	-3.04198	1.76345e-05		A_55_P2057806	Clrn2	-2.0419	0.00326529		A_55_P2032419	LOC101056207	8.81548	0.000502571		A_55_P1979364		2.06257	0.0493781
A_55_P2133978	Slc38a8	-3.90025	0.00444389		A_55_P2057761	Olfr971	-2.1359	0.00235737		A_55_P2032388	Trim24	3.17378	0.000257581		A_55_P1979341	Cyba	4.22434	0.000363955
A_55_P2133943	LOC101056066	2.21235	0.0145084		A_55_P2057446	Ccdc134	2.1722	0.0472301		A_55_P2032081	Dbp	-7.28836	0.0336983		A_55_P1979330	Dapp1	4.14568	0.00473311
A_55_P2133933	Tas2r115	-2.69404	0.000378203		A_55_P2057430	Lipn	-2.36118	0.0244149		A_55_P2032079	Dbp	-6.10647	0.0451988		A_55_P1979295	Lrit1	-4.00039	0.00202094
A_55_P2133910	Ttll10	2.55502	0.00362399		A_55_P2057380		2.56713	0.00420116		A_55_P2031999	9030617O03Rik	-2.13416	0.00922732		A_55_P1978932	Slc7a15	6.89367	0.00435883
A_55_P2133756	Olfr1197	-2.45807	0.000158549		A_55_P2057189	1810030J14Rik	-8.72932	0.002701		A_55_P2031949	Bend6	3.62754	0.0122152		A_55_P1978825	Gm10556	-2.89902	0.00375076
A_55_P2133706	Susd5	-6.4605	0.0401554		A_55_P2057132	Scn8a	-2.79458	0.0218153		A_55_P2031692	Gstm6	-8.34476	6.04489e-05		A_55_P1978770	E030018B13Rik	25.9644	0.00830299
A_55_P2133680		-2.6037	0.000142834		A_55_P2057118	Mid1	2.44912	0.00634666		A_55_P2031681	Gstm6	-3.89622	0.00659508		A_55_P1978666	Sybu	26.5368	0.000106956
A_55_P2133646	4922501C03Rik	2.187	0.0170909		A_55_P2056941	Olfr437	-2.23558	0.001318		A_55_P2031676	Gstm6	-8.13468	2.19881e-05		A_55_P1978618	Grcc10	-2.19869	0.00365067
A_55_P2133637	Etfa	-4.80097	5.16524e-06		A_55_P2056719	AF067061	-2.15952	0.00170878		A_55_P2031671	Gstm6	-6.8577	0.00017597		A_55_P1978608		-2.83	0.0136946
A_55_P2133568	Snhg5	-2.24617	0.0135588		A_55_P2056473	Spc24	-3.08714	0.0162906		A_55_P2031668	Gstp1	-2.52975	0.0220409		A_55_P1978521	Gbp10	-2.04543	0.0172223
A_55_P2133546	Ndufaf5	-2.92635	2.10337e-05		A_55_P2056463		-2.53131	0.0160042		A_55_P2031471	Rufy4	2.38322	0.00671183		A_55_P1978502	H2-Q1	-4.52955	0.00182426
A_55_P2133524	Nbr1	-2.01576	5.31563e-05		A_55_P2056280	Wdr89	-2.89556	0.0175191		A_55_P2031288	Abcg5	-3.54493	0.0428997		A_55_P1978424	Bcl2a1d	5.43646	0.00331861
A_55_P2133460	Gm7173	-2.63732	8.04873e-05		A_55_P2056106		-3.09143	0.0111545		A_55_P2031045	Stat5b	-2.26003	0.000172608		A_55_P1978216	AF251705	4.09432	0.000924306
A_55_P2133337	42803	2.32932	0.00243288		A_55_P2055697	Vmn1r51	-2.80057	0.0395782		A_55_P2031043	Stat5b	-2.15863	7.86157e-06		A_55_P1978201	Incenp	2.18861	0.00369386
A_55_P2133310	Steap2	4.17266	8.63396e-06		A_55_P2055652	Gm6927	-2.12378	0.0027611		A_55_P2030883	Esr1	3.82815	0.000394502		A_55_P1978136	Tnip2	2.42173	0.0175961
A_55_P2133248	Gm8995	5.75891	3.55796e-05		A_55_P2055632	Rtfdc1	-2.12716	0.000506123		A_55_P2030717		2.1383	0.000142143		A_55_P1977929	Itgam	3.25379	0.00589747
A_55_P2133225	Mmgt2	3.26362	0.000180028		A_55_P2055597	Enpp2	-2.14767	0.00583482		A_55_P2030660		2.07162	0.0154282		A_55_P1977776	Rs5-8s1	-8.94276	0.0239524
A_55_P2133220	Arhgef39	2.06572	0.015192		A_55_P2055477	Scaf11	-2.05355	0.00107634		A_55_P2030627	6330403A02Rik	-2.73771	0.00493091		A_55_P1977426	Oscar	6.88596	0.000309866
A_55_P2133125	D930015E06Rik	-4.6231	5.51283e-05		A_55_P2055316		-2.39866	0.000851262		A_55_P2030046	Barx2	-2.30172	0.0142764		A_55_P1977245	Slc22a13	2.21754	0.00105112
A_55_P2133032	Kirrel3	2.06268	0.0406222		A_55_P2054942	Iffo2	2.03882	0.0413259		A_55_P2030030	Adssl1	-2.34728	0.0136184		A_55_P1977149	4933426M11Rik	2.01148	0.0227261
A_55_P2132987	Cypt10	-2.02718	0.0330672		A_55_P2054817	Rxfp1	-2.35106	0.0015221		A_55_P2030010	2700046G09Rik	2.36691	0.0390807		A_55_P1977071	Fam110a	-2.44056	0.000153707
A_55_P2132978		3.19656	0.0148324		A_55_P2054728	Ldlrad3	-2.54009	0.0246636		A_55_P2029962		-2.11145	0.016862		A_55_P1977008	Gfi1	4.69946	0.000745588
A_55_P2132952		2.03618	0.0103361		A_55_P2054708		-3.5428	0.0106187		A_55_P2029902	Gab3	-2.18249	0.0283468		A_55_P1976928	Unc13d	2.80738	0.014264
A_55_P2132781	Slc16a2	-2.00584	0.000139638		A_55_P2054511		2.10217	0.000105692		A_55_P2029746		4.98496	4.33015e-05		A_55_P1976898	Pnp2	2.34586	0.0179316
A_55_P2132741	Olfr1164	-2.81577	2.4335e-05		A_55_P2054470	Gm11497	-2.07658	0.00366656		A_55_P2029682	Fry	2.49845	0.00600092		A_55_P1976682	4932431P20Rik	-2.54608	0.0262948
A_55_P2132604	Gm2447	2.73395	0.000213277		A_55_P2054409	Pira2	2.06049	0.0380677		A_55_P2029678	Etfa	-2.12385	0.000825171		A_55_P1976584	Tmod2	-2.45817	0.0289361
A_55_P2132549	Cd48	2.20234	0.0116783		A_55_P2054373	Defa-ps1	-2.76932	0.0403508		A_55_P2029574	Por	3.50617	0.00515435		A_55_P1976297		-2.11524	0.00596663
A_55_P2132536		-5.35877	0.0107666		A_55_P2054372	Gm15299	-2.50355	0.00298996		A_55_P2029558	Adrb2	26.5776	0.00111126		A_55_P1976278	Prkcb	3.63747	0.000847873
A_55_P2132517	Gmppa	2.29826	0.00176103		A_55_P2054342	2810408I11Rik	-2.47844	0.032008		A_55_P2029533	Zfp57	-2.55255	0.00534489		A_55_P1976224	Ckb	2.14777	0.0199165
A_55_P2132512	Ngef	-4.65314	0.0042048		A_55_P2054332	Ephb3	-2.6968	0.0193683		A_55_P2029503	Osbpl1a	-2.00018	0.0239195		A_55_P1976212	Selplg	2.99429	0.00269197
A_55_P2132498	Crb1	-3.01071	2.56624e-05		A_55_P2054256	Mzt2	-2.14963	0.000184753		A_55_P2029420	2610318N02Rik	2.14007	0.0377552		A_55_P1976200	Lmtk3	2.21118	0.0153239
A_55_P2132223	Speer5-ps1	-3.05031	0.0271112		A_55_P2054225	Camsap2	2.61901	0.0449395		A_55_P2029235	Btn1a1	2.32682	0.0480278		A_55_P1975843		3.85914	0.000231641
A_55_P2132202		-2.48943	0.000182558		A_55_P2054107		-2.62744	0.0234563		A_55_P2029101	Lcorl	-3.28658	0.00460479		A_55_P1975560	Ifi204	4.12832	0.00345331
A_55_P2132162	Gm14486	-2.66938	0.00926509		A_55_P2053978	Bdkrb2	-2.08845	0.00280013		A_55_P2029061	Tnfrsf9	3.01596	0.0409769		A_55_P1975546	Gm20736	3.09524	0.0453815
A_55_P2132154	BC061194	-4.43133	0.0488484		A_55_P2053838	Tnfaip3	9.36027	0.0382561		A_55_P2029051	Fgd3	2.58182	0.00206294		A_55_P1975310	Tgif2lx2	5.34936	0.00787564
A_55_P2132129		-4.27608	0.0477189		A_55_P2053714	AA619741	-7.5731	0.00219271		A_55_P2028986		11.9213	0.00797321		A_55_P1975266	Crygf	-4.35996	0.00248849
A_55_P2132128	Gm5532	-2.72306	0.000115507		A_55_P2053561	Gm13011	-2.17217	0.00192682		A_55_P2028883	Rnft2	-2.57103	0.00170015		A_55_P1975185	Sqle	4.19415	0.00198524
A_55_P2132104		-2.5223	8.75329e-05		A_55_P2053467		2.66785	0.03675		A_55_P2028847		-2.12099	0.0110842		A_55_P1975155	Galnt6	4.91179	0.000565778
A_55_P2131979	42795	3.40126	0.000713511		A_55_P2053404	Lilrb3	-2.43125	0.0125987		A_55_P2028798	Nqo2	-5.73706	3.57556e-07		A_55_P1975080	Ugt2b5	-2.84121	0.0029487
A_55_P2131820	A530006G24Rik	-3.76129	0.00147978		A_55_P2053236		-2.19071	0.00138869		A_55_P2028773	Slc22a17	2.74743	0.00113957		A_55_P1974827	Pde1b	2.07934	0.0224459
A_55_P2131725	LOC100045026	-2.30275	0.000159467		A_55_P2053097	Myo9a	3.64842	0.00694401		A_55_P2028570	Sgsh	2.1164	0.0345518		A_55_P1974577	Nfam1	4.50926	0.000260359
A_55_P2131719		2.19472	0.0269559		A_55_P2053004	Gm10474	-4.8633	0.0195401		A_55_P2028504	LOC100862497	-2.72964	0.0322043		A_55_P1974487	Atp8b5	-5.26968	4.95119e-05
A_55_P2131707	Lpcat1	2.94275	0.0406864		A_55_P2052939	Dyrk2	-3.07571	0.00233902		A_55_P2028268	Pik3cd	8.44845	0.008322		A_55_P1974452	Lime1	2.27965	0.0264798
A_55_P2131683	Mical2	2.03655	0.00240552		A_55_P2052897	Arhgap30	3.02107	0.0262326		A_55_P2028259	Rhbdf2	2.94307	0.00113617		A_55_P1974432	Gm5067	2.6036	0.00822459
A_55_P2131663		-2.68774	5.81673e-05		A_55_P2052862	Fam73a	2.36274	0.0120334		A_55_P2028243	Dnajc19	3.383	0.0439929		A_55_P1974098		-2.69506	0.002713
A_55_P2131642	Trim50	-2.79512	0.0133939		A_55_P2052853		3.52552	0.000782008		A_55_P2028159	3110043O21Rik	2.76863	0.00337188		A_55_P1973995	Gm6756	5.98509	0.00150006
A_55_P2131637	Trim40	-2.24392	0.0062273		A_55_P2052834	Lst1	2.65266	0.0198436		A_55_P2028046	Cyp3a59	-11.6852	0.000567673		A_55_P1973854	Sema6b	2.70775	0.0298035
A_55_P2131453	Otogl	-2.62813	5.36697e-05		A_55_P2052824	Lrrc14b	-3.43973	0.0056146		A_55_P2028029	Abcb11	-5.44327	0.000204839		A_55_P1973848	Sema4b	3.28623	0.00358331
A_55_P2131452		-2.19373	0.0124064		A_55_P2052696	Synm	3.38595	0.00440031		A_55_P2027999	Hk1	2.15448	0.00554547		A_55_P1973844	Sema5b	-2.59859	0.0440688
A_55_P2131428	Tlr5	-2.77754	0.00130095		A_55_P2052690	Synm	3.16522	0.000399613		A_55_P2027979	Impg2	-3.92999	0.000651907		A_55_P1973813		-3.31811	0.00101628
A_55_P2131423		-2.62313	3.14252e-05		A_55_P2052655	Sox21	-2.34665	0.00118377		A_55_P2027852	Ccl25	-2.56039	0.0133995		A_55_P1973809	Hbb-b1	-2.45624	0.0221683
A_55_P2131328		-2.63362	0.0282394		A_55_P2052555	Dpysl5	-2.09241	0.0468889		A_55_P2027708	5830416P10Rik	-3.00885	2.65052e-05		A_55_P1973698	Htra2	-2.94353	0.00153238
A_55_P2131325	Gm10785	2.2573	0.00194204		A_55_P2052416	Iqsec1	-2.46467	0.034541		A_55_P2027698	Ndufa5	-2.10178	0.00334845		A_55_P1973553	Bbs12	2.23528	0.0158171
A_55_P2131274	Zfp663	3.00603	0.00194993		A_55_P2052325	Hyal6	-2.56064	0.0133555		A_55_P2027653	Arhgap25	2.8411	0.00271023		A_55_P1973501	Ceacam16	3.60084	0.00190322
A_55_P2131238	Ttc39a	5.77138	0.00280453		A_55_P2052056	A3galt2	3.17642	0.0176572		A_55_P2027496	Adck5	-2.25412	0.0361059		A_55_P1973447	Ybx2	-3.34581	0.0373127
A_55_P2131078		-4.01441	0.0197634		A_55_P2051904	LOC101055666	-2.21777	0.00221236		A_55_P2027337		-2.9972	0.00177652		A_55_P1973352	Gm19958	6.64275	0.00583929
A_55_P2131060	LOC101055780	2.14657	0.00213323		A_55_P2051879	Ccdc171	-2.59999	0.0267247		A_55_P2027278	Gas2l1	2.18356	0.0010969		A_55_P1973259	Gamt	-3.10507	0.0323297
A_55_P2130997	D830050J10Rik	-3.06552	0.0367291		A_55_P2051849	Snap25	2.5578	0.0221062		A_55_P2027087	Plcl1	2.71644	0.0262313		A_55_P1973254	Cmtm7	3.26389	0.00208393
A_55_P2130885	Mas1	-5.66713	0.0139982		A_55_P2051666	Nfkbib	3.00758	0.0407887		A_55_P2026959		-3.29303	0.00105273		A_55_P1973213	Trmt61a	2.09491	0.00430961
A_55_P2130792	Tuft1	-2.01991	0.0419759		A_55_P2051656	Shank2	-4.04926	0.00908975		A_55_P2026530	Erc2	-2.99385	0.000151261		A_55_P1973046	Cttnbp2nl	3.17248	0.0102552
A_55_P2130695	Armc4	-2.47091	0.00017774		A_55_P2051525		-2.06156	0.00270715		A_55_P2026340	Fmo5	-3.19644	0.000387099		A_55_P1972973		-3.12566	0.0194541
A_55_P2130565	Prdm11	2.37824	0.000119572		A_55_P2051414	Axl	2.25046	0.0179198		A_55_P2026295	Syne1	-2.74523	0.00258875		A_55_P1972772	Gsg1	5.01866	0.00243091
A_55_P2130525	Arl14ep	2.96953	0.00907093		A_55_P2051367	AA066038	-4.05514	0.00865995		A_55_P2026275	Ppp1r1b	-2.98308	0.000884037		A_55_P1972605	Adora3	4.04725	0.000471152
A_55_P2130478	Sdr16c6	-3.80878	0.0292357		A_55_P2051322	Efhd2	2.71216	0.00747051		A_55_P2026139	Nxpe5	4.96017	0.0411369		A_55_P1972436	Themis	5.56616	0.021625
A_55_P2130408		4.77236	0.0494171		A_55_P2051270	Tctex1d1	-2.33208	0.000871495		A_55_P2025954	Acly	-2.44745	0.00233305		A_55_P1972282		-2.62852	0.00603579
A_55_P2130399	Rilp	-3.29835	0.000207897		A_55_P2051254	Pvt1	-4.38387	0.00290866		A_55_P2025937		7.29745	0.00675124		A_55_P1972040	Nox4	-3.28597	0.0253319
A_55_P2130393	Pnpla1	-3.05037	0.0196875		A_55_P2051139	Zfp704	2.02621	0.0111944		A_55_P2025911	Sms	-2.08941	0.0087921		A_55_P1972039	Nox4	-3.38113	0.0279739
A_55_P2130388	Mical1	2.10872	0.00345266		A_55_P2050997	Serinc4	2.20933	0.0114631		A_55_P2025829		2.07661	0.00298413		A_55_P1972001	Gm324	-2.86684	0.000280617
A_55_P2130365	Nup93	-2.98501	5.15217e-05		A_55_P2050754	Cd209c	-2.09527	0.00331416		A_55_P2025765	Adam8	8.50085	0.00234982		A_55_P1971963	Tmem176b	2.15981	0.00128592
A_55_P2130343	Gm18756	-2.75329	0.000118159		A_55_P2050652	Ikbkg	-2.02238	0.00257371		A_55_P2025730	Hif3a	6.19862	0.000265538		A_55_P1971962	Tmem176b	2.86427	0.00265185
A_55_P2130283	Nkain3	-2.56455	9.57778e-05		A_55_P2050602	Ncam1	2.16574	0.0158257		A_55_P2025687	Muc4	7.74633	0.000240977		A_55_P1971951	Cd86	2.69207	0.00473393
A_55_P2130243	Sh3gl2	-2.70295	7.12962e-05		A_55_P2050488	Cep170b	-2.50959	0.0219673		A_55_P2025655		-2.79724	0.0350283		A_55_P1971889	F3	-2.21293	0.0184651
A_55_P2130208		-2.74708	0.00017578		A_55_P2050273	Cct6b	-2.03152	0.000231175		A_55_P2025523	Arhgap6	-5.25877	4.47571e-05		A_55_P1971729	Cr2	3.75321	0.0144352
A_55_P2130194	Zbbx	-2.38651	0.000114467		A_55_P2050268	Nfkbid	2.52646	0.025555		A_55_P2025343	Mup21	-54.9661	0.000674762		A_55_P1971614		-2.41448	0.0328161
A_55_P2130144	Lingo1	-2.45792	0.000108072		A_55_P2050218	Elf4	-2.39249	0.000658885		A_55_P2025340	Olfr1276	-2.31392	0.0156997		A_55_P1971237	Mup3	-2.42602	0.0462082
A_55_P2129925	Mybl2	3.22229	0.0443341		A_55_P2050178		-2.21827	0.00251545		A_55_P2025248	Mxd1	2.38775	0.00608355		A_55_P1971076	Atp11a	10.415	7.60334e-05
A_55_P2129761	Prrt3	3.02076	0.0139334		A_55_P2050073		-4.13996	0.000296352		A_55_P2025078	Csf1r	4.11811	0.00340779		A_55_P1971074	Atp11a	9.03404	0.000252937
A_55_P2129696	Smad9	-4.24881	0.00322598		A_55_P2049913		3.38036	0.0175131		A_55_P2025038	Cpe	2.49953	0.00532112		A_55_P1970954	Pknox2	-2.15409	0.0209953
A_55_P2129614	Itprip	3.28476	0.0077772		A_55_P2049801	Gm10629	2.67772	0.0192363		A_55_P2025006	Klk1b26	-16.7738	0.0013476		A_55_P1970763	Pilrb2	2.36058	0.0263189
A_55_P2129548		3.68629	0.00376445		A_55_P2049797	LOC100040235	-3.32946	0.0113477		A_55_P2024888	Ctss	7.27131	0.000482116		A_55_P1970755	Hdac9	3.71352	0.0372262
A_55_P2129498	Gm5712	3.17381	0.00149111		A_55_P2049771		2.56633	0.00591486		A_55_P2024841	Gstt1	-8.97429	0.000132941		A_55_P1970597	Actg1	2.20256	0.0123742
A_55_P2129493	Spata3	-2.49785	9.62677e-05		A_55_P2049602	Kat2a	2.00981	0.0134487		A_55_P2024763	Lama3	-2.60043	0.00194861		A_55_P1970596		2.24872	0.00862018
A_55_P2129449	Sult3a1	134.942	2.87088e-05		A_55_P2049567	Pld2	2.31052	0.0208498		A_55_P2024704	Cpe	2.58358	0.0157954		A_55_P1970033	Per1	2.89744	0.0344183
A_55_P2129402	Gm9736	3.67515	0.000253592		A_55_P2049532		2.98467	0.0219597		A_55_P2024679	Gm10765	-3.82003	2.00898e-07		A_55_P1969776	Pdhb	-2.05501	0.00285953
A_55_P2129354	Pilra	3.96199	0.000350424		A_55_P2049252		-3.01924	0.0193925		A_55_P2024649	Rpe	-2.05584	0.000204976		A_55_P1969746	Pitpnm1	2.15666	0.00339513
A_55_P2129348	Pilra	9.12545	0.000143448		A_55_P2049045	AW557046	-2.39484	0.00870015		A_55_P2024625	Gm1987	2.10924	0.0421842		A_55_P1969745	Pitpnm1	2.28117	0.00100691
A_55_P2129330		-2.21707	0.0414732		A_55_P2048975		3.82421	0.0443861		A_55_P2024595	Atxn7l1	-2.53557	0.00157355		A_55_P1969650	Rasgrp1	4.68355	0.000437798
A_55_P2129309	Foxo3	-4.26261	0.00232586		A_55_P2048961	Rbmy	-3.95165	0.0306699		A_55_P2024366	Raver2	3.68421	0.0066357		A_55_P1968958	Cycs	-3.14393	0.00749705
A_55_P2129222	Gbe1	-2.13371	0.00571202		A_55_P2048779	Fam84b	2.90684	0.00670984		A_55_P2024302	Spin1	2.3363	0.00052666		A_55_P1968878	Rhpn2	-2.14233	0.0038986
A_55_P2129057		-2.30495	0.000120848		A_55_P2048550	Hbb-bh2	-2.09682	0.00606101		A_55_P2024290	Fam149a	-6.20436	4.38448e-05		A_55_P1968858	Cadps	-2.48312	0.0305471
A_55_P2129047	Tlr7	2.16269	0.0239119		A_55_P2048505	Gm3985	-2.4503	0.00700617		A_55_P2024245	Mthfr	2.55122	0.0111768		A_55_P1968763	Shc4	-2.0526	0.000482054
A_55_P2128853	Ear12	4.43522	0.00810141		A_55_P2048483	D17Zt10e	2.41064	0.0302508		A_55_P2024054	Slc16a5	8.46408	0.00569863		A_55_P1968703	Gfra2	7.68147	0.00167158
A_55_P2128714	Nmnat3	-2.42442	0.0247719		A_55_P2048363		-2.09006	0.00312058		A_55_P2024046	Slc16a5	10.0259	0.00311474		A_55_P1968433	Agpat9	2.6388	0.010106
A_55_P2128672	Ikbip	2.02589	0.0221976		A_55_P2048334	Ubr3	-2.00073	0.0048865		A_55_P2023988		-2.86639	0.0451785		A_55_P1968028	Tdgf1	-2.31969	0.000147746
A_55_P2128668	Ccnb1	3.32291	0.000267241		A_55_P2048279	Tlr13	2.67568	0.0264803		A_55_P2023942	Ccdc77	-2.23336	0.000351714		A_55_P1967978	Nfatc2	3.19299	0.00370109
A_55_P2128646	Gmnn	-2.28082	0.000320463		A_55_P2048101		-2.43157	0.000880571		A_55_P2023912		3.59938	0.0131244		A_55_P1967829	Klc3	-2.13623	0.0100493
A_55_P2128611		2.53585	0.000740981		A_55_P2047912	Dad1	2.84204	0.0214395		A_55_P2023772	Fam107b	-2.30239	0.0139311		A_55_P1967534		-2.39385	0.00122977
A_55_P2128606	Nr1h5	-3.77068	0.00470523		A_55_P2047837		-2.09844	0.0376166		A_55_P2023692	Neurl1a	3.13869	0.00397906		A_55_P1967443		4.85298	0.0158267
A_55_P2128511	Ociad2	-5.87972	8.47015e-05		A_55_P2047740	Spag17	-2.09216	0.00304377		A_55_P2023637	Prg4	5.32817	0.00106286		A_55_P1967315	Ppp1r9b	2.08571	0.00108881
A_55_P2128493		-2.2631	4.09631e-05		A_55_P2047723	Trav12-1	-2.39801	0.000780345		A_55_P2023607	Ikzf1	4.91509	0.0311652		A_55_P1967301	Zfp85-rs1	-2.38879	0.0212096
A_55_P2128456		5.14821	0.00178534		A_55_P2047559	Ccp110	2.55183	0.00674334		A_55_P2023572	Txn2	2.48872	0.00294341		A_55_P1967227	Tmem158	-2.09613	0.000503173
A_55_P2128324	Ubap2l	2.0556	0.00042226		A_55_P2047554		-2.04759	0.00300963		A_55_P2023542	Ccr7	-2.93458	0.0121995		A_55_P1967224		-2.06689	0.00707766
A_55_P2128283	Nr2f2	-2.2613	0.000119584		A_55_P2047496		-2.19947	0.00213564		A_55_P2023537		-2.4228	0.0152991		A_55_P1966833	Xaf1	4.18309	0.000760065
A_55_P2128270	Phf21a	2.40693	0.000594399		A_55_P2047485		-2.27167	0.00185753		A_55_P2023523	Aloxe3	5.19241	0.00393285		A_55_P1966774	Serpina3i	11.9255	0.00522329
A_55_P2128213		-2.36916	0.00179672		A_55_P2047480		-2.02667	0.000995075		A_55_P2023200	Miox	15.5186	0.000805929		A_55_P1966731	Ifi203	2.60009	0.00471698
A_55_P2128203		12.5839	0.00244423		A_55_P2047335	Capn5	-3.3534	0.00121657		A_55_P2023191	Polg2	-2.28383	0.023034		A_55_P1966664	Cdc14b	-2.05408	0.0203554
A_55_P2128188	Adam17	2.29916	0.011268		A_55_P2047330	AB099516	-3.25364	0.0199282		A_55_P2023176		3.70403	0.00715546		A_55_P1966608		4.72681	0.000150219
A_55_P2128148	D830031N03Rik	2.69728	0.00161541		A_55_P2047285	Lcn6	4.60886	0.011203		A_55_P2023114	Hsd3b2	-59.3939	3.51392e-05		A_55_P1966432	Gstm1	-4.01271	0.00247682
A_55_P2128108	5830411N06Rik	-5.02379	0.0134695		A_55_P2047200		2.94492	0.0264066		A_55_P2023001	Slc47a1	-3.10565	0.000231348		A_55_P1966194	Plek	6.31776	0.0011867
A_55_P2128085	LOC674321	-2.74877	7.85435e-05		A_55_P2047027	Sel1l2	-3.7768	0.000570054		A_55_P2022703	1700086O06Rik	7.25348	0.000880925		A_55_P1965906	Gm9999	-2.52203	0.0452894
A_55_P2127991	Ccl19	2.73094	0.000709052		A_55_P2046783	Mpped1	2.06963	0.0214164		A_55_P2022585	Pira6	5.76412	0.00128179		A_55_P1965836	Crebbp	3.63372	0.00552451
A_55_P2127973	Gm9112	-2.45115	0.00012231		A_55_P2046760	Vmn2r42	-3.93222	0.0131584		A_55_P2022419	D030018L15Rik	4.4093	0.0209876		A_55_P1965574	BC048546	3.22678	0.0010751
A_55_P2127795	Fbxo17	-2.79036	3.46974e-05		A_55_P2046744	Cspg5	-4.76142	0.018901		A_55_P2022211	Plxdc2	2.84246	4.4991e-05		A_55_P1965219	Syt6	-2.53779	0.00677316
A_55_P2127782		-2.00792	0.000916398		A_55_P2046671		-2.18628	0.0474553		A_55_P2022139	Pura	-2.03367	0.0129735		A_55_P1965154	Spc25	-3.29702	0.00973765
A_55_P2127765	Crp	2.29587	0.000111052		A_55_P2046494	Zfand4	-2.03693	0.00033712		A_55_P2022128	Cntnap1	10.2865	0.00364637		A_55_P1964960	Il33	2.71795	2.89689e-06
A_55_P2127717		2.0947	0.00271363		A_55_P2046273	Olfr352	-2.65673	0.0468256		A_55_P2022024	Olfr212	-3.04778	0.0261866		A_55_P1964737		2.60915	8.59898e-05
A_55_P2127702	Racgap1	2.06818	0.0126481		A_55_P2046253	Tmem239	-2.57662	0.024588		A_55_P2021923	Fkbp1a	-2.12517	0.00514973		A_55_P1964717	Gm10398	15.9645	0.00398233
A_55_P2127699	Pira2	2.85535	0.00217335		A_55_P2046220	Olfr740	2.27352	0.00113071		A_55_P2021689	Chrdl2	8.13141	0.00289261		A_55_P1964648	Btla	6.04829	0.00417407
A_55_P2127692	Timm50	-2.30386	0.000241123		A_55_P2046184	Ccdc90b	-2.08796	0.0016723		A_55_P2021565	Ntf3	19.6195	0.00153934		A_55_P1964638	Cxadr	-2.0762	0.00838325
A_55_P2127672	Acsbg1	10.9718	0.00139295		A_55_P2046145	Gm10693	2.42174	0.00646862		A_55_P2021505	Adra2a	13.8669	0.0127429		A_55_P1964573	Arhgef6	2.39656	0.000752977
A_55_P2127387	Olfr1023	-2.6207	8.28365e-05		A_55_P2046123		-2.61616	0.000929474		A_55_P2021490	Gm16386	-2.47859	0.00403188		A_55_P1964483	Cyp2c37	-2.0771	0.0245151
A_55_P2127254		-2.91468	3.55297e-05		A_55_P2046045	Gm805	-2.48972	0.00330871		A_55_P2021398		-2.10862	0.015098		A_55_P1964413	Olfr854	3.77843	0.000115842
A_55_P2127238	Phc3	2.99065	0.00799857		A_55_P2045928	Btnl10	2.53711	0.0277289		A_55_P2021177	Abca2	-3.68012	0.0239912		A_55_P1964348	Gdpd2	3.38804	0.00663767
A_55_P2127199		-3.40623	0.00272856		A_55_P2045891	Cpeb2	-2.57071	0.00421316		A_55_P2021114	Ier5	2.04695	0.00178187		A_55_P1963960	LOC101056540	11.7976	0.00311359
A_55_P2127179		3.79465	0.0266766		A_55_P2045859		-2.94089	0.00124492		A_55_P2021109	Ier5	2.44123	0.00251114		A_55_P1963920	Scimp	2.59662	0.00409233
A_55_P2127030	Olfr820	-2.76197	3.27208e-05		A_55_P2045812	Sigmar1	-2.45717	0.00106766		A_55_P2021049	Ugp2	-3.09393	0.00323073		A_55_P1963712	Cyb5b	-2.24132	0.0176355
A_55_P2126951	Zfp467	-4.67964	0.00196242		A_55_P2045741	Fyb	2.24238	0.0189358		A_55_P2020592	Trim3	2.21701	0.0411566		A_55_P1963508	Slc13a5	51.4697	0.000119772
A_55_P2126950	Zfp467	-4.4748	0.000880357		A_55_P2045697	Sirt7	-2.36371	0.000305212		A_55_P2020577	Pcolce	-2.42097	0.000548113		A_55_P1963454	Cenpq	-2.33711	0.0281559
A_55_P2126870	Nsf	3.50211	0.00552884		A_55_P2045632		2.07697	0.00248278		A_55_P2020572	Psme3	2.97315	0.0497566		A_55_P1963419		-2.40609	0.0168511
A_55_P2126821		-4.21692	0.0183524		A_55_P2045622	Setdb2	-2.46943	0.00309064		A_55_P2020532	BC089491	5.89088	0.00243001		A_55_P1963175	Lctl	-3.65834	0.022716
A_55_P2126820	Gm5800	3.24843	0.0129823		A_55_P2045535	Rsg1	2.06184	0.0179821		A_55_P2020497	Dcaf12l1	-2.9072	0.000192379		A_55_P1963134		-9.77653	0.035356
A_55_P2126814		-2.9694	5.12433e-06		A_55_P2045163	Ehmt1	-2.48614	0.049309		A_55_P2020477	Cyp2c50	-10.2972	0.00596199		A_55_P1963017	Stfa1	10.0269	0.0023877
A_55_P2126790	1500009L16Rik	-2.43201	0.000150159		A_55_P2044972	Zfp74	-3.78487	0.0113191		A_55_P2020378	Ehd4	2.16461	0.00984395		A_55_P1963002	Ppfia4	2.00244	0.00485934
A_55_P2126775	Gfpt1	4.67862	0.00470525		A_55_P2044932	Gpr84	4.52471	0.00308542		A_55_P2020128	Dhrs3	-3.38582	0.00157439		A_55_P1962946	Syk	3.87734	0.000222886
A_55_P2126695	Gm5792	2.6051	0.0330846		A_55_P2044808		-2.4791	0.0149881		A_55_P2020035		-2.15792	0.0108754		A_55_P1962937	Trem2	6.57924	0.000551954
A_55_P2126676		-2.7326	0.00162667		A_55_P2044717	Ccdc171	-2.22549	0.00964482		A_55_P2019989		-4.03646	0.0258178		A_55_P1962861	Dio3os	-2.46681	0.0183232
A_55_P2126652		-2.32539	0.000154122		A_55_P2044369	Hs2st1	-2.94337	0.0236496		A_55_P2019833		-2.05558	0.0239604		A_55_P1962771	Cyfip2	3.44905	0.00214306
A_55_P2126601	Nceh1	-2.57878	6.59494e-05		A_55_P2044364	Mms22l	-2.67409	0.0216577		A_55_P2019751	Paox	-2.68645	1.00655e-05		A_55_P1962766	Fam131c	2.24899	0.0192657
A_55_P2126572	Tmem25	-2.15003	0.0196075		A_55_P2044242	Slc13a5	15.5049	0.00608482		A_55_P2019719	Oas2	9.56057	0.000205408		A_55_P1962661	Cyp2c67	-2.43002	0.00383814
A_55_P2126444	1810032O08Rik	3.91839	0.0080616		A_55_P2044187		2.12233	0.0233521		A_55_P2019577	1500011B03Rik	3.41637	0.00560842		A_55_P1962646		-2.00917	0.0327542
A_55_P2126423		5.02939	0.000410852		A_55_P2043872	LOC637516	-2.10602	0.00283149		A_55_P2019557	Mrgpra2b	5.48336	0.0200905		A_55_P1962621	Chi3l7	3.27906	0.0307474
A_55_P2126391	Srl	-5.37372	0.0103555		A_55_P2043842	Ankmy1	-3.44885	0.00165021		A_55_P2019520	Cma2	-3.03519	0.00489212		A_55_P1962516	Fam19a2	4.0886	0.00791249
A_55_P2126363	Wnt10b	-3.01164	4.02557e-05		A_55_P2043718	Cacna1f	4.89727	0.00503316		A_55_P2019203	Spire1	2.22243	0.026177		A_55_P1962400	Il1rn	13.0209	0.0130728
A_55_P2126333	Cyp2a12	-2.42552	9.25786e-05		A_55_P2043627	Fam89a	-2.84939	0.00941967		A_55_P2019054	Acacb	-2.74477	0.00197567		A_55_P1962305	Plac8	2.1648	0.00201313
A_55_P2126281		2.1754	0.00116876		A_55_P2043587	Gm10802	-2.54614	0.0371895		A_55_P2018934	Emr1	3.25619	0.0479215		A_55_P1962304	Plac8	3.83822	0.00131216
A_55_P2126188	Mamstr	3.92693	0.0305959		A_55_P2043549	1700034H15Rik	-2.84315	0.0291447		A_55_P2018666	Thrsp	-19.3284	0.000973387		A_55_P1962303	Hba-a1	-2.65822	0.00784252
A_55_P2126033	Pik3cg	2.53885	0.00220964		A_55_P2043367	Apol9a	2.46827	0.00666991		A_55_P2018636	9530077C05Rik	14.3066	0.00165325		A_55_P1962299	Hba-a2	-3.3347	0.00377953
A_55_P2126002		-3.29734	0.00480682		A_55_P2043297	Rag1	-2.62108	0.00250387		A_55_P2018594		-3.95925	0.00571433		A_55_P1962284	Klhl24	-2.34612	0.00198625
A_55_P2125907	Gm21064	-11.9181	0.000286876		A_55_P2043207	Magef1	-2.27172	0.0061742		A_55_P2018549	Gcsh	-2.15328	0.000112225		A_55_P1962209	Cxcr6	3.8082	0.00316572
A_55_P2125862		2.25252	0.0405224		A_55_P2043187	Exosc9	-2.55441	0.0210331		A_55_P2018482	Adh5	-2.02892	0.00154199		A_55_P1962011	Clec1b	3.99927	0.00188492
A_55_P2125831		-2.32599	0.000188141		A_55_P2043182	Gimap6	2.06579	0.00930492		A_55_P2018457	Hdac7	2.61454	0.00118675		A_55_P1962010	Clec1b	3.66329	0.00297339
A_55_P2125774	Ola1	-2.40232	1.28767e-06		A_55_P2043122	Arsg	-3.01822	0.00268748		A_55_P2018330	Gm13298	2.0444	0.037891		A_55_P1961993	Cryl1	-3.07224	0.00883466
A_55_P2125766	Ola1	-2.8714	0.000116836		A_55_P2043083	Cyp4a12a	-232.733	0.000446491		A_55_P2018249	Lmo4	2.50486	0.00128204		A_55_P1961943	Cd68	2.92097	0.0038383
A_55_P2125643		-2.02947	0.00296163		A_55_P2042993	Arl6ip6	-2.51602	0.022349		A_55_P2017982	Pde8b	-2.03595	0.0264463		A_55_P1961799		-5.55942	0.0294129
A_55_P2125633	Acbd5	-2.39144	0.000221336		A_55_P2042988	Aoah	2.97693	0.0246985		A_55_P2017789	Il4ra	2.46992	0.00285148		A_55_P1961736	Rcan2	4.24745	0.00295218
A_55_P2125623		-2.35617	0.0173765		A_55_P2042923	Sgk2	-2.73696	0.00754495		A_55_P2017759	Evi2a	2.56396	0.0170241		A_55_P1961730	Kcnt2	13.8138	0.00714256
A_55_P2125367	Nlrp4d	-2.36728	0.000750797		A_55_P2042863		-2.03658	0.00277984		A_55_P2017709	Igsf9	2.56346	0.044062		A_55_P1961541	A930028N01Rik	2.94624	0.00186704
A_55_P2125351	Sema6d	-3.54733	0.000720905		A_55_P2042808		-2.32227	0.00325201		A_55_P2017699	Lpar5	-2.28517	0.0100726		A_55_P1961499	Ly6c1	6.98532	0.00309597
A_55_P2125311	Rab3b	3.74849	0.00264841		A_55_P2042783	2310075C17Rik	-2.20917	0.00201332		A_55_P2017681	C5ar1	7.02646	0.0195543		A_55_P1961466	Dct	-4.6526	0.00952764
A_55_P2125261	4930523C07Rik	3.53843	0.00232684		A_55_P2042688	Rheb	-2.0541	0.00333012		A_55_P2017636	Thbs1	12.2172	0.0135908		A_55_P1961423	Gsta3	-2.34995	0.0250083
A_55_P2125252	Celf2	-2.3427	0.000190364		A_55_P2042615		3.01145	0.0244142		A_55_P2017487		2.55525	0.0175453		A_55_P1961270	Cd72	2.16848	0.00206725
A_55_P2125229	Arhgef2	3.49713	0.00018875		A_55_P2042570	Wfdc8	-2.03407	0.00295679		A_55_P2017476	Nfyb	-2.18228	0.00917189		A_55_P1961089	Npb	-2.3934	0.0271855
A_55_P2125208	Arid5a	8.03955	0.00034532		A_55_P2042381	Clrn3	-3.2	0.0286745		A_55_P2017418	Cfh	2.2617	0.000410412		A_55_P1961014	Selenbp1	-2.2585	0.00368717
A_55_P2125154	Gm5476	-2.68453	4.34577e-05		A_55_P2042319	Cyp2d40	-2.05089	0.0232847		A_55_P2017347	Krtap11-1	27.6132	8.48604e-05		A_55_P1961009	Apbb1ip	4.75656	0.000791753
A_55_P2125059	Faah	6.70873	0.00043343		A_55_P2042076	Dkk4	-5.88709	0.00111165		A_55_P2017115		10.0665	0.00130484		A_55_P1960655	Tenm4	-2.04483	0.00352163
A_55_P2124871	Npw	6.18858	0.00114945		A_55_P2041788	Gna12	-2.12113	0.00701991		A_55_P2016842	Me1	-2.87945	0.00401802		A_55_P1960581	Kdm5b	-2.29607	0.020326
A_55_P2124812	Olfr121	-3.83384	0.00949184		A_55_P2041708	Gas2	-2.68496	0.00966942		A_55_P2016682	Alkbh7	-2.81011	0.000143015		A_55_P1960416	Lrrc33	3.21669	0.00734808
A_55_P2124712	Ces2c	-54.4226	8.66369e-05		A_55_P2041668	Foxl2	-2.24989	0.0214107		A_55_P2016681	Alkbh7	-2.53527	1.59344e-05		A_55_P1960286	Spns3	3.26736	0.00023513
A_55_P2124641	Gxylt2	-2.2955	0.000732225		A_55_P2041626	Ceacam12	-2.10317	0.00108453		A_55_P2016667	Gstm7	-2.64712	0.000477888		A_55_P1960238	Slc2a6	8.64458	0.00149746
A_55_P2124523		-9.87772	4.98831e-05		A_55_P2041614	Cerkl	5.13515	0.0190498		A_55_P2016662		-2.90103	0.0152146		A_55_P1960202	Vcan	3.86503	0.000298505
A_55_P2124472		-2.34723	0.000966602		A_55_P2041504		-2.13519	0.00268041		A_55_P2016623	Gm5068	5.63671	0.00262614		A_55_P1960148	Igh-VJ558	3.73862	0.00412088
A_55_P2124385	Ak4	-2.16514	0.0144232		A_55_P2041350	Cyp2d34	-27.827	2.60791e-05		A_55_P2016618	Neurl1a	2.14543	0.0013921		A_55_P1960097	Epb4.1l3	3.36621	0.0035694
A_55_P2124331		-2.06193	0.00866079		A_55_P2041331		-2.42387	0.000694257		A_55_P2016462	Cxcl10	4.23885	0.0178393		A_55_P1960033	Prune	2.60514	0.0224748
A_55_P2124273	Myo1f	9.82589	0.000119777		A_55_P2041286	Gm3970	-6.21731	0.000354883		A_55_P2016249	Ppid	-2.06113	0.000460643		A_55_P1959985	Alas1	2.95997	0.0055034
A_55_P2124183		2.09519	0.000197635		A_55_P2041240	Nav2	-2.6556	0.011232		A_55_P2016166	Wfdc2	3.48933	0.000685107		A_55_P1959973	Dcaf12l2	-2.10828	0.00359982
A_55_P2124026	Synj2	-2.16964	0.0204949		A_55_P2041205	Vmn1r76	-2.24993	0.00120314		A_55_P2016139	Atp6ap1l	-2.19049	0.0363114		A_55_P1959891		-2.66774	0.0322813
A_55_P2124016	Nipsnap1	-3.61335	2.31167e-05		A_55_P2041184		-2.49773	0.000552485		A_55_P2016064		-2.59799	0.00834634		A_55_P1959818	Tmem40	2.44819	0.00164415
A_55_P2123933	D2hgdh	-2.22458	0.000255623		A_55_P2041140	Gm9758	-2.38455	0.00619526		A_55_P2016049	Gp6	2.51483	0.0485619		A_55_P1959595	Fmo5	-2.01704	0.0208978
A_55_P2123877	Zfp616	-2.62524	9.87399e-05		A_55_P2041137		-3.78184	0.030792		A_55_P2016034	Nlrc5	2.54411	0.00199086		A_55_P1959500	Ces2e	-6.45221	0.000647938
A_55_P2123822	Rbbp7	-2.13152	8.82234e-05		A_55_P2041090	Tyw5	-2.9502	5.41821e-05		A_55_P2015892	Wwox	-2.24949	0.0390794		A_55_P1959425	Slc16a3	4.71773	1.42688e-05
A_55_P2123802		-2.05167	0.000147858		A_55_P2040878	Ung	-2.51034	0.0218995		A_55_P2015882	Wwox	-2.37365	0.00108673		A_55_P1959379	BC080695	-2.61224	5.64828e-05
A_55_P2123706	Plekhb1	-2.11074	0.0120992		A_55_P2040838	Gm14548	3.58258	0.00849067		A_55_P2015675	AU015836	-3.19995	0.028958		A_55_P1959273		-2.20437	0.018751
A_55_P2123581		-3.69508	0.00665502		A_55_P2040805	Cd209c	-2.144	0.00305887		A_55_P2015541	Hif3a	9.07122	0.0010763		A_55_P1959072	Clec2e	-2.46564	0.0143156
A_55_P2123551		3.0462	0.00466664		A_55_P2040678	Susd2	2.42456	0.000606559		A_55_P2015495	Abat	-2.30243	0.00410629		A_55_P1959064	Oas1b	2.01099	0.00142834
A_55_P2123502	Jam2	2.32855	0.0168881		A_55_P2040534	Btbd9	2.79354	0.0288849		A_55_P2015492	BC048609	2.77816	0.0318262		A_55_P1958457	Nbeal2	7.46047	0.000170154
A_55_P2123381	Fga	2.68481	0.00485726		A_55_P2040490		3.21133	0.0339584		A_55_P2015375	Tuba3a	2.28883	0.0432759		A_55_P1958379	Slit1	2.41253	0.00905338
A_55_P2123291	2310034G01Rik	-3.00094	0.0289926		A_55_P2040292	Gm16390	-2.20696	0.000896181		A_55_P2015292	Ltc4s	-2.04145	0.0265384		A_55_P1958280	Arrdc1	2.52425	1.96375e-05
A_55_P2123057	Olfr853	-2.67285	8.70808e-05		A_55_P2040270	Gm9763	-2.3162	0.0182866		A_55_P2015267		-2.16388	0.0182928		A_55_P1958146	Sh2d1a	10.378	0.000948255
A_55_P2123029	Olfr353	3.67147	0.00694518		A_55_P2040255	Gm10033	-2.24847	0.0193964		A_55_P2015074	Slc10a6	36.4249	0.000794867		A_55_P1957997	LOC100047123	4.82202	0.00667736
A_55_P2122973		2.48521	0.00369216		A_55_P2040245	Fam38b	3.43376	0.0227714		A_55_P2014978	Dvl3	-2.05942	0.00999461		A_55_P1957989		-2.00293	0.00272966
A_55_P2122896		-6.21731	0.0160823		A_55_P2040200	Lrba	-2.03971	0.0346731		A_55_P2014755	Pclo	-4.13593	0.00632156		A_55_P1957813	Gm16508	-2.76311	0.0398111
A_55_P2122835		2.33471	0.00637731		A_55_P2040090	Fn3k	-2.29446	0.0130569		A_55_P2014720		-2.10325	0.0131296		A_55_P1957650		-4.35436	0.00015489
A_55_P2122822		-2.75495	4.10273e-05		A_55_P2040044		2.21109	0.010487		A_55_P2014304	Kank1	-2.13037	0.000191336		A_55_P1957633	Gpsm3	3.11827	0.000383989
A_55_P2122718	Gpr19	-2.04683	0.000619981		A_55_P2039981	Grik2	-2.60941	0.0255692		A_55_P2014209	Scyl2	2.08194	0.00156331		A_55_P1957618	Ak2	-2.30526	2.00995e-05
A_55_P2122666	Pnma3	-3.69918	0.000113473		A_55_P2039881	42983	2.14451	0.0266968		A_55_P2014169	Ppa2	-2.37169	0.00289953		A_55_P1957593	Ino80b	-2.26809	0.00705141
A_55_P2122638		-2.53603	9.12511e-05		A_55_P2039704	S100a2	2.2388	0.0254615		A_55_P2014149		9.44504	0.000343077		A_55_P1957459	Lilrb4	4.88212	0.00392708
A_55_P2122633	Airn	2.92455	0.0284775		A_55_P2039681	Gpr35	-2.37884	0.000641417		A_55_P2014114	Atp5j	-3.14377	0.00257392		A_55_P1957413	Lsp1	6.91421	0.00125584
A_55_P2122464		-6.23492	0.00236046		A_55_P2039359	Tnfsf11	-2.03343	0.00479809		A_55_P2013863	1700028J19Rik	-2.40241	0.0120489		A_55_P1957233		2.03594	0.0463745
A_55_P2122394		-7.35385	0.0237504		A_55_P2039324	Ccnf	-3.28388	0.000226287		A_55_P2013858	Acad8	-2.37464	0.000117971		A_55_P1957114		-2.50486	0.00568861
A_55_P2122374	9230020A06Rik	-2.93712	0.000151338		A_55_P2039250	Mboat2	-4.41549	0.00678704		A_55_P2013823	Gal3st1	4.50403	0.0035425		A_55_P1957049	Bai1	-2.63868	0.0223057
A_55_P2122195	Kcnk9	4.05937	0.045412		A_55_P2039086	Nfkbiz	7.28254	0.00229138		A_55_P2013760	Slc39a14	4.33754	0.000983884		A_55_P1957038	Gstp2	-2.28698	0.00244246
A_55_P2122015		-2.70236	6.81602e-05		A_55_P2039071	Dhdh	-2.02721	0.0395124		A_55_P2013710	Apoc3	-2.34108	0.000530367		A_55_P1957018	Caskin2	2.71844	0.00227139
A_55_P2121992		-2.12631	0.000337015		A_55_P2038987	Gas7	-3.46474	0.00170185		A_55_P2013655	Cd4	-2.27466	0.03111		A_55_P1956782	1700101E01Rik	-4.07826	0.00154645
A_55_P2121886	Map3k9	-2.08354	0.00124147		A_55_P2038854	Gareml	-5.24199	0.00172398		A_55_P2013465	L2hgdh	-2.08738	0.00105174		A_55_P1956627	Gpr160	7.72227	0.00202545
A_55_P2121877	Gpr137b	2.15811	0.0226955		A_55_P2038787	Olfr78	-2.04222	0.00319746		A_55_P2013203	Oxtr	-2.17034	0.0133247		A_55_P1956598		43.59	0.000671966
A_55_P2121827	Dgcr2	-2.55009	8.15402e-05		A_55_P2038757	Fblim1	2.28064	0.0398915		A_55_P2013043	Serpinb6b	2.74447	0.0415115		A_55_P1956593	Plekha4	2.04417	0.0030352
A_55_P2121739	Gm10764	-2.62866	9.57175e-05		A_55_P2038682		-2.20759	0.00583821		A_55_P2013038	Serpinb6c	2.33032	0.0198625		A_55_P1956513	Rhox4c	-2.52671	0.00988143
A_55_P2121735		-3.24834	0.0329612		A_55_P2038627		2.24345	0.0422759		A_55_P2012979	Itgb2l	6.68715	0.00169208		A_55_P1956418	Efr3b	5.73343	0.000431986
A_55_P2121682	Alox12b	3.77595	0.000493774		A_55_P2038540	Hbb-b2	-2.52097	0.0018436		A_55_P2012974	Sdha	-2.01197	6.66109e-06		A_55_P1956223	Chka	-2.50933	0.0218051
A_55_P2121521	Hist1h3i	2.32694	0.0147311		A_55_P2038534	Gm6999	3.21272	0.0138452		A_55_P2012899	Vsig4	4.67361	0.00179477		A_55_P1956179	Git2	3.20447	0.0131512
A_55_P2121516	Ankfn1	2.24497	0.0302774		A_55_P2038484	4933427D06Rik	-2.52783	0.0228215		A_55_P2012849	Dock10	2.54728	0.022048		A_55_P1956083	Gpr68	8.1385	0.00141918
A_55_P2121511	AI849053	-2.98666	5.15526e-05		A_55_P2038452		2.28669	0.0332427		A_55_P2012789	Impa1	-2.06674	4.63419e-05		A_55_P1956048	H2-T3	-2.56679	0.0262953
A_55_P2121491	Bbs9	2.04005	0.00148115		A_55_P2038427		-2.10267	0.0032854		A_55_P2012779	Rnf167	-2.26674	5.11638e-05		A_55_P1955950	Gm8437	10.3516	0.012861
A_55_P2121484	Smo	4.181	0.00112996		A_55_P2038384	Prkd3	-2.17372	0.0378027		A_55_P2012599		3.17122	0.000978777		A_55_P1955876	Ifitm7	-2.30012	0.0026553
A_55_P2121446	Gm10751	-2.32916	0.0460504		A_55_P2038372	Acot6	4.97679	0.0023153		A_55_P2012444	Tnfrsf19	-5.09773	0.0103005		A_55_P1955778	Adamts4	2.9406	0.0153892
A_55_P2121408	Tpm2	-2.66052	0.0103194		A_55_P2038347	Acot3	13.1399	0.0452135		A_55_P2012439	Tnfrsf19	-16.1449	0.000158115		A_55_P1955733	Ptpn5	-2.95758	0.000702648
A_55_P2121280		-2.8168	2.42679e-05		A_55_P2038313		-2.97154	0.0273618		A_55_P2012430		-2.23757	0.0348564		A_55_P1955656	Ctla2a	3.83574	0.000749554
A_55_P2121275	Gm4907	6.50837	0.000220496		A_55_P2038277	Gm872	-2.70704	0.00822703		A_55_P2012349	Fermt2	-2.04193	0.00494156		A_55_P1955548	Ezr	2.0829	0.00100737
A_55_P2121225	Cyp3a11	-3.28123	0.00305804		A_55_P2038257	Slc9a5	-2.75952	0.0113305		A_55_P2012261	Xkr9	-3.43459	0.000328787		A_55_P1955483	Grb14	-2.03595	0.00041058
A_55_P2121185	Omp	3.21948	0.0150042		A_55_P2038126	Tpmt	-2.86401	9.49709e-05		A_55_P2012241	Ctso	-2.90982	0.0118929		A_55_P1955308	Sirpb1a	10.5869	0.000289557
A_55_P2121151	Znf41-ps	3.15192	0.00534864		A_55_P2038101	Dock11	2.13643	0.0496314		A_55_P2011802	Pdk2	-2.62218	0.00921677		A_55_P1955305	Sirpb1a	10.5752	0.00345513
A_55_P2121106	Tomt	-4.41762	0.0311306		A_55_P2037857	Svs2	-2.51705	0.00849592		A_55_P2011712	Dlg1	4.26958	0.00202929		A_55_P1955015	Myo1g	7.92294	0.000326471
A_55_P2121096	Fbn2	3.87064	0.001955		A_55_P2037827	Bmp10	3.78775	0.00118022		A_55_P2011702	Ppargc1a	2.91617	0.0439791		A_55_P1954718	Cyb561	7.01718	0.000141429
A_55_P2121081	Cul2	-2.03225	0.000173341		A_55_P2037743		-2.26773	0.00106463		A_55_P2011678	Pdzk1ip1	-3.31036	0.00687641		A_55_P1954648	Siglec1	5.27378	0.000382702
A_55_P2121023	4930413G21Rik	-2.323	0.0458367		A_55_P2037732	Foxl2	-2.75131	0.00104667		A_55_P2011387	Tifa	10.0317	0.00707062		A_55_P1954393	Susd4	-4.728	0.000162228
A_55_P2120956		3.00504	0.0159141		A_55_P2037697	Gm9733	9.75675	0.0342819		A_55_P2011385		9.73491	0.00743358		A_55_P1954302	Esrrb	2.46027	0.00164912
A_55_P2120946	Mefv	2.11348	0.0188423		A_55_P2037667		-2.58927	0.0105588		A_55_P2011341		10.3881	0.0407109		A_55_P1954086	Postn	3.0051	0.00498567
A_55_P2120931	Dleu2	-5.39969	0.000592206		A_55_P2037608	Acp5	-2.1204	0.008498		A_55_P2011336		-3.36514	0.0307736		A_55_P1954034	Jakmip1	2.97016	0.0237332
A_55_P2120882	Cldn24	-2.64203	4.04309e-05		A_55_P2037588		2.76334	0.0173412		A_55_P2011325	Gm6598	2.85422	0.00909201		A_55_P1953980	Sdhb	-2.34341	0.000286396
A_55_P2120807	Dld	-2.68334	0.000847421		A_55_P2037428	Mogat1	-4.60578	0.00971575		A_55_P2011300	Fggy	-2.38893	0.00104623		A_55_P1953928	Dcdc2b	-2.2249	0.00033461
A_55_P2120662	Mob3b	-2.47357	6.45426e-05		A_55_P2037162	Esyt1	2.93724	0.00332066		A_55_P2011151	Tmprss3	3.463	0.0294055		A_55_P1953899	Mccc1	-2.08331	0.00115163
A_55_P2120551		4.0774	0.0332926		A_55_P2037156	Pja1	-2.02837	0.000992761		A_55_P2011031	Cdk5rap1	-2.58271	0.0372028		A_55_P1953788	Itk	6.63053	0.00273115
A_55_P2120469	Armc2	4.15876	0.00177651		A_55_P2036932		-2.42442	0.000697274		A_55_P2010912	Jak3	3.21961	0.00106929		A_55_P1953377		2.07245	2.76855e-05
A_55_P2120388	Skint7	-2.35816	0.00700088		A_55_P2036922		-2.37701	0.000620698		A_55_P2010773	Tbx2	2.49224	0.00817448		A_55_P1953341	Wfdc2	2.00828	0.00683645
A_55_P2120354	Cib2	-2.15658	0.0010072		A_55_P2036912		-2.19571	0.00156479		A_55_P2010672	Kif17	-2.29456	0.0320483		A_55_P1953226	Gm14484	-2.13648	0.0148137
A_55_P2120308	Cacna1a	-7.56207	0.0219392		A_55_P2036698	Olfr348	-2.46055	0.00305519		A_55_P2010596	Tdpoz2	2.45074	0.00639346		A_55_P1953169	Saa3	85.3427	0.0112475
A_55_P2120219	Rad51b	6.12982	0.000463799		A_55_P2036547	Hsd3b2	-3.50662	0.0136694		A_55_P2010567		3.91095	0.00109744		A_55_P1953103	Nudt7	-4.19164	0.046853
A_55_P2120169	Myh8	3.49763	0.0169425		A_55_P2036533	Nek10	-2.09588	0.00283765		A_55_P2010547		5.5792	4.3135e-05		A_55_P1953063	Hspe1	-2.05307	0.0176
A_55_P2120155	Ccdc88b	2.99695	3.70422e-05		A_55_P2036180	Mcf2l	3.97624	0.0319293		A_55_P2010539		-2.04364	0.00201997		A_55_P1953003	Atp6v0a4	28.1665	0.0125995
A_55_P2120089	Zmynd11	-2.24797	0.0211033		A_55_P2036128	Gm2027	-2.09366	0.00282416		A_55_P2010332	Ewsr1	-2.24197	0.00021576		A_55_P1952981	Rps6ka3	2.48096	0.0441955
A_55_P2119985	Baiap2	2.00004	0.0495213		A_55_P2036018	4930408F14Rik	-2.34896	0.000627231		A_55_P2010271	Samsn1	13.9544	0.00100268		A_55_P1952882	Cyp4f18	2.36358	0.0110322
A_55_P2119972		-4.0697	0.000327439		A_55_P2035986	E330020D12Rik	2.9483	0.0157349		A_55_P2010197	Serpina10	2.87591	0.000298027		A_55_P1952768		4.52773	0.012063
A_55_P2119969	Bdh2	-7.13402	0.000227119		A_55_P2035976		3.53751	0.0013871		A_55_P2010196	Serpina10	3.80009	0.00266211		A_55_P1952618	Ear2	5.11626	0.0043726
A_55_P2119957	Mlxipl	-2.13744	0.0229087		A_55_P2035932	Fgf7	-2.45693	0.0463536		A_55_P2010152	Sell	9.16939	0.00552338		A_55_P1952312		-2.09251	0.0419216
A_55_P2119927		2.05481	0.00768232		A_55_P2035927	Ccdc121	-2.10077	0.00210114		A_55_P2010106		-2.523	0.021859		A_55_P1952230	Gm8883	3.79148	0.00159952
A_55_P2119907	Dnahc11	-2.53589	0.0154298		A_55_P2035804	Fzd8	-3.17905	0.00017291		A_55_P2010097	Mup2	-11.0702	3.9897e-05		A_55_P1952076	Npb	-2.43925	0.0116623
A_55_P2119892	Erbb4	-14.0712	0.000770434		A_55_P2035757	Gm8884	4.89051	0.00123247		A_55_P2010066	Capn3	-3.21869	0.00411638		A_55_P1952071	Npb	-2.56168	0.00884614
A_55_P2119764	Krtap6-1	4.8065	0.0152125		A_55_P2035683	Gm5817	-4.26915	0.0308774		A_55_P2010048	2810416G20Rik	2.55691	0.00129267		A_52_P99848	Pik3cd	6.64644	0.000955696
A_55_P2119737	AA414992	2.27486	0.00172299		A_55_P2035584		2.18314	0.000251664		A_55_P2009952	Me1	-2.43647	0.00651279		A_52_P98778	Ang4	3.83067	0.00011671
A_55_P2119440	Vma21	2.54939	0.0210477		A_55_P2035524	Kif9	-2.13672	0.0482207		A_55_P2009882	Ccbe1	4.59543	0.00865033		A_52_P9703	Cyp2a4	-2.42848	0.0158334
A_55_P2119420	Ndufb2	-2.07918	0.00252584		A_55_P2035424	Hpgd	-2.51183	0.00899599		A_55_P2009861		4.34516	0.000597014		A_52_P93837	Mme	-7.40139	0.00148812
A_55_P2119332	Pfkfb4	-3.02129	0.0333494		A_55_P2035340		-8.81127	0.000234919		A_55_P2009857		2.07416	0.0434345		A_52_P92472		-2.30547	0.0093175
A_55_P2119302	Cspp1	2.54569	0.00144894		A_55_P2035335		4.73256	0.00546983		A_55_P2009604		-2.09895	0.00450268		A_52_P91274	1700018G05Rik	3.31359	0.0086508
A_55_P2119274		3.46101	0.0054076		A_55_P2035326	D5Ertd605e	-2.81514	0.0119725		A_55_P2009449	Pnma2	-2.93349	0.0215597		A_52_P90363	Ifi27l2a	11.7392	0.00345046
A_55_P2119257	Serpine1	95.5455	0.00321429		A_55_P2035117	Itln1	-2.11059	0.00272105		A_55_P2009217	Rnu3b1	-2.69063	0.00723691		A_52_P89567	Rhob	3.58885	0.000587747
A_55_P2119184	Olfr16	7.38995	1.44213e-05		A_55_P2035087	Arhgef15	-2.72387	0.0175687		A_55_P2009111		-2.35863	0.0332522		A_52_P89335	Tmie	-2.87505	0.0454946
A_55_P2119032	Rasl2-9	-2.13117	7.77103e-05		A_55_P2035052	Il1f10	2.16152	0.0103702		A_55_P2009086	Creb3l1	-2.2529	0.00442839		A_52_P87964	Pla2g12a	2.00091	0.0209603
A_55_P2119030	Rasl2-9	-2.58853	0.000156687		A_55_P2035018	Clec4n	2.97044	0.0419427		A_55_P2008933	Slc17a3	-2.24797	0.0137113		A_52_P87843	Aldh1a3	5.84916	0.0135802
A_55_P2119025	2610318N02Rik	-2.59609	9.01888e-05		A_55_P2035008		-2.2701	0.00350513		A_55_P2008926	Slc17a3	-2.46185	0.0419058		A_52_P86073	Mrpl1	-2.13631	0.00212421
A_55_P2118873	1700054O19Rik	2.16543	0.0098572		A_55_P2034531		13.3066	0.0110703		A_55_P2008740	Fcgr1	4.03299	0.00310074		A_52_P836852	Txk	2.29571	0.0492974
A_55_P2118759	Peg12	-2.1723	0.0144949		A_55_P2034487	4932435O22Rik	-4.06446	0.0192538		A_55_P2008735	Cdc123	2.17281	7.92194e-05		A_52_P82247	Cycs	-2.02445	0.000173469
A_55_P2118724	Olfr1199	-2.98325	3.62603e-05		A_55_P2034415	Lrrc8d	-2.101	0.00222166		A_55_P2008704	Gstp2	-2.68765	0.0260112		A_52_P821	Fli1	2.15168	0.00398292
A_55_P2118709	Fam228b	-4.20945	2.92199e-07		A_55_P2034355	Eif4g3	-2.99324	0.0328664		A_55_P2008651	Qdpr	-2.5831	0.000964387		A_52_P81783	Gspt1	-2.05231	0.000713979
A_55_P2118684	Idh2	-2.17911	0.000704376		A_55_P2034032	Il12rb1	5.87083	0.00285201		A_55_P2008297	Cd300a	5.18226	0.00753256		A_52_P81693	LOC100502592	-2.49513	0.000331096
A_55_P2118675	Tnip1	2.19151	1.78199e-05		A_55_P2033972		-2.07993	0.00287926		A_55_P2007816	Mup4	-25.9734	0.00574231		A_52_P79513	Zfp84	-2.36476	0.0268161
A_55_P2118674	Tnip1	2.165	1.96939e-05		A_55_P2033922	Tsga8	-2.26969	0.0498632		A_55_P2007802	Smarca2	-2.02419	0.000587984		A_52_P79506	Zfp667	-2.18535	0.0313647
A_55_P2118655	Taar7b	2.08611	0.00122901		A_55_P2033767	Esrp1	-6.07745	0.00225432		A_55_P2007771	Catsper2	2.49791	0.00231529		A_52_P78373	Sorbs3	2.08878	0.0455602
A_55_P2118570	Cd37	8.07265	0.000348972		A_55_P2033756	Gm8179	-2.59986	0.00626254		A_55_P2007713	Tspan4	2.27311	0.00137546		A_52_P78257	Plekha2	2.31415	0.00291542
A_55_P2118540		2.5086	0.04644		A_55_P2033705	Pax3	-2.6043	0.0404798		A_55_P2007646	Cryaa	-7.31324	0.0086025		A_52_P75465	Gdpd1	2.69143	0.022415
A_55_P2118268	Chpf	2.66924	0.00220898		A_55_P2033690	LOC101055644	2.60553	0.0342172		A_55_P2007630	Sez6l2	3.99763	0.00246668		A_52_P744437	D930028M14Rik	2.51724	0.033938
A_55_P2118259	Olfr1349	5.19628	0.000225095		A_55_P2033665		-2.34426	0.0348699		A_55_P2007601	Sftpd	5.52007	0.00077799		A_52_P74344	Olfr176	-7.85922	0.00144366
A_55_P2118067	4930404H24Rik	8.77447	0.000420853		A_55_P2033605		-2.02784	0.0111238		A_55_P2007496		9.68206	0.0022651		A_52_P73620	Serpinb10	3.35324	0.0206399
A_55_P2118037	Sirpa	7.46877	6.03752e-05		A_55_P2033326		-4.49311	0.0252589		A_55_P2007495		5.36755	0.00267005		A_52_P73552	A1bg	3.30442	0.0356207
A_55_P2117984	Vangl2	-2.04603	0.00816122		A_55_P2033272	Treh	-2.79859	0.0312692		A_55_P2007273	Pole	-4.33841	0.00250844		A_52_P73475	Fam78a	3.40113	0.00474662
A_55_P2117959	Cyp4b1	-2.17519	0.028223		A_55_P2033200		-2.06741	0.00171099		A_55_P2007155	Akr1c14	-4.76478	0.000240258		A_52_P72587	Prkcq	4.18045	0.0178478
A_55_P2117853	Lhx9	-3.46614	0.00192763		A_55_P2033155	Gm3830	-2.2418	0.00196205		A_55_P2007022	Cd97	2.01965	0.000659817		A_52_P72237	Actg1	2.5687	0.0145091
A_55_P2117809		-2.47982	0.000138925		A_55_P2033150	Olfr1335	-2.25099	0.00209266		A_55_P2006930	2610005L07Rik	-6.34645	8.63699e-08		A_52_P7221		-2.56622	0.0486181
A_55_P2117774	Gm14092	-2.37833	0.000143567		A_55_P2033120	Srxn1	-2.08844	4.53389e-05		A_55_P2006906	Armcx3	4.63812	0.00579879		A_52_P700056	Wfdc17	3.48403	0.00169877
A_55_P2117731	Pak4	-3.08098	0.00130587		A_55_P2033041	Sirpb1b	7.46348	0.0302019		A_55_P2006869	Fyb	4.12942	0.0010337		A_52_P68893	Ifng	7.54978	0.000589669
A_55_P2117689	Rmnd1	-2.15602	0.000731919		A_55_P2032982	4921528I07Rik	-2.01218	0.00299048		A_55_P2006768	Esd	-2.16029	0.00580761		A_52_P686785	Lyve1	4.39939	0.0135708
A_55_P2117649	Slfn9	2.56856	0.00992674		A_55_P2032936	Cisd1	-2.08995	0.0379103		A_55_P2006677	Gm7969	8.60316	0.000296423		A_52_P684138	Dpf3	2.79956	0.00187781
A_55_P2117630	Snrnp25	-2.35613	1.79033e-05		A_55_P2032868	Lrrd1	-2.24703	0.00370644		A_55_P2006499	Esrrg	-3.5668	0.0078995		A_52_P683580	Tbc1d9	5.08599	0.0120887
A_55_P2117623	Tnfrsf13c	2.36775	0.0240106		A_55_P2032823	Trim2	-2.39372	0.0393621		A_55_P2006023	C130073F10Rik	49.4019	0.00037303		A_52_P682996		-2.35582	0.0278854
A_55_P2117579	Ppih	-2.76714	9.97889e-05		A_55_P2032775		12.9842	0.0346372		A_55_P2006018	Slc4a2	-2.12023	0.0210329		A_52_P682382	Scd1	-9.36612	0.00557516
A_55_P2117574	Ppih	-2.5282	0.00264467		A_55_P2032755	LOC100048345	-2.03074	0.0305768		A_55_P2005956	Egfbp2	-16.7387	0.000382813		A_52_P681310	Plaur	4.94142	0.0376213
A_55_P2117380	Asb4	3.90425	0.000260092		A_55_P2032718	Klra9	2.46168	0.000164084		A_55_P2005941	Plcxd1	-3.16469	0.000246487		A_52_P679860	Herc6	2.49483	0.000719925
A_55_P2117287		-2.50427	0.000105428		A_55_P2032668		-2.22366	0.0394622		A_55_P2005903	Lhx6	-2.55068	0.0356576		A_52_P676623	Zfp518a	2.5237	0.0122573
A_55_P2117247	Enam	-3.20151	0.0031153		A_55_P2032649	Kif5b	-2.38005	0.000845489		A_55_P2005859	Fn3k	-3.56731	0.00347228		A_52_P671543	Pomc	2.04086	0.038229
A_55_P2117187	Olfr1243	2.35344	0.017449		A_55_P2032576		-2.40729	0.000922026		A_55_P2005808	3110057O12Rik	-2.09963	0.000512441		A_52_P670188	Sdr9c7	-2.80205	0.00308858
A_55_P2117119	Efhd1	-2.40092	0.0152878		A_55_P2032478	Sfxn5	-2.57736	0.0224563		A_55_P2005735	Trpm2	4.64429	0.00720234		A_52_P669922	Hamp	4.33674	0.00021973
A_55_P2116880	Vax1	-2.49183	0.000847263		A_55_P2032388	Trim24	3.09384	0.00122371		A_55_P2005585	Trps1	2.88426	0.000837119		A_52_P668478	Rhbdd2	3.4576	0.00807983
A_55_P2116868	A130010J15Rik	-2.34666	0.0108961		A_55_P2032267	Gm10767	-2.02071	0.000162908		A_55_P2005501	Olfr392	-4.15596	0.00731719		A_52_P661044	Ccr3	3.66458	0.000229515
A_55_P2116794		-3.43738	1.3793e-06		A_55_P2031898		-2.00795	0.0289376		A_55_P2005345	Epb4.1	2.16495	0.000846328		A_52_P660047	1810034E14Rik	-2.04527	0.0177503
A_55_P2116748		-2.60472	6.7278e-05		A_55_P2031887	LOC633282	-2.10351	0.00328244		A_55_P2005213	Ces2c	-14.5833	1.81807e-05		A_52_P659312	Spsb4	-2.62864	0.0478855
A_55_P2116714		-2.99382	0.0311695		A_55_P2031721	Npas1	-4.18436	0.0476108		A_55_P2005055	Pepd	-2.0971	2.77656e-05		A_52_P656845	Mtnr1a	-5.38879	5.73292e-05
A_55_P2116689	1700024P16Rik	2.06882	8.84649e-05		A_55_P2031692	Gstm6	-2.23153	0.00988107		A_55_P2004797	Tacc2	6.46269	0.000191742		A_52_P653825	Keg1	-6.17663	0.0395434
A_55_P2116674		-4.27824	0.00591789		A_55_P2031676	Gstm6	-2.02901	0.00690749		A_55_P2004781	Ass1	-2.87987	0.0281928		A_52_P651248	Zdhhc2	3.28556	0.00794487
A_55_P2116621	Cited2	-3.02286	0.00600761		A_55_P2031668	Gstp1	-9.58396	0.000177106		A_55_P2004746	Xkrx	2.54005	0.0316882		A_52_P650387	Ccnjl	2.58368	0.0204794
A_55_P2116450	Olfr1337	-2.22205	0.00550462		A_55_P2031508	1700029H14Rik	-2.92835	0.0252945		A_55_P2004732	Ttc39a	4.59402	0.00509624		A_52_P650028	Dock10	3.30989	0.0147361
A_55_P2116341		2.64498	0.00326548		A_55_P2031471	Rufy4	2.27785	0.0463299		A_55_P2004727	Gm10353	-2.25707	0.00549773		A_52_P646552	Olfr128	-2.46546	0.00235143
A_55_P2116310	Trim45	-2.36697	6.23938e-05		A_55_P2031442	Pithd1	-2.09692	0.0120902		A_55_P2004606	Serpina4-ps1	-8.69847	0.0039254		A_52_P645410	Apobec3	2.58749	0.026216
A_55_P2116290	Szrd1	-3.05428	0.000420009		A_55_P2031436	Ly6e	2.00653	0.0106852		A_55_P2004562	Klra2	4.42645	0.0165039		A_52_P642167	Soat1	3.01921	0.0355306
A_55_P2116272	Cyp2c38	-5.4603	0.00244322		A_55_P2031248	Sun1	-2.56818	0.0472074		A_55_P2004457	Prrg1	-3.0694	0.0185359		A_52_P641282	Pdilt	-2.69295	0.0118961
A_55_P2116235		-2.21988	0.00735847		A_55_P2031100	Ahcy	-2.20482	0.0126437		A_55_P2004447	Fgl1	8.76752	0.00241689		A_52_P641132	Sox14	-2.26595	0.0372485
A_55_P2116165	Pfkfb3	3.28216	0.00278457		A_55_P2030903	Rsph4a	4.30513	0.00655547		A_55_P2004258	Gm7102	-2.10726	0.0250857		A_52_P639402	Kcnk3	3.89647	0.00992117
A_55_P2116160	Ccdc106	3.81096	0.00235518		A_55_P2030883	Esr1	3.03049	0.000798802		A_55_P2004016	Crispld2	3.00168	0.000769134		A_52_P63905	Ddc	-3.10217	0.00398723
A_55_P2116159		-3.06638	0.00267485		A_55_P2030775	Fnbp1	-2.00202	0.0212368		A_55_P2003981		8.72042	0.000244763		A_52_P638459	Ccl5	19.8123	0.00131675
A_55_P2116054	Caprin1	-2.10572	0.00225901		A_55_P2030761		-2.44116	0.0264964		A_55_P2003883	Gm9909	-4.41207	0.030083		A_52_P637282	Wipf1	2.38156	0.00289923
A_55_P2115981	Xlr5c	-2.7837	2.83657e-05		A_55_P2030712		-5.7428	0.0376418		A_55_P2003438	Nr6a1	-4.37467	0.00608841		A_52_P635338	Fes	2.03719	0.00307144
A_55_P2115955	Raet1e	-2.1049	0.04693		A_55_P2030331	Iltifb	-2.95465	0.0119463		A_55_P2003178	Zc2hc1c	-2.37071	0.0173016		A_52_P633785	Gm11696	2.88891	0.0100752
A_55_P2115916	Lactbl1	-2.69767	0.00126626		A_55_P2030282	Gm5796	2.21779	0.00515328		A_55_P2003096	Pla2g6	-2.28228	0.00042448		A_52_P633410	Gabarapl1	-2.12809	0.000240605
A_55_P2115846	Gm10836	-4.00832	0.0011736		A_55_P2030194	Ifna5	2.56984	0.0004206		A_55_P2003053	Dct	-38.1047	0.000213055		A_52_P630867	Abcc4	2.92444	0.00795783
A_55_P2115781	Alg12	2.3187	0.0042226		A_55_P2030186	Ifna7	3.41734	0.0255587		A_55_P2003005	Capza1	2.54079	0.0436507		A_52_P628580	Ggt7	-2.62242	0.0199682
A_55_P2115696	5930422O12Rik	2.23465	0.0127849		A_55_P2030171	Ifna2	4.68204	2.92693e-05		A_55_P2002933	Klk1b5	-15.3115	0.000156259		A_52_P627816	Tgm1	6.06869	8.49938e-05
A_55_P2115623		-5.71194	0.0199173		A_55_P2030077	Ifnab	2.55899	0.0016888		A_55_P2002903	Smoc2	2.19837	0.008746		A_52_P627269	Ces2b	-47.3556	0.00157644
A_55_P2115607	Ikbip	2.12061	0.0311136		A_55_P2029835		-2.01134	0.00122593		A_55_P2002859	Aifm2	2.87049	0.000922591		A_52_P624434	Clec1a	2.16033	0.00490366
A_55_P2115567	Slc26a1	-2.20044	0.00371038		A_55_P2029678	Etfa	-2.02497	0.00414046		A_55_P2002854	Aifm2	3.38249	0.00205136		A_52_P616392	Sbno2	2.04204	0.0166025
A_55_P2115458	Pot1a	-3.64834	0.00159987		A_55_P2029630	Mpdu1	-2.26229	0.00670532		A_55_P2002849	Aifm3	-5.09552	2.82352e-05		A_52_P616332	Atp10d	2.92391	0.0336135
A_55_P2115401	Bst1	3.41319	0.000205612		A_55_P2029558	Adrb2	7.68263	0.000973182		A_55_P2002773	1810053B23Rik	18.4179	0.0021527		A_52_P614777	Sucnr1	-9.58112	0.00499883
A_55_P2115350		-2.46375	0.0455145		A_55_P2029420	2610318N02Rik	2.2738	0.0440128		A_55_P2002772	1810053B23Rik	6.90892	0.000510261		A_52_P614207		3.57696	0.0471042
A_55_P2115330	Nrg4	11.6995	0.00802741		A_55_P2029252		-2.10112	0.00048125		A_55_P2002757	Blnk	-5.16769	0.00247674		A_52_P612382	Cdc25b	6.31296	0.00114338
A_55_P2115318	Fmr1nb	3.21409	0.0131882		A_55_P2029235	Btn1a1	-2.71823	0.02074		A_55_P2002727	Inpp4a	2.34882	0.0172373		A_52_P611000	Esd	-3.43294	0.0222938
A_55_P2115281		-2.07365	0.000484716		A_55_P2029221	Gm5591	-5.47454	0.00321008		A_55_P2002642	Ccdc67	-2.14891	0.0255425		A_52_P609972	Eln	-2.31728	0.0198481
A_55_P2115220	Gm11437	-4.19908	0.000363061		A_55_P2029161	T	-2.08184	0.0222128		A_55_P2002578	Ephx1	-2.73705	0.0493408		A_52_P609868	Timd4	2.73601	0.00583398
A_55_P2115166	AI661453	-2.63785	7.56542e-05		A_55_P2029136	Zfp287	-3.99292	0.00684181		A_55_P2002577	Ephx1	-2.83737	0.0329128		A_52_P607128	Msr1	3.27747	0.00497028
A_55_P2114995		2.9367	0.00304003		A_55_P2029061	Tnfrsf9	-2.68056	0.0222288		A_55_P2002557	Srebf1	-21.9615	6.98977e-05		A_52_P604195	Mbp	2.30063	0.0144645
A_55_P2114994		3.49811	0.0188889		A_55_P2029051	Fgd3	2.80992	0.0037111		A_55_P2002309	Pip5kl1	-2.48391	0.0258032		A_52_P60353	Greb1l	3.40919	0.0491275
A_55_P2114993	Actg1	2.15692	0.0174202		A_55_P2029046	Fgd3	5.51782	0.0126788		A_55_P2002135	Vmn2r-ps54	7.12479	0.000965837		A_52_P602091	Csf1r	4.21936	0.00231752
A_55_P2114938	Irf9	4.1588	1.96826e-05		A_55_P2029016		-3.32706	0.0135754		A_55_P2002129	Rgs12	-2.62086	0.0214937		A_52_P601688	Abcc1	2.68886	0.0229305
A_55_P2114834		-3.74759	0.00550224		A_55_P2029013	Bpifb5	-2.21149	0.00148442		A_55_P2002122	Rgs12	-2.16921	0.00707524		A_52_P599317	Hs6st2	-2.35486	0.0360126
A_55_P2114769		-2.85783	5.63285e-05		A_55_P2028986		17.6845	0.0139769		A_55_P2001998	Zfp503	-3.12955	0.000405908		A_52_P597775	Gprc5a	7.37225	0.000355196
A_55_P2114695		-2.86969	0.0024069		A_55_P2028852		4.97153	0.0011001		A_55_P2001780	Cyp3a41b	-36.8331	1.84772e-05		A_52_P597371	Ncald	-2.07903	0.0493519
A_55_P2114680	Car4	-2.02077	0.00450689		A_55_P2028842	Olfr1250	-2.26878	0.0473791		A_55_P2001583	Tspan18	-2.11525	0.0267137		A_52_P59681	Hrsp12	-2.72336	0.000960514
A_55_P2114670		-2.85479	0.0496866		A_55_P2028725	G630018N14Rik	-2.05758	0.00291646		A_55_P2001553	Igdcc4	468.451	3.68676e-06		A_52_P594756	Asb4	5.24807	0.0348459
A_55_P2114498	Gm8801	2.016	0.00108658		A_55_P2028698	Dmc1	-2.88936	0.00511281		A_55_P2001518	Pde6h	18.5018	0.00753573		A_52_P593037	Acsl5	-2.61583	0.0070374
A_55_P2114367	Ccdc162	-4.84542	0.0258881		A_55_P2028570	Sgsh	-2.31184	0.0305353		A_55_P2001489	Il19	2.40876	0.023012		A_52_P592195	Zkscan8	2.9982	0.0284125
[truncated: 8,564 more rows]

## Sheet: Microarray Small Intestine
		day3vsmock					day3&a-TNFvsmock					day4vsmock			ProbeID	GeneSymbol	fold change	p-value
ProbeID	GeneSymbol	fold change	p-value		ProbeID	GeneSymbol	fold change	p-value		ProbeID	GeneSymbol	fold change	p-value		A_66_P140742	Adc	-2.09615	0.0372602
A_66_P140742	Adc	-2.12728	0.0213509		A_66_P139876	Psph	3.093	0.00189579		A_66_P140699	Gm6403	4.37317	0.000106122		A_66_P140699	Gm6403	2.0613	0.000185849
A_66_P140699	Gm6403	2.63666	0.000381226		A_66_P139683	Zbp1	2.12729	0.0431939		A_66_P140507	Lhpp	-4.32539	0.00179824		A_66_P139971	Gm7894	-2.78364	0.00909789
A_66_P139876	Psph	3.93869	0.00133293		A_66_P138976	Lpin2	-4.08921	6.41898e-06		A_66_P140223	1810024B03Rik	2.70105	0.0428732		A_66_P139876	Psph	6.10369	7.39649e-05
A_66_P139703	Wnt4	-2.91064	0.0013825		A_66_P138001	Atp2b1	-3.66121	0.00465469		A_66_P139876	Psph	4.71889	0.000446368		A_66_P139703	Wnt4	-3.45652	0.000875152
A_66_P139029	Efcab9	-2.81949	0.00347287		A_66_P137775		-2.26578	0.0112717		A_66_P139703	Wnt4	-10.2139	4.85367e-05		A_66_P139683	Zbp1	2.4103	0.0240718
A_66_P138976	Lpin2	-3.89346	8.01201e-05		A_66_P137268	Abcc6	-4.65821	0.018143		A_66_P139694	Mppe1	-2.59792	0.026306		A_66_P139029	Efcab9	-2.20999	0.00705078
A_66_P138289	Rdh5	-2.12787	0.0181741		A_66_P136930		-2.39268	0.0283254		A_66_P139683	Zbp1	-11.4631	0.00114839		A_66_P138976	Lpin2	-3.96839	4.4848e-06
A_66_P138001	Atp2b1	-3.68086	0.0032356		A_66_P136489	Gm9456	-3.7269	0.00243664		A_66_P139666	Tmem229a	-14.1049	0.00475931		A_66_P138289	Rdh5	-2.39661	0.00154619
A_66_P137775		-2.49395	0.0421756		A_66_P135700	Cyp2d11	-4.62503	0.00959314		A_66_P139618	Stfa2	9.60809	0.0237219		A_66_P138099	Adcy10	-2.77307	0.00652844
A_66_P137268	Abcc6	-4.71933	0.00254108		A_66_P134355	Lrrtm3	-2.80598	0.0133233		A_66_P139387	Prlr	-4.5599	0.000584664		A_66_P138001	Atp2b1	-5.25715	0.00207619
A_66_P137223	Olfr452	-2.30626	0.0241175		A_66_P133525		-2.43222	0.0206766		A_66_P139088		3.23647	0.0153508		A_66_P137794	Gpr161	-2.13266	0.025799
A_66_P136489	Gm9456	-4.74925	0.000371184		A_66_P133269	Hesx1	7.39947	0.0028793		A_66_P139029	Efcab9	-6.16526	0.000314344		A_66_P137660	Fam166b	-2.15425	0.0438266
A_66_P135700	Cyp2d11	-6.23577	0.00949304		A_66_P132888	Dhfr	-4.27127	0.000523358		A_66_P138976	Lpin2	-2.02629	0.000686973		A_66_P137285	A730045E13Rik	-3.91326	0.0136186
A_66_P135651	Capn9	-2.63724	0.0307459		A_66_P132515	Chmp4c	-2.42298	0.00137783		A_66_P138929	Lox	19.9079	0.00393791		A_66_P137268	Abcc6	-5.85931	0.00119723
A_66_P135403	AI481877	2.05571	0.0186481		A_66_P132249	Akr1c13	-2.33419	0.0287131		A_66_P138462	Sprr2h	35.2423	0.0456123		A_66_P136930		-3.51236	0.00114024
A_66_P135194	Yrdc	2.42215	0.00236114		A_66_P131406	Gm10099	5.80794	0.000833658		A_66_P138406	Clec4b1	3.11611	0.000129695		A_66_P136489	Gm9456	-5.26332	0.000110629
A_66_P135106	Slco3a1	2.19435	0.000529006		A_66_P131389	Ugt2b38	-46.6223	0.000648178		A_66_P138289	Rdh5	-9.96893	3.03943e-05		A_66_P136064	Tmem132d	-2.20575	0.0257439
A_66_P134355	Lrrtm3	-3.57873	0.00483595		A_66_P130612	2810408A11Rik	-3.29135	0.00120235		A_66_P138178	Gm4107	3.1103	0.0351174		A_66_P135870	Nlrp9b	2.13804	0.0359713
A_66_P133525		-4.49797	0.00943066		A_66_P130432	Cd80	2.23665	0.0135225		A_66_P138001	Atp2b1	-4.43621	0.00193916		A_66_P135700	Cyp2d11	-10.7032	0.000806195
A_66_P133269	Hesx1	12.4722	0.000755335		A_66_P130213		6.41969	0.0141163		A_66_P137654	Smpd2	-2.78776	0.0010933		A_66_P135651	Capn9	-2.33238	0.0029983
A_66_P133255	Prkch	2.45955	0.0235098		A_66_P129209	Gm12511	-2.23539	0.00535686		A_66_P137462	Nsdhl	2.20139	0.015824		A_66_P134984	Gm15441	-3.79208	0.0309713
A_66_P133148	Aoah	5.08949	0.0108983		A_66_P129153	Ptk6	6.65335	0.000476144		A_66_P137268	Abcc6	-15.0089	0.000499227		A_66_P134854	Nlrp9b	2.07444	0.0273468
A_66_P132888	Dhfr	-5.13693	0.000426135		A_66_P128918	Hacl1	-3.12402	0.000758282		A_66_P137048	Men1	-2.25513	0.0382521		A_66_P134394	Pde6c	-2.72255	0.0239982
A_66_P132846	Exosc1	2.0908	4.29445e-05		A_66_P128453		2.1737	0.0243048		A_66_P136813	6030408B16Rik	4.33785	0.0260679		A_66_P133525		-5.69947	0.00245464
A_66_P132832	Myzap	-2.14449	0.0148745		A_66_P128345	Slc5a11	-8.43109	0.00906944		A_66_P136714	Scpep1	2.86282	0.00087761		A_66_P133383	C030048H21Rik	-3.64829	0.0180487
A_66_P132515	Chmp4c	-3.1621	0.000501454		A_66_P127411	Acat2	-2.17252	0.00316758		A_66_P136569		-3.65188	0.0214321		A_66_P133269	Hesx1	9.6747	0.00181469
A_66_P132249	Akr1c13	-3.26958	0.00704663		A_66_P127160	Eif2b3	2.45297	0.00019382		A_66_P136489	Gm9456	-2.04777	0.00574513		A_66_P132888	Dhfr	-4.25776	0.000155825
A_66_P131406	Gm10099	6.15515	0.00182665		A_66_P125777	Slc43a2	-3.7998	0.00448277		A_66_P136097	Trim13	2.20597	0.00308205		A_66_P132621	Olfr532	-4.80362	0.00465182
A_66_P131389	Ugt2b38	-88.571	0.00040534		A_66_P125734	Tnip2	2.19541	1.9327e-05		A_66_P135941	Fam221a	-2.30089	0.00621165		A_66_P132515	Chmp4c	-2.64753	0.000676593
A_66_P130612	2810408A11Rik	-3.97513	0.000916435		A_66_P124858	Diras2	-2.66849	0.0181054		A_66_P135885	Olfr671	2.3909	0.0499031		A_66_P132249	Akr1c13	-2.31226	0.0236866
A_66_P130213		5.45268	0.013725		A_66_P124669	A730020E08Rik	3.4628	0.0140427		A_66_P135870	Nlrp9b	-4.60417	0.0117863		A_66_P131494	LOC668306	-3.75687	0.00346007
A_66_P129873	Npm1	2.00736	0.00217652		A_66_P124164		2.65999	0.00266572		A_66_P135700	Cyp2d11	-35.4735	0.000136301		A_66_P131433		2.70881	0.00237766
A_66_P129484	Tmed9	2.32092	0.000476128		A_66_P123683	Nabp1	2.09033	0.00134004		A_66_P135651	Capn9	-12.0873	0.00250934		A_66_P131406	Gm10099	9.88468	0.000149372
A_66_P129209	Gm12511	-2.56017	0.00831683		A_66_P122883	Pde8a	2.23666	0.04738		A_66_P135403	AI481877	4.99891	0.0135736		A_66_P131389	Ugt2b38	-105.063	0.000503132
A_66_P129153	Ptk6	6.52581	0.000464274		A_66_P122758	Tsr1	2.22684	0.000546389		A_66_P135194	Yrdc	2.75673	0.00368495		A_66_P130612	2810408A11Rik	-4.24907	0.000575648
A_66_P129111	Nasp	2.24945	0.0119292		A_66_P122511	Cldn2	2.98097	0.00069332		A_66_P135106	Slco3a1	7.08605	0.000663846		A_66_P130432	Cd80	2.40048	0.0284869
A_66_P128963	Cyp2d9	-2.27578	0.0457371		A_66_P122227	Gm10790	-2.28912	0.0249931		A_66_P134854	Nlrp9b	-5.45065	0.0115872		A_66_P130213		4.15617	0.0229537
A_66_P128918	Hacl1	-4.31036	0.000661439		A_66_P122086	9030619P08Rik	2.60256	0.00223103		A_66_P134704	Gm4952	-3.49306	0.000459236		A_66_P129873	Npm1	2.03701	0.00105857
A_66_P128702	Nup43	2.15064	0.000495946		A_66_P121782	Igh-VJ558	-2.22902	0.0230171		A_66_P134690	Spin1	2.26625	0.0382791		A_66_P129209	Gm12511	-2.4871	0.0223458
A_66_P128345	Slc5a11	-16.2348	0.00101206		A_66_P121502	Gm5485	-14.8402	0.000605554		A_66_P134501	Olfm1	2.36945	0.00430926		A_66_P129153	Ptk6	5.58671	0.000550275
A_66_P127411	Acat2	-2.18344	0.00611367		A_66_P121495	Psat1	6.01975	0.000782704		A_66_P134474	Ang3	-2.45788	0.00936963		A_66_P129145	1700012O15Rik	-2.40138	0.0366667
A_66_P127160	Eif2b3	2.71179	5.31115e-06		A_66_P121480	Sardh	-2.68155	4.87063e-05		A_66_P134457	Sntg1	2.462	0.0119335		A_66_P128931	Aldh1l1	2.54816	0.00276645
A_66_P126842	AA415398	-2.12092	0.00498596		A_66_P121369	Gars	2.02314	0.00119659		A_66_P134412	Mettl25	2.67272	0.00185689		A_66_P128918	Hacl1	-3.50428	0.00105371
A_66_P125777	Slc43a2	-5.46255	0.000847371		A_66_P121110	Pck1	-56.7036	0.000204142		A_66_P134405	Axin2	-5.53107	0.0157243		A_66_P128525	Slfn5	4.14045	0.0213619
A_66_P125734	Tnip2	2.80842	1.26258e-05		A_66_P121086	Map3k8	2.56858	0.00361723		A_66_P133525		-3.29768	0.00758698		A_66_P128453		2.18824	0.00119293
A_66_P125722	Cyb5	-2.11552	0.00144592		A_66_P120125	D0H4S114	-2.66466	0.00960882		A_66_P133520	Glmn	2.55166	0.0011805		A_66_P128345	Slc5a11	-59.8123	0.00084408
A_66_P125327	Ccne1	2.21919	0.0111961		A_66_P118906	Adora2b	-2.67608	0.0117391		A_66_P133397	Chi3l4	32.2598	0.00293996		A_66_P127160	Eif2b3	2.10783	0.000214448
A_66_P124858	Diras2	-4.15173	0.00331984		A_66_P118600	Lama1	2.25524	0.00167748		A_66_P133383	C030048H21Rik	-4.64017	0.0111826		A_66_P127022	Iqck	-2.32974	0.012945
A_66_P124669	A730020E08Rik	2.35763	0.00905541		A_66_P117543		2.79285	0.0448856		A_66_P133270	Mfsd1	2.13361	0.0164724		A_66_P127007	Gm12273	-2.22897	0.0338228
A_66_P124549	H13	2.10297	0.00083113		A_66_P117477	Dlk1	-2.29431	0.0101908		A_66_P133269	Hesx1	12.1758	0.00185934		A_66_P126877	Vmn1r214	2.9643	0.0439755
A_66_P124420		-4.4405	0.0239662		A_66_P116678	Rps8	2.71708	0.00185658		A_66_P133255	Prkch	3.0743	0.0111226		A_66_P126293	Itgb3	2.04028	0.0402576
A_66_P124164		2.20046	0.0103674		A_66_P116252	Dusp16	-2.69041	0.0041168		A_66_P133225	Ppip5k1	-2.44803	0.00118942		A_66_P125828		-2.7494	0.0435909
A_66_P124114	Adamts17	3.42602	0.0020273		A_66_P115757	Mthfd2l	2.0749	0.00124574		A_66_P133204	Ankrd50	2.15702	0.0499157		A_66_P125777	Slc43a2	-9.92227	0.000431879
A_66_P123635	Csf2rb	2.09242	0.000806417		A_66_P115609	AU040096	2.56441	0.00623563		A_66_P133148	Aoah	19.1345	0.00136225		A_66_P125734	Tnip2	2.5784	3.17435e-06
A_66_P122758	Tsr1	2.38206	0.000588616		A_66_P114985		-6.75159	0.00104085		A_66_P132890	B930049P21Rik	-2.51756	0.0164539		A_66_P125722	Cyb5	-2.2306	0.00126678
A_66_P122511	Cldn2	3.77097	1.04799e-05		A_66_P114804	Gm7325	-5.39041	0.00146714		A_66_P132888	Dhfr	-3.76787	0.000332448		A_66_P124681	Gxylt2	-2.38297	0.0360325
A_66_P122415	Snhg6	2.12158	0.00436819		A_66_P114722	Pdp2	-2.02724	0.0156248		A_66_P132846	Exosc1	2.05866	0.000342948		A_66_P124669	A730020E08Rik	2.51649	0.00520481
A_66_P122227	Gm10790	-5.1633	0.0112118		A_66_P113268	Mme	-6.83307	0.00890513		A_66_P132550	LOC100503217	-2.81154	0.0139481		A_66_P124179	Atp6v0d2	2.69748	0.0140503
A_66_P122160	Pax6os1	-2.104	0.0381169		A_66_P112573	Isg20	2.05134	0.0149721		A_66_P132515	Chmp4c	-2.85725	0.00127682		A_66_P124164		2.78286	0.000582207
A_66_P122086	9030619P08Rik	2.97537	0.0106539		A_66_P112551	Shf	2.13553	0.0350627		A_66_P132496	Asic3	-2.19712	0.020043		A_66_P124114	Adamts17	2.11234	0.0118644
A_66_P121502	Gm5485	-30.6867	0.000230953		A_66_P111714	Utp20	2.31139	0.00230521		A_66_P132448	Gnpnat1	2.55447	0.00151768		A_66_P123812	Olfr168	-2.12814	0.0183693
A_66_P121495	Psat1	8.58005	0.000493549		A_66_P111562	Ccnd1	2.85348	0.00102013		A_66_P132249	Akr1c13	-2.48065	0.0184276		A_66_P123683	Nabp1	2.47592	0.0023674
A_66_P121480	Sardh	-3.86176	0.000448722		A_66_P111426	Lce1a2	2.43595	0.0300177		A_66_P131754	Vwa5a	-3.33785	0.00389892		A_66_P123324		-7.79869	0.03478
A_66_P121369	Gars	2.4585	0.00135493		A_66_P110425	Kif6	-2.48564	0.0213945		A_66_P131406	Gm10099	5.88034	0.000449951		A_66_P123209	Vmn1r56	-2.13283	0.00696803
A_66_P121288	Tceal6	-2.17337	0.0134245		A_66_P110343	Snx10	2.37314	0.0160374		A_66_P131389	Ugt2b38	-114.618	0.000227561		A_66_P122883	Pde8a	2.90135	0.0220893
A_66_P121110	Pck1	-55.9752	0.000114221		A_66_P110167	Trim38	-9.83058	0.00258333		A_66_P131323	Tmem236	-3.36161	0.000126881		A_66_P122511	Cldn2	2.7212	0.000240155
A_66_P121086	Map3k8	3.13628	0.00662416		A_66_P110016	Ncf2	2.39458	0.00921434		A_66_P130887	Pcdh18	-3.0327	0.00187457		A_66_P122227	Gm10790	-8.25102	0.000491007
A_66_P120507	Plcd3	2.40276	0.0119771		A_66_P109786	4930528H21Rik	-8.53668	0.00188812		A_66_P130855		-3.70507	0.0140524		A_66_P122160	Pax6os1	-3.02816	0.00179005
A_66_P120125	D0H4S114	-4.16312	0.00185393		A_66_P109681		6.29454	0.000289376		A_66_P130612	2810408A11Rik	-6.00911	0.00259895		A_66_P122086	9030619P08Rik	5.81626	6.60362e-05
A_66_P119859		-2.14365	0.0411916		A_66_P109460	Mtfr2	2.86292	0.000689146		A_66_P130601	Foxp2	-2.92902	0.0470552		A_66_P121862	1700001K23Rik	-3.12477	0.025764
A_66_P119801	Optn	-2.59419	0.0111669		A_66_P109183	Apold1	2.25036	0.0289046		A_66_P130432	Cd80	9.84301	0.00119737		A_66_P121782	Igh-VJ558	-2.98973	0.0183416
A_66_P119550	Olfr607	2.4204	0.0470563		A_66_P108770	Oxct1	2.0238	0.0122286		A_66_P130366	Stk38l	2.56305	0.0156101		A_66_P121502	Gm5485	-12.694	0.000675648
A_66_P118989	Zfp644	-2.03594	0.00322163		A_66_P108723		-3.76593	0.0246298		A_66_P130213		5.43977	0.0111919		A_66_P121495	Psat1	11.0378	0.000102398
A_66_P118906	Adora2b	-2.74116	0.016072		A_66_P108152	Cbr1	-3.18902	0.00244406		A_66_P129710	Pion	3.76782	0.000189152		A_66_P121480	Sardh	-4.88297	0.000520466
A_66_P118863	Ncald	2.34075	0.00120548		A_66_P108059	Ttc39c	-3.98058	0.0104343		A_66_P129564	Ngb	-2.66858	0.0235256		A_66_P121369	Gars	2.64965	7.37019e-05
A_66_P118600	Lama1	2.51662	0.000443978		A_66_P108019	Heatr1	2.47211	0.0010608		A_66_P129484	Tmed9	2.43931	0.000348274		A_66_P121110	Pck1	-62.7829	0.000194947
A_66_P118513	42989	2.30997	0.000546485		A_66_P107703	Smox	2.06116	0.0134756		A_66_P129427		-2.63019	0.037992		A_66_P121086	Map3k8	2.48669	0.00682359
A_66_P117838	Dhx29	2.02487	0.000323187		A_66_P107129	3300005D01Rik	3.00255	0.0149899		A_66_P129209	Gm12511	-3.44233	0.000575195		A_66_P120832	Gm5887	-2.79563	0.0258479
A_66_P117543		3.40478	0.0255962		A_66_P106744	Syce3	-2.7746	0.00247557		A_66_P129153	Ptk6	3.32151	0.00589017		A_66_P120736	Bnip3	2.06689	0.00785836
A_66_P117477	Dlk1	-2.05406	0.0292947		A_66_P106661	Slc7a1	2.28873	0.00410161		A_66_P129085	C2cd3	-2.10964	0.00824835		A_66_P120682	4930544D05Rik	-2.03129	0.0227225
A_66_P116678	Rps8	3.56532	0.00115548		A_66_P106388	Ms4a4c	3.34317	0.0236294		A_66_P128997	Pml	-3.36761	0.0013745		A_66_P120612	Vax2os1	-2.1304	0.00896245
A_66_P116542		-2.22151	0.00709715		A_66_P105175	Bche	-2.13139	0.0384468		A_66_P128963	Cyp2d9	-2.09072	0.0132475		A_66_P120507	Plcd3	2.89944	0.0102729
A_66_P116461	Mro	-2.6083	0.00441701		A_66_P104473	Polg2	-2.26358	0.00114791		A_66_P128942	Mipep	-4.5177	0.00313196		A_66_P120277	9330182L06Rik	-2.87755	0.00201501
A_66_P116252	Dusp16	-2.35174	0.00969291		A_66_P104119	Tas2r143	2.68971	0.00202279		A_66_P128918	Hacl1	-4.43204	0.0117447		A_66_P120125	D0H4S114	-2.79034	0.00252015
A_66_P116250	Efhd2	2.05434	0.0090533		A_66_P102879	Thra	-2.32894	0.0092		A_66_P128537	Isg15	-6.73254	0.0214284		A_66_P119859		-2.27617	0.00411858
A_66_P115959	1700016H13Rik	-2.37728	0.017124		A_66_P102528	Tspan5	-2.76315	0.00979966		A_66_P128445	Bend7	-2.31491	0.0237885		A_66_P118906	Adora2b	-3.07088	0.010092
A_66_P115757	Mthfd2l	2.43605	0.000239197		A_66_P101835	Cd38	3.26966	0.00145785		A_66_P128442	Rimbp3	-3.19614	0.014945		A_66_P118600	Lama1	3.52466	0.000419968
A_66_P115693	Rnf207	-2.12203	0.0430807		A_66_P101707	Adam4	-2.66922	0.0019343		A_66_P128345	Slc5a11	-71.2648	1.461e-05		A_66_P118513	42989	2.06501	0.000673777
A_66_P115513	D730003I15Rik	-2.01303	0.0168702		A_66_P101407	Acat3	-2.5084	0.0118817		A_66_P128128		-2.13608	0.00184191		A_66_P118091	Tor3a	2.45124	0.0051203
A_66_P115378	Orc2	2.02531	0.000424156		A_66_P100696	Slc26a2	-2.69804	0.00957547		A_66_P127464	Zbed4	2.08883	0.0273002		A_66_P117610	Gm16894	-2.02841	0.0245609
A_66_P115323	Cirh1a	2.1774	0.000493379		A_65_P20174	Phf17	-2.04763	0.00358978		A_66_P127411	Acat2	2.26428	0.0147891		A_66_P117543		3.23047	0.0274256
A_66_P115034	Bend5	-3.15914	0.00201058		A_65_P20167	Hyou1	2.16627	0.00204047		A_66_P127161	Cyp2u1	-4.11705	0.0235666		A_66_P117477	Dlk1	-3.02775	0.00263524
A_66_P114985		-7.62579	0.000408412		A_65_P19881	Tmem92	6.68205	0.0198678		A_66_P127160	Eif2b3	2.16977	0.000675148		A_66_P117294	4933436H12Rik	-2.66099	0.0273895
A_66_P114804	Gm7325	-6.80772	0.00101395		A_65_P19832	Ttr	-3.47268	0.0160839		A_66_P126915	D730003K21Rik	30.3519	0.00157804		A_66_P116678	Rps8	2.60487	0.000542332
A_66_P114585	Mta3	-2.17847	0.033049		A_65_P18981	Palb2	2.28605	0.00385871		A_66_P126819	Gm10851	6.29232	0.00341754		A_66_P116635	Igf2as	-2.51798	0.0316839
A_66_P113268	Mme	-15.7306	0.0036069		A_65_P16483	Pdzk1	-10.7742	0.00554514		A_66_P126686		2.02377	0.000899562		A_66_P116542		-2.56599	0.000676407
A_66_P112773	5730409E04Rik	-4.74161	0.0252843		A_65_P13713	Ank3	-3.73572	0.00330151		A_66_P126640	Car8	-3.84749	0.00199189		A_66_P116461	Mro	-3.51893	0.000632629
A_66_P112551	Shf	3.49687	0.00487308		A_65_P11718	Nol8	2.27298	0.00409148		A_66_P126428	Celf6	-2.39188	0.00473705		A_66_P116326	Tlcd2	-2.50998	0.000773029
A_66_P111714	Utp20	2.66652	0.00109138		A_65_P11011	Gcnt3	5.25621	0.000250919		A_66_P126313	Rhof	2.33663	0.00256602		A_66_P116300		-3.19711	0.0373762
A_66_P111562	Ccnd1	3.06498	0.000337842		A_65_P10351	Atp2b1	-3.13649	0.0114623		A_66_P126293	Itgb3	5.03092	0.00258481		A_66_P116263	Gas2l2	-4.10778	1.80686e-05
A_66_P111426	Lce1a2	2.38427	0.013551		A_65_P09032	Rab43	-2.28384	0.00174693		A_66_P126147	Spink5	5.76225	4.98475e-05		A_66_P116252	Dusp16	-2.52966	0.00538954
A_66_P111090	Sctr	-2.68379	0.0150005		A_65_P08768	Fbln1	-3.06866	0.0397753		A_66_P126094	Pycrl	-2.69206	0.00705588		A_66_P115996	Ccbl1	-2.40993	0.000261947
A_66_P111011	Gata3	7.68135	0.0018604		A_65_P06446	Tfrc	2.28789	0.00780587		A_66_P125962	Hipk1	2.97765	0.0040696		A_66_P115959	1700016H13Rik	-2.63607	0.00359031
A_66_P110490	Polr3h	2.17331	0.000132878		A_65_P05803		3.50981	8.47938e-05		A_66_P125777	Slc43a2	-10.5711	0.000268116		A_66_P115757	Mthfd2l	2.16524	0.000231781
A_66_P110425	Kif6	-4.12626	0.000674096		A_65_P03874	Nav2	-2.36833	0.0469285		A_66_P125734	Tnip2	4.72003	0.000573709		A_66_P115734		-2.19558	0.0462054
A_66_P110343	Snx10	3.52256	0.00193359		A_65_P02177	Gstm4	-10.4847	0.000910755		A_66_P125722	Cyb5	-2.6581	0.000690918		A_66_P115609	AU040096	2.12287	0.0102845
A_66_P110212	Gm15232	-2.19477	0.0115485		A_65_P01991	Prrg4	3.82783	0.0087782		A_66_P125392	Atp8b4	3.13481	0.0173348		A_66_P115034	Bend5	-3.0137	0.0047627
A_66_P110167	Trim38	-15.7416	0.000620232		A_55_P2465382		2.98706	0.00224099		A_66_P125035	Duxbl2	2.57574	0.0133949		A_66_P114985		-12.1988	0.000169469
A_66_P110016	Ncf2	2.03279	0.0421388		A_55_P2462358	Fam118b	2.20518	0.00464939		A_66_P124858	Diras2	-5.03789	0.00163617		A_66_P114804	Gm7325	-9.66804	0.0188979
A_66_P109786	4930528H21Rik	-6.01431	0.0132194		A_55_P2459006	Agphd1	-6.09565	0.0156672		A_66_P124822	Sptssb	10.4802	0.0243396		A_66_P114722	Pdp2	-2.27436	6.38915e-05
A_66_P109708	Il1f6	6.49792	0.00223254		A_55_P2448776	Mdn1	2.08463	0.00766576		A_66_P124732	Zfp606	-2.741	0.00912441		A_66_P114589	4930597O21Rik	-2.52445	0.0437638
A_66_P109681		31.531	5.36911e-05		A_55_P2439712	Ddhd2	-2.57157	0.00253752		A_66_P124715	Ppard	-2.12835	0.0107688		A_66_P114585	Mta3	-2.29439	0.00160062
A_66_P109460	Mtfr2	2.54319	0.00080408		A_55_P2431897	Thap6	12.1522	0.00716695		A_66_P124659	Mark1	2.27387	0.0379961		A_66_P114333	Tlr12	-2.35959	0.0118197
A_66_P109183	Apold1	3.12194	0.000116754		A_55_P2427150	C430002N11Rik	-6.12967	0.0011645		A_66_P124549	H13	2.61127	2.86355e-05		A_66_P114295		-2.27441	0.0391304
A_66_P108999	Tcrg-V7	-2.49976	0.0398388		A_55_P2426941	Gprin3	-2.41485	0.00254751		A_66_P124179	Atp6v0d2	44.8431	8.85014e-05		A_66_P114042	Kctd7	-2.66932	0.00132446
A_66_P108910	Xpnpep2	-2.88249	0.00500571		A_55_P2426564	1500004A13Rik	-2.75365	0.0202641		A_66_P124164		4.50988	0.000255932		A_66_P113268	Mme	-23.7002	0.00173245
A_66_P108723		-4.05436	0.0258338		A_55_P2422164	C130093G08Rik	-6.59292	0.00604893		A_66_P124114	Adamts17	3.76194	0.000869079		A_66_P113008	Pla2g2e	2.83955	0.0459833
A_66_P108380	A330021E22Rik	3.30096	0.0305488		A_55_P2420694		-4.24378	0.0223749		A_66_P124091	Chrdl1	-2.89679	0.0346591		A_66_P112919	Ppyr1	-3.3736	0.0104314
A_66_P108152	Cbr1	-4.68281	0.000950413		A_55_P2419495	1110028F11Rik	-2.62447	0.0156723		A_66_P123635	Csf2rb	4.12309	2.17731e-05		A_66_P112816	B4galt6	-2.0811	0.0301582
A_66_P108059	Ttc39c	-6.917	0.00372498		A_55_P2419091	2810449G22Rik	2.21892	0.0256417		A_66_P123617	Lmod1	-6.04504	0.000670933		A_66_P112573	Isg20	2.60373	0.00676229
A_66_P108019	Heatr1	2.5146	0.000215135		A_55_P2417434	E130215H24Rik	-2.61877	0.00206477		A_66_P123432	4930447J18Rik	2.52333	0.0300107		A_66_P112551	Shf	2.73704	0.0101511
A_66_P108003	Espn	-2.17075	0.00954441		A_55_P2415472	4931408D14Rik	-2.96828	0.0149442		A_66_P123324		-6.62806	0.0465833		A_66_P111747	Pgk1	2.19781	0.000771297
A_66_P107703	Smox	2.72434	0.00509682		A_55_P2414475	AW552393	-5.32413	0.0424355		A_66_P123155	Ddo	-2.88447	0.0102013		A_66_P111714	Utp20	2.06635	0.0057257
A_66_P107379	Mdk	-2.09125	0.00261825		A_55_P2414159	Vwa2	2.21037	0.013416		A_66_P122883	Pde8a	3.00039	0.0433567		A_66_P111660	Mt1	-2.06219	0.00282897
A_66_P107129	3300005D01Rik	3.2449	0.0134047		A_55_P2412349	AW111846	-8.81563	0.00442915		A_66_P122621	Gm9889	7.4738	0.0192507		A_66_P111562	Ccnd1	2.4415	0.0012679
A_66_P106744	Syce3	-5.08868	0.000610088		A_55_P2412319	A830052D11Rik	-2.63512	0.00264315		A_66_P122551	Ikzf2	-3.28622	0.0117426		A_66_P111426	Lce1a2	2.018	0.00983313
A_66_P106661	Slc7a1	2.75995	5.04336e-05		A_55_P2407367	9130001E16Rik	-5.91588	0.00179369		A_66_P122511	Cldn2	4.09503	8.72159e-05		A_66_P111285	Pdp2	-2.03751	0.00450665
A_66_P106478	Cct3	2.18075	0.000460826		A_55_P2404658	Gm17501	-3.27706	0.0344433		A_66_P122415	Snhg6	3.05726	0.000285768		A_66_P111163	Trav14n-1	-2.55706	0.00964493
A_66_P106388	Ms4a4c	3.66022	0.0197879		A_55_P2394308	Fst	-3.91013	0.00062117		A_66_P122227	Gm10790	-7.97245	0.00194192		A_66_P111090	Sctr	-2.81634	0.0375222
A_66_P105175	Bche	-2.35996	0.0287801		A_55_P2389818		-2.02263	0.0196988		A_66_P122219	Kcnd3	-2.39094	0.0439575		A_66_P111011	Gata3	7.73853	0.0112407
A_66_P105075	Mmp11	-2.91107	8.1705e-05		A_55_P2389435	Tiaf2	-3.88189	0.0134084		A_66_P122086	9030619P08Rik	11.1858	6.85895e-06		A_66_P110425	Kif6	-7.12878	0.000141724
A_66_P104473	Polg2	-2.61892	0.000474383		A_55_P2388687	1700003G18Rik	6.64638	0.0262183		A_66_P122060	4833418N02Rik	2.70385	0.0188009		A_66_P110343	Snx10	3.47006	0.00166185
A_66_P104422	Ckap4	2.14816	0.00337418		A_55_P2387515	9130208D14Rik	-3.3863	0.00962008		A_66_P121976	Slc4a11	4.47212	0.0101989		A_66_P110212	Gm15232	-2.43045	0.00783637
A_66_P104118		2.25109	0.000490172		A_55_P2382741	AI314604	-2.17312	0.00622804		A_66_P121787	Samd9l	-2.65281	0.0138972		A_66_P110199	5330434G04Rik	-2.41056	0.0367742
A_66_P103198	2210017I01Rik	2.87061	0.0236597		A_55_P2379719	D130050E23Rik	2.84369	0.0369333		A_66_P121782	Igh-VJ558	-4.72604	0.0164316		A_66_P110167	Trim38	-25.7433	0.000373763
A_66_P102879	Thra	-2.47341	0.00189356		A_55_P2377156		-3.89136	0.0321195		A_66_P121590	Prss22	97.0438	0.000413357		A_66_P109802	Ces3b	-2.44333	0.0235127
A_66_P102528	Tspan5	-2.27212	0.0301347		A_55_P2374162	4930542N06Rik	-3.327	0.0260606		A_66_P121502	Gm5485	-39.5973	0.00016463		A_66_P109786	4930528H21Rik	-6.26172	0.00335236
A_66_P102395	Elac2	2.15271	4.90929e-05		A_55_P2371879	Gcap8	-3.80929	0.00317793		A_66_P121495	Psat1	8.84256	0.000547425		A_66_P109708	Il1f6	2.13772	0.0298989
A_66_P102049	Zfp1	2.1017	0.000526202		A_55_P2363652		-2.78229	0.0255477		A_66_P121480	Sardh	-9.30302	3.68226e-06		A_66_P109681		5.49305	0.00171036
A_66_P101835	Cd38	3.51586	5.78879e-05		A_55_P2363030	Cmtm4	-2.22858	0.00476482		A_66_P121369	Gars	2.52326	0.000270671		A_66_P109460	Mtfr2	2.87271	0.03053
A_66_P101724	Fam124a	-3.07525	0.0423221		A_55_P2362635	Slc9a3	2.24169	0.00224469		A_66_P121110	Pck1	-50.3658	0.000170181		A_66_P109183	Apold1	2.92425	0.000155689
A_66_P101707	Adam4	-2.80764	0.00155427		A_55_P2361652	LOC101056045	2.38814	0.0420832		A_66_P121086	Map3k8	8.65892	0.000391444		A_66_P108999	Tcrg-V7	-3.74291	0.0180877
A_66_P101664	Scai	-2.0324	0.0128252		A_55_P2353743	Gm2447	5.81768	0.0305431		A_66_P121039	Avpr1b	-2.75377	0.0298285		A_66_P108910	Xpnpep2	-5.91936	0.00847877
A_66_P101423	Ogfod3	-2.25664	0.00444496		A_55_P2350617	Slc37a2	-11.2464	0.00109064		A_66_P120901	Atxn10	2.372	0.00515244		A_66_P108770	Oxct1	2.10616	0.00117669
A_66_P101407	Acat3	-2.19129	0.0255249		A_55_P2345916	2510016G02Rik	-2.0213	0.00852717		A_66_P120736	Bnip3	2.08234	0.000189581		A_66_P108603	E030018B13Rik	-3.42202	0.0185928
A_66_P101261	Gm3367	5.50407	0.00753497		A_55_P2345425	Sat2	-2.84666	0.00182973		A_66_P120603	Trps1	2.19144	0.00836211		A_66_P108380	A330021E22Rik	4.34543	0.0268244
A_66_P100765	Dao	-2.21281	0.0027596		A_55_P2344804	C87490	6.46046	0.0107841		A_66_P120567	Anxa1	4.58698	0.003421		A_66_P108153	Hist3h2bb-ps	-3.12214	0.0242338
A_66_P100696	Slc26a2	-3.7684	0.00360952		A_55_P2337074	Mid1	2.64934	0.00747422		A_66_P120507	Plcd3	12.941	0.00381496		A_66_P108152	Cbr1	-4.06694	0.0012096
A_66_P100365		2.00051	0.00444327		A_55_P2337073	Mid1	2.77965	0.0352921		A_66_P120472	Pglyrp2	-2.5925	0.00374175		A_66_P108059	Ttc39c	-10.2671	0.00198395
A_65_P20167	Hyou1	2.40863	0.0042195		A_55_P2336943	Atpbd4	2.00009	0.00209001		A_66_P120380	Apol10b	-28.1283	5.81605e-05		A_66_P108019	Heatr1	2.24784	0.0003954
A_65_P19881	Tmem92	8.36209	0.00730851		A_55_P2332926	2810037O22Rik	-3.93966	0.00635525		A_66_P120249	Nr1h3	-2.69128	0.00836934		A_66_P107760		-2.40295	0.00652971
A_65_P19832	Ttr	-3.65683	0.00994811		A_55_P2331546	D830026I12Rik	-2.73864	0.00115916		A_66_P120208	Cnnm3	-2.27075	0.00390513		A_66_P107703	Smox	3.4024	0.00178448
A_65_P18981	Palb2	2.29661	0.00600866		A_55_P2330215	A730090N16Rik	2.06974	0.0363557		A_66_P120125	D0H4S114	-2.19432	0.0119678		A_66_P107129	3300005D01Rik	4.8493	0.0024125
A_65_P16483	Pdzk1	-23.9285	0.00169091		A_55_P2325803	Tnfrsf11a	-3.23232	2.36986e-06		A_66_P119968	Clec4a1	2.52615	0.0207288		A_66_P106744	Syce3	-4.19131	0.000316163
A_65_P16208	Baz1a	2.06671	0.000873147		A_55_P2322507	A130042O14Rik	-3.89863	0.0146292		A_66_P119884	Wdr91	4.20091	0.000379044		A_66_P106661	Slc7a1	2.21447	0.000234659
A_65_P13713	Ank3	-5.80329	0.00114126		A_55_P2318584	Aqp8	-118.183	0.000173538		A_66_P119859		2.91514	0.0356742		A_66_P106525	AI427809	-2.28351	0.00766706
A_65_P11718	Nol8	2.76125	0.00146052		A_55_P2316612	6720407P12Rik	-2.1433	0.0188308		A_66_P119810	H2afb1	-2.3663	0.00019165		A_66_P106388	Ms4a4c	3.62486	0.0180768
A_65_P11011	Gcnt3	4.65147	2.06351e-05		A_55_P2309100	Ky	-9.69282	0.000881738		A_66_P119801	Optn	-3.27063	0.0066467		A_66_P105350	Cacna2d4	-2.13893	0.0473674
A_65_P10673	Tmem44	-2.1409	0.029604		A_55_P2305339	6720427H10Rik	-2.52437	0.0203559		A_66_P119518	Tuba8	2.76102	0.0285426		A_66_P105175	Bche	-2.1738	0.0315799
A_65_P10351	Atp2b1	-3.42015	0.00423769		A_55_P2304864	Ros1	-3.7679	0.00753392		A_66_P119191	Inpp5e	-2.0312	0.0159228		A_66_P104747		2.42914	0.0425734
A_65_P09032	Rab43	-2.65851	0.000751911		A_55_P2302290	E230012P03	-2.32347	0.00915666		A_66_P119123	A1cf	-3.72143	0.00259972		A_66_P104473	Polg2	-2.0919	0.00078999
A_65_P08776	Zfp937	-2.41726	0.0351944		A_55_P2295691	9430083A17Rik	-2.04764	0.0189756		A_66_P119034	Pla2g7	5.09069	1.01577e-05		A_66_P104422	Ckap4	2.09375	0.00165229
A_65_P08768	Fbln1	-3.72865	0.0203277		A_55_P2293013	Ces2a	-8.1116	0.00533015		A_66_P118934	Plaa	2.64868	0.00146054		A_66_P104296	1700112E06Rik	-2.06042	0.00616938
A_65_P06453	Nup35	2.06033	0.000452222		A_55_P2289770	Scamp1	-2.77923	0.0413577		A_66_P118906	Adora2b	-2.23809	0.0266423		A_66_P104119	Tas2r143	3.15394	0.000573662
A_65_P06446	Tfrc	2.31321	0.0040919		A_55_P2288285	2310007J06Rik	-3.20491	0.00170736		A_66_P118849	2310034G01Rik	5.20281	0.00124475		A_66_P104079	Gm9903	-3.8971	0.0217614
A_65_P06029	Fam171b	-3.23201	0.027355		A_55_P2287910	Rragd	-2.24172	0.00757875		A_66_P118772	Tmem136	-2.08791	0.0486363		A_66_P103780	Gm3646	-2.73728	0.0480284
A_65_P05803		4.93987	0.000400029		A_55_P2287760	0610038L08Rik	-11.5142	0.00177133		A_66_P118600	Lama1	5.10171	0.000175115		A_66_P103198	2210017I01Rik	2.32676	0.0184781
A_65_P02177	Gstm4	-16.6015	0.000437902		A_55_P2286493	4933405E24Rik	-2.57484	0.0259005		A_66_P118513	42989	2.04077	0.00110885		A_66_P102919		-2.03721	0.011933
A_65_P01991	Prrg4	5.73562	0.000600973		A_55_P2283764	Gm10732	-2.65551	0.0191341		A_66_P118394		4.11754	0.0429178		A_66_P102879	Thra	-3.02674	0.00314654
A_65_P01319	Pde4b	2.56672	0.00105395		A_55_P2282984	6030443J06Rik	7.74212	0.0208151		A_66_P118124	Fxyd3	5.81537	0.000131469		A_66_P102528	Tspan5	-2.68093	0.00999162
A_55_P2465382		2.31885	0.00663497		A_55_P2279927	Katnal1	-2.18631	0.0320491		A_66_P118091	Tor3a	-2.39882	0.00633362		A_66_P102260	Irs2	-2.51172	0.0296762
A_55_P2462377	Nsf	2.188	0.00996428		A_55_P2278551	1700037F03Rik	-2.15119	0.000556646		A_66_P118011	Rnf38	2.11659	0.0349407		A_66_P102143		-6.45644	0.0306394
A_55_P2462358	Fam118b	2.47693	0.00181209		A_55_P2273656		-2.30367	0.00345257		A_66_P117933	I830012O16Rik	-4.81645	0.0480649		A_66_P102049	Zfp1	2.2647	0.00517501
A_55_P2459006	Agphd1	-4.38143	0.0013041		A_55_P2269626	D130019J16Rik	-3.10029	0.0429639		A_66_P117417	Pvrl3	-2.18468	0.00129957		A_66_P101879	Cyp2u1	-2.07473	0.0336082
A_55_P2448776	Mdn1	2.53957	0.00416651		A_55_P2269254	5730419F03Rik	-2.49544	0.00916867		A_66_P117201	Fgf4	-3.15297	0.000419689		A_66_P101835	Cd38	3.20599	0.000651748
A_55_P2442017	Samd8	-2.18204	0.00919208		A_55_P2262743	Gm671	2.09539	0.0444988		A_66_P116812		-3.90623	0.000220376		A_66_P101707	Adam4	-2.07151	0.00286542
A_55_P2439712	Ddhd2	-3.25156	0.000286872		A_55_P2257381	E330011O21Rik	-2.07588	0.00184341		A_66_P116683	D630010B17Rik	2.23963	0.00280332		A_66_P101477	Bglap3	6.52596	0.0477569
A_55_P2431897	Thap6	11.1119	0.00293793		A_55_P2255554	AA763521	52.2841	0.00179167		A_66_P116678	Rps8	3.42232	5.46804e-05		A_66_P101423	Ogfod3	-2.18265	0.00483329
A_55_P2430122	Ilf2	2.1852	0.00237731		A_55_P2250943	1700024h08rik	-7.25237	0.000454799		A_66_P116542		-3.10462	0.0187108		A_66_P101407	Acat3	-2.51075	0.0151105
A_55_P2427150	C430002N11Rik	-4.23783	0.0154196		A_55_P2250192		-3.31745	0.000748735		A_66_P116461	Mro	-3.95284	0.000151401		A_66_P101261	Gm3367	6.346	0.00571836
A_55_P2426941	Gprin3	-3.57484	0.000519147		A_55_P2249849	Sema6a	-2.61752	0.00346956		A_66_P116451	2210039B01Rik	2.79433	5.15459e-05		A_66_P100765	Dao	-2.95163	0.00118476
A_55_P2422650	5031425E22Rik	-2.62118	0.00412323		A_55_P2242094	Gm10494	-3.02748	0.0428853		A_66_P116372	Soat2	-2.91117	0.00349149		A_66_P100761	1810019N24Rik	-3.27141	0.000855199
A_55_P2422164	C130093G08Rik	-10.9226	0.000139953		A_55_P2238933	5031415H12Rik	-3.26342	0.00760154		A_66_P116326	Tlcd2	-3.89099	0.00566846		A_66_P100696	Slc26a2	-3.27328	0.00719876
A_55_P2420694		-4.89632	0.0350668		A_55_P2236291	Ppap2a	-3.27465	0.000455024		A_66_P116250	Efhd2	4.74754	0.00167672		A_66_P100586		2.17433	0.00657866
A_55_P2419495	1110028F11Rik	-3.06504	0.0119146		A_55_P2233547	9130214F15Rik	-2.11666	0.00553878		A_66_P116173	Il23r	4.41577	0.0452836		A_65_P20174	Phf17	-2.14378	0.00244433
A_55_P2417434	E130215H24Rik	-2.53353	0.00218928		A_55_P2228097	Gabrg3	-2.71813	0.0271316		A_66_P115808	Airn	-3.30608	0.0140326		A_65_P19881	Tmem92	7.17507	0.00940712
A_55_P2416494	8430426J06Rik	-2.08175	0.0449687		A_55_P2227217	1700123M08Rik	-2.33168	0.0348555		A_66_P115757	Mthfd2l	3.47659	0.000152726		A_65_P19832	Ttr	-2.87516	0.0374239
A_55_P2416097	A130082J08Rik	2.07355	0.0489374		A_55_P2219257	5830405M20Rik	2.16548	0.0116821		A_66_P115693	Rnf207	-3.0546	0.00914667		A_65_P19089	Esrrg	-2.01857	0.00853344
A_55_P2415472	4931408D14Rik	-2.51864	0.0447739		A_55_P2217831	2900054C01Rik	3.2646	0.00210485		A_66_P115623	G630018N14Rik	-44.5149	0.0127653		A_65_P16483	Pdzk1	-31.0349	0.000577706
A_55_P2414707	4732463B04Rik	2.29962	0.0366565		A_55_P2216822		-2.08728	0.0246807		A_66_P115531	Crebzf	-3.0532	0.0169076		A_65_P13713	Ank3	-4.93651	0.00201054
A_55_P2414159	Vwa2	2.29208	0.000837231		A_55_P2213209	LOC269472	25.3687	0.0015952		A_66_P115452	Gm6687	2.85733	0.0358955		A_65_P11718	Nol8	2.28221	0.00408675
A_55_P2412349	AW111846	-13.3625	0.00117725		A_55_P2208836	4930432N10Rik	3.13764	0.00524056		A_66_P115378	Orc2	2.97485	4.69791e-05		A_65_P11326	Col6a4	-2.25571	0.00463755
A_55_P2412319	A830052D11Rik	-2.58005	0.000705356		A_55_P2207342	LOC101056197	-2.20015	0.0216354		A_66_P115323	Cirh1a	2.60316	0.00076854		A_65_P11011	Gcnt3	5.42644	1.53262e-05
A_55_P2407367	9130001E16Rik	-3.85622	0.0253709		A_55_P2207335	Nron	2.03485	0.0320372		A_66_P115034	Bend5	-5.00015	7.07812e-06		A_65_P10351	Atp2b1	-4.16637	0.00357151
A_55_P2404808	2210406H18Rik	2.60249	0.000163499		A_55_P2206491	1810062O18Rik	-3.9239	0.000810492		A_66_P114985		-11.3203	0.00186226		A_65_P09032	Rab43	-2.02688	0.00414669
A_55_P2404554		-7.2378	0.00989588		A_55_P2205156	Aamdc	-2.12328	0.00230277		A_66_P114804	Gm7325	-2.9966	0.0235648		A_65_P08776	Zfp937	-2.90592	0.0177731
A_55_P2403769	Slc5a12	-16.4265	0.0460215		A_55_P2201395	2410017I17Rik	2.39487	0.00413438		A_66_P114784	Pla2g7	5.54034	0.000104925		A_65_P08768	Fbln1	-4.96228	0.00895434
A_55_P2398270	5033423O07Rik	2.06293	0.0446179		A_55_P2199917	AU043392	4.70403	0.0223532		A_66_P114627	S100a16	2.38417	0.00139981		A_65_P08727	Adamts18	-2.90987	0.00671952
A_55_P2394308	Fst	-2.03832	0.0189157		A_55_P2199202	Il22	40.688	0.00400994		A_66_P114582		-3.293	0.0261299		A_65_P06446	Tfrc	3.2288	0.00151893
A_55_P2389435	Tiaf2	-5.22202	0.0217379		A_55_P2198983	4930415C11Rik	-10.751	0.00155364		A_66_P114543	Jmjd6	2.11702	0.0016137		A_65_P06147	Fgfr3	-2.78687	0.00026225
A_55_P2389308		-2.14164	0.0154057		A_55_P2198946	Gm10768	-8.3302	0.000416641		A_66_P114381	Ypel2	-2.30906	0.00146026		A_65_P06029	Fam171b	-2.29014	0.0254699
A_55_P2388687	1700003G18Rik	4.93005	0.018445		A_55_P2197638	1110046J04Rik	-2.50701	0.00287199		A_66_P114333	Tlr12	-7.92387	0.00106746		A_65_P05803		3.08925	0.00332346
A_55_P2387865	4930552P12Rik	-2.09046	0.0350178		A_55_P2195202	1700016K05Rik	2.92165	0.0235975		A_66_P114176	Hist2h2ab	-3.53281	0.0161538		A_65_P03874	Nav2	-2.58168	0.010481
A_55_P2387515	9130208D14Rik	-7.2212	0.000906699		A_55_P2193760		-2.57561	0.0181881		A_66_P113760	Acvr2a	-2.23767	0.0047659		A_65_P03442	Pgk1	2.20627	0.000763948
A_55_P2386236	Ceacam2	2.37859	0.00805698		A_55_P2193229	A330032P22Rik	2.04863	0.0480601		A_66_P113749	Il2rg	2.23523	0.000402919		A_65_P02177	Gstm4	-15.3927	0.000641346
A_55_P2382741	AI314604	-3.04648	0.00533718		A_55_P2192961	Trim30b	12.6784	0.00377747		A_66_P113490	Sh2b2	2.99545	0.00534908		A_65_P01991	Prrg4	6.89114	0.000656847
A_55_P2374162	4930542N06Rik	-4.59347	0.00533595		A_55_P2187266	Pop1	2.01527	0.00105219		A_66_P113268	Mme	-465.355	9.05796e-05		A_55_P2465382		3.12651	0.00133653
A_55_P2370160	C130009A20Rik	-2.2134	0.0317473		A_55_P2186929		3.76295	0.0211803		A_66_P113059	Itgb1	2.1351	0.00189145		A_55_P2462358	Fam118b	2.32969	0.00229601
A_55_P2363652		-4.62313	0.00548889		A_55_P2186928		3.92027	0.0155881		A_66_P113008	Pla2g2e	90.0124	3.1473e-05		A_55_P2459006	Agphd1	-5.96625	0.00229745
A_55_P2362635	Slc9a3	2.15919	0.00506764		A_55_P2186644	Bard1	6.99711	0.0125782		A_66_P112664	Rgsl1	6.8621	1.44529e-05		A_55_P2439712	Ddhd2	-2.37511	0.00105473
A_55_P2361547	2610201A13Rik	2.32106	0.000166981		A_55_P2186499	Duoxa1	36.0202	0.00050326		A_66_P112551	Shf	5.0068	0.00330772		A_55_P2431897	Thap6	12.7169	0.000775086
A_55_P2359436	A930026B05Rik	-2.71341	0.0297287		A_55_P2186450		3.31117	0.00667502		A_66_P112482	Tmem184c	2.13465	0.00136361		A_55_P2427150	C430002N11Rik	-8.76947	0.000279157
A_55_P2356736	6720483E21Rik	2.96729	0.00947697		A_55_P2186395		2.12297	0.00070817		A_66_P112234		-4.57952	0.030686		A_55_P2426941	Gprin3	-3.55911	0.000863579
A_55_P2353743	Gm2447	5.24511	0.0288453		A_55_P2185905	Nrg4	-2.54687	0.017015		A_66_P112024	Gm6816	-2.44407	0.00446347		A_55_P2426884		-3.94768	0.00832506
A_55_P2350617	Slc37a2	-30.2794	0.000297704		A_55_P2185900	Nrg4	-2.9025	0.018664		A_66_P112006	H2-T10	-2.92796	0.00404797		A_55_P2425432	1700017I07Rik	-3.95481	0.0172457
A_55_P2350553	4933405D12Rik	-2.19476	0.011304		A_55_P2185826	Cyp3a13	-2.10771	0.0368064		A_66_P111781	4930432M17Rik	-2.02405	0.000747373		A_55_P2423228	AI464196	2.41309	0.000497158
A_55_P2350022	Akap6	-2.58192	0.0162051		A_55_P2185628		2.34606	0.00622301		A_66_P111747	Pgk1	2.2777	0.000677395		A_55_P2422685	9230112J17Rik	-2.46251	0.0487891
A_55_P2349258	Ptk2	2.40101	0.0330832		A_55_P2184108	Gm10589	2.32071	0.0451998		A_66_P111714	Utp20	2.92	0.000178635		A_55_P2422248	5730420D15Rik	-3.35538	0.0457881
A_55_P2348582	4833439F03Rik	-2.30851	0.0436326		A_55_P2184009	Rnd2	-3.14807	0.00750802		A_66_P111689	Gm9372	2.23491	0.0123174		A_55_P2422164	C130093G08Rik	-8.58064	0.000290593
A_55_P2346644	C730037M02Rik	-14.6187	0.00124985		A_55_P2183854	Sctr	16.7258	0.0145834		A_66_P111426	Lce1a2	2.21026	0.00929226		A_55_P2419091	2810449G22Rik	3.79064	0.00578282
A_55_P2345425	Sat2	-3.79197	0.000362562		A_55_P2183513	Gm10614	-3.11772	0.043582		A_66_P111336	Gm10782	5.95164	0.0194029		A_55_P2417434	E130215H24Rik	-2.546	0.00181419
A_55_P2344804	C87490	6.23616	0.0050541		A_55_P2183453	Cldn4	-2.64031	0.000443195		A_66_P111163	Trav14n-1	-2.58838	0.00310853		A_55_P2416494	8430426J06Rik	-2.0747	0.000586643
A_55_P2337074	Mid1	3.19034	0.0048268		A_55_P2183438	Runx1	2.69516	0.000463269		A_66_P111070	Susd1	2.47351	0.00330441		A_55_P2415472	4931408D14Rik	-4.8567	0.00319453
A_55_P2336943	Atpbd4	2.17229	0.000318177		A_55_P2183433	Rab30	-2.24103	0.0466898		A_66_P111049	Prlh	-2.33597	0.00215398		A_55_P2414707	4732463B04Rik	2.94649	0.00553512
A_55_P2336623	E030042N06Rik	-2.2616	0.0237647		A_55_P2182675	Fut7	-3.34619	0.0308707		A_66_P111021	Nlrp6	-3.44877	0.0433654		A_55_P2414534	0610009L18Rik	2.02693	0.0132694
A_55_P2334684	Rsf1	-2.02699	0.000724291		A_55_P2182056	Zfp352	2.75217	0.00191515		A_66_P111011	Gata3	11.5899	0.000628412		A_55_P2414475	AW552393	-7.03078	0.0148056
A_55_P2332926	2810037O22Rik	-5.18821	0.0103996		A_55_P2182026	Tmem252	-2.19168	0.00529569		A_66_P110769	Cabyr	2.60114	0.0246895		A_55_P2412607	E130018N17Rik	-4.74767	0.0115915
A_55_P2332731		-2.02095	0.0473843		A_55_P2181542	Sult1d1	-7.91055	0.00131683		A_66_P110633	Apol9b	-101.993	0.000451057		A_55_P2412349	AW111846	-10.8096	0.000419137
A_55_P2330600	4930554C24Rik	2.00047	0.0373523		A_55_P2181538	Sult1d1	-7.03812	0.00031225		A_66_P110623	Gm614	3.99199	0.0199505		A_55_P2412319	A830052D11Rik	-2.75031	8.4183e-05
A_55_P2330215	A730090N16Rik	2.33581	0.00309383		A_55_P2181341	Ecel1	-2.05793	0.00524321		A_66_P110612	Odf3l2	-2.16891	0.00449547		A_55_P2408588	Arntl	2.12225	9.05264e-05
A_55_P2327027	Ano6	-2.04511	0.0122451		A_55_P2181191	Btg1	-2.55601	0.000331084		A_66_P110490	Polr3h	2.40528	5.44023e-05		A_55_P2408112	4930431P03Rik	-3.15677	0.00535245
A_55_P2325803	Tnfrsf11a	-2.92147	6.29649e-06		A_55_P2180769	Gls	-2.42419	0.018155		A_66_P110425	Kif6	-3.82167	0.0304588		A_55_P2407367	9130001E16Rik	-2.72077	0.0281595
A_55_P2323951		-2.00682	0.00270478		A_55_P2180764	Gls	-2.59863	0.0128792		A_66_P110343	Snx10	5.52868	0.000152556		A_55_P2402781	B230216N24Rik	2.01938	0.00160148
A_55_P2322507	A130042O14Rik	-6.15976	0.00648967		A_55_P2179990	Defb33	3.24609	0.0101531		A_66_P110251	Tmem91	-2.25996	0.000850066		A_55_P2398270	5033423O07Rik	2.59158	0.016633
A_55_P2319815	AW552889	4.97364	0.0330588		A_55_P2179974	Spsb1	10.5737	0.00807658		A_66_P110212	Gm15232	-3.38399	0.00251011		A_55_P2393734	4933421H12Rik	2.35989	0.0176637
A_55_P2319730	4930414F18Rik	-2.98497	0.0011367		A_55_P2179587	Celsr3	31.1109	0.000119264		A_66_P110167	Trim38	-72.3405	0.000369739		A_55_P2393558		-3.82801	0.00592515
A_55_P2318584	Aqp8	-165.918	0.000189185		A_55_P2179582	Nmur2	-2.1863	0.00627567		A_66_P110161	Eppk1	-2.05527	0.00665805		A_55_P2389818		-2.7152	0.0315903
A_55_P2316612	6720407P12Rik	-2.0489	0.0189095		A_55_P2179027	Gem	2.5118	0.00845315		A_66_P110016	Ncf2	3.18678	0.00918552		A_55_P2389435	Tiaf2	-4.62821	0.00362731
A_55_P2315012	4930458D05Rik	-2.97193	0.0142566		A_55_P2178491	Fam53b	-2.20159	0.0227572		A_66_P109986	Cd33	7.82252	2.72091e-05		A_55_P2389308		-2.27598	0.0152655
A_55_P2309100	Ky	-11.1531	0.00161603		A_55_P2177953	Aqp11	-2.17781	0.0154363		A_66_P109786	4930528H21Rik	-7.37382	0.00260129		A_55_P2388687	1700003G18Rik	4.14657	0.00233248
A_55_P2307603	R74862	-2.58883	0.00317617		A_55_P2177488	Hist2h2be	-3.02219	0.00443272		A_66_P109708	Il1f6	54.2287	0.000167038		A_55_P2387515	9130208D14Rik	-3.90525	0.000310365
A_55_P2305560		-7.30781	0.0257788		A_55_P2176963	Hsph1	3.89431	0.00530277		A_66_P109681		128.252	7.03066e-07		A_55_P2386236	Ceacam2	2.09957	0.00222065
A_55_P2298438	Trmt10a	2.34753	0.00497181		A_55_P2176670	Pabpc1l2b-ps	2.01958	0.0105516		A_66_P109577	Plcb3	-2.18517	0.0148956		A_55_P2384636		-2.48597	0.0309597
A_55_P2295731	2210019I11Rik	-2.35818	0.0101104		A_55_P2176565	B3galt5	82.8834	1.98208e-05		A_66_P109519	Ehf	2.59652	0.000481192		A_55_P2384593	Gpc6	-2.24515	0.042832
A_55_P2293414	1700001C19Rik	-2.7261	0.000218148		A_55_P2176145	Rgs17	-2.21885	0.0199213		A_66_P109183	Apold1	8.0014	0.00341419		A_55_P2380033	4933433H22Rik	-3.21347	0.0126596
A_55_P2293013	Ces2a	-10.3532	0.00302857		A_55_P2175767	Rangrf	2.03846	0.0442539		A_66_P108999	Tcrg-V7	-27.7468	0.00138051		A_55_P2379719	D130050E23Rik	2.96879	0.0459562
A_55_P2288983	Ceacam2	-3.82601	0.0177074		A_55_P2175595		-5.38285	0.00261638		A_66_P108965	Smpdl3b	-3.92234	0.00103495		A_55_P2377156		-3.17087	0.0227781
A_55_P2288285	2310007J06Rik	-6.16225	0.0276095		A_55_P2175590	Gm5486	5.85873	0.0029438		A_66_P108910	Xpnpep2	-6.29869	0.00469586		A_55_P2376706	A230057D06Rik	-3.42388	0.0350913
A_55_P2288232	Gucy1a2	-2.21851	0.0270771		A_55_P2175400	Zfp467	-2.075	0.0223108		A_66_P108723		-3.39802	0.0336842		A_55_P2374162	4930542N06Rik	-3.60621	0.00670932
A_55_P2287910	Rragd	-2.97702	0.00275897		A_55_P2175065		4.47568	0.0139396		A_66_P108468	2610528A11Rik	7.54531	0.00350692		A_55_P2373987	A730009E18Rik	2.12368	0.00371583
A_55_P2287760	0610038L08Rik	-7.8594	0.000515591		A_55_P2174371	9430038I01Rik	-6.10445	0.0210389		A_66_P108380	A330021E22Rik	8.75859	0.00381592		A_55_P2373774	B430319H21Rik	-2.3825	0.0107554
A_55_P2286493	4933405E24Rik	-4.0228	0.0357736		A_55_P2173982	Rrm2	2.04043	0.00078652		A_66_P108152	Cbr1	-5.33616	0.00284762		A_55_P2372666	9030607L02Rik	2.32805	0.00637339
A_55_P2284119	Zfp395	-2.62346	0.00623705		A_55_P2173702	Ebpl	-3.41782	0.00181552		A_66_P108143	Fbxw10	2.13349	0.0310358		A_55_P2371879	Gcap8	-3.36508	0.00130267
A_55_P2283764	Gm10732	-4.56684	0.00627035		A_55_P2173576		2.0641	0.0413751		A_66_P108059	Ttc39c	-6.36293	0.00355752		A_55_P2363983	Clasp2	-2.21352	0.0219925
A_55_P2282984	6030443J06Rik	7.59387	0.0107579		A_55_P2172196	Thnsl1	-2.02892	0.0230299		A_66_P108019	Heatr1	2.28613	0.000139134		A_55_P2363652		-2.50158	0.0386202
A_55_P2282969	Gm2a	-4.44951	0.00662309		A_55_P2172121	Mxd4	-2.11469	0.00819703		A_66_P108003	Espn	-7.50658	0.00877397		A_55_P2363030	Cmtm4	-2.51217	0.00197475
A_55_P2282336	4933425M03Rik	3.2046	0.0427596		A_55_P2172022	B4galt1	2.93139	0.00163353		A_66_P107943		3.49325	0.000390283		A_55_P2362931	AY512949	-2.29272	0.0221952
A_55_P2279927	Katnal1	-2.1965	0.0187803		A_55_P2171897	Notch1	-2.07576	0.00181433		A_66_P107703	Smox	5.75276	0.000831179		A_55_P2362763	AI853106	-3.64861	0.000204092
A_55_P2278727	Gm2085	-2.38329	0.043079		A_55_P2171608		-2.57354	0.011858		A_66_P107584	Fam133b	-2.97448	0.0315397		A_55_P2362635	Slc9a3	2.30337	0.00213011
A_55_P2278551	1700037F03Rik	-2.01736	0.00134539		A_55_P2171413	Me1	-3.65586	0.0321977		A_66_P107583	Rhox3a	3.59922	0.0220951		A_55_P2360266	4833411C07Rik	-3.30119	0.00535589
A_55_P2277448		-2.18224	0.0400007		A_55_P2171406	Tm7sf2	-2.14045	0.0143977		A_66_P107476	A930035D04Rik	4.92657	0.00286918		A_55_P2359436	A930026B05Rik	-3.40388	0.00977494
A_55_P2275590	A630012P03Rik	2.8005	0.0409386		A_55_P2170732	B930041F14Rik	-3.43672	0.000510058		A_66_P107129	3300005D01Rik	20.3182	0.0023603		A_55_P2353743	Gm2447	5.76738	0.0143689
A_55_P2273656		-3.24332	0.00390795		A_55_P2170536	Zfp949	-2.20552	0.0121108		A_66_P106948	Gm9926	-3.30551	0.0338734		A_55_P2351024	E430024P14Rik	-4.30553	0.00972986
A_55_P2272032	9530025H10Rik	-5.79467	0.0130429		A_55_P2170405		2.10806	0.00956304		A_66_P106744	Syce3	-25.0119	0.000205353		A_55_P2350665	5033404E19Rik	-2.57458	0.00673471
A_55_P2269254	5730419F03Rik	-2.81752	0.0250846		A_55_P2170355		2.57355	0.0164462		A_66_P106388	Ms4a4c	5.0411	0.00854615		A_55_P2350617	Slc37a2	-37.0466	0.000194399
A_55_P2262743	Gm671	2.3494	0.0328024		A_55_P2170225	Sh3bgrl2	2.49577	0.0167322		A_66_P106363	Itgb1bp1	2.78732	0.000424249		A_55_P2349752	8030494B02Rik	2.25158	0.0286745
A_55_P2258832	5230400M03Rik	2.87475	0.0216888		A_55_P2170210	Ap1s3	-2.39218	0.00973375		A_66_P106133	Magi3	-2.26461	3.38341e-05		A_55_P2349258	Ptk2	2.25802	0.0115116
A_55_P2257670	A030001D16Rik	-4.47952	0.0035193		A_55_P2170054	Gm7854	-2.59102	0.00631447		A_66_P106113	Rhoj	3.45308	0.00421843		A_55_P2348126	1500032F14Rik	-2.85817	0.0383315
A_55_P2257381	E330011O21Rik	-2.42544	0.0145422		A_55_P2169694		-2.3071	0.00146601		A_66_P106060	Dtx3l	-3.61803	0.00242607		A_55_P2346644	C730037M02Rik	-9.32661	0.00250405
A_55_P2257341	2410004I01Rik	-2.87305	0.0220123		A_55_P2169356		-2.54477	0.00164755		A_66_P105791	Prkca	-2.15453	0.0225709		A_55_P2345425	Sat2	-9.81921	0.000203861
A_55_P2255554	AA763521	53.7862	0.000232425		A_55_P2169259	Cyp3a25	-74.4847	0.00444837		A_66_P105689	Trim34a	-6.82386	0.00761717		A_55_P2344943	B130055M24Rik	2.05038	0.00814293
A_55_P2255449		-2.14279	1.69703e-05		A_55_P2169247	Gm15056	8.85347	0.0290632		A_66_P105585	Slfn8	3.31671	0.00015997		A_55_P2344804	C87490	6.37481	0.00163551
A_55_P2253746	Nip7	2.08584	0.00140794		A_55_P2168990	Tmsb10	2.54611	0.00263713		A_66_P105422	Lonrf3	2.3592	0.000896514		A_55_P2344608	D7Wsu130e	-2.69556	0.0466818
A_55_P2252105	4921530L18Rik	-2.35728	0.000441475		A_55_P2168899		9.32928	0.00482651		A_66_P105175	Bche	-6.74172	0.00344917		A_55_P2344304	1700012E03Rik	-2.2891	0.0122788
A_55_P2250943	1700024h08rik	-9.09089	0.000120655		A_55_P2168823		3.92025	0.0151894		A_66_P105075	Mmp11	-2.39176	0.00818526		A_55_P2344244	4930556H04Rik	-2.42132	0.0492853
A_55_P2250192		-4.73784	0.000420967		A_55_P2168722	Fmo5	-7.24637	0.00459225		A_66_P105032	Gm13889	3.29812	0.000465606		A_55_P2340101	BC062258	2.49838	0.000441018
A_55_P2249849	Sema6a	-4.41246	0.00204714		A_55_P2168301	Slc46a1	-2.9068	0.00763751		A_66_P104923	Igh-VJ558	-2.47565	0.0418527		A_55_P2339601	AW060742	-2.76404	0.00949711
A_55_P2248556	6530402F18Rik	2.18587	0.0333642		A_55_P2167530	Scube3	-3.49207	0.00244834		A_66_P104747		5.34788	0.0103499		A_55_P2339379	Sass6	2.12034	0.00136793
A_55_P2242094	Gm10494	-3.55091	0.0302024		A_55_P2167525	Scube3	-2.75807	0.013833		A_66_P104525	Trim14	-2.80659	0.00415922		A_55_P2337416	C030010L15Rik	-2.25252	0.00729387
A_55_P2238933	5031415H12Rik	-3.77907	0.00573421		A_55_P2167501	Acsf2	-4.26502	0.015583		A_66_P104473	Polg2	-2.88942	0.00057503		A_55_P2337074	Mid1	2.01778	0.0309773
A_55_P2236291	Ppap2a	-4.00145	0.000391912		A_55_P2167482		2.06529	0.0146222		A_66_P104422	Ckap4	3.78548	0.000183891		A_55_P2337073	Mid1	2.51973	0.0461631
A_55_P2234704	A530047J11Rik	-2.34998	0.0411591		A_55_P2167451	Cnnm2	-3.85069	0.0113701		A_66_P104134	Homer1	-2.02348	0.00101661		A_55_P2334629		-3.17035	0.0200615
A_55_P2233547	9130214F15Rik	-2.36223	0.0325973		A_55_P2167269	Pcsk4	-2.27553	0.00828944		A_66_P103996	Gm14318	-2.66796	0.0249984		A_55_P2334177	4933428C20Rik	-3.4301	0.0247284
A_55_P2232325		-2.2076	0.0368105		A_55_P2167123	Gm12839	-3.81104	0.00191916		A_66_P103198	2210017I01Rik	2.89728	0.0119327		A_55_P2332926	2810037O22Rik	-2.19902	0.0229069
A_55_P2231747		2.26768	0.0197451		A_55_P2166148	H2-M9	-2.18328	0.011487		A_66_P103027	Clec9a	-12.5803	0.000119083		A_55_P2331546	D830026I12Rik	-2.74992	0.00199263
A_55_P2223851		-2.00927	0.0487353		A_55_P2165554		2.89303	0.00203149		A_66_P102879	Thra	-2.83504	0.00189766		A_55_P2330215	A730090N16Rik	2.85647	0.00505391
A_55_P2222870	Mylk	-2.694	0.00682325		A_55_P2165191	Gm7420	-4.83222	0.00140642		A_66_P102528	Tspan5	-3.3645	0.00732278		A_55_P2329298	Gm12758	2.1185	0.00419038
A_55_P2221236	AU024180	-2.16002	0.0457309		A_55_P2164694		2.09033	0.0428946		A_66_P102467	Casz1	-3.5106	0.0132237		A_55_P2328647	4930567K12Rik	-3.00119	0.00393866
A_55_P2219257	5830405M20Rik	2.22031	0.0110477		A_55_P2163729	Tvp23a	-5.02398	0.00159374		A_66_P102346		-5.36271	0.0450898		A_55_P2327027	Ano6	-2.14243	0.0116277
A_55_P2217876		-2.16999	0.0191064		A_55_P2163682	LOC386400	-3.2169	0.00415248		A_66_P102143		-6.86808	0.0386551		A_55_P2326260	4930525G20Rik	-2.05971	0.000225407
A_55_P2217831	2900054C01Rik	3.50113	0.00192522		A_55_P2163591	Gm9484	-2.68278	0.0171208		A_66_P102049	Zfp1	5.85886	0.000962402		A_55_P2325803	Tnfrsf11a	-3.57509	2.81056e-06
A_55_P2216822		-2.14677	0.0416849		A_55_P2162880	Cyp3a57	-74.5511	0.00423776		A_66_P101942	Gm9706	-6.58009	0.0233272		A_55_P2325698	2010002M09Rik	-2.22051	0.000946141
A_55_P2213209	LOC269472	27.2313	0.000655033		A_55_P2161794	Cyp2c65	-9.60632	0.000494751		A_66_P101921		-7.16157	0.00122252		A_55_P2322507	A130042O14Rik	-7.96825	0.00551894
A_55_P2212458	LOC548102	-2.5684	0.0011376		A_55_P2161545	Ddx21	2.63182	0.00181839		A_66_P101835	Cd38	3.11841	0.000582842		A_55_P2321919	Gm16863	-2.06418	0.000421884
A_55_P2212259	4930539J05Rik	-3.40399	0.0120752		A_55_P2161410	Serpina3m	4.25715	0.0477289		A_66_P101707	Adam4	-6.81903	0.000501966		A_55_P2320263	C030007I01Rik	2.03022	0.0114718
A_55_P2210724	Trcg1	-2.00641	0.0352043		A_55_P2161390		-2.99916	0.00646229		A_66_P101664	Scai	-2.26451	0.000911379		A_55_P2319815	AW552889	5.41584	0.0171281
A_55_P2208836	4930432N10Rik	5.25168	0.000931008		A_55_P2160825	Xdh	-2.94083	0.0498413		A_66_P101631	Zfp27	-2.5193	0.0472583		A_55_P2318584	Aqp8	-175.581	0.000142329
A_55_P2207342	LOC101056197	-3.38446	0.0380738		A_55_P2160815	Foxd3	6.27609	0.0484349		A_66_P101477	Bglap3	53.5245	0.00302668		A_55_P2317570	1700051A21Rik	-2.19233	0.0359094
A_55_P2207255	Srpx	-4.25007	0.00405877		A_55_P2160726	Tfcp2	10.6193	0.0024999		A_66_P101423	Ogfod3	-7.24175	0.0122608		A_55_P2315057	Ttll8	-2.19336	0.046684
A_55_P2206491	1810062O18Rik	-5.96985	0.000753939		A_55_P2160686	Tsc22d1	-2.0297	0.023241		A_66_P101407	Acat3	2.76246	0.0201879		A_55_P2315012	4930458D05Rik	-2.20001	0.0307425
A_55_P2205769	4933422A05Rik	2.17245	0.0156044		A_55_P2160371	Slc35e2	-2.28057	0.000233837		A_66_P101261	Gm3367	34.5957	0.00166467		A_55_P2312654	BB070754	2.47545	0.00100224
A_55_P2205156	Aamdc	-2.97078	0.00067331		A_55_P2160128	Pls1	-2.12273	0.000186706		A_66_P101251	Chmp3	2.36622	0.00830132		A_55_P2309100	Ky	-28.9244	0.000894514
A_55_P2199917	AU043392	5.94065	0.0426847		A_55_P2159949	Polr1e	2.22887	0.00116661		A_66_P101132	Hist1h2bp	3.95235	0.0192859		A_55_P2307733	E030004H24Rik	-2.01776	0.0145617
A_55_P2199202	Il22	53.5997	0.000197342		A_55_P2159870	Tead4	3.33008	0.00228111		A_66_P100765	Dao	-7.54191	0.00150782		A_55_P2305430	4933411E02Rik	-4.71701	0.0264304
A_55_P2198983	4930415C11Rik	-20.9175	0.000768553		A_55_P2159850		-2.38748	0.0255097		A_66_P100696	Slc26a2	-5.55285	0.00182612		A_55_P2305420	D9Wsu90e	2.15429	0.00443914
A_55_P2198946	Gm10768	-14.5788	0.000648048		A_55_P2159746	Mfsd2b	-2.0376	0.0407032		A_66_P100586		-2.65535	0.0213284		A_55_P2304864	Ros1	-11.4938	0.00240297
A_55_P2197638	1110046J04Rik	-3.46284	8.78311e-05		A_55_P2159555	Adamts4	3.77901	0.00156905		A_66_P100440	Vezf1	-3.39693	0.00797019		A_55_P2303868	5033421B08Rik	-2.37348	0.0029875
A_55_P2197338		-2.14719	5.56235e-05		A_55_P2159485		4.34628	0.00206843		A_66_P100419		-2.04865	0.0260343		A_55_P2302542	1700003D09Rik	-2.47746	0.00825407
A_55_P2196452	9430069I07Rik	-3.24359	0.0205721		A_55_P2159234	Tatdn2	2.28978	0.0361239		A_66_P100186	Psg28	8.54023	0.0029353		A_55_P2302290	E230012P03	-2.07025	4.278e-05
A_55_P2195202	1700016K05Rik	3.02084	0.00649615		A_55_P2158873	Ppid	2.3174	0.00130275		A_65_P20641	Fads2	-2.30574	0.0185369		A_55_P2298438	Trmt10a	2.09517	0.00161652
A_55_P2193809	9530062K07Rik	-2.21763	0.0158533		A_55_P2158592	Sirpb1a	6.18681	0.00390366		A_65_P20174	Phf17	-2.52837	0.00310006		A_55_P2297806	Mapkbp1	-2.43057	0.00505898
A_55_P2193229	A330032P22Rik	2.05739	0.0391975		A_55_P2158547	Cyp2c54	-9.56719	0.0024549		A_65_P19881	Tmem92	3.73447	0.0400071		A_55_P2295731	2210019I11Rik	-2.54567	0.043579
A_55_P2192961	Trim30b	11.2289	0.0040853		A_55_P2158107	Ddx31	2.04939	0.000158599		A_65_P19286	Alg10b	2.06605	0.000633653		A_55_P2293013	Ces2a	-19.0236	0.000498981
A_55_P2192662	Lepr	-2.0626	0.0386008		A_55_P2157814	Gmds	3.1804	0.000391051		A_65_P19149	Nln	2.72856	0.0033254		A_55_P2289707	Cacnb4	-3.22411	0.0245708
A_55_P2189743		-3.75466	0.0340592		A_55_P2157770	Neu2	-2.00523	0.0163014		A_65_P19089	Esrrg	-2.72402	0.0054161		A_55_P2288983	Ceacam2	-3.11779	0.0364597
A_55_P2188862	C030034E14Rik	-2.95556	0.00757269		A_55_P2157532		5.69064	0.00490525		A_65_P18948	Ppm1h	-2.21591	0.0161293		A_55_P2288690	1700066J03Rik	-3.52664	0.0316892
A_55_P2187266	Pop1	2.40667	0.000195916		A_55_P2157335	Rspry1	-2.35187	0.0043214		A_65_P18167	Hnrnpul2	-2.52779	0.0115497		A_55_P2287910	Rragd	-2.27053	0.0058498
A_55_P2186961		-2.42102	0.00546805		A_55_P2157195		-2.56126	0.0293869		A_65_P17602	Pgm5	-2.57617	0.0161493		A_55_P2287760	0610038L08Rik	-22.0203	0.000153318
A_55_P2186929		4.9813	0.011918		A_55_P2156264		-9.62905	0.0124051		A_65_P16680	B4galt5	-2.41067	0.0325819		A_55_P2286493	4933405E24Rik	-2.812	0.0162169
A_55_P2186928		5.22516	0.00929141		A_55_P2155727	Mafa	-2.47247	0.029059		A_65_P16542	Zmiz1	-2.12611	0.0150562		A_55_P2284119	Zfp395	-3.89051	0.00294149
A_55_P2186644	Bard1	7.01324	0.00433979		A_55_P2154994	A030014E15Rik	3.13483	0.0495688		A_65_P16483	Pdzk1	-324.674	1.26085e-05		A_55_P2283764	Gm10732	-9.83382	0.000506757
A_55_P2186499	Duoxa1	50.1914	3.48089e-05		A_55_P2153887	Tatdn3	-2.03469	0.00198844		A_65_P16208	Baz1a	2.1291	0.0285549		A_55_P2283254	A730081D07Rik	-4.58575	0.0260808
A_55_P2186450		4.75262	0.00236698		A_55_P2153783	Fmo1	-4.19718	0.000790635		A_65_P13713	Ank3	-5.0975	0.00179979		A_55_P2282984	6030443J06Rik	7.16948	0.00782312
A_55_P2186395		2.51872	0.00054823		A_55_P2153762	A630081J09Rik	7.35396	0.000344516		A_65_P12392	Timp2	2.09521	0.0243138		A_55_P2282336	4933425M03Rik	2.57015	0.00147591
A_55_P2186282	Agxt2	-2.14884	0.00262513		A_55_P2153517	Enho	5.55495	0.00516344		A_65_P11603	Ldb3	-3.57039	0.00310479		A_55_P2280868	0610005C13Rik	-2.75993	0.0149027
A_55_P2185905	Nrg4	-2.52009	0.012972		A_55_P2152926	Mybbp1a	2.574	3.58924e-05		A_65_P11504	Zfp85-rs1	-2.08047	0.0216444		A_55_P2279927	Katnal1	-3.56897	0.00662524
A_55_P2185900	Nrg4	-2.70694	0.00549296		A_55_P2152771	Lhfpl2	4.51436	0.00332771		A_65_P11326	Col6a4	-2.03292	0.011549		A_55_P2279690	2900076A07Rik	-2.19073	0.0437545
A_55_P2185826	Cyp3a13	-2.84515	0.0129709		A_55_P2151956		-2.18519	0.00459466		A_65_P11011	Gcnt3	3.48369	0.00208175		A_55_P2278727	Gm2085	-3.16794	0.0183228
A_55_P2185821	Cyp3a13	-2.02065	0.0257122		A_55_P2151556	C8g	-2.76832	0.00413968		A_65_P10491	Raph1	2.45869	0.00315108		A_55_P2278093	AI480461	-2.05078	0.0467715
A_55_P2185628		2.25643	0.00167229		A_55_P2151414		13.1222	0.00382765		A_65_P10433	Rpp14	2.05969	0.000405948		A_55_P2276224	9330175E14Rik	3.85979	0.00104478
A_55_P2185143	Fkbp6	-5.13167	0.00105745		A_55_P2151413	Gml	23.9972	0.00112334		A_65_P10351	Atp2b1	-2.79795	0.0155356		A_55_P2275999	C78197	-2.57681	0.0360502
A_55_P2184931	Rbm19	2.09936	0.00487408		A_55_P2150901	Foxo4	-2.19955	0.0370444		A_65_P09523	Scrn3	-2.71554	0.0138138		A_55_P2275590	A630012P03Rik	2.29919	0.0411713
A_55_P2184334	AA386476	-2.07273	0.0131542		A_55_P2150876	Als2cr12	-3.94651	0.00147168		A_65_P09285	2610524H06Rik	3.3323	0.000210602		A_55_P2274378	AW549542	-2.52367	0.00150298
A_55_P2184284	E230019M04Rik	-2.59795	0.0163099		A_55_P2150117		2.17847	0.0448995		A_65_P09090	Arih2	2.19956	0.0101076		A_55_P2273656		-2.68211	0.00225494
A_55_P2184108	Gm10589	3.65382	0.00560412		A_55_P2149921		-7.65995	0.00714139		A_65_P09032	Rab43	-3.15119	0.000798453		A_55_P2272032	9530025H10Rik	-2.1042	0.0113178
A_55_P2184009	Rnd2	-3.17185	0.00725268		A_55_P2149500	Kifc2	-4.19282	0.0127695		A_65_P08971	F3	2.51348	0.0169472		A_55_P2269626	D130019J16Rik	-3.05489	0.0374268
A_55_P2183854	Sctr	27.5913	0.00185342		A_55_P2149189		-2.93534	0.0263151		A_65_P08881	Pabpc1l	2.38491	0.000819179		A_55_P2269254	5730419F03Rik	-2.29336	0.0128226
A_55_P2183597	Tbc1d2	2.22155	0.00536348		A_55_P2149011	Hif1a	4.61431	0.0120553		A_65_P08776	Zfp937	-7.27987	0.00791555		A_55_P2268221	Arhgap10	-2.60409	0.0178028
A_55_P2183578		-2.11073	0.0360048		A_55_P2148809	Zan	-2.56638	0.00354134		A_65_P08768	Fbln1	-3.24513	0.0214005		A_55_P2266744	B930095M22Rik	-2.648	0.026277
A_55_P2183518		-3.01879	0.00124473		A_55_P2148569	A430060F13Rik	11.9897	8.57762e-05		A_65_P08727	Adamts18	-4.42313	0.00643438		A_55_P2266285	6330522J23Rik	2.08197	0.0362039
A_55_P2183513	Gm10614	-4.18837	0.0438279		A_55_P2148402	Cplx2	-2.01883	0.0308174		A_65_P07361	Trim14	-3.42847	0.00774778		A_55_P2262743	Gm671	2.35601	0.00786633
A_55_P2183453	Cldn4	-3.011	0.000492488		A_55_P2148400		-3.2048	0.00134163		A_65_P07062	Serf2	-2.04657	0.0111064		A_55_P2258832	5230400M03Rik	2.29024	0.0261524
A_55_P2183438	Runx1	3.68007	0.000104046		A_55_P2148323	2810021J22Rik	-2.16935	0.0120859		A_65_P07038	Ddx20	2.16503	0.00542142		A_55_P2258612	LOC433461	-2.82068	0.0191289
A_55_P2183433	Rab30	-2.1	0.0263991		A_55_P2148243	Wdr12	2.25813	0.00150445		A_65_P06446	Tfrc	3.01055	0.0022995		A_55_P2257381	E330011O21Rik	-2.68206	0.00194739
A_55_P2182675	Fut7	-6.60104	0.00484865		A_55_P2148071	LOC101056526	-120.357	0.00372426		A_65_P06029	Fam171b	-2.89463	0.00247281		A_55_P2257341	2410004I01Rik	-2.58919	0.0386069
A_55_P2182452	Tnfsf15	2.0885	0.0111017		A_55_P2147897	C2cd4a	2.80587	0.00378113		A_65_P05803		14.4082	1.84373e-05		A_55_P2255554	AA763521	126.388	9.89515e-05
A_55_P2181928	Slc45a3	11.755	0.00636518		A_55_P2147896	C2cd4a	18.4357	0.00208805		A_65_P05396	Rad18	2.19657	0.00120222		A_55_P2254769	4931402G19Rik	-2.47443	0.0330734
A_55_P2181752	Apol7a	-2.76211	6.47104e-05		A_55_P2147876	Fam108a	-2.1916	0.00945623		A_65_P03728	St3gal1	2.41613	0.00195837		A_55_P2253289		2.14311	0.0227475
A_55_P2181542	Sult1d1	-11.6294	0.000641634		A_55_P2147686	Sectm1a	-7.29626	0.00173885		A_65_P03719	Fuca2	-2.07536	0.00400955		A_55_P2252891		2.07902	0.0113934
A_55_P2181538	Sult1d1	-10.6956	7.08654e-05		A_55_P2147566	Tac2	-4.75309	0.00893763		A_65_P03606	Rpap2	4.13199	0.000550154		A_55_P2250943	1700024h08rik	-4.82061	0.00328152
A_55_P2181386	Adm2	10.8294	0.0486494		A_55_P2147250	Caprin2	-4.49292	0.00130023		A_65_P03442	Pgk1	2.35679	0.000599824		A_55_P2250192		-4.61388	0.000690904
A_55_P2181341	Ecel1	-2.42354	0.00492316		A_55_P2147200	Ttc37	2.17254	0.00215261		A_65_P03364	Dennd4a	3.51484	0.0214693		A_55_P2249849	Sema6a	-3.33682	0.00111049
A_55_P2181149	Ccdc112	2.07304	0.00605736		A_55_P2146728	Zfp354a	-2.08534	0.0216557		A_65_P02177	Gstm4	-6.95019	0.00182081		A_55_P2248871	6330563C09Rik	-2.05414	0.00201874
A_55_P2180904	Optc	-7.1931	0.00379891		A_55_P2146254	Ifitm1	6.08589	0.000155704		A_65_P01991	Prrg4	9.34701	0.00176293		A_55_P2243237	AU015621	-3.85866	0.024219
A_55_P2180899	Aldh3a2	-2.08704	0.00688245		A_55_P2146177	Cerk	2.22864	0.00384748		A_65_P01319	Pde4b	9.05179	0.00141629		A_55_P2238875	A830021K08Rik	-3.73234	0.019243
A_55_P2180406	Cdkn2aipnl	2.86366	0.000180049		A_55_P2145804	Aen	2.20054	0.000548126		A_55_P2465382		4.66199	0.000286137		A_55_P2238132	1700081H04Rik	-3.09086	0.0428794
A_55_P2180301	Clcn5	-2.53766	0.0026486		A_55_P2145656		3.12596	0.0360954		A_55_P2462377	Nsf	2.64253	0.00037047		A_55_P2236291	Ppap2a	-3.12038	0.00119678
A_55_P2180249	Mtch2	-2.1364	0.0325988		A_55_P2145637	Ap1s3	-2.1686	0.0127077		A_55_P2462358	Fam118b	2.26187	0.00205308		A_55_P2235958		-2.50117	0.0258767
A_55_P2179990	Defb33	3.18106	0.00922504		A_55_P2145531	Mpst	-3.38026	0.000443411		A_55_P2459006	Agphd1	-5.52798	0.00230335		A_55_P2233547	9130214F15Rik	-5.48006	0.00188041
A_55_P2179974	Spsb1	7.28356	0.00174132		A_55_P2145465	D5Ertd577e	-10.5207	0.00239372		A_55_P2454784	Ifnar1	2.56019	0.00648104		A_55_P2233373	D930023I05Rik	2.48468	0.00676281
A_55_P2179604	Vash1	-2.30736	0.00966216		A_55_P2145149	Cpn2	3.73793	0.00110472		A_55_P2449750	1700047I17Rik2	2.8229	0.0132228		A_55_P2231747		2.54201	0.00573132
A_55_P2179587	Celsr3	39.2729	1.59643e-05		A_55_P2145136		2.15027	0.00230066		A_55_P2448776	Mdn1	2.19076	0.0140939		A_55_P2225460	AW555355	2.43615	0.00491451
A_55_P2179582	Nmur2	-2.91218	0.00298763		A_55_P2144364	Gm4354	-3.66443	0.0116493		A_55_P2444515	Akap2	3.9494	0.00604678		A_55_P2223592	A730062M13Rik	-2.01418	0.0408748
A_55_P2179266		2.34687	0.00293872		A_55_P2144305		27.3011	0.00328764		A_55_P2442017	Samd8	-2.16819	0.0073607		A_55_P2222870	Mylk	-2.04731	0.00201756
A_55_P2179246		-2.27503	0.00533795		A_55_P2144126		2.60077	0.00296823		A_55_P2439712	Ddhd2	-3.68494	0.00312772		A_55_P2221236	AU024180	-2.06647	0.0388658
A_55_P2179027	Gem	3.92797	0.000303922		A_55_P2144090		-6.04411	0.0100386		A_55_P2438722	Ifnar1	2.93312	0.0351746		A_55_P2219982	Hoxa4	-2.58678	0.0142223
A_55_P2178801	Ugt1a10	-2.15201	0.0161803		A_55_P2143923	Slc13a2	-2.90361	0.00647628		A_55_P2431897	Thap6	11.8984	0.000792875		A_55_P2219581	C76332	-2.36385	0.0308853
A_55_P2178800	Ugt1a10	-2.76138	0.034002		A_55_P2143765	Ugt1a6b	-3.34551	0.00612617		A_55_P2429225	Psrc1	5.00318	0.000175867		A_55_P2219257	5830405M20Rik	3.42782	0.00327849
A_55_P2178798	LOC100048662	-2.63626	0.040475		A_55_P2143441		3.35773	0.0226303		A_55_P2427150	C430002N11Rik	-9.99376	0.0101332		A_55_P2219174	2010013B24Rik	4.00096	0.0292194
A_55_P2178491	Fam53b	-2.21784	0.0124634		A_55_P2143042	Gm8096	3.98827	0.0156074		A_55_P2426941	Gprin3	-3.46441	0.000820313		A_55_P2217876		-3.62402	0.0168643
A_55_P2178317	Gm9199	2.2864	0.00239255		A_55_P2143041	Phgdh	3.93271	0.0151011		A_55_P2423463	5730433K22Rik	2.59863	0.00158954		A_55_P2217831	2900054C01Rik	3.20527	0.00208276
A_55_P2177953	Aqp11	-2.54161	0.00372451		A_55_P2142488	Spry3	-2.13333	0.0401486		A_55_P2423228	AI464196	2.60563	0.00221508		A_55_P2213209	LOC269472	33.3327	0.000395709
A_55_P2177755	Cdk2ap1	2.05363	0.000390051		A_55_P2142232	Serpina3i	9.33122	0.0136833		A_55_P2422826	Trgv2	-5.22822	0.00151618		A_55_P2212968	Cd247	-3.09191	0.00561296
A_55_P2177488	Hist2h2be	-4.12296	0.00152343		A_55_P2142226	Serpina3f	3.9686	0.00962394		A_55_P2422650	5031425E22Rik	-5.38886	0.00532024		A_55_P2209258	B430105A11Rik	-4.2127	0.0105962
A_55_P2177445		-2.56415	0.00207569		A_55_P2141860	Aen	2.21309	0.000824939		A_55_P2422164	C130093G08Rik	-15.0761	0.000212229		A_55_P2208836	4930432N10Rik	3.67599	0.000480445
A_55_P2176963	Hsph1	3.82371	0.00186424		A_55_P2141306	Synj2bp	-2.4075	0.0497919		A_55_P2420694		-9.88512	0.00400524		A_55_P2208727		-3.01138	0.00748319
A_55_P2176565	B3galt5	85.2509	1.23085e-05		A_55_P2141152	Ido1	-9.05535	0.019955		A_55_P2419091	2810449G22Rik	6.23444	0.0275839		A_55_P2208041	Stra8	-2.99618	0.020821
A_55_P2176145	Rgs17	-3.13175	0.0051069		A_55_P2141084	Tenm4	-2.02909	0.0412142		A_55_P2417379	4930434F21Rik	2.0314	0.0303426		A_55_P2207342	LOC101056197	-4.3649	0.0274053
A_55_P2175595		-9.24666	0.00109994		A_55_P2141058	Gm4477	-4.03354	0.00205394		A_55_P2416494	8430426J06Rik	-3.81594	0.0209602		A_55_P2206491	1810062O18Rik	-3.40916	0.000171365
A_55_P2175590	Gm5486	18.1315	0.00031467		A_55_P2140863	Vmn1r124	2.4572	0.0421712		A_55_P2415472	4931408D14Rik	-2.37178	0.00762551		A_55_P2205769	4933422A05Rik	2.92193	0.00103692
A_55_P2175400	Zfp467	-2.17851	0.000733637		A_55_P2140835		-3.16653	0.0371712		A_55_P2414707	4732463B04Rik	5.0639	0.00134474		A_55_P2205156	Aamdc	-2.62528	0.000868414
A_55_P2174743	Akap7	-2.21398	0.00265367		A_55_P2140751		2.04928	0.00714304		A_55_P2414619	B130021B11Rik	-3.38953	0.0135263		A_55_P2204396	6030458E02Rik	2.59868	0.00330735
A_55_P2174371	9430038I01Rik	-8.49417	0.000678466		A_55_P2140212		3.63243	0.00201627		A_55_P2414534	0610009L18Rik	2.48355	0.0466102		A_55_P2203284		-2.11298	0.0224438
A_55_P2173982	Rrm2	2.83294	0.00310915		A_55_P2140042	Krt31	-6.44389	0.00133749		A_55_P2414475	AW552393	-5.99209	0.0347657		A_55_P2201454	2310079F09Rik	2.06409	0.0199918
A_55_P2173952	Myh6	-2.21075	0.0216779		A_55_P2139937	Lrrc56	-2.50062	0.00123067		A_55_P2413458	Tfcp2l1	5.01279	0.000589609		A_55_P2201395	2410017I17Rik	3.769	0.000157329
A_55_P2173897	Pla2g2d	2.35595	0.00281134		A_55_P2139431	Ces2h	-4.22674	0.00118781		A_55_P2412349	AW111846	-7.85411	0.00251624		A_55_P2200009		-2.00268	0.0329031
A_55_P2173892	Isg20	2.04635	0.00796104		A_55_P2139261		5.17551	0.0183446		A_55_P2412319	A830052D11Rik	2.28039	0.0202998		A_55_P2199917	AU043392	2.76505	0.0264722
A_55_P2173702	Ebpl	-4.37599	0.00134565		A_55_P2139019	Hivep3	4.8015	0.0232353		A_55_P2411747	AI596198	-9.09549	0.00733488		A_55_P2199202	Il22	49.2053	0.000244766
A_55_P2173576		2.40845	0.0124272		A_55_P2139014	Lcn6	2.32802	0.0392888		A_55_P2407367	9130001E16Rik	-5.88713	5.50139e-05		A_55_P2198983	4930415C11Rik	-21.7017	0.00105707
A_55_P2172956	Cnih2	2.76353	0.00189311		A_55_P2138966	Nab2	-2.0373	0.0494454		A_55_P2406758	5330427O13Rik	-3.6798	0.0426487		A_55_P2198946	Gm10768	-21.7173	0.000222723
A_55_P2172196	Thnsl1	-2.48375	0.00771632		A_55_P2138878	Lrfn4	2.06464	0.00457544		A_55_P2404808	2210406H18Rik	5.91271	7.19248e-06		A_55_P2197638	1110046J04Rik	-2.35652	0.00172706
A_55_P2172022	B4galt1	3.26657	0.000499004		A_55_P2138104		3.10691	0.00142638		A_55_P2401971	AU015680	-3.36128	0.0161346		A_55_P2196452	9430069I07Rik	-2.35371	0.04404
A_55_P2172001	Mrgpra2a	6.92824	0.00501314		A_55_P2138100		2.6345	0.00205796		A_55_P2401403	C030046G05	6.10068	0.00618992		A_55_P2196447	9430069I07Rik	-2.68623	0.00853233
A_55_P2171897	Notch1	-2.25741	0.00344534		A_55_P2137941	Fxyd2	-2.97914	0.00549051		A_55_P2399688	Glipr2	2.34157	0.0224664		A_55_P2196180		-3.03817	0.025826
A_55_P2171608		-2.65394	0.0398536		A_55_P2137527	Fam183b	-2.02198	0.0193812		A_55_P2398264	LOC552912	-2.4723	0.00978978		A_55_P2195202	1700016K05Rik	3.29244	0.00155019
A_55_P2171528	3110082I17Rik	2.01139	0.0305449		A_55_P2137466	Kcnu1	-5.4264	0.0385793		A_55_P2398089	B130024M06Rik	2.2108	0.0459483		A_55_P2193809	9530062K07Rik	-2.21278	0.0246969
A_55_P2171413	Me1	-3.70698	0.0225439		A_55_P2136827	Wfdc16	-13.0142	0.00786194		A_55_P2396312	4930473H19Rik	-2.51677	0.0484027		A_55_P2193760		-2.02489	0.0356544
A_55_P2171406	Tm7sf2	-2.58609	0.00474354		A_55_P2136776	Sult1b1	-2.49815	0.000582102		A_55_P2395911	D2Ertd295e	12.5136	7.99074e-05		A_55_P2193064	6720473M08Rik	2.00219	0.000511918
A_55_P2170881	Arhgap26	-2.24515	0.00690467		A_55_P2136121	9030617O03Rik	-2.84267	0.00509546		A_55_P2394490	D630004K10Rik	-3.31198	0.0429766		A_55_P2192961	Trim30b	17.4556	0.00296535
A_55_P2170732	B930041F14Rik	-2.84212	0.000512603		A_55_P2135526	Gzmc	6.20087	0.00475834		A_55_P2393543		-2.18124	0.00352934		A_55_P2192397	A330023F24Rik	2.11497	0.0431934
A_55_P2170536	Zfp949	-2.12938	0.00881469		A_55_P2135200	Slfn10-ps	2.28581	0.00444696		A_55_P2390965	4933406J10Rik	8.71021	0.0403534		A_55_P2190152	4921509J17Rik	2.44515	0.00854437
A_55_P2170454	Gsta2	-4.80115	0.00152254		A_55_P2135039	Hyi	-2.23793	0.00711212		A_55_P2389435	Tiaf2	-6.47672	0.00106375		A_55_P2189955	Vwa5b2	-2.43908	0.0126333
A_55_P2170355		2.68869	0.00425983		A_55_P2134882	Slc7a15	-2.94528	0.0115624		A_55_P2388687	1700003G18Rik	4.73442	0.00361783		A_55_P2187260		-2.24618	0.0168349
A_55_P2170309	Ppfibp2	-2.63441	0.00171835		A_55_P2134004	Gstm2	-2.92603	0.00147995		A_55_P2387865	4930552P12Rik	-2.63285	0.00917151		A_55_P2187211		-3.97451	0.0151749
A_55_P2170225	Sh3bgrl2	2.9624	0.000281521		A_55_P2133910	Ttll10	2.26985	0.00696683		A_55_P2387515	9130208D14Rik	-82.3802	0.00623622		A_55_P2186929		5.32399	0.0105985
A_55_P2170210	Ap1s3	-3.75878	0.00351401		A_55_P2133835	1700023F06Rik	-2.33408	0.017613		A_55_P2386544	2810004I08Rik	3.80739	0.0328891		A_55_P2186928		5.65376	0.00756164
A_55_P2170054	Gm7854	-2.83844	0.00672525		A_55_P2133546	Ndufaf5	3.16021	0.000116645		A_55_P2386236	Ceacam2	2.40046	0.00200653		A_55_P2186644	Bard1	5.29656	0.0037736
A_55_P2169694		-2.25025	0.00245607		A_55_P2133315	Steap2	2.84141	0.0202115		A_55_P2383533	C130081A10Rik	2.00796	0.0179848		A_55_P2186540		-2.88985	0.0372352
A_55_P2169529		2.00254	0.000110209		A_55_P2133310	Steap2	5.4223	0.01852		A_55_P2382110	Slc38a9	-2.03029	0.0174504		A_55_P2186499	Duoxa1	44.7381	5.68151e-05
A_55_P2169356		-3.88099	0.000384657		A_55_P2133195	Gm4951	2.06362	0.000875601		A_55_P2382105	BC035044	2.4891	0.00928844		A_55_P2186450		3.86152	0.00238079
A_55_P2169259	Cyp3a25	-114.274	0.00135555		A_55_P2132533		-12.971	0.00186406		A_55_P2380806	Gm2115	-3.00629	0.00994857		A_55_P2186395		2.35076	0.0003861
A_55_P2169247	Gm15056	29.1524	0.0021633		A_55_P2132532		-11.7349	0.000961533		A_55_P2379510	LOC628062	4.99468	0.0101863		A_55_P2186282	Agxt2	-2.63368	0.000148548
A_55_P2168990	Tmsb10	2.73588	0.000437484		A_55_P2132154	BC061194	-2.60695	0.0322301		A_55_P2375194	P2rx3	-3.99575	0.0485031		A_55_P2185905	Nrg4	-2.50057	0.0280128
A_55_P2168899		10.5149	0.00281705		A_55_P2131920	Prrx1	-2.8872	0.000504087		A_55_P2374162	4930542N06Rik	-4.5535	0.00418654		A_55_P2185900	Nrg4	-2.86179	0.0499828
A_55_P2168823		4.952	0.00934764		A_55_P2131915	Prrx1	-3.10077	0.00229809		A_55_P2373872		2.64032	0.0330081		A_55_P2185826	Cyp3a13	-3.35295	0.00440495
A_55_P2168722	Fmo5	-10.9537	0.00281472		A_55_P2131473	Rmnd5a	-2.16269	0.0102792		A_55_P2371879	Gcap8	-3.63512	0.00151526		A_55_P2185628		2.38413	0.0020297
A_55_P2168707		-2.10122	0.00539835		A_55_P2131190	Echdc3	-3.39442	0.0125		A_55_P2368710	C230037E05Rik	-3.35679	0.0250478		A_55_P2185407	Gm5258	-3.07373	0.00294141
A_55_P2168667	Rbpms2	-2.63883	0.00755117		A_55_P2130525	Arl14ep	9.25519	0.0232603		A_55_P2367803	Il2	-3.30063	0.0117026		A_55_P2185143	Fkbp6	-3.9594	0.0005327
A_55_P2168643	Khk	-2.2672	0.0124821		A_55_P2130104	Slc52a3	3.61488	0.00125043		A_55_P2367463	Acer2	2.70502	0.00296543		A_55_P2185085		-2.69391	0.0317844
A_55_P2168301	Slc46a1	-4.56459	0.00761314		A_55_P2129925	Mybl2	2.13613	0.0100463		A_55_P2367461	Acer2	3.64088	0.00247445		A_55_P2184751	Eif2c1	-2.52604	0.00814172
A_55_P2168113	Nudcd1	2.29371	0.00120605		A_55_P2129658	Smad6	-2.30266	0.00457466		A_55_P2367007	C330020G15Rik	-5.01618	0.0216195		A_55_P2184676	Tesk2	-2.15649	0.00967109
A_55_P2168014	Prmt7	2.16072	0.0014035		A_55_P2129621	Akp3	-22.5463	0.00459703		A_55_P2364703	9430037G07Rik	3.13919	0.0033267		A_55_P2184123	Atp1a4	2.24734	0.0127992
A_55_P2167530	Scube3	-5.29974	3.66155e-05		A_55_P2129523	Gm9519	12.5729	0.00367455		A_55_P2363652		-10.1402	0.0065536		A_55_P2184108	Gm10589	4.35231	0.000265001
A_55_P2167525	Scube3	-2.04355	0.0344863		A_55_P2129488	Wfdc10	-3.2592	0.0166898		A_55_P2362763	AI853106	-4.41454	0.000149161		A_55_P2184009	Rnd2	-3.33895	0.005188
A_55_P2167501	Acsf2	-9.57578	0.00265747		A_55_P2129469	LOC101056661	-2.11957	0.0134112		A_55_P2361652	LOC101056045	7.69826	0.00192064		A_55_P2183854	Sctr	23.2946	0.00130548
A_55_P2167451	Cnnm2	-5.28194	0.00433712		A_55_P2129309	Foxo3	-2.44606	0.0117133		A_55_P2361547	2610201A13Rik	2.74812	0.00196615		A_55_P2183597	Tbc1d2	2.41511	0.00134616
A_55_P2167269	Pcsk4	-2.3019	0.00319643		A_55_P2129077	Gm5464	-2.10482	0.0373778		A_55_P2360266	4833411C07Rik	-3.04084	0.00596462		A_55_P2183518		-3.10623	0.000686042
A_55_P2167123	Gm12839	-6.36423	0.00145505		A_55_P2128969	Wbscr27	-2.52762	0.000124162		A_55_P2359797	Nod2	4.23349	0.00196094		A_55_P2183513	Gm10614	-2.99931	0.0261209
A_55_P2167112	Kank2	-2.13333	0.00122918		A_55_P2128577	Rnf217	2.1066	0.0141429		A_55_P2359436	A930026B05Rik	-2.34235	0.0348479		A_55_P2183453	Cldn4	-3.69426	0.00819643
A_55_P2166809		-2.1408	0.0104782		A_55_P2128229		4.18037	0.00726607		A_55_P2359110	A230005M16Rik	2.84585	0.00902535		A_55_P2183438	Runx1	3.16265	0.000115892
A_55_P2166501	Cd44	2.3719	0.000428826		A_55_P2127303	Spsb2	-3.0697	0.000451834		A_55_P2356736	6720483E21Rik	2.1662	0.00418841		A_55_P2183352		-2.24268	0.0161587
A_55_P2166486	Cd44	2.23938	0.000585498		A_55_P2126827	Gm9892	2.2167	0.00559979		A_55_P2353743	Gm2447	4.86341	0.0213588		A_55_P2182675	Fut7	-4.36256	0.00137095
A_55_P2166148	H2-M9	-2.03728	0.00172092		A_55_P2126775	Gfpt1	2.18888	0.00703837		A_55_P2353034	4833419O12Rik	24.222	2.13046e-05		A_55_P2181928	Slc45a3	14.8698	0.0078837
A_55_P2165869	Cebpb	2.09698	0.00668733		A_55_P2126572	Tmem25	-2.305	0.00612331		A_55_P2350617	Slc37a2	-35.1544	0.000336961		A_55_P2181542	Sult1d1	-7.55948	0.000774128
A_55_P2165790	Siglech	-2.43638	0.0206155		A_55_P2126333	Cyp2a12	-2.6648	0.00413549		A_55_P2350067	A530072M11Rik	-2.64999	0.00299131		A_55_P2181538	Sult1d1	-8.31928	0.00012156
A_55_P2165554		2.18019	0.00583939		A_55_P2125208	Arid5a	2.31506	0.000490093		A_55_P2349747		-2.76624	0.0205077		A_55_P2181386	Adm2	18.45	0.0124952
A_55_P2165504		3.85463	0.0336591		A_55_P2124736	Col14a1	-2.11956	0.00959622		A_55_P2349258	Ptk2	2.2601	0.0319969		A_55_P2181341	Ecel1	-4.33045	0.0204324
A_55_P2165439	Krt36	2.58378	0.0054266		A_55_P2124712	Ces2c	-2.58275	0.00432317		A_55_P2347906	B230303A05Rik	19.9126	0.00745258		A_55_P2181149	Ccdc112	2.05347	0.00315145
A_55_P2165191	Gm7420	-3.78492	0.00371207		A_55_P2124523		-2.32986	0.000969108		A_55_P2347756	AU040972	-2.19644	0.00272183		A_55_P2180969		2.80011	0.0152016
A_55_P2164932	Gsdmc4	-2.45139	0.0217112		A_55_P2124461		2.23855	0.0101958		A_55_P2346644	C730037M02Rik	-6.10486	0.024299		A_55_P2180861		-2.28647	0.00115095
A_55_P2164890	5830415F09Rik	2.44525	0.0207791		A_55_P2124043	Tceanc	-2.83485	0.0452001		A_55_P2345631	Tcrg-V1	-4.38486	0.00165271		A_55_P2180546	Spats1	-3.39859	0.0317725
A_55_P2164849	Gm6811	-2.00789	0.0137437		A_55_P2123491	B3gnt5	2.64816	0.000698256		A_55_P2344943	B130055M24Rik	-2.30796	0.0422598		A_55_P2180406	Cdkn2aipnl	2.26615	0.000501062
A_55_P2164492	Samhd1	-2.75402	0.00612364		A_55_P2123062	Cbfa2t3	2.70058	0.0151476		A_55_P2344804	C87490	6.3311	0.00169016		A_55_P2180301	Clcn5	-2.71872	0.00212569
A_55_P2164139		2.25998	0.0378787		A_55_P2122997	Tet1	-2.79885	0.00346763		A_55_P2344598	E330037I15Rik	3.09932	0.0275675		A_55_P2179990	Defb33	2.75758	0.0102688
A_55_P2163961	Kcnj5	-2.67809	0.00423885		A_55_P2122464		-14.0386	0.000126202		A_55_P2344244	4930556H04Rik	-3.70695	0.00814999		A_55_P2179974	Spsb1	12.9366	3.19168e-05
A_55_P2163812	42982	-2.59148	0.00302186		A_55_P2122429	Cym	-3.34959	0.0100695		A_55_P2341890		-2.45117	0.00863054		A_55_P2179964	Prickle4	-2.7994	0.00922375
A_55_P2163774	Crip1	-2.22886	0.000305747		A_55_P2122419	Arl1	2.02569	0.0104343		A_55_P2340678	AI849538	2.27142	0.00916765		A_55_P2179884		-3.10593	0.0231379
A_55_P2163729	Tvp23a	-10.2125	0.000320702		A_55_P2122384	Pnpt1	2.08802	0.00836291		A_55_P2340101	BC062258	2.22943	0.00161681		A_55_P2179821	Glyatl3	-2.19432	0.0152129
[truncated: 7,251 more rows]

## Sheet: Figure 1c
Figure 1c
	Liver			Small Intestine
	mock	day 3	day 4	mock	day 3	day 4
[truncated: 9 more rows]

## Sheet: Figure 2b
Figure 2b
[truncated: 8 more rows]

## Sheet: Figure 2c
Figure 2c
[truncated: 15 more rows]

## Sheet: Figure 2e
Figure 2e
[truncated: 5 more rows]

## Sheet: Figure 3a
Figure 3a
[truncated: 24 more rows]

## Sheet: Figure 3b
Figure 3b
[truncated: 21 more rows]

[truncated: 23 more sheets: Figure 3c, Figure 3d, Figure 4a-l, Figure 4m-o, Figure 5a, Figure 5b, Figure 5c,d, Figure 5e-m, Figure 6f, Figure 6h, Figure 7b, Figure 7c, Figure 7d,e, Figure 7f-i, Figure 8e-h, Supplementary Figure 3a-p, Supplementary Figure 4a, Supplementary Figure 4b, Supplementary Figure 4c, Supplementary Figure 5 …]
